# Supplementary material for: Longitudinal plasma proteomics reveals alveolar-capillary barrier disruption in critically ill COVID-19 patients
Source: Research Square preprint supplement (doi:10.21203/rs.3.rs-2872132/v1), 2023-06-14
Supplement: Supplementary file 1 [file fc40c9983163aeddd0e34158.xlsx]

## Sheet: Summary of content
Supplementary data files (SDF) contents:
Protein and clinical data
SDF1. Normalised protein expression and clinical data
SDF1 DD. data dictionary belonging to SDF1
Differential expression analyses:
SDF2. Differential effects of critical disease at baseline
SDF3. Differential effects of critical disease at follow-up
SDF4. Differential effects of time*critical disease
SDF5. Association of protein expression with time to death/intubation
SDF6. Differental effect of imatinib treatment at baseline
SDF7. Differential effects of time*imatinib treatment
SDF8. Differential effects of imatinib on the hamster transcriptome
Pathway analyses
SDF9. Enriched terms for critical disease at baseline
SDF10. Enriched terms for critical disease at follow-up
SDF11. Enriched terms for time* critical disease
SDF12. Enriched terms for time to death/intubation
SDF13. Enriched terms for time*imatinib treatment
SDF14. Enriched terms for transcriptome analysis in Syrian hamster lungs

## Sheet: SDF1
plasmaID	record_id	day	time	randomized_group_blind	Age	Sex	height	weight	bmi	smoke	smoke_PY	co_morb_Diabetes	co_morb_Cardiovascular_disease	co_morb_COPDAstma	co_morb_Heart_arrhythmia_Afib_Af	co_morb_Coronary_Artery_Disease	co_morb_Heart_Conduction_Disorde	co_morb_heart_valve_disease	co_morb_Thrombosis__PE	co_morb_Renal_failure	co_morb_Hepatic_disease	co_morb_Rheumatic_disease	co_morb_Heart_Failure	co_morb_Hypertension	chloroquine_incl	remdesivir	dexamethason	HR_incl	BP_incl	SaO2_incl	FiO2_0	resp_rate_incl	temp	hb_incl	ht_incl	leuko_incl	trombo_incl	eos_incl	baso_incl	neutro_incl	lymfo_incl	monocytes_incl	urea_incl	creat_incl	eGFR_incl	Sodium_incl	Potassium_incl	asat_incl	alat_incl
AMC007 day 0	AMC007	day 0	baseline	Imatinib	56	Male	168	73	25.86	Yes, former		Yes	No	No	No	No	No	No	No	Yes	No	No	No	Yes	no	no	yes	100	135/117	96	24	18	36	7.5	0.38	10.1	265	0	0	9.22	0.5	0.33	42.6	633	8	144	5.6	22	20
AMC007 day 3	AMC007	day 3	follow up	Imatinib	56	Male	168	73	25.86	Yes, former		Yes	No	No	No	No	No	No	No	Yes	No	No	No	Yes	no	no	yes	100	135/117	96	24	18	36	7.5	0.38	10.1	265	0	0	9.22	0.5	0.33	42.6	633	8	144	5.6	22	20
AMC010 day 0	AMC010	day 0	baseline	Placebo	64	Male				Not asked		No	Yes	No	No	No	No	No	No	No	No	No	No	Yes	no	yes	yes	78	120/57	96	26	18		7.7	0.39	9.7	337	0	0.02	8.24	0.68	0.56	5.4	90	77	133	4		33
AMC011 day 0	AMC011	day 0	baseline	Placebo	54	Female	163	91.3	34.36	Yes, former	10	No	No	No	No	No	No	No	No	No	No	No	No	No	no	yes	yes	66	98/64	97	85	28	37.1	8.7		8.7	559	0	0.03	4.64	3.23	0.74	5.3	69	86	141	3.3	18	12
AMC011 day 3	AMC011	day 3	follow up	Placebo	54	Female	163	91.3	34.36	Yes, former	10	No	No	No	No	No	No	No	No	No	No	No	No	No	no	yes	yes	66	98/64	97	85	28	37.1	8.7		8.7	559	0	0.03	4.64	3.23	0.74	5.3	69	86	141	3.3	18	12
AMC012 day 0	AMC012	day 0	baseline	Imatinib	63	Male	174	89	29.4	Yes, former	70	No	No	Yes	No	No	No	No	No	Yes	No	No	No	Yes	no	yes	yes	85	120/67	95	30	15	36.6	7.5		20	468	0	0.03	18.13	1.1	0.57	15.7	142	45	140	4.5		19
AMC013 day 0	AMC013	day 0	baseline	Imatinib	74	Male	173	73	24.39	No		No	Yes	No	No	No	No	No	No	No	No	No	No	Yes	no	yes	yes	85	163/92	94	35	20	36	8.6		15.9	324	0	0.03	13.61	0.84	0.92	14.3	151	38	141	3.6	98	80
AMC014 day 0	AMC014	day 0	baseline	Placebo	44	Male		89		No		Yes	No	No	No	No	No	No	No	No	No	No	No	Yes	no	yes	yes	92	123/68	95	30	28	37.3	7.7		6.3	328	0	0.01	5.23	0.79	0.24	5.7	91	88	140	4.4	50	26
AMC014 day 2	AMC014	day 2	follow up	Placebo	44	Male		89		No		Yes	No	No	No	No	No	No	No	No	No	No	No	Yes	no	yes	yes	92	123/68	95	30	28	37.3	7.7		6.3	328	0	0.01	5.23	0.79	0.24	5.7	91	88	140	4.4	50	26
AMC015 day 0	AMC015	day 0	baseline	Placebo	71	Male	188			Yes, active		Yes	No	No	No	No	No	No	No	No	No	No	No	No	no	yes	yes	60	118/65	92	30	20	36.5	9.5	0.45	6.7	355	0	0	5.81	0.55	0.26	11.3	78	86	139	3.2	47	55
AMC015 day 2	AMC015	day 2	follow up	Placebo	71	Male	188			Yes, active		Yes	No	No	No	No	No	No	No	No	No	No	No	No	no	yes	yes	60	118/65	92	30	20	36.5	9.5	0.45	6.7	355	0	0	5.81	0.55	0.26	11.3	78	86	139	3.2	47	55
AMC016 day 0	AMC016	day 0	baseline	Imatinib	62	Male		61.2		No		No	No	No	No	No	No	No	No	No	No	No	No	No	no	yes	yes	68	129/73	98	24	26	36.6	9.1	0.43	8	225	0	0.02	6.2	0.98	0.74	4.7	89	80	134	3.7		42
AMC017 day 0	AMC017	day 0	baseline	Imatinib	65	Male	179	89	27.78	Yes, former		No	Yes	Yes	No	No	No	No	No	No	No	No	No	No	no	no	yes	75	87/58	94	30	20	36.4	8.7		7.6	250	0	0.01	6.06	0.92	0.59	22.4	126	51	132	4.3	96	82
AMC017 day 3	AMC017	day 3	follow up	Imatinib	65	Male	179	89	27.78	Yes, former		No	Yes	Yes	No	No	No	No	No	No	No	No	No	No	no	no	yes	75	87/58	94	30	20	36.4	8.7		7.6	250	0	0.01	6.06	0.92	0.59	22.4	126	51	132	4.3	96	82
AMC018 day 2	AMC018	day 2	follow up	Imatinib	77	Male	172	88	29.75	No		Yes	Yes	No	No	No	No	No	No	No	No	No	No	Yes	no	yes	yes	75	144/79	95	24		35.4	9.1		7.3	474	0	0.02	6.33	0.6	0.3	6.8	99	63	136	4.5	51	43
AMC019 day 0	AMC019	day 0	baseline	Placebo	61	Male	162	92	35.06	No		Yes	Yes	No	No	No	No	No	No	No	No	No	No	Yes	no	no	no	89	159/90	93	40	24	37.1	7.9		8.9	167	0	0.01	8.07	0.42	0.3	21.6	136	48	140	3.8	45	32
AMC020 day 0	AMC020	day 0	baseline	Placebo	81	Female	165	91	33.43	No		Yes	Yes	No	Yes	No	No	No	No	No	No	No	No	No	no	yes	yes	60	137/76		22		36.5	7.4		8	251	0.07	0.03	4.99	1.82	1.05	6.7	88	53	139	4.5	29	33
AMC021 day 0	AMC021	day 0	baseline	Placebo	66	Male	173	93.7	31.31	Yes, former		No	Yes	Yes	No	No	No	No	No	No	No	No	No	No	no	yes	yes	69	119/58	89	30	24	35.8	8.3		12.3	230	0	0.02	9.4	1.91	0.91	10.4	117	56	130	4.3	37	56
AMC021 day 2	AMC021	day 2	follow up	Placebo	66	Male	173	93.7	31.31	Yes, former		No	Yes	Yes	No	No	No	No	No	No	No	No	No	No	no	yes	yes	69	119/58	89	30	24	35.8	8.3		12.3	230	0	0.02	9.4	1.91	0.91	10.4	117	56	130	4.3	37	56
AMC022 day 2	AMC022	day 2	follow up	Imatinib	51	Male	192	95	25.77	No		No	No	No	No	No	No	No	No	No	No	No	No	No	no	no	yes	101	130/79	95	85	30	38.3	8.4		18	373	0	0.04	15.54	0.91	1.12		73	90			47	62
AMC023 day 0	AMC023	day 0	baseline	Imatinib	56	Male	185	91.6	26.76	No		No	No	No	No	No	No	No	No	No	Yes	No	No	No	no	yes	yes	59	102/59	95	30	18	36.4	9.8	0.47	6.2	172	0	0.01	4.14	1.39	0.64		63	90			48	102
AMC023 day 3	AMC023	day 3	follow up	Imatinib	56	Male	185	91.6	26.76	No		No	No	No	No	No	No	No	No	No	Yes	No	No	No	no	yes	yes	59	102/59	95	30	18	36.4	9.8	0.47	6.2	172	0	0.01	4.14	1.39	0.64		63	90			48	102
AMC024 day 0	AMC024	day 0	baseline	Imatinib	79	Male	169	73	25.56	No		Yes	No	No	No	No	No	Yes	No	No	No	No	No	No	no	yes	yes	60	116/64	94	26	18	36	8	0.39	4.2	111	0	0	3.17	0.78	0.26	11.8	127	46	133	4.1	137	154
AMC024 day 3	AMC024	day 3	follow up	Imatinib	79	Male	169	73	25.56	No		Yes	No	No	No	No	No	Yes	No	No	No	No	No	No	no	yes	yes	60	116/64	94	26	18	36	8	0.39	4.2	111	0	0	3.17	0.78	0.26	11.8	127	46	133	4.1	137	154
AMC025 day 0	AMC025	day 0	baseline	Placebo	67	Female	167	90	32.27	Yes, former		No	Yes	No	No	No	No	No	No	No	No	No	No	Yes	no	no	yes	59	114/65	94	25	14	35	9.1	0.44	5.1	277	0	0.03	6.11	1.33	0.78	6.1	69	78	136	4.3		86
AMC025 day 3	AMC025	day 3	follow up	Placebo	67	Female	167	90	32.27	Yes, former		No	Yes	No	No	No	No	No	No	No	No	No	No	Yes	no	no	yes	59	114/65	94	25	14	35	9.1	0.44	5.1	277	0	0.03	6.11	1.33	0.78	6.1	69	78	136	4.3		86
AMC026 day 0	AMC026	day 0	baseline	Imatinib	84	Male	185	73	21.33	No		No	No	No	No	No	No	No	No	No	No	No	No	No	no	no	yes	65	112/68	96	60	22	36.2	10.6	0.52	8.4	220	0	0.02	6.67	1.28	0.31	9.3	74	80	137	3.7	69	33
AMC026 day 3	AMC026	day 3	follow up	Imatinib	84	Male	185	73	21.33	No		No	No	No	No	No	No	No	No	No	No	No	No	No	no	no	yes	65	112/68	96	60	22	36.2	10.6	0.52	8.4	220	0	0.02	6.67	1.28	0.31	9.3	74	80	137	3.7	69	33
AMC027 day 0	AMC027	day 0	baseline	Placebo	53	Male	177			Not done		No	No	No	No	No	No	No	No	No	No	No	No	No	no	no	yes	75	107/64	96	32	24	35.2	8.5	0.41	8	235	0	0.01	6.87	0.58	0.52	6	85	89	137	3.8	61	42
AMC027 day 2	AMC027	day 2	follow up	Placebo	53	Male	177			Not done		No	No	No	No	No	No	No	No	No	No	No	No	No	no	no	yes	75	107/64	96	32	24	35.2	8.5	0.41	8	235	0	0.01	6.87	0.58	0.52	6	85	89	137	3.8	61	42
AMC028 day 3	AMC028	day 3	follow up	Imatinib	64	Male	175	144	47.02	Not done		No	No	No	No	No	No	No	No	No	No	No	No	Yes	no	no	yes	76	130/64	95	85	26	36.9	8.1	0.41	6.3	224	0	0.02	5.2	0.66	0.29	5.7	73	90	136	3.8	52	34
AMC029 day 0	AMC029	day 0	baseline	Imatinib	68	Female	174	80	26.42	Yes, former	17	No	Yes	No	No	No	No	No	No	No	No	No	Yes	Yes	no	no	yes	67	105/69	95	26	20	37.4	7.7	0.38	15.3	206	0.01	0.02	13.8	1.06	0.23	9.6	93	54	137	3.8	44	55
AMC029 day 3	AMC029	day 3	follow up	Imatinib	68	Female	174	80	26.42	Yes, former	17	No	Yes	No	No	No	No	No	No	No	No	No	Yes	Yes	no	no	yes	67	105/69	95	26	20	37.4	7.7	0.38	15.3	206	0.01	0.02	13.8	1.06	0.23	9.6	93	54	137	3.8	44	55
AMC030 day 0	AMC030	day 0	baseline	Placebo	70	Male	160	70	27.34	Yes, former	20	No	Yes	No	No	No	No	No	No	No	No	No	No	Yes	no	no	yes	72	97/61	95	85	30	35.7	8.3		7.9	250	0	0.02	6.5	0.88	0.49	17.5	166	35	133	4.4	56	27
AMC030 day 3	AMC030	day 3	follow up	Placebo	70	Male	160	70	27.34	Yes, former	20	No	Yes	No	No	No	No	No	No	No	No	No	No	Yes	no	no	yes	72	97/61	95	85	30	35.7	8.3		7.9	250	0	0.02	6.5	0.88	0.49	17.5	166	35	133	4.4	56	27
AMC031 day 0	AMC031	day 0	baseline	Placebo	74	Male	170	87	30.1	No		Yes	No	Yes	No	No	No	No	No	No	No	No	No	No	no	no	yes	80	135/79	94	32	34	36.7	7.8	0.39	4.7	214	0	0	4.01	0.42	0.23	10.5	172	33	136	4.5	67	25
AMC031 day 2	AMC031	day 2	follow up	Placebo	74	Male	170	87	30.1	No		Yes	No	Yes	No	No	No	No	No	No	No	No	No	No	no	no	yes	80	135/79	94	32	34	36.7	7.8	0.39	4.7	214	0	0	4.01	0.42	0.23	10.5	172	33	136	4.5	67	25
AMC032 day 0	AMC032	day 0	baseline	Imatinib	87	Female	161	105	40.51	Yes, former	62	Yes	Yes	Yes	No	No	No	No	No	No	No	No	Yes	Yes	no	no	yes	55	152/69	90	28	24	36.2	8.9		4.8	114	0.01	0.02	3.15	1.12	0.47	7.5	86	52	141	3.8	26	15
AMC032 day 2	AMC032	day 2	follow up	Imatinib	87	Female	161	105	40.51	Yes, former	62	Yes	Yes	Yes	No	No	No	No	No	No	No	No	Yes	Yes	no	no	yes	55	152/69	90	28	24	36.2	8.9		4.8	114	0.01	0.02	3.15	1.12	0.47	7.5	86	52	141	3.8	26	15
AMC033 day 0	AMC033	day 0	baseline	Placebo	77	Male	186	123	35.55	Yes, active	30	Yes	Yes	No	No	No	No	No	No	Yes	No	No	No	Yes	no	no	yes	37	144/80	90	88	26	37	11.2		8.4	170	0.03	0.02	6.73	0.79	0.78	20.3	422	11	134	6.1		32
AMC034 day 2	AMC034	day 2	follow up	Placebo	73	Male	168	70	24.8	No		Yes	Yes	No	No	No	No	No	No	No	No	No	No	Yes	no	no	yes	64	102/60	94	31	30	37.7	8.5	0.39	6.9	196	0	0.01	4.92	1.28	0.61	7.6	75	86	135	3.9		34
AMC035 day 0	AMC035	day 0	baseline	Imatinib	56	Female	174	98	32.37	Not done		Yes	No	No	No	No	No	No	No	No	No	No	No	No	no	no	yes	92	122/75	96	35	36	36.3	7.6	0.38	10.1	537	0	0	9.03	0.92	0.18	8.8	70	83	138	4.8	35	20
AMC035 day 3	AMC035	day 3	follow up	Imatinib	56	Female	174	98	32.37	Not done		Yes	No	No	No	No	No	No	No	No	No	No	No	No	no	no	yes	92	122/75	96	35	36	36.3	7.6	0.38	10.1	537	0	0	9.03	0.92	0.18	8.8	70	83	138	4.8	35	20
AMC036 day 0	AMC036	day 0	baseline	Imatinib	65	Male	196	111	28.89	Not done		No	No	No	No	No	No	No	No	No	No	No	No	No	no	no	yes	118	131/81	89	30	32	39.5	8.9	0.42	13.9	192	0	0.01	12.54	0.6	0.61	6.3	83	85	137	3.7	45	30
AMC036 day 3	AMC036	day 3	follow up	Imatinib	65	Male	196	111	28.89	Not done		No	No	No	No	No	No	No	No	No	No	No	No	No	no	no	yes	118	131/81	89	30	32	39.5	8.9	0.42	13.9	192	0	0.01	12.54	0.6	0.61	6.3	83	85	137	3.7	45	30
AMC037 day 0	AMC037	day 0	baseline	Placebo	82	Male	163	98.7	37.15	Yes, former		Yes	Yes	No	No	No	No	No	No	No	No	No	No	No	no	no	yes	87	187/119	93	30	32	37.1	8.7	0.42	13.2	220	0	0.02	12.06	0.4	0.64	15.8	121	48	136	3.8	100	28
AMC037 day 3	AMC037	day 3	follow up	Placebo	82	Male	163	98.7	37.15	Yes, former		Yes	Yes	No	No	No	No	No	No	No	No	No	No	No	no	no	yes	87	187/119	93	30	32	37.1	8.7	0.42	13.2	220	0	0.02	12.06	0.4	0.64	15.8	121	48	136	3.8	100	28
AMC038 day 0	AMC038	day 0	baseline	Imatinib	66	Male		72.6		Not done		Yes	No	No	No	No	No	Yes	No	No	No	No	No	No	no	no	yes	70	100/68	93	35	22	36.5	9.1	0.46	14	219	0	0.03	12.82	0.65	0.39	9	105	63	136	4.7	106	60
AMC038 day 3	AMC038	day 3	follow up	Imatinib	66	Male		72.6		Not done		Yes	No	No	No	No	No	Yes	No	No	No	No	No	No	no	no	yes	70	100/68	93	35	22	36.5	9.1	0.46	14	219	0	0.03	12.82	0.65	0.39	9	105	63	136	4.7	106	60
AMC039 day 0	AMC039	day 0	baseline	Imatinib	56	Male	175	76.9	25.11	No		No	No	No	No	No	No	No	No	No	No	No	No	No	no	no	yes	91	154/92	95	30	20	37.6	9.6		10.3	433	0.01	0.03	8.96	0.91	0.37	5.7	72	90	133	3.9	83	134
Cath001 day 0	Cath001	day 0	baseline	Placebo	50	Male	180	94	29.01	No		No	No	No	No	No	No	No	No	No	No	Yes	No	No	no	no	no	76	134/97	97	28	12	36.7	8.9		4.3	200	0.03	0.03	2.1	1.8	0.35	3.7	63	90	136	3.8	32	30
Cath001 day 2	Cath001	day 2	follow up	Placebo	50	Male	180	94	29.01	No		No	No	No	No	No	No	No	No	No	No	Yes	No	No	no	no	no	76	134/97	97	28	12	36.7	8.9		4.3	200	0.03	0.03	2.1	1.8	0.35	3.7	63	90	136	3.8	32	30
Cath002 day 2	Cath002	day 2	follow up	Imatinib	63	Male	180	95	29.32	Yes, former	40	No	Yes	No	No	Yes	No	No	No	No	No	No	No	No	no	no	no	72	109/86	95	26	14	37.1	8.1	0.42	5.1	180	0.06	0.03	3.2	1.2	0.7	3.8	88	80	141	3.7	33	37
Cath003 day 3	Cath003	day 3	follow up	Placebo	67	Male	157	65.9	26.74	Yes, former	25	Yes	Yes	No	No	No	No	No	No	Yes	No	No	No	Yes	no	no	no	77	138/41	95	85	24	37.9	8.2		4.5	120	0	0	3.3	1	0.2	13	169	35	129	4.6	50	34
Cath004 day 0	Cath004	day 0	baseline	Imatinib	40	Female	155	60	24.97	No		No	No	No	No	No	No	No	No	No	No	No	No	No	no	no	no	77	98/52	93	20	14	36	7.5		4.3	200	0	0	2.8	1.1	0.3	2.5	47	90	140	4.1	37	26
Cath004 day 2	Cath004	day 2	follow up	Imatinib	40	Female	155	60	24.97	No		No	No	No	No	No	No	No	No	No	No	No	No	No	no	no	no	77	98/52	93	20	14	36	7.5		4.3	200	0	0	2.8	1.1	0.3	2.5	47	90	140	4.1	37	26
Cath005 day 3	Cath005	day 3	follow up	Imatinib	59	Male	180	85	26.23	No		No	No	No	No	No	No	No	No	No	No	No	No	No	no	no	yes	67	115/69	95	28	14	36.6	9.4		4.1	260	0.03	0.03	3.3	0.58	0.24	5.5	76	90	136	4.3	35	25
Cath006 day 0	Cath006	day 0	baseline	Placebo	55	Female	158	90.5	36.25	No		No	No	No	No	No	No	No	No	No	No	Yes	No	No	no	no	yes	98	109/72	95	22	24	37.6	8.5	0.42	6.6	270	0.03	0.03	5.4	0.71	0.48	4.8	59	90	138	3.4	38	19
Cath008 day 0	Cath008	day 0	baseline	Imatinib	74	Male	162	90.4	34.45	No		No	No	No	No	No	No	No	No	No	No	Yes	No	No	no	yes	yes	59	105/66	90	31	14	36.4	7.5		7.7	480	0.03	0.03	6.7	0.7	0.31	11	106	59	138	3.9	74	84
Cath008 day 3	Cath008	day 3	follow up	Imatinib	74	Male	162	90.4	34.45	No		No	No	No	No	No	No	No	No	No	No	Yes	No	No	no	yes	yes	59	105/66	90	31	14	36.4	7.5		7.7	480	0.03	0.03	6.7	0.7	0.31	11	106	59	138	3.9	74	84
Cath009 day 0	Cath009	day 0	baseline	Imatinib	75	Male	172	115	38.87	Yes, active	50	No	No	Yes	Yes	Yes	No	No	No	No	No	No	No	No	no	no	yes	130	106/69	83	100	32	38.9	9.9		11.4	220	0.03	0.03	10	0.68	0.64	6.8	79	89	136	4.1	52	31
Cath010 day 3	Cath010	day 3	follow up	Placebo	66	Male	172	69.1	23.36	No		No	No	No	No	No	No	No	No	No	No	No	No	No	no	no	no	75	142/65	94	28	18	37.2	8.8		14.4	320	0.04	0.03	13	0.95	0.5	5.5	66	90	144	3.6	28	20
Cath011 day 0	Cath011	day 0	baseline	Placebo	50	Female	172	110.9	37.49	Yes, former		No	No	No	No	No	No	No	No	No	No	No	No	No	no	no	yes	69	108/59	96	85	20	37.6	7.7		9.3	370	0.03	0.03	6.5	1.7	1.1	7.2	57	90	138	3.9	36	25
Cath011 day 2	Cath011	day 2	follow up	Placebo	50	Female	172	110.9	37.49	Yes, former		No	No	No	No	No	No	No	No	No	No	No	No	No	no	no	yes	69	108/59	96	85	20	37.6	7.7		9.3	370	0.03	0.03	6.5	1.7	1.1	7.2	57	90	138	3.9	36	25
Cath012 day 0	Cath012	day 0	baseline	Imatinib	80	Male	158	60	24.03	No		No	No	Yes	No	No	No	No	No	No	No	No	No	No	no	no	yes	72	147/72	92	30	14	38.5	9.1		15.4	410	0.03	0.1	12	1.9	1.1	12	123	47	137	4.2	45	22
Cath013 day 0	Cath013	day 0	baseline	Imatinib	40	Female	163	76	28.6	No		No	No	No	No	No	No	No	No	No	No	No	No	No	no	no	yes	60	116/65	95	24	14	36.6	8.1		4.3	310	0.03	0.03	2.9	0.95	0.44	2.8	48	90	139	4.7	31	14
Cath013 day 3	Cath013	day 3	follow up	Imatinib	40	Female	163	76	28.6	No		No	No	No	No	No	No	No	No	No	No	No	No	No	no	no	yes	60	116/65	95	24	14	36.6	8.1		4.3	310	0.03	0.03	2.9	0.95	0.44	2.8	48	90	139	4.7	31	14
Cath014 day 0	Cath014	day 0	baseline	Placebo	61	Female	156	60	24.65	Yes, former	20	Yes	No	No	No	No	No	No	No	No	No	No	No	No	no	no	yes	71	138/82	91	26	18	37.6	9.3	0.42	6.8	310	0.03	0.03	5.6	0.72	0.48	2.3	43	90	136	3.2	40	22
Cath014 day 3	Cath014	day 3	follow up	Placebo	61	Female	156	60	24.65	Yes, former	20	Yes	No	No	No	No	No	No	No	No	No	No	No	No	no	no	yes	71	138/82	91	26	18	37.6	9.3	0.42	6.8	310	0.03	0.03	5.6	0.72	0.48	2.3	43	90	136	3.2	40	22
Cath015 day 0	Cath015	day 0	baseline	Placebo	66	Female	173	84	28.07	No		No	No	No	No	No	No	No	No	No	No	Yes	No	No	no	no	yes	85	128/80	94	33	14	36.7	9.3	0.46	7.9	230	0.03	0.03	6.2	0.9	0.73	3.3	45	90	137	3.3	39	33
Cath015 day 3	Cath015	day 3	follow up	Placebo	66	Female	173	84	28.07	No		No	No	No	No	No	No	No	No	No	No	Yes	No	No	no	no	yes	85	128/80	94	33	14	36.7	9.3	0.46	7.9	230	0.03	0.03	6.2	0.9	0.73	3.3	45	90	137	3.3	39	33
Cath016 day 0	Cath016	day 0	baseline	Imatinib	62	Male	179	97.5	30.43	No		No	No	No	No	No	No	No	No	No	No	No	No	No	no	no	yes	95	126/88	95	28	16	36.7	7.5	0.38	8.6	420	0.03	0.03	7.6	0.58	0.47	11	80	90	144	3.7	100	140
Cath018 day 0	Cath018	day 0	baseline	Placebo	84	Female	154	55	23.19	No		No	No	No	No	No	No	No	No	No	No	No	Yes	No	no	no	yes	80	110/53	95	26	20	37.9	9.1	0.45	6.3	190	0.03	0.03	4.5	1.2	0.5	6.9	77	61	139	4.1	34	14
Cath018 day 3	Cath018	day 3	follow up	Placebo	84	Female	154	55	23.19	No		No	No	No	No	No	No	No	No	No	No	No	Yes	No	no	no	yes	80	110/53	95	26	20	37.9	9.1	0.45	6.3	190	0.03	0.03	4.5	1.2	0.5	6.9	77	61	139	4.1	34	14
Cath019 day 0	Cath019	day 0	baseline	Placebo	74	Female	158	82	32.85	No		No	No	No	Yes	No	No	No	No	No	No	No	Yes	No	no	no	yes	97	152/74	98	32	16	35.7	8.7	0.41	7.4	160	0.03	0.03	4.9	1.9	0.62	7.4	63	83	135	2.6	65	28
Cath019 day 3	Cath019	day 3	follow up	Placebo	74	Female	158	82	32.85	No		No	No	No	Yes	No	No	No	No	No	No	No	Yes	No	no	no	yes	97	152/74	98	32	16	35.7	8.7	0.41	7.4	160	0.03	0.03	4.9	1.9	0.62	7.4	63	83	135	2.6	65	28
Cath020 day 0	Cath020	day 0	baseline	Imatinib	71	Male	180	72	22.22	No		No	No	Yes	No	No	No	No	No	No	No	No	No	Yes	no	no	yes	97	163/91	94	22	18	37.3	8.4	0.42	9.1	350	0.09	0.06	5.9	2	1.1	5.8	66	90	140	4	18	19
Cath020 day 2	Cath020	day 2	follow up	Imatinib	71	Male	180	72	22.22	No		No	No	Yes	No	No	No	No	No	No	No	No	No	Yes	no	no	yes	97	163/91	94	22	18	37.3	8.4	0.42	9.1	350	0.09	0.06	5.9	2	1.1	5.8	66	90	140	4	18	19
Cath021 day 0	Cath021	day 0	baseline	Placebo	83	Female	165	84.3	30.96	No		No	Yes	No	No	No	No	No	No	Yes	No	No	No	Yes	no	no	yes	53	161/69	95	24	16	36	8.2	0.42	10.3	330	0.03	0.03	9.4	0.59	0.28	12	70	69	140	4	26	6.2
Cath021 day 3	Cath021	day 3	follow up	Placebo	83	Female	165	84.3	30.96	No		No	Yes	No	No	No	No	No	No	Yes	No	No	No	Yes	no	no	yes	53	161/69	95	24	16	36	8.2	0.42	10.3	330	0.03	0.03	9.4	0.59	0.28	12	70	69	140	4	26	6.2
Cath022 day 0	Cath022	day 0	baseline	Placebo	73	Male	178	63.2	19.95	No		No	No	Yes	No	No	No	No	No	No	No	No	No	No	no	no	yes	60	117/67	92	30	14	35.3	9.1	0.42	4	180	0.03	0.03	2.7	0.97	0.32	6.7	58	90	138	3.8	65	38
Cath022 day 3	Cath022	day 3	follow up	Placebo	73	Male	178	63.2	19.95	No		No	No	Yes	No	No	No	No	No	No	No	No	No	No	no	no	yes	60	117/67	92	30	14	35.3	9.1	0.42	4	180	0.03	0.03	2.7	0.97	0.32	6.7	58	90	138	3.8	65	38
Cath023 day 0	Cath023	day 0	baseline	Imatinib	73	Male	170	90	31.14	Yes, former		No	No	No	No	No	No	No	No	Yes	No	No	Yes	No	no	no	yes	96	141/76	95	30	16	36.3	7.4	0.36	14.6	380	0.03	0.03	13	0.98	0.5	17	141	42	132	4.7	37	40
Cath023 day 2	Cath023	day 2	follow up	Imatinib	73	Male	170	90	31.14	Yes, former		No	No	No	No	No	No	No	No	Yes	No	No	Yes	No	no	no	yes	96	141/76	95	30	16	36.3	7.4	0.36	14.6	380	0.03	0.03	13	0.98	0.5	17	141	42	132	4.7	37	40
Cath024 day 0	Cath024	day 0	baseline	Imatinib	88	Female	168	80.4	28.49	No		No	Yes	No	Yes	No	No	No	No	No	No	No	Yes	No	no	no	no	70	120/58	94	24	16	37	7.9	0.4	4.1	170	0.03	0.03	3.4	0.53	0.21	7.7	83	54	135	4	30	24
Cath024 day 3	Cath024	day 3	follow up	Imatinib	88	Female	168	80.4	28.49	No		No	Yes	No	Yes	No	No	No	No	No	No	No	Yes	No	no	no	no	70	120/58	94	24	16	37	7.9	0.4	4.1	170	0.03	0.03	3.4	0.53	0.21	7.7	83	54	135	4	30	24
Cath025 day 0	Cath025	day 0	baseline	Imatinib	57	Female	175	80.8	26.38	No		No	No	No	No	No	No	No	No	No	No	No	No	No	no	no	yes	81	121/79	96	26	14	37	7.4	0.38	10.5	570	0.19	0.04	6.2	3.1	0.95	4.9	54	90	138	4.4	43	54
Cath025 day 3	Cath025	day 3	follow up	Imatinib	57	Female	175	80.8	26.38	No		No	No	No	No	No	No	No	No	No	No	No	No	No	no	no	yes	81	121/79	96	26	14	37	7.4	0.38	10.5	570	0.19	0.04	6.2	3.1	0.95	4.9	54	90	138	4.4	43	54
Cath026 day 0	Cath026	day 0	baseline	Imatinib	45	Male	184	84	24.81	No		No	No	No	No	No	No	No	No	No	No	No	No	No	no	no	yes	107	136/91	96	85	40	38	8.1	0.4	12	370	0.03	0.07	11	0.8	0.44	7.6	65	90	141	3.8	47	62
Cath026 day 3	Cath026	day 3	follow up	Imatinib	45	Male	184	84	24.81	No		No	No	No	No	No	No	No	No	No	No	No	No	No	no	no	yes	107	136/91	96	85	40	38	8.1	0.4	12	370	0.03	0.07	11	0.8	0.44	7.6	65	90	141	3.8	47	62
Cath027 day 0	Cath027	day 0	baseline	Placebo	55	Female	167	93.6	33.56	No		Yes	No	No	No	No	No	No	No	No	No	No	No	Yes	no	no	yes	75	184/94	94	35	24	36.6	9.3	0.43	6.7	320	0.03	0.03	5.3	1	0.36	8.8	54	90	137	4.3	29	63
Cath027 day 3	Cath027	day 3	follow up	Placebo	55	Female	167	93.6	33.56	No		Yes	No	No	No	No	No	No	No	No	No	No	No	Yes	no	no	yes	75	184/94	94	35	24	36.6	9.3	0.43	6.7	320	0.03	0.03	5.3	1	0.36	8.8	54	90	137	4.3	29	63
Cath029 day 3	Cath029	day 3	follow up	Placebo	87	Male	180	63.9	19.72	No		No	No	Yes	No	No	No	No	No	No	No	No	No	No	no	no	yes	85	162/77	90	32	28	36.9	8	0.4	17.2	500	0.03	0.06	14	1.2	1.9	8	67	81	134	4	39	31
Cath030 day 3	Cath030	day 3	follow up	Placebo	84	Male		95.7		No		No	No	No	No	No	No	No	No	No	No	No	No	No	no	no	yes	73	119/57	86	100	30	37	8.2		15.4	260	0.03	0.03	14	1.2	0.33	11	82	75	138	3.6	28	13
Cath031 day 0	Cath031	day 0	baseline	Imatinib	61	Male	189	101.1	28.3	No		No	No	No	No	No	No	No	No	No	No	No	No	Yes	no	no	yes	101	134/88	93	26	20	37.8	10	0.48	7.7	130	0.03	0.03	5.8	1.5	0.4	11	95	74	142	4.3	41	31
Cath031 day 3	Cath031	day 3	follow up	Imatinib	61	Male	189	101.1	28.3	No		No	No	No	No	No	No	No	No	No	No	No	No	Yes	no	no	yes	101	134/88	93	26	20	37.8	10	0.48	7.7	130	0.03	0.03	5.8	1.5	0.4	11	95	74	142	4.3	41	31
Cath032 day 0	Cath032	day 0	baseline	Placebo	64	Male	178	95.8	30.24	No		No	No	No	Yes	No	No	No	No	No	No	No	No	No	no	no	yes	57	116/72	93	26	12	36	8.5	0.4	8	190	0.03	0.03	6.9	0.53	0.58	8.5	91	76	138	3.3	43	20
Cath033 day 0	Cath033	day 0	baseline	Imatinib	52	Male	182	91.8	27.71	No		No	No	No	No	No	No	No	No	No	No	Yes	No	No	no	no	yes	81	107/59	95	26	10	35.9	7.7	0.4	5.4	340	0.03	0.03	4	1.1	0.32	7	59	90	138	4.7	56	38
Cath034 day 0	Cath034	day 0	baseline	Placebo	54	Male	175	93.6	30.56	No		No	No	No	No	No	Yes	No	No	No	No	No	No	No	no	no	yes	75	123/71	96	24	16	36.6	8.7	0.41	8.9	170	0.38	0.06	4.7	2.1	1.6	6.4	107	67	135	3.9	32	29
Cath034 day 3	Cath034	day 3	follow up	Placebo	54	Male	175	93.6	30.56	No		No	No	No	No	No	Yes	No	No	No	No	No	No	No	no	no	yes	75	123/71	96	24	16	36.6	8.7	0.41	8.9	170	0.38	0.06	4.7	2.1	1.6	6.4	107	67	135	3.9	32	29
Cath035 day 0	Cath035	day 0	baseline	Imatinib	40	Male	163	100	37.64	No		No	No	No	No	No	No	No	No	No	No	No	No	No	no	no	yes	89	124/68	97	60	28	37.2	8.2	0.42	7	310	0.03	0.04	5.5	1.2	0.24	4.4	71	90	136	4.7	110	100
Cath035 day 3	Cath035	day 3	follow up	Imatinib	40	Male	163	100	37.64	No		No	No	No	No	No	No	No	No	No	No	No	No	No	no	no	yes	89	124/68	97	60	28	37.2	8.2	0.42	7	310	0.03	0.04	5.5	1.2	0.24	4.4	71	90	136	4.7	110	100
Cath036 day 0	Cath036	day 0	baseline	Placebo	61	Male	180	95	29.32	No		No	No	No	No	No	No	No	No	No	No	No	No	Yes	no	no	yes	67	119/70	94	35	20	36.8	9.2	0.44	10.2	330	0.03	0.03	9.2	0.61	0.32	12	96	73	136	3.4	36	26
Cath036 day 3	Cath036	day 3	follow up	Placebo	61	Male	180	95	29.32	No		No	No	No	No	No	No	No	No	No	No	No	No	Yes	no	no	yes	67	119/70	94	35	20	36.8	9.2	0.44	10.2	330	0.03	0.03	9.2	0.61	0.32	12	96	73	136	3.4	36	26
Cath037 day 2	Cath037	day 2	follow up	Imatinib	89	Male	176	73.2	23.63	No		Yes	No	No	No	No	No	No	No	No	No	No	No	No	no	no	yes	60	150/75	89	100	24	35.9	9.7	0.48	8.5	260	0.03	0.3	7.1	1.1	0.3	14	112	50	143	5.3	65	36
Cath038 day 0	Cath038	day 0	baseline	Placebo	50	Female	158	67	26.84	No		No	No	No	No	No	No	No	No	No	No	No	No	No	no	no	yes	74	119/63	92	24	14	35.8	9.1	0.44	9.4	330	0.03	0.03	7.3	1.5	0.54	3.4	43	90	140	3.9	60	59
Cath039 day 3	Cath039	day 3	follow up	Imatinib	78	Male	176	70	22.6	Yes, former		No	No	No	No	No	No	No	No	No	No	No	No	No	no	no	yes	66	146/82	92	28	28	36.1	7.7	0.38	14.2	260	0.03	0.03	13	0.75	0.28	12	101	61	140	4	36	22
Cath040 day 3	Cath040	day 3	follow up	Imatinib	74	Male	170	80.2	27.75	No		No	No	No	No	No	No	No	No	No	No	No	No	No	no	no	yes	71	139/87	93	30	20	37.3	9.9	0.48	13.6	370	0.03	0.05	0.59	0.59	0.44	9.5	78	84	139	4.5	74	29
Cath042 day 0	Cath042	day 0	baseline	Placebo	58	Female	158	87	34.85	No		No	No	No	No	No	No	No	No	No	No	Yes	No	No	no	no	yes	78	141/75	97	24	16	36.8	8.6	0.42	4.8	230	0.03	0.03	3	1.5	0.31	5.4	68	85	133	4	25	35
Cath042 day 2	Cath042	day 2	follow up	Placebo	58	Female	158	87	34.85	No		No	No	No	No	No	No	No	No	No	No	Yes	No	No	no	no	yes	78	141/75	97	24	16	36.8	8.6	0.42	4.8	230	0.03	0.03	3	1.5	0.31	5.4	68	85	133	4	25	35
Cath043 day 0	Cath043	day 0	baseline	Placebo	82	Female	158	62	24.84	No		No	No	No	No	No	No	No	No	No	No	No	No	No	no	no	yes	83	168/79	92	28	24	37.6	8.4	0.41	12.2	270	0.03	0.03	11	1.4	0.25	9.3	83	56	135	4	27	18
Cath043 day 3	Cath043	day 3	follow up	Placebo	82	Female	158	62	24.84	No		No	No	No	No	No	No	No	No	No	No	No	No	No	no	no	yes	83	168/79	92	28	24	37.6	8.4	0.41	12.2	270	0.03	0.03	11	1.4	0.25	9.3	83	56	135	4	27	18
Cath044 day 0	Cath044	day 0	baseline	Imatinib	73	Male	173	96.3	32.18	No		No	No	No	No	No	No	No	No	No	No	No	No	No	no	no	yes	80	115/71	93	26	16	37.9	9.1	0.45	13.6	240	0.03	0.03	13	0.69	0.41	14	120	51	140	3.4	34	26
Cath044 day 3	Cath044	day 3	follow up	Imatinib	73	Male	173	96.3	32.18	No		No	No	No	No	No	No	No	No	No	No	No	No	No	no	no	yes	80	115/71	93	26	16	37.9	9.1	0.45	13.6	240	0.03	0.03	13	0.69	0.41	14	120	51	140	3.4	34	26
Cath045 day 0	Cath045	day 0	baseline	Imatinib	77	Male	165	55	20.2	Yes, former	55	No	No	Yes	No	No	No	No	No	No	No	No	No	No	no	no	yes	67	115/71	93	32	24	36.6	9.3		7.6	270	0.03	0.03	6.5	0.55	0.58	9.2	64	90	142	3.8	77	60
Cath045 day 3	Cath045	day 3	follow up	Imatinib	77	Male	165	55	20.2	Yes, former	55	No	No	Yes	No	No	No	No	No	No	No	No	No	No	no	no	yes	67	115/71	93	32	24	36.6	9.3		7.6	270	0.03	0.03	6.5	0.55	0.58	9.2	64	90	142	3.8	77	60
Cath046 day 0	Cath046	day 0	baseline	Imatinib	59	Female	178	96.9	30.58	No		No	No	No	No	No	No	No	No	No	No	No	No	No	no	no	yes	60	109/66	88	20	14	36.2	8.5	0.42	10.4	460	0.03	0.04	7.7	2	0.67	7.3	56	90	138	4	25	33
Cath046 day 3	Cath046	day 3	follow up	Imatinib	59	Female	178	96.9	30.58	No		No	No	No	No	No	No	No	No	No	No	No	No	No	no	no	yes	60	109/66	88	20	14	36.2	8.5	0.42	10.4	460	0.03	0.04	7.7	2	0.67	7.3	56	90	138	4	25	33
Cath047 day 0	Cath047	day 0	baseline	Placebo	49	Male	178	81	25.56	No		No	No	No	No	No	No	No	No	No	No	No	No	No	no	no	yes	84	111/67	98	28	17	37.8	8.8	0.44	13.2	300	0.03	0.03	12	0.6	0.11	4.8	73	90	142	4	42	48
Cath047 day 3	Cath047	day 3	follow up	Placebo	49	Male	178	81	25.56	No		No	No	No	No	No	No	No	No	No	No	No	No	No	no	no	yes	84	111/67	98	28	17	37.8	8.8	0.44	13.2	300	0.03	0.03	12	0.6	0.11	4.8	73	90	142	4	42	48
Cath048 day 0	Cath048	day 0	baseline	Placebo	77	Female	175	71.3	23.28	No		No	Yes	No	No	No	No	No	No	No	No	No	No	Yes	no	no	yes	53	139/63	93	20	12	36.1	7.9	0.38	5.1	210	0.03	0.03	3.9	0.84	0.32	8.4	58	86	139	4.6	34	26
FG001 day 2	FG001	day 2	follow up	Imatinib	68	Male	178	71	22.41	No		No	Yes	No	No	Yes	No	No	No	No	No	No	No	No	no	no	yes	69	94	94	26	16	36.1	8.3	0.41	6.8	295	0	0	5.5	1	0.4	6.8	77		137	3.5	43	38
FG002 day 0	FG002	day 0	baseline	Imatinib	49	Male	178	80.6	25.44	No		No	No	Yes	No	No	No	No	No	No	No	No	No	No	no	no	yes	90	114/77	95	32	22	37.1	7.6	0.36	12.6	342	0.01	0.03	15.2	0.8	0.9	4.3	67	90	136	4.3	58	29
FG003 day 2	FG003	day 2	follow up	Placebo	55	Female	167.5	109	38.85	Yes, former		No	No	No	No	No	No	No	No	No	No	Yes	No	No	no	no	no	86	131/69	94	28	28	37.4	7.7	0.4	15.9	351	0.06	0.5	12.6	2.1	1.1	3.5	71	82	139	4	18	12
HMC001 day 3	HMC001	day 3	follow up	Imatinib	55	Female	168	117	41.45	No		No	No	Yes	No	No	No	No	Yes	No	No	No	No	No	no	no	no	84	99/67	95	24	28	37.3	7.8	0.4	7.2	309	0.07	0.02	5.35	1.35	0.45	3.2	62	97	140	4.3	50	43
HMC002 day 3	HMC002	day 3	follow up	Imatinib	65	Male	165	67.6	24.83	No		Yes	No	No	No	No	No	No	No	No	No	No	No	No	yes	no	no	91	126/75	98	28	26	36.8	6.4	0.33	10.8	550						4	65	107	141	3.1	74	36
HMC003 day 0	HMC003	day 0	baseline	Placebo	57	Male	170	89.5	30.97	No		Yes	No	No	No	No	No	No	No	No	No	No	No	No	yes	no	no	68	130/75	95	33	18	36.6	9	0.43	7.4	176	0	0.01	5.8	1.22	0.38	6.3	62	104	137	3.6	32	22
HMC003 day 3	HMC003	day 3	follow up	Placebo	57	Male	170	89.5	30.97	No		Yes	No	No	No	No	No	No	No	No	No	No	No	No	yes	no	no	68	130/75	95	33	18	36.6	9	0.43	7.4	176	0	0.01	5.8	1.22	0.38	6.3	62	104	137	3.6	32	22
HMC004 day 2	HMC004	day 2	follow up	Placebo	82	Female	162	85	32.39	No		Yes	No	No	No	No	No	No	No	Yes	No	No	No	Yes	no	no	no	114	138/97	96	30	32	38.8	6.4	0.33	5.2	238	0.04	0.02	2.55	2.01	0.54	21.1	293	12	137	4.8		12
HMC005 day 0	HMC005	day 0	baseline	Imatinib	61	Female	155	68	28.3	No		Yes	No	No	No	No	No	No	No	No	No	No	No	Yes	no	no	no	71	120/55	98	22	14	37.4	6.9	0.36	5.8	262	0	0.02	4.91	1.71	0.31	5.5	82	67	137	4.1		31
HMC006 day 3	HMC006	day 3	follow up	Placebo	49	Female	150	70	31.11	No		No	No	No	No	No	No	No	No	No	No	No	No	No	no	no	no	88	104/62	98	24	24	36.9	7.7	0.37	5.4	245	0	0	4.03	1.1	0.28	2.6	49	110	134	3.7	38	36
HMC007 day 2	HMC007	day 2	follow up	Imatinib	40	Male	178	80.8	25.5	No		No	No	No	No	No	No	No	No	No	No	No	No	Yes	no	no	no	113	158/92	97	26	18	36.6	7.7	0.38	6.8	256	0.01	0.01	5.63	0.61	0.5	4.3	125	61	138	3.5	79	57
HMC009 day 0	HMC009	day 0	baseline	Imatinib	52	Male	175	125	40.82	Yes, active		No	No	No	No	No	No	No	No	No	No	No	No	No	no	yes	no	88	133/76	97	28	28	36.1	9.3	0.47	4.5	187	0.01	0.01	3.08	1.02	0.34	5.4	80	98	137	4.1	34	36
HMC009 day 3	HMC009	day 3	follow up	Imatinib	52	Male	175	125	40.82	Yes, active		No	No	No	No	No	No	No	No	No	No	No	No	No	no	yes	no	88	133/76	97	28	28	36.1	9.3	0.47	4.5	187	0.01	0.01	3.08	1.02	0.34	5.4	80	98	137	4.1	34	36
HMC011 day 0	HMC011	day 0	baseline	Placebo	44	Male	163	84	31.62	No		No	No	No	No	No	No	No	No	No	No	No	No	No	no	yes	yes	71	107/58	92	30	20	37	7.1	0.36	10.1	279	0.02	0.03	8.3	1.37	0.4	6.6	63	113	137	4.2	84	95
HMC011 day 3	HMC011	day 3	follow up	Placebo	44	Male	163	84	31.62	No		No	No	No	No	No	No	No	No	No	No	No	No	No	no	yes	yes	71	107/58	92	30	20	37	7.1	0.36	10.1	279	0.02	0.03	8.3	1.37	0.4	6.6	63	113	137	4.2	84	95
HMC012 day 0	HMC012	day 0	baseline	Placebo	70	Female	162	95	36.2	No		Yes	No	No	No	No	No	No	No	No	No	No	No	Yes	no	no	yes	84	159/93	88	85	32	36.2	7	0.38	8.3	309	0.01	0.02	7.31	0.53	0.45	7.9	59	89	144	4.2	51	26
HMC013 day 0	HMC013	day 0	baseline	Imatinib	55	Male	187	110	31.46	No		No	No	No	No	No	No	No	No	No	No	No	No	No	no	no	yes	91	143/84	96	31	22	36.8	9.8	0.47	7	354						9.8	65	103	143	4.6	42	56
HMC014 day 0	HMC014	day 0	baseline	Imatinib	77	Male	180	103.6	31.98	No		No	Yes	No	No	Yes	No	No	No	No	No	No	No	Yes	no	yes	yes	82	160/65	88	85	28	37.1	7.6	0.38	15.5	238	0	0.03	12.79	0.58	1.9	12.4	93	68	143	3.4	53	31
HMC015 day 0	HMC015	day 0	baseline	Placebo	57	Female	165	76	27.92	Yes, active		No	No	No	No	No	No	No	No	No	No	No	No	No	no	no	yes	101	142/73	95	85	20	36	8.4	0.4	12.4	268	0	0.02	11.6	0.44	0.37	2.8	49	104	144	4.1	87	37
HMC015 day 3	HMC015	day 3	follow up	Placebo	57	Female	165	76	27.92	Yes, active		No	No	No	No	No	No	No	No	No	No	No	No	No	no	no	yes	101	142/73	95	85	20	36	8.4	0.4	12.4	268	0	0.02	11.6	0.44	0.37	2.8	49	104	144	4.1	87	37
HMC016 day 3	HMC016	day 3	follow up	Imatinib	53	Male	173	87	29.07	Yes, former		No	No	No	No	No	No	No	No	No	No	No	No	No	no	no	yes	90	125/98	96	75	40	36.8	9	0.43	14.2	290	0.04	0.04	11.24	1.9	0.96	8.3	81	95	144	4.4	32	52
HMC018 day 3	HMC018	day 3	follow up	Imatinib	31	Male	184	117	34.56	No		Yes	No	No	No	No	No	No	No	No	No	No	No	No	no	no	yes	110	130/71	95	60	23	37.5	9	0.4	4.9	124	0	0	3.82	0.59	0.24	5	75	116	134	3.8	54	30
HMC019 day 0	HMC019	day 0	baseline	Placebo	72	Male	175	81	26.45	No		Yes	No	No	No	No	No	No	No	No	No	No	No	No	no	no	yes	105	117/77	94	32	26	36.9	9.3	0.43	12.3	239	0.09	0.06	9.73	1.28	1.12	13.2	100	64	132	5.5	47	59
HMC019 day 3	HMC019	day 3	follow up	Placebo	72	Male	175	81	26.45	No		Yes	No	No	No	No	No	No	No	No	No	No	No	No	no	no	yes	105	117/77	94	32	26	36.9	9.3	0.43	12.3	239	0.09	0.06	9.73	1.28	1.12	13.2	100	64	132	5.5	47	59
HMC020 day 3	HMC020	day 3	follow up	Imatinib	58	Female	163	103	38.77	No		No	No	No	No	No	No	No	No	No	No	No	No	Yes	no	no	yes	71	103/77	94	24	20	36.7	7.2	0.36	5.6	207	0	0.01	4.22	0.87	0.45	3.6	84	66	132	3.5	20	17
HMC021 day 0	HMC021	day 0	baseline	Imatinib	64	Male	174	95	31.38	Yes, former	5	Yes	No	No	No	No	No	No	No	No	No	Yes	No	Yes	no	no	yes	76	176/90	98	85	18	36.6	8.7	0.42	6.8	195	0	0	5.64	0.82	0.3	6.2	82	87	138	3.7	50	21
HMC021 day 3	HMC021	day 3	follow up	Imatinib	64	Male	174	95	31.38	Yes, former	5	Yes	No	No	No	No	No	No	No	No	No	Yes	No	Yes	no	no	yes	76	176/90	98	85	18	36.6	8.7	0.42	6.8	195	0	0	5.64	0.82	0.3	6.2	82	87	138	3.7	50	21
HMC022 day 0	HMC022	day 0	baseline	Imatinib	53	Female	166	69.7	25.29	Yes, former		No	No	No	No	No	No	No	No	No	No	No	No	No	no	no	yes	55	118/74	94	24	20	36.4	9	0.42	6	295	0	0.01	4.72	0.79	0.52	5.8	44	110	138	3.9	32	22
HMC022 day 2	HMC022	day 2	follow up	Imatinib	53	Female	166	69.7	25.29	Yes, former		No	No	No	No	No	No	No	No	No	No	No	No	No	no	no	yes	55	118/74	94	24	20	36.4	9	0.42	6	295	0	0.01	4.72	0.79	0.52	5.8	44	110	138	3.9	32	22
HMC024 day 0	HMC024	day 0	baseline	Placebo	52	Female	170	140	48.44	Yes, former	34	Yes	Yes	Yes	No	No	No	No	No	No	No	No	No	Yes	no	no	no	66	120/87	96	26	22	36.7	7.6	0.37	6.5	217	0.04	0.02	4.6	1.47	0.36	4.5	61	100	141	3.7	40	39
HMC024 day 2	HMC024	day 2	follow up	Placebo	52	Female	170	140	48.44	Yes, former	34	Yes	Yes	Yes	No	No	No	No	No	No	No	No	No	Yes	no	no	no	66	120/87	96	26	22	36.7	7.6	0.37	6.5	217	0.04	0.02	4.6	1.47	0.36	4.5	61	100	141	3.7	40	39
Isa002 day 3	Isa002	day 3	follow up	Placebo	67	Male	168	74	26.22	No		Yes	No	No	No	Yes	No	No	No	No	No	No	No	Yes	yes	no	yes	85	127/66	90	60	24	38.5	6.8	0.32	30.3	551	0.1	0.1	27.7	1.3	1.2	13.7	146	42	130	4.4	22	15
Isa003 day 0	Isa003	day 0	baseline	Imatinib	79	Male	183	96.2	28.73	Yes, former	33	Yes	Yes	Yes	Yes	No	No	No	No	No	No	No	No	No	no	no	no	85	117/77	96	85	28	36.9	8.7	0.42	7.6	224							138	41	136	4.5	47	41
Isa003 day 3	Isa003	day 3	follow up	Imatinib	79	Male	183	96.2	28.73	Yes, former	33	Yes	Yes	Yes	Yes	No	No	No	No	No	No	No	No	No	no	no	no	85	117/77	96	85	28	36.9	8.7	0.42	7.6	224							138	41	136	4.5	47	41
Isa004 day 0	Isa004	day 0	baseline	Placebo	62	Male	196.5	125	32.37	No		Yes	No	No	Yes	No	No	No	No	No	No	No	No	No	no	no	no	81	127/77	96	32	20	38.8	8.7	0.41	5.1	236	0.1		3.9	0.8		5.3	73	94	129	3.6	45	33
Isa004 day 3	Isa004	day 3	follow up	Placebo	62	Male	196.5	125	32.37	No		Yes	No	No	Yes	No	No	No	No	No	No	No	No	No	no	no	no	81	127/77	96	32	20	38.8	8.7	0.41	5.1	236	0.1		3.9	0.8		5.3	73	94	129	3.6	45	33
Isa005 day 0	Isa005	day 0	baseline	Imatinib	57	Female	165	79	29.02	Yes, former	40	No	No	No	No	No	No	No	No	No	No	No	No	Yes	yes	no	no	66	112/68	97	22	16	37.2	8.1	0.38	7.9	332	0.1		6	1.3		3.7	60	97	136	3.7	34	32
Isa006 day 0	Isa006	day 0	baseline	Placebo	64	Female	166	115.6	41.95	No		No	Yes	No	No	No	No	No	No	No	No	No	No	Yes	yes	no	no	102	146/91	94	85	34	37.1	8	0.37	4.7	399	0.1		4	0.5		4.9	58	93	136		95	62
Isa006 day 3	Isa006	day 3	follow up	Placebo	64	Female	166	115.6	41.95	No		No	Yes	No	No	No	No	No	No	No	No	No	No	Yes	yes	no	no	102	146/91	94	85	34	37.1	8	0.37	4.7	399	0.1		4	0.5		4.9	58	93	136		95	62
Isa007 day 0	Isa007	day 0	baseline	Imatinib	72	Female	159	74.9	29.63	No		No	No	No	No	No	No	No	No	No	No	No	No	Yes	yes	no	no	58	135/96	95	30	20	36.9	8.1	0.4	5.5	210			4.3	0.7		6.6	62	86	139	4	48	26
Isa007 day 3	Isa007	day 3	follow up	Imatinib	72	Female	159	74.9	29.63	No		No	No	No	No	No	No	No	No	No	No	No	No	Yes	yes	no	no	58	135/96	95	30	20	36.9	8.1	0.4	5.5	210			4.3	0.7		6.6	62	86	139	4	48	26
Isa008 day 0	Isa008	day 0	baseline	Imatinib	62	Male	183	85.2	25.44	Yes, former		No	No	No	No	No	No	No	No	No	No	No	No	No	yes	no	no	64	112/67	96	30	24	37.9	9.2	0.42	6.6	126	0.1		5.4	0.7		5.1	75	93	136	3.9	126	166
Isa008 day 3	Isa008	day 3	follow up	Imatinib	62	Male	183	85.2	25.44	Yes, former		No	No	No	No	No	No	No	No	No	No	No	No	No	yes	no	no	64	112/67	96	30	24	37.9	9.2	0.42	6.6	126	0.1		5.4	0.7		5.1	75	93	136	3.9	126	166
Isa009 day 0	Isa009	day 0	baseline	Placebo	77	Male	168	68	24.09	Yes, former		No	No	No	No	No	No	No	No	No	No	No	No	No	yes	no	no	83	115/63	95	28	20	37.2	6.4	0.3	10.9	273	0.1		9.4	0.9		10.8	86	75	135	3.9	79	89
Isa009 day 3	Isa009	day 3	follow up	Placebo	77	Male	168	68	24.09	Yes, former		No	No	No	No	No	No	No	No	No	No	No	No	No	yes	no	no	83	115/63	95	28	20	37.2	6.4	0.3	10.9	273	0.1		9.4	0.9		10.8	86	75	135	3.9	79	89
Isa011 day 0	Isa011	day 0	baseline	Placebo	71	Male	176	101.4	32.74	Yes, former	7	No	No	No	No	No	No	No	No	No	No	No	No	No	yes	no	no	91	154/86	95	85	22	36.7	6.6		8.4	125							124	50			42	46
Isa011 day 3	Isa011	day 3	follow up	Placebo	71	Male	176	101.4	32.74	Yes, former	7	No	No	No	No	No	No	No	No	No	No	No	No	No	yes	no	no	91	154/86	95	85	22	36.7	6.6		8.4	125							124	50			42	46
Isa013 day 0	Isa013	day 0	baseline	Imatinib	64	Male		84.6		No		No	No	No	No	No	No	No	No	No	No	No	No	No	no	no	no	62	118/66	95	28	18	38.5	8.5		5.5	198							80	89	136	4	41	31
Isa013 day 3	Isa013	day 3	follow up	Imatinib	64	Male		84.6		No		No	No	No	No	No	No	No	No	No	No	No	No	No	no	no	no	62	118/66	95	28	18	38.5	8.5		5.5	198							80	89	136	4	41	31
Isa014 day 0	Isa014	day 0	baseline	Imatinib	73	Male	171	80	27.36	Yes, former		No	No	No	No	No	No	No	No	No	No	No	No	No	no	no	no	85	122/70	96	85	36	37.8	6.5	0.35	6.2	219	0.1		6.2	0.5			58	96	126	3.9	73	34
Isa014 day 2	Isa014	day 2	follow up	Imatinib	73	Male	171	80	27.36	Yes, former		No	No	No	No	No	No	No	No	No	No	No	No	No	no	no	no	85	122/70	96	85	36	37.8	6.5	0.35	6.2	219	0.1		6.2	0.5			58	96	126	3.9	73	34
LUMC002 day 0	LUMC002	day 0	baseline	Imatinib	47	Male	196	100	26.03	No		No	No	No	No	No	No	No	No	No	No	No	No	No	no	yes	yes	67	122/79	96	30	12	36.4	8.5	0.408	9.26	315	0	0.01	7.33	1.18	0.74	5.8	84	90	141	4.5	17	20
LUMC004 day 0	LUMC004	day 0	baseline	Placebo	58	Male	195	103.4	27.19	No		Yes	No	No	No	No	No	No	No	No	No	No	No	Yes	no	yes	yes	93	151/89	95	26	22	37	7.6	0.355	6.22	371	0	0.01	4.94	0.84	0.43	6.1	89	82	140	4.9	23	20
LUMC004 day 2	LUMC004	day 2	follow up	Placebo	58	Male	195	103.4	27.19	No		Yes	No	No	No	No	No	No	No	No	No	No	No	Yes	no	yes	yes	93	151/89	95	26	22	37	7.6	0.355	6.22	371	0	0.01	4.94	0.84	0.43	6.1	89	82	140	4.9	23	20
LUMC005 day 0	LUMC005	day 0	baseline	Imatinib	69	Male	180	90	27.78	Yes, former	10	No	No	No	No	No	No	No	No	No	No	No	No	No	no	yes	yes	51	121/59	97	30	14	36.7	9.2	0.425	15.05	241	0	0.06	12.75	1.33	0.91	6.6	76	88	142	4.4	60	51
LUMC005 day 2	LUMC005	day 2	follow up	Imatinib	69	Male	180	90	27.78	Yes, former	10	No	No	No	No	No	No	No	No	No	No	No	No	No	no	yes	yes	51	121/59	97	30	14	36.7	9.2	0.425	15.05	241	0	0.06	12.75	1.33	0.91	6.6	76	88	142	4.4	60	51
LUMC006 day 0	LUMC006	day 0	baseline	Placebo	54	Female	170	93	32.18	No		No	No	No	No	No	No	No	No	No	No	No	No	Yes	no	yes	yes	81	122/75	97	24	16	35.9	9.8	0.475	3.06	220	0	0.01	1.67	0.97	0.41	5	62	90	140	4.8	92	135
LUMC007 day 0	LUMC007	day 0	baseline	Imatinib	51	Male	173	76.6	25.59	Yes, former	26	No	No	Yes	No	No	No	No	No	No	No	No	No	No	no	yes	yes	76	122/85	96	28	16	36.9	8.7	0.44	15.28	528	0	0.01	12.08	1.68	1.51	6.7	83	90	140	5.4	44	68
LUMC008 day 0	LUMC008	day 0	baseline	Placebo	64	Female	162	78	29.72	Yes, former	30	No	No	Yes	No	No	No	No	No	No	No	No	No	Yes	no	yes	yes	83	124/72	93	26	24	36.4	7.3	0.371	5.11	193	0	0.01	3.76	0.98	0.36	9.6	83	64	140	3.8	55	63
LUMC008 day 2	LUMC008	day 2	follow up	Placebo	64	Female	162	78	29.72	Yes, former	30	No	No	Yes	No	No	No	No	No	No	No	No	No	Yes	no	yes	yes	83	124/72	93	26	24	36.4	7.3	0.371	5.11	193	0	0.01	3.76	0.98	0.36	9.6	83	64	140	3.8	55	63
MCA001 day 0	MCA001	day 0	baseline	Imatinib	66	Female	160	79	30.86	Yes, former	22	No	No	Yes	No	No	No	No	No	No	No	No	No	No	yes	no	no	83	121/76	96	85	26	36.4	6.8		8.6	231	0.07	0.01	7.3	1.1	0.1	2.7	51	90	140	4	53	39
MCA001 day 3	MCA001	day 3	follow up	Imatinib	66	Female	160	79	30.86	Yes, former	22	No	No	Yes	No	No	No	No	No	No	No	No	No	No	yes	no	no	83	121/76	96	85	26	36.4	6.8		8.6	231	0.07	0.01	7.3	1.1	0.1	2.7	51	90	140	4	53	39
MCA002 day 0	MCA002	day 0	baseline	Placebo	58	Female	167	124	44.46	No		Yes	No	No	No	No	No	No	No	No	No	No	No	Yes	yes	no	no	87	149/87	92	28	22	37.5	7.1		5.5	311	0.07	0.02	4	1	0.4	1.9	46	90	141	3.8	42	34
MCA002 day 3	MCA002	day 3	follow up	Placebo	58	Female	167	124	44.46	No		Yes	No	No	No	No	No	No	No	No	No	No	No	Yes	yes	no	no	87	149/87	92	28	22	37.5	7.1		5.5	311	0.07	0.02	4	1	0.4	1.9	46	90	141	3.8	42	34
MCA003 day 0	MCA003	day 0	baseline	Imatinib	51	Male	175	103	33.63	No		No	No	Yes	Yes	No	Yes	No	No	No	No	No	No	No	no	no	no	82	110/70	97	27	16	36.6	7.9		8	554	0.28	0.04	5.4	1.9	0.4	3.6	75	90	141	4.6	19	20
MCA003 day 2	MCA003	day 2	follow up	Imatinib	51	Male	175	103	33.63	No		No	No	Yes	Yes	No	Yes	No	No	No	No	No	No	No	no	no	no	82	110/70	97	27	16	36.6	7.9		8	554	0.28	0.04	5.4	1.9	0.4	3.6	75	90	141	4.6	19	20
MCA004 day 0	MCA004	day 0	baseline	Imatinib	70	Male	190	132	36.57	No		No	Yes	No	Yes	No	No	No	No	No	No	No	No	Yes	no	no	no	112	123/85	97	32	20	36.6	7.8		6.9	237	0.18	0.08	5.8	0.6	0.2	5.4	62	90	141	3.6	42	25
MCA004 day 3	MCA004	day 3	follow up	Imatinib	70	Male	190	132	36.57	No		No	Yes	No	Yes	No	No	No	No	No	No	No	No	Yes	no	no	no	112	123/85	97	32	20	36.6	7.8		6.9	237	0.18	0.08	5.8	0.6	0.2	5.4	62	90	141	3.6	42	25
MCA005 day 0	MCA005	day 0	baseline	Placebo	75	Female	163	68	25.59	No		No	Yes	No	No	No	No	No	No	No	No	No	No	Yes	yes	no	no	79	141/89	93	40	30	36.6	8.3		9.1	398	0.16	0.05	7.5	1	0.4	5	55	89	136	3.6	59	42
MCA005 day 3	MCA005	day 3	follow up	Placebo	75	Female	163	68	25.59	No		No	Yes	No	No	No	No	No	No	No	No	No	No	Yes	yes	no	no	79	141/89	93	40	30	36.6	8.3		9.1	398	0.16	0.05	7.5	1	0.4	5	55	89	136	3.6	59	42
MCA006 day 0	MCA006	day 0	baseline	Placebo	52	Female	173	98	32.74	No		Yes	No	Yes	No	No	No	No	No	No	No	No	No	No	no	no	yes	84	130/58	96	22	16	37.2	6.4		5.1	216	0.17	0.03	2.9	1.6	0.4	3.7	48	90	144	3.6	37	37
MCA006 day 2	MCA006	day 2	follow up	Placebo	52	Female	173	98	32.74	No		Yes	No	Yes	No	No	No	No	No	No	No	No	No	No	no	no	yes	84	130/58	96	22	16	37.2	6.4		5.1	216	0.17	0.03	2.9	1.6	0.4	3.7	48	90	144	3.6	37	37
MCA007 day 0	MCA007	day 0	baseline	Imatinib	73	Male	170	77	26.64	No		No	No	No	No	No	No	No	No	No	No	No	No	No	no	no	no	95	132/94(107)	95	60	24	37.4	9.2		5.5	303	0.02	0.01	4.5	0.4	0.6	6.1	73	87	137	3.6	86	104
MCA007 day 3	MCA007	day 3	follow up	Imatinib	73	Male	170	77	26.64	No		No	No	No	No	No	No	No	No	No	No	No	No	No	no	no	no	95	132/94(107)	95	60	24	37.4	9.2		5.5	303	0.02	0.01	4.5	0.4	0.6	6.1	73	87	137	3.6	86	104
MCA008 day 0	MCA008	day 0	baseline	Placebo	81	Male	180	102	31.48	Yes, active	60	No	Yes	No	Yes	No	No	No	No	No	No	No	No	Yes	no	no	no	91	125/78	91	85	28	38.9	8.4	0.4	18.3	109	0	0.16	16.2	1.1	0.8	8.6	88	71	140	3.6	37	17
MCA009 day 0	MCA009	day 0	baseline	Placebo	79	Male	175	80	26.12	Yes, former	25	Yes	No	No	No	No	No	No	No	No	No	No	No	Yes	yes	no	no	67	122/58	95	85	32	35.1	7.5		7.8	225	0.04	0	7.4	0.3	0.2	7.4	89	71	136	3.7	45	48
MCA010 day 0	MCA010	day 0	baseline	Imatinib	73	Male	193	120	32.22	Yes, former	30	No	Yes	No	No	Yes	No	Yes	No	No	No	No	No	No	no	no	yes	82	133/69	94	33	16	36.8	7.9		10.1		0.01	0.01	8.6	1	0.5	7.9	88	75	137	4	29	16
MCA010 day 3	MCA010	day 3	follow up	Imatinib	73	Male	193	120	32.22	Yes, former	30	No	Yes	No	No	Yes	No	Yes	No	No	No	No	No	No	no	no	yes	82	133/69	94	33	16	36.8	7.9		10.1		0.01	0.01	8.6	1	0.5	7.9	88	75	137	4	29	16
MCA011 day 0	MCA011	day 0	baseline	Imatinib	68	Male	178	101.5	32.04	Yes, former	15	Yes	No	Yes	No	No	No	No	No	No	No	No	No	No	no	yes	yes	89	116/70	96	85	20	36.6	8.7	0.41	10.9	248	0	0.04	8.5	1.3	1	11.2	71	90	140	4.2	58	64
MCA011 day 3	MCA011	day 3	follow up	Imatinib	68	Male	178	101.5	32.04	Yes, former	15	Yes	No	Yes	No	No	No	No	No	No	No	No	No	No	no	yes	yes	89	116/70	96	85	20	36.6	8.7	0.41	10.9	248	0	0.04	8.5	1.3	1	11.2	71	90	140	4.2	58	64
MCA012 day 0	MCA012	day 0	baseline	Placebo	31	Female	168	70	24.8	No		No	No	No	No	No	No	No	No	No	No	No	No	No	no	yes	yes	70	104/68	94	24	22	36.4	8	0.38	4.2	212	0	0	3.7	0.4	0.1	4.4	71	90	131	3.5	29	29
MCA013 day 0	MCA013	day 0	baseline	Imatinib	92	Male	172	78	26.37	No		No	No	No	No	No	No	No	No	No	No	No	No	Yes	no	no	yes	66	185/85	95	28	22	36	6.9		8.3	141	0.01	0.01	7.2	0.8	0.2	13.1	147	35	131	4.8	35	24
MCA013 day 2	MCA013	day 2	follow up	Imatinib	92	Male	172	78	26.37	No		No	No	No	No	No	No	No	No	No	No	No	No	Yes	no	no	yes	66	185/85	95	28	22	36	6.9		8.3	141	0.01	0.01	7.2	0.8	0.2	13.1	147	35	131	4.8	35	24
MCA014 day 0	MCA014	day 0	baseline	Placebo	74	Female	158	84	33.65	No		No	No	No	No	No	No	No	No	No	No	No	No	Yes	no	yes	yes	66	139/71	97	30	20	36.7	8.1		4.4	205	0	0	2.7	1.3	0.4	3.5	60	87	136	3.7	33	25
MCA014 day 3	MCA014	day 3	follow up	Placebo	74	Female	158	84	33.65	No		No	No	No	No	No	No	No	No	No	No	No	No	Yes	no	yes	yes	66	139/71	97	30	20	36.7	8.1		4.4	205	0	0	2.7	1.3	0.4	3.5	60	87	136	3.7	33	25
MCA015 day 0	MCA015	day 0	baseline	Placebo	78	Female	162	58.4	22.25	Yes, former	40	No	No	Yes	Yes	No	No	Yes	No	No	No	No	No	No	no	no	yes	81	135/64	92	22	22	36.8	8		7.8	192	0	0.01	6.9	0.7	0.3	7	94	50	134	3.2	23	15
MCA016 day 0	MCA016	day 0	baseline	Placebo	75	Female	160	97	37.89	Yes, former	30	No	No	No	No	No	No	No	No	No	No	No	No	No	no	no	yes	74	114/65	97	85	20	36.9	9.3	0.43	6.4	171	0.1	0.1	3.1	0.6	0.3	4.6	69	74	123	4.1	42	48
MCA016 day 2	MCA016	day 2	follow up	Placebo	75	Female	160	97	37.89	Yes, former	30	No	No	No	No	No	No	No	No	No	No	No	No	No	no	no	yes	74	114/65	97	85	20	36.9	9.3	0.43	6.4	171	0.1	0.1	3.1	0.6	0.3	4.6	69	74	123	4.1	42	48
MCA017 day 0	MCA017	day 0	baseline	Imatinib	65	Male	168	74	26.22	No		Yes	No	No	No	No	No	No	No	No	No	No	No	No	no	no	yes	80	108/69	97	50	28	36.5	7.8		13.7	187	0	0	12.5	0.4	0.2	7.9	74	90	130	3.6	46	68
MCA017 day 3	MCA017	day 3	follow up	Imatinib	65	Male	168	74	26.22	No		Yes	No	No	No	No	No	No	No	No	No	No	No	No	no	no	yes	80	108/69	97	50	28	36.5	7.8		13.7	187	0	0	12.5	0.4	0.2	7.9	74	90	130	3.6	46	68
MCA018 day 3	MCA018	day 3	follow up	Placebo	46	Female	160	97.1	37.93	Not asked		Yes	No	No	No	No	No	No	No	No	No	No	No	Yes	no	no	yes	97	145/78	95	40	97	36.2	7.4	0.38	5.2	351	0	0	3.85	0.5	0.09	4.8	42	90	134	4.2	37	35
MCA019 day 3	MCA019	day 3	follow up	Imatinib	63	Male	185	79	23.08	No		No	No	Yes	No	No	No	No	No	No	No	No	No	No	no	yes	yes	60	137/74	94	24	16	36.4	8.1	0.4	8.1	275	0.01	0.01	7.2	0.5	0.5	4.9	62	90	134	3.9	22	38
MCA020 day 3	MCA020	day 3	follow up	Imatinib	58	Female	164	71.1	26.44	No		Yes	No	No	No	No	No	No	No	No	No	No	No	No	no	no	yes	80	121/67	89	40	16	37.1	7.5	0.35	8.8	184	0	0.02	7.4	1.1	0.3	4.1	69	84	136	3.9	35	23
MCA021 day 0	MCA021	day 0	baseline	Imatinib	78	Male	172	101.9	34.44	No		Yes	No	No	No	No	No	No	No	No	No	No	No	Yes	no	no	yes	52	124/75	92	24	18	37	9.3	0.45	12	306						8.2	69	86	136	4.3		33
MCA021 day 3	MCA021	day 3	follow up	Imatinib	78	Male	172	101.9	34.44	No		Yes	No	No	No	No	No	No	No	No	No	No	No	Yes	no	no	yes	52	124/75	92	24	18	37	9.3	0.45	12	306						8.2	69	86	136	4.3		33
MCA022 day 0	MCA022	day 0	baseline	Placebo	51	Male	180	93	28.7	Yes, former	11	No	No	No	Yes	No	No	No	No	No	No	No	No	No	no	no	yes	82	131/73	94	20	18	36.4	8.7	0.42	5.3	113	0	0	4.5	0.4	0.4	4.3	73	90	133	3.4	15	15
MCA023 day 0	MCA023	day 0	baseline	Placebo	65	Male	184	133.2	39.34	Yes, former	15	No	No	Yes	No	No	No	No	No	No	No	No	No	No	no	no	yes	105	121/75	95	24	28	36.8	9	0.43	4.3	192	0	0.01	3.5	0.5	0.3	4.2	85	83	132	3.7	36	22
MCA023 day 3	MCA023	day 3	follow up	Placebo	65	Male	184	133.2	39.34	Yes, former	15	No	No	Yes	No	No	No	No	No	No	No	No	No	No	no	no	yes	105	121/75	95	24	28	36.8	9	0.43	4.3	192	0	0.01	3.5	0.5	0.3	4.2	85	83	132	3.7	36	22
MCA024 day 0	MCA024	day 0	baseline	Imatinib	58	Male	181	74	22.59	No		No	No	Yes	No	Yes	No	No	No	No	No	No	No	No	no	no	yes	72	113/66	96	60	14	36	8.3	0.39	9.9	230	0	0.01	9.3	0.4	0.2	6.9	92	79	138	3.5	42	30
MCA024 day 2	MCA024	day 2	follow up	Imatinib	58	Male	181	74	22.59	No		No	No	Yes	No	Yes	No	No	No	No	No	No	No	No	no	no	yes	72	113/66	96	60	14	36	8.3	0.39	9.9	230	0	0.01	9.3	0.4	0.2	6.9	92	79	138	3.5	42	30
MCA025 day 0	MCA025	day 0	baseline	Imatinib	44	Female	164	72.3	26.88	No		No	No	No	Yes	No	No	No	No	No	No	No	No	No	no	no	yes	68	118/69	95	20	16	36.5	7.7	0.37	8.3	291	0.01	0.02	6.3	1.4	0.6	4.2	47	90	141	3.2	18	20
MCA026 day 0	MCA026	day 0	baseline	Placebo	63	Male	178	76.6	24.18	Yes, former	20	No	No	No	No	No	No	No	No	No	No	No	No	No	no	no	yes	57	103/63	92	28	18	36.7	8.4	0.4	7	269	0.01	0.01	5.6	1.4	0.3	6.4	71	90	138	3.4	30	35
MCA026 day 2	MCA026	day 2	follow up	Placebo	63	Male	178	76.6	24.18	Yes, former	20	No	No	No	No	No	No	No	No	No	No	No	No	No	no	no	yes	57	103/63	92	28	18	36.7	8.4	0.4	7	269	0.01	0.01	5.6	1.4	0.3	6.4	71	90	138	3.4	30	35
MCA027 day 0	MCA027	day 0	baseline	Imatinib	65	Male	200	110	27.5	Yes, former	10	Yes	No	No	No	No	No	No	No	No	No	No	No	No	no	no	yes	55	136/90	99	31	16	35.1	9	0.43	11.2	126	0	0.01	5.7	2.7	0.5	9.5	81	87	140	4.3	40	31
MCA028 day 0	MCA028	day 0	baseline	Placebo	60	Female	163	113	42.53	No		No	No	No	No	No	No	No	No	No	No	No	No	Yes	no	no	yes	70	136/81	96	60	26	36.5	8.1	0.39	7.8	245	0	0.02	6.4	1	0.3	7.7	110	47	135	2.8	75	44
MCA029 day 0	MCA029	day 0	baseline	Placebo	49	Male	175	69.7	22.76	Yes, former	25	No	No	Yes	No	No	No	No	No	No	No	No	No	No	no	no	yes	90	123/73	95	24	18	36.9	8.3	0.38	5.2	291	0	0	5.8	1.1	0.4	5.8	52	90	138	3.5	39	31
MCA029 day 3	MCA029	day 3	follow up	Placebo	49	Male	175	69.7	22.76	Yes, former	25	No	No	Yes	No	No	No	No	No	No	No	No	No	No	no	no	yes	90	123/73	95	24	18	36.9	8.3	0.38	5.2	291	0	0	5.8	1.1	0.4	5.8	52	90	138	3.5	39	31
MCA030 day 0	MCA030	day 0	baseline	Imatinib	66	Female	160	74.8	29.22	No		No	No	No	No	No	No	No	No	No	No	No	No	Yes	no	no	yes	98	119/65	97	30	20	36	7.7	0.38	14	327	0	0	1.46	0.6	0.3	4.2	73	74	136	4.1	43	36
MCA030 day 3	MCA030	day 3	follow up	Imatinib	66	Female	160	74.8	29.22	No		No	No	No	No	No	No	No	No	No	No	No	No	Yes	no	no	yes	98	119/65	97	30	20	36	7.7	0.38	14	327	0	0	1.46	0.6	0.3	4.2	73	74	136	4.1	43	36
MCA031 day 3	MCA031	day 3	follow up	Imatinib	79	Male	175	67.2	21.94	Yes, former	40	Yes	Yes	Yes	Yes	No	No	No	No	No	No	No	No	No	no	no	yes	91	95/57	92	22	20	36.6	6.2		5.8	156						20.1	162	34	135	4.1	24	16
MCA032 day 0	MCA032	day 0	baseline	Placebo	71	Female	169	96	33.61	No		Yes	Yes	Yes	Yes	No	Yes	No	No	No	No	No	No	No	no	no	no	85	133/79	88	60	22	36.2	6.6	0.32	11.4	307	0	0.01	10.5	0.5	0.4	13.7	103	47	137	3.9	93	51
MCA032 day 2	MCA032	day 2	follow up	Placebo	71	Female	169	96	33.61	No		Yes	Yes	Yes	Yes	No	Yes	No	No	No	No	No	No	No	no	no	no	85	133/79	88	60	22	36.2	6.6	0.32	11.4	307	0	0.01	10.5	0.5	0.4	13.7	103	47	137	3.9	93	51
MCA033 day 0	MCA033	day 0	baseline	Placebo	72	Female	158	60.5	24.23	No		No	No	No	No	No	No	No	Yes	No	No	No	No	No	no	no	yes	90	128/79	97	30	14	35.5	6.9	0.34	15.8	723	0.06	0	14.4	0.8	0.4	7.7	55	90	139	4	74	127
MCA033 day 3	MCA033	day 3	follow up	Placebo	72	Female	158	60.5	24.23	No		No	No	No	No	No	No	No	Yes	No	No	No	No	No	no	no	yes	90	128/79	97	30	14	35.5	6.9	0.34	15.8	723	0.06	0	14.4	0.8	0.4	7.7	55	90	139	4	74	127
MCA034 day 0	MCA034	day 0	baseline	Imatinib	76	Male	175	76.2	24.88	Yes, former	40	No	No	No	No	No	No	No	No	No	No	No	No	Yes	no	no	yes	72	139/76	95	26	20	36.3	8.7	0.43	12.9	431	0	0	11.6	0.4	0.4	8.9	84	77	136	3.8	55	52
MCA035 day 0	MCA035	day 0	baseline	Imatinib	57	Male	177	90.5	28.89	Yes, former	1	No	No	No	No	No	No	No	No	No	No	No	No	No	no	no	yes	70	122/77	89	85	20	36.7	8.9	0.44	13	372	0	0	10.1	1.5	1	7.5	90	81	139	4.8	29	53
MCA036 day 0	MCA036	day 0	baseline	Imatinib	84	Female	170	83	28.72	No		No	Yes	No	No	No	No	No	No	No	No	No	No	Yes	no	no	yes	89	128/81	99	22	18	36.7	8.3	0.42	10.9	438	0.25	0.04	8.6	1.5	0.6	4.2	78	60	134	3.1	77	25
MCA037 day 0	MCA037	day 0	baseline	Placebo	74	Male	180	95	29.32	No		No	No	No	No	No	No	No	No	No	No	No	No	No	no	no	yes	91	123/64	93	24	22	36.6	9.1	0.46	7.1	204	0	0.01	6.1	0.6	0.3	6.1	75	86	140	4	37	20
MCA037 day 3	MCA037	day 3	follow up	Placebo	74	Male	180	95	29.32	No		No	No	No	No	No	No	No	No	No	No	No	No	No	no	no	yes	91	123/64	93	24	22	36.6	9.1	0.46	7.1	204	0	0.01	6.1	0.6	0.3	6.1	75	86	140	4	37	20
MCA038 day 0	MCA038	day 0	baseline	Placebo	75	Male	180	112	34.57	Yes, former	68	No	Yes	Yes	No	Yes	No	No	No	No	No	No	No	Yes	no	no	yes	100	138/75	96	24	20	37.9	8.4	0.4	6.6	144	0	0.01	5.7	0.5	0.5	6.6	69	88	129	3.2	56	30
MCA038 day 3	MCA038	day 3	follow up	Placebo	75	Male	180	112	34.57	Yes, former	68	No	Yes	Yes	No	Yes	No	No	No	No	No	No	No	Yes	no	no	yes	100	138/75	96	24	20	37.9	8.4	0.4	6.6	144	0	0.01	5.7	0.5	0.5	6.6	69	88	129	3.2	56	30
MCA039 day 0	MCA039	day 0	baseline	Imatinib	83	Male	180	78	24.07	Yes, active	65	No	Yes	Yes	No	Yes	No	No	No	No	No	No	No	Yes	no	no	yes	70	141/64	85	22	28	36.6	9.1		10.1	185	0	0.01	7.9	1.1	101	8.9	84	74	136	4.3	64	41
MCA039 day 2	MCA039	day 2	follow up	Imatinib	83	Male	180	78	24.07	Yes, active	65	No	Yes	Yes	No	Yes	No	No	No	No	No	No	No	Yes	no	no	yes	70	141/64	85	22	28	36.6	9.1		10.1	185	0	0.01	7.9	1.1	101	8.9	84	74	136	4.3	64	41
MCA040 day 0	MCA040	day 0	baseline	Placebo	74	Female	173	79.9	26.7	No		Yes	Yes	No	Yes	No	No	No	No	No	No	No	No	Yes	no	no	yes	85	122/79	93	26	28	36.3	9.4	0.45	6	149	0.01	0.03	4.4	0.9	0.7	8.9	77	66	135	3.9	50	45
MCA041 day 0	MCA041	day 0	baseline	Imatinib	57	Male	196	167	43.47	No		No	No	No	No	No	No	No	No	No	No	No	No	No	no	no	yes	75	133/86	94	24	20	37	9.3	0.45	9.6	388	0.03	0.03	7.7	1.1	0.7	4.9	76	90	135	3	40	41
MCA042 day 3	MCA042	day 3	follow up	Placebo	63	Male	184	108.2	31.96	Yes, former	30	No	No	No	No	No	No	No	No	No	No	No	No	No	no	no	yes	64	118/75	92	30	19	36.4	8.9	0.43	12.8	145	0	0.03	11.2	1	0.6	5.1	100	69	134	4	30	20
MCA043 day 0	MCA043	day 0	baseline	Placebo	60	Male	184	80	23.63	No		No	No	No	No	No	No	No	No	No	No	No	No	No	no	no	yes	79	146/83	94	24	18	36.5	7.5	0.37	6.1	180	0.02	0.01	4.8	0.8	0.5	4.4	82	89	136	3.9	165	180
MCA043 day 3	MCA043	day 3	follow up	Placebo	60	Male	184	80	23.63	No		No	No	No	No	No	No	No	No	No	No	No	No	No	no	no	yes	79	146/83	94	24	18	36.5	7.5	0.37	6.1	180	0.02	0.01	4.8	0.8	0.5	4.4	82	89	136	3.9	165	180
MCA044 day 0	MCA044	day 0	baseline	Imatinib	53	Male	183	104.5	31.2	No		Yes	No	No	No	No	No	No	No	No	No	No	No	No	no	no	yes	69	122/74	92	60	18	37.7	9.3	0.43	11.4	203	0	0.01	10.3	0.8	0.4	4.7	79	90	132	3.7	47	36
MCA044 day 3	MCA044	day 3	follow up	Imatinib	53	Male	183	104.5	31.2	No		Yes	No	No	No	No	No	No	No	No	No	No	No	No	no	no	yes	69	122/74	92	60	18	37.7	9.3	0.43	11.4	203	0	0.01	10.3	0.8	0.4	4.7	79	90	132	3.7	47	36
MCA045 day 0	MCA045	day 0	baseline	Imatinib	70	Male	187	112	32.03	No		No	Yes	No	No	No	Yes	No	No	No	No	No	No	Yes	no	no	yes	72	137/71	95	24	20	38.2	9.1	0.43	4.9	179	0	0.01	3.4	1.2	0.3	4.5	108	60	133	3.7	41	39
MCA045 day 2	MCA045	day 2	follow up	Imatinib	70	Male	187	112	32.03	No		No	Yes	No	No	No	Yes	No	No	No	No	No	No	Yes	no	no	yes	72	137/71	95	24	20	38.2	9.1	0.43	4.9	179	0	0.01	3.4	1.2	0.3	4.5	108	60	133	3.7	41	39
MCA046 day 0	MCA046	day 0	baseline	Placebo	84	Male	167	88	31.55	Yes, former		No	No	No	No	No	No	No	No	No	No	No	No	Yes	no	no	yes	64	158/81	92	35	29	36.7	8.3	0.4	7.6	189	0.03	0.01	6	1	0.6	4.2	76	80	135	3.7	54	26
MCA046 day 2	MCA046	day 2	follow up	Placebo	84	Male	167	88	31.55	Yes, former		No	No	No	No	No	No	No	No	No	No	No	No	Yes	no	no	yes	64	158/81	92	35	29	36.7	8.3	0.4	7.6	189	0.03	0.01	6	1	0.6	4.2	76	80	135	3.7	54	26
MCA047 day 0	MCA047	day 0	baseline	Imatinib	91	Male	170	74	25.61	No		No	Yes	No	No	No	No	No	No	No	No	No	Yes	Yes	no	no	yes	82	146/77	95	85	20	36	7.4	0.36	11.7	138	0	0.03	10.9	0.4	0.4	8.2	94	61	130	4.1	91	71
MCA047 day 2	MCA047	day 2	follow up	Imatinib	91	Male	170	74	25.61	No		No	Yes	No	No	No	No	No	No	No	No	No	Yes	Yes	no	no	yes	82	146/77	95	85	20	36	7.4	0.36	11.7	138	0	0.03	10.9	0.4	0.4	8.2	94	61	130	4.1	91	71
MCA048 day 0	MCA048	day 0	baseline	Imatinib	49	Female	174	73.9	24.41	No		No	No	No	No	No	No	No	No	No	No	No	No	No	no	no	yes	79	117/76	96	24	18	36.9	7.9	0.38	4.2	155	0	0.01	3.2	0.8	0.3	5.2	79	76	136	3.8	43	32
MCA049 day 0	MCA049	day 0	baseline	Placebo	59	Female	173	90.4	30.2	No		Yes	No	No	No	No	No	No	No	Yes	No	No	No	Yes	no	no	yes	72	132/83	96	26	17	36.5	6.7	0.32	4.2	174	0	0.01	3	1	0.2	7.1	140	35	130	3.6	31	21
MCA050 day 0	MCA050	day 0	baseline	Imatinib	63	Male	192	89.7	24.33	Yes, former	30	No	No	No	No	No	No	No	No	No	No	No	No	No	no	no	yes	71	111/68	94	40	16	36.6	8.1	0.39	11.8	359	0	0	11.1	0.2	0.3	7	69	90	140	4.2	97	133
MCA050 day 2	MCA050	day 2	follow up	Imatinib	63	Male	192	89.7	24.33	Yes, former	30	No	No	No	No	No	No	No	No	No	No	No	No	No	no	no	yes	71	111/68	94	40	16	36.6	8.1	0.39	11.8	359	0	0	11.1	0.2	0.3	7	69	90	140	4.2	97	133
MCA051 day 0	MCA051	day 0	baseline	Placebo	64	Male	178	95.5	30.14	Yes, former		No	Yes	Yes	No	Yes	No	No	No	No	No	No	No	No	no	no	yes	71	127/71	94	60	16	36.6	8.5	0.4	8.4	186	0	0.01	7.1	1	0.3	16.7	109	62	34	3.7	156	139
MCA051 day 3	MCA051	day 3	follow up	Placebo	64	Male	178	95.5	30.14	Yes, former		No	Yes	Yes	No	Yes	No	No	No	No	No	No	No	No	no	no	yes	71	127/71	94	60	16	36.6	8.5	0.4	8.4	186	0	0.01	7.1	1	0.3	16.7	109	62	34	3.7	156	139
MCA052 day 0	MCA052	day 0	baseline	Imatinib	64	Male	175	76.6	25.01	No		No	No	No	No	No	No	No	No	No	No	No	No	No	no	no	yes	24	120/74	92	40	24	6.7	9.8	0.47	5.7	157	0	0.01	4.4	0.8	0.5	7.3	79	90	137	4.1	46	24
MCA052 day 3	MCA052	day 3	follow up	Imatinib	64	Male	175	76.6	25.01	No		No	No	No	No	No	No	No	No	No	No	No	No	No	no	no	yes	24	120/74	92	40	24	6.7	9.8	0.47	5.7	157	0	0.01	4.4	0.8	0.5	7.3	79	90	137	4.1	46	24
MCA053 day 0	MCA053	day 0	baseline	Placebo	58	Male	186	133.6	38.62	No		No	No	Yes	No	No	No	No	No	No	No	No	No	No	no	no	yes	91	152/90	93	20	16	35.9	10.3	0.49	4.9	143	0	0	2.9	1.3	0.6	5.4	88	83	135	3.8	68	69
MCA053 day 2	MCA053	day 2	follow up	Placebo	58	Male	186	133.6	38.62	No		No	No	Yes	No	No	No	No	No	No	No	No	No	No	no	no	yes	91	152/90	93	20	16	35.9	10.3	0.49	4.9	143	0	0	2.9	1.3	0.6	5.4	88	83	135	3.8	68	69
MCA054 day 0	MCA054	day 0	baseline	Imatinib	53	Male	192	97.7	26.5	No		No	No	No	No	No	No	No	No	No	No	No	No	No	no	no	yes	60	113/77	93	30	18	37.1	9.1	0.44	6.6	257	0.01	0.01	5.1	0.8	0.6	2.5	62	90	137	3.6	140	191
OLVG001 day 0	OLVG001	day 0	baseline	Placebo	53	Female	175			No		No	No	No	No	No	No	No	No	No	No	No	No	No	yes	no	no	88	115/75	96	24	22	39.1	7.5	0.36	9	213	0.1	0.1	7.5	1	0.5	3.7	64	84	132	4.2	24	22
OLVG001 day 2	OLVG001	day 2	follow up	Placebo	53	Female	175			No		No	No	No	No	No	No	No	No	No	No	No	No	No	yes	no	no	88	115/75	96	24	22	39.1	7.5	0.36	9	213	0.1	0.1	7.5	1	0.5	3.7	64	84	132	4.2	24	22
OLVG002 day 0	OLVG002	day 0	baseline	Imatinib	67	Male	179	78	24.34	Yes, former		No	No	No	No	No	No	No	No	No	No	No	No	Yes	yes	no	no	82	122/71	97	25	20	37.9	7.4	0.38	5.4	302	0.1	0.1		0.7	0.1	29	81	82	136	3.5	47	52
OLVG003 day 3	OLVG003	day 3	follow up	Placebo	66	Male	185	86	25.13	No		Yes	No	No	No	No	No	No	No	No	No	No	No	Yes	no	no	no	86	117/71	93	85	28	38.3	5.7	0.29	7	194	0.1	0.1	6.1	0.7	0.3	5.7	68	68	136	3.8	68	48
OLVG004 day 0	OLVG004	day 0	baseline	Imatinib	79	Male		79		Yes, former		No	No	No	No	No	No	No	No	No	No	No	No	No	no	no	no	84	110/63	95	40	24	37.8	7.3	0.38	5.2	161	0.1	0.1	4.2	0.8	0.6	5.5	76	86	133	2.8	75	24
OLVG004 day 2	OLVG004	day 2	follow up	Imatinib	79	Male		79		Yes, former		No	No	No	No	No	No	No	No	No	No	No	No	No	no	no	no	84	110/63	95	40	24	37.8	7.3	0.38	5.2	161	0.1	0.1	4.2	0.8	0.6	5.5	76	86	133	2.8	75	24
OLVG005 day 0	OLVG005	day 0	baseline	Placebo	54	Male	190	120	33.24	No		No	Yes	No	Yes	No	No	No	No	No	No	No	No	Yes	no	no	no	62	100/63	92	60	20	36.7	8.9	0.42	10	152						5.8	80	87	132	3.3	98	48
OLVG005 day 3	OLVG005	day 3	follow up	Placebo	54	Male	190	120	33.24	No		No	Yes	No	Yes	No	No	No	No	No	No	No	No	Yes	no	no	no	62	100/63	92	60	20	36.7	8.9	0.42	10	152						5.8	80	87	132	3.3	98	48
OLVG006 day 0	OLVG006	day 0	baseline	Placebo	71	Female		86.7		Yes, former		No	No	Yes	No	No	No	No	No	No	No	No	No	No	yes	no	no	80	98/63	94	24	30	39.5	7.9		6.5	163	0.1	0.1	5.6	0.7	0.2	6.1	79	62	138	3.9	31	32
OLVG006 day 3	OLVG006	day 3	follow up	Placebo	71	Female		86.7		Yes, former		No	No	Yes	No	No	No	No	No	No	No	No	No	No	yes	no	no	80	98/63	94	24	30	39.5	7.9		6.5	163	0.1	0.1	5.6	0.7	0.2	6.1	79	62	138	3.9	31	32
OLVG007 day 0	OLVG007	day 0	baseline	Imatinib	57	Female		74.6		No		No	No	No	No	No	No	No	No	No	No	No	No	No	no	no	no	80	132/88	98	30	28	37.2	8		5	240	0.1	0.1	3.8	0.9	0.2	2.5	53	90	145	3.9	55	33
OLVG007 day 3	OLVG007	day 3	follow up	Imatinib	57	Female		74.6		No		No	No	No	No	No	No	No	No	No	No	No	No	No	no	no	no	80	132/88	98	30	28	37.2	8		5	240	0.1	0.1	3.8	0.9	0.2	2.5	53	90	145	3.9	55	33
OLVG008 day 3	OLVG008	day 3	follow up	Imatinib	59	Female	161	101	38.96	No		Yes	No	No	No	No	No	No	No	No	No	No	No	Yes	no	no	no	87	134/67	94	22	20	36.7	8.7		4.7	277						4.2	69	75	133	4.3	50	61
OLVG009 day 0	OLVG009	day 0	baseline	Imatinib	63	Male	186	102	29.48	No		Yes	No	No	No	No	No	No	No	No	No	No	No	No	no	no	no	87	143/87	94	22	18	37.9	9.5		5.5	142	0.1	0.1	3.8	1.5	0.3	5.3	91	91	141	4	34	41
OLVG010 day 0	OLVG010	day 0	baseline	Imatinib	63	Male	163	67	25.22	No		No	No	No	No	No	No	No	No	No	No	No	No	Yes	no	no	no	95	115/76	95	30	24	37.7	8.1		9.2	302	0.1	0.1	7.6	1	0.5	6	70	90	138	3.5	72	54
OLVG010 day 3	OLVG010	day 3	follow up	Imatinib	63	Male	163	67	25.22	No		No	No	No	No	No	No	No	No	No	No	No	No	Yes	no	no	no	95	115/76	95	30	24	37.7	8.1		9.2	302	0.1	0.1	7.6	1	0.5	6	70	90	138	3.5	72	54
OLVG011 day 0	OLVG011	day 0	baseline	Placebo	62	Male	198	115	29.33	Yes, former		No	No	No	No	No	No	No	Yes	No	No	No	No	Yes	no	no	no	73	127/65	100	31	22	37.2	7.4	0.38	3.5	183	0.1	0.1	2	1.2	0.3	7	115	56	137	3.7	23	19
OLVG011 day 3	OLVG011	day 3	follow up	Placebo	62	Male	198	115	29.33	Yes, former		No	No	No	No	No	No	No	Yes	No	No	No	No	Yes	no	no	no	73	127/65	100	31	22	37.2	7.4	0.38	3.5	183	0.1	0.1	2	1.2	0.3	7	115	56	137	3.7	23	19
OLVG012 day 3	OLVG012	day 3	follow up	Placebo	42	Male	183	79	23.59	No		No	No	No	No	No	No	No	No	No	No	No	No	No	no	yes	yes	69	117/72	95	26	24	37.7	7.8	0.38	5.2	240	0.1	0.1	4.4	0.8	0.1	4.5	90	80	129	3.5		35
OLVG013 day 2	OLVG013	day 2	follow up	Placebo	70	Male	165	69	25.34	No		No	Yes	No	No	No	No	No	No	No	No	No	No	Yes	no	yes	yes	68	135/75	96	30	16	36.8	8.5	0.4	7.9	203	0.1	0.1	5.6	1.8	0.5	10.7	142	43	139	4	46	29
OLVG014 day 0	OLVG014	day 0	baseline	Imatinib	65	Male	172	85.5	28.9	No		No	No	No	No	No	No	No	No	No	No	No	No	No	no	yes	yes	64	141 /84	99	70	20	36.2	6.6	0.3	8	164	0.1	0.1	6.9	0.7	0.4	3.5	64	90	133	4	40	22
OLVG014 day 3	OLVG014	day 3	follow up	Imatinib	65	Male	172	85.5	28.9	No		No	No	No	No	No	No	No	No	No	No	No	No	No	no	yes	yes	64	141 /84	99	70	20	36.2	6.6	0.3	8	164	0.1	0.1	6.9	0.7	0.4	3.5	64	90	133	4	40	22
OLVG015 day 0	OLVG015	day 0	baseline	Imatinib	61	Male	170	78	26.99	Yes, former	5	Yes	No	No	No	No	No	No	No	No	No	No	No	Yes	no	yes	yes	69	147/65	96	50	27	38	7.9		9.6	196						8.5	62	90	139	4.1	77	101
OLVG016 day 0	OLVG016	day 0	baseline	Placebo	51	Male	175	110	35.92	Not asked		No	No	No	No	No	No	No	No	No	No	No	No	Yes	no	yes	yes	78	123/64	94	85	32	36.1	9.1	0.43	12.3	378	0.1	0.1	11	1	0.2	6	79	89	130	2.9	84	65
OLVG016 day 3	OLVG016	day 3	follow up	Placebo	51	Male	175	110	35.92	Not asked		No	No	No	No	No	No	No	No	No	No	No	No	Yes	no	yes	yes	78	123/64	94	85	32	36.1	9.1	0.43	12.3	378	0.1	0.1	11	1	0.2	6	79	89	130	2.9	84	65
OLVG017 day 0	OLVG017	day 0	baseline	Imatinib	77	Male		88		Yes, former		Yes	No	No	No	No	No	No	No	No	No	No	No	No	no	yes	yes	88	107/80	97	28	18	36.5	8.6	0.41	6.7	122	0.1	0.1	5.1	0.7	0.8	3.6	77	85	133	4.4		17
OLVG017 day 3	OLVG017	day 3	follow up	Imatinib	77	Male		88		Yes, former		Yes	No	No	No	No	No	No	No	No	No	No	No	No	no	yes	yes	88	107/80	97	28	18	36.5	8.6	0.41	6.7	122	0.1	0.1	5.1	0.7	0.8	3.6	77	85	133	4.4		17
OLVG018 day 0	OLVG018	day 0	baseline	Placebo	48	Male	174	96	31.71	Yes, active	25	Yes	No	No	No	No	No	No	No	No	No	No	No	Yes	no	yes	yes	103	136/83	95	26		37	10.4	0.49	6.9	195	0.1	0.1	4.9	1.4	0.6	6.5	67	90	130	4.4	67	90
OLVG018 day 2	OLVG018	day 2	follow up	Placebo	48	Male	174	96	31.71	Yes, active	25	Yes	No	No	No	No	No	No	No	No	No	No	No	Yes	no	yes	yes	103	136/83	95	26		37	10.4	0.49	6.9	195	0.1	0.1	4.9	1.4	0.6	6.5	67	90	130	4.4	67	90
OLVG019 day 0	OLVG019	day 0	baseline	Placebo	55	Male				No		No	No	No	No	No	No	No	No	No	No	No	No	No	no	no	yes	69	138/99	94	26	20	37.5	8.8	0.43	8.8	471	0.1	0.1	6.7	1.3	0.7	8.1	87	86	138	4.3	58	90
OLVG019 day 3	OLVG019	day 3	follow up	Placebo	55	Male				No		No	No	No	No	No	No	No	No	No	No	No	No	No	no	no	yes	69	138/99	94	26	20	37.5	8.8	0.43	8.8	471	0.1	0.1	6.7	1.3	0.7	8.1	87	86	138	4.3	58	90
OLVG020 day 0	OLVG020	day 0	baseline	Imatinib	35	Male	178	103	32.51	No		No	No	No	No	No	No	No	No	No	No	No	No	No	no	no	yes	104	109/69	95	30	16	37.9	9.6	0.46	5.7	169	0.1	0.1	3.8	1.2	0.7	5.5	87	90	132	3.3	61	73
OLVG021 day 0	OLVG021	day 0	baseline	Imatinib	79	Female	175	64.8	21.16	Yes, former	37	No	Yes	Yes	No	No	No	No	No	No	No	No	No	No	no	no	yes	70	118/68	95	25	24	36.6	8.3		4.5	119	0.1	0.1	3	1	0.4	9.1	56	90	140	3.6	48	22
OLVG022 day 0	OLVG022	day 0	baseline	Placebo	82	Male	175	92.5	30.2	Yes, former		No	Yes	No	Yes	No	No	Yes	No	No	No	Yes	No	Yes	no	no	yes	101	108/55	91	64	20	36.7	6.4		17.8	430	0.1	0.1	16.6	0.6	0.5	15.7	88	70	129	4.8	66	35
OLVG022 day 3	OLVG022	day 3	follow up	Placebo	82	Male	175	92.5	30.2	Yes, former		No	Yes	No	Yes	No	No	Yes	No	No	No	Yes	No	Yes	no	no	yes	101	108/55	91	64	20	36.7	6.4		17.8	430	0.1	0.1	16.6	0.6	0.5	15.7	88	70	129	4.8	66	35
OLVG024 day 0	OLVG024	day 0	baseline	Imatinib	71	Male				Yes, active		No	Yes	Yes	No	No	No	No	No	No	No	Yes	No	Yes	no	no	yes	62	115/78	93	40	20	36.5	9.3		12.8	559						7.4	53	90	137	4.3	26	18
OLVG024 day 3	OLVG024	day 3	follow up	Imatinib	71	Male				Yes, active		No	Yes	Yes	No	No	No	No	No	No	No	Yes	No	Yes	no	no	yes	62	115/78	93	40	20	36.5	9.3		12.8	559						7.4	53	90	137	4.3	26	18
OLVG026 day 3	OLVG026	day 3	follow up	Placebo	81	Male	183	81	24.19	Yes, active		Yes	No	No	No	No	No	No	No	No	No	No	No	No	no	no	yes	64	135/77	92	26	20	37.1	8.6	0.41	10	303	0.1	0.1	8.2	1.3	0.5	6.6	66	86	133	3.6	29	25
OLVG027 day 0	OLVG027	day 0	baseline	Placebo	50	Male	152	57	24.67	No		No	No	No	No	No	No	No	No	No	No	No	No	No	no	no	yes	86	105/72	94	30	20	36.7	8		9.4	327	0.1	0.1	7.7	1.1	0.6	5.1	53	90	131	3.3	62	66
OLVG028 day 0	OLVG028	day 0	baseline	Imatinib	70	Male	172	84.3	28.5	No		No	No	No	No	No	No	No	No	No	No	No	No	Yes	no	no	yes	87	132/69	94	26	18	36.8	7.7	0.38	4	163	0.1	0.1	3.7	0.6	0.3	7.9	118	53	135	4.1		36
OLVG028 day 3	OLVG028	day 3	follow up	Imatinib	70	Male	172	84.3	28.5	No		No	No	No	No	No	No	No	No	No	No	No	No	Yes	no	no	yes	87	132/69	94	26	18	36.8	7.7	0.38	4	163	0.1	0.1	3.7	0.6	0.3	7.9	118	53	135	4.1		36
OLVG029 day 0	OLVG029	day 0	baseline	Imatinib	50	Male		87.4		No		No	Yes	No	No	No	No	No	No	No	No	Yes	Yes	Yes	no	no	yes	72	149/80	88	20	20	36.5	7.5		8	278	0.1	0.1	6.5	0.9	0.6	8.5	79	90	140	4.6	13	19
OLVG029 day 2	OLVG029	day 2	follow up	Imatinib	50	Male		87.4		No		No	Yes	No	No	No	No	No	No	No	No	Yes	Yes	Yes	no	no	yes	72	149/80	88	20	20	36.5	7.5		8	278	0.1	0.1	6.5	0.9	0.6	8.5	79	90	140	4.6	13	19
OLVG030 day 0	OLVG030	day 0	baseline	Placebo	62	Male		71.4		No		Yes	No	No	No	No	No	No	No	No	No	No	No	Yes	no	no	yes	62	116/76	94	28	20	36.4	8.6	0.42	5.4	313	0.1	0.1	4.4	0.8	0.2	9.1	92	76	135	3.8	82	61
OLVG030 day 2	OLVG030	day 2	follow up	Placebo	62	Male		71.4		No		Yes	No	No	No	No	No	No	No	No	No	No	No	Yes	no	no	yes	62	116/76	94	28	20	36.4	8.6	0.42	5.4	313	0.1	0.1	4.4	0.8	0.2	9.1	92	76	135	3.8	82	61
Rad001 day 0	Rad001	day 0	baseline	Imatinib	76	Male	180	75	23.15	Yes, former	27	No	No	No	No	No	No	No	No	Yes	No	No	No	Yes	yes	no	no	92	129/83	93	20	20	37.6	7.9	0.4	13.8	531							110	56	138	4.1	94	91
Rad001 day 3	Rad001	day 3	follow up	Imatinib	76	Male	180	75	23.15	Yes, former	27	No	No	No	No	No	No	No	No	Yes	No	No	No	Yes	yes	no	no	92	129/83	93	20	20	37.6	7.9	0.4	13.8	531							110	56	138	4.1	94	91
Rad002 day 0	Rad002	day 0	baseline	Imatinib	64	Female	165	76.1	27.95	Yes, former	15	No	No	No	No	No	No	No	No	No	No	No	No	No	yes	no	no	67	108/69	92	24	18	38.9	8.9	0.43	4.6	220	0	0.01	3.1	1.12	0.32	4.3	83	60	140	3.2	73	80
Rad003 day 0	Rad003	day 0	baseline	Placebo	66	Male	192	94	25.5	Yes, former	26	No	Yes	No	Yes	Yes	No	No	No	No	No	No	No	No	no	no	no	87	113/78	93	24	17	36.2	9	0.42	8.9	653	0.27	0.07	6.44	1.32	0.79	6.3	70	90	136	5	82	112
Rad003 day 2	Rad003	day 2	follow up	Placebo	66	Male	192	94	25.5	Yes, former	26	No	Yes	No	Yes	Yes	No	No	No	No	No	No	No	No	no	no	no	87	113/78	93	24	17	36.2	9	0.42	8.9	653	0.27	0.07	6.44	1.32	0.79	6.3	70	90	136	5	82	112
Spaarn001 day 0	Spaarn001	day 0	baseline	Imatinib	69	Male	184	114	33.67	Yes, former	30	No	No	No	Yes	No	No	No	No	No	No	No	No	No	yes	no	no	59	121/71	95	85	19	37	10	0.46	7	207	0	0	6	0.7	0.3	9.1	76	88	141	3.8	87	53
Spaarn001 day 2	Spaarn001	day 2	follow up	Imatinib	69	Male	184	114	33.67	Yes, former	30	No	No	No	Yes	No	No	No	No	No	No	No	No	No	yes	no	no	59	121/71	95	85	19	37	10	0.46	7	207	0	0	6	0.7	0.3	9.1	76	88	141	3.8	87	53
Spaarn002 day 0	Spaarn002	day 0	baseline	Placebo	61	Male	172	90	30.42	No		No	No	Yes	No	No	No	No	No	No	No	No	No	No	no	no	no	67	112/65	93	28	24	37.4	9.9	0.45	13.5	331	0	0.1	10.5	1.8	1.2	7.5	78	90	130	4.3	205	177
Spaarn002 day 3	Spaarn002	day 3	follow up	Placebo	61	Male	172	90	30.42	No		No	No	Yes	No	No	No	No	No	No	No	No	No	No	no	no	no	67	112/65	93	28	24	37.4	9.9	0.45	13.5	331	0	0.1	10.5	1.8	1.2	7.5	78	90	130	4.3	205	177
Spaarn003 day 0	Spaarn003	day 0	baseline	Imatinib	66	Male	183	95	28.37	No		No	No	No	No	No	No	No	No	No	No	No	No	No	no	no	no	70	125/68	94	35	18	37.2	8.7	0.41	10.5	200	0	0		1	0.4		72	90	140	3.2	53	43
Spaarn003 day 3	Spaarn003	day 3	follow up	Imatinib	66	Male	183	95	28.37	No		No	No	No	No	No	No	No	No	No	No	No	No	No	no	no	no	70	125/68	94	35	18	37.2	8.7	0.41	10.5	200	0	0		1	0.4		72	90	140	3.2	53	43
Spaarn004 day 0	Spaarn004	day 0	baseline	Placebo	81	Male	179	77	24.03	Yes, former	11	Yes	Yes	No	Yes	No	No	No	No	No	No	Yes	No	No	no	no	no	86	119/69	94	28	18	37.3	7.9	0.36	9.4	185	0	0	8.2	0.9	0.3		107	56	136	4.9	101	97
Spaarn004 day 3	Spaarn004	day 3	follow up	Placebo	81	Male	179	77	24.03	Yes, former	11	Yes	Yes	No	Yes	No	No	No	No	No	No	Yes	No	No	no	no	no	86	119/69	94	28	18	37.3	7.9	0.36	9.4	185	0	0	8.2	0.9	0.3		107	56	136	4.9	101	97
Spaarn005 day 0	Spaarn005	day 0	baseline	Placebo	73	Female	164	85	31.6	No		Yes	No	No	No	No	No	No	No	No	No	No	No	Yes	yes	no	no	64	102/51	93	28	22	38.4	7.6	0.34	11	231	0	0.1	9.6	0.7	0.6		95	51	128	3.8	51	36
Spaarn005 day 3	Spaarn005	day 3	follow up	Placebo	73	Female	164	85	31.6	No		Yes	No	No	No	No	No	No	No	No	No	No	No	Yes	yes	no	no	64	102/51	93	28	22	38.4	7.6	0.34	11	231	0	0.1	9.6	0.7	0.6		95	51	128	3.8	51	36
Spaarn006 day 2	Spaarn006	day 2	follow up	Imatinib	66	Male	184	94	27.76	Yes, active		Yes	No	No	No	No	No	No	No	No	No	No	No	No	yes	no	no	103	128/79	95	30	26	38.8	8.4	0.39	4.7	165	0	0	3.4	0.8	0.5	8.3	93	73	135	3.7	39	37
Spaarn008 day 0	Spaarn008	day 0	baseline	Placebo	51	Female	172	80	27.04	No		No	No	No	No	No	No	No	No	No	No	No	No	No	yes	no	no	88	120/74	94	85	28	37.8	8	0.37	11.5	211	0	0	10	1.2	0.2	3.7	78	76	136	2.9	66	44
Spaarn009 day 3	Spaarn009	day 3	follow up	Placebo	45	Male	166	67.7	24.57	Yes, former	1	No	No	No	No	No	No	No	No	No	No	No	No	No	yes	no	no	98	120/74	94	24	22	38.5	10.2	0.45	6.4	256	0	0	5.4	0.6	0.3		84	90	130	3.8	59	46
Spaarn010 day 0	Spaarn010	day 0	baseline	Imatinib	82	Female	170	69.8	24.15	No		No	No	No	No	No	No	No	No	No	No	No	No	No	yes	no	no	64	104/67	92	24	24	36.6	9.3	0.43	6.1	152	0	0	4.2	1	0.8		85	55	132	4.4	47	26
Spaarn011 day 0	Spaarn011	day 0	baseline	Imatinib	50	Male	202	109	26.71	No		No	No	No	No	No	No	No	No	No	No	No	No	No	yes	no	no	80	123/76	90	40	22	37.2	10.7	0.47	10.2	257	0	0	8.8	0.9	0.5		103	72	141	3.6	71	54
Spaarn011 day 3	Spaarn011	day 3	follow up	Imatinib	50	Male	202	109	26.71	No		No	No	No	No	No	No	No	No	No	No	No	No	No	yes	no	no	80	123/76	90	40	22	37.2	10.7	0.47	10.2	257	0	0	8.8	0.9	0.5		103	72	141	3.6	71	54
Spaarn012 day 0	Spaarn012	day 0	baseline	Imatinib	60	Male	184	90.3	26.67	No		No	No	No	No	No	No	No	No	No	No	No	No	No	yes	no	yes	73	107/63	94	40	36	37.5	8.8	0.41	9.6	172	0	0	8.6	0.6	0.4		97	72	139	3.7	35	30
Spaarn012 day 3	Spaarn012	day 3	follow up	Imatinib	60	Male	184	90.3	26.67	No		No	No	No	No	No	No	No	No	No	No	No	No	No	yes	no	yes	73	107/63	94	40	36	37.5	8.8	0.41	9.6	172	0	0	8.6	0.6	0.4		97	72	139	3.7	35	30
Spaarn013 day 2	Spaarn013	day 2	follow up	Imatinib	50	Male	182	83.5	25.21	Yes, former	80	No	No	No	No	No	No	No	No	No	No	No	No	No	yes	no	no	103	151/91	92	32	27	36.6	9.8	0.44	4.3	209	0	0	3.4	0.6	0.3		70	90	136	3.8	56	39
Spaarn014 day 3	Spaarn014	day 3	follow up	Placebo	59	Male	193	114	30.6	No		No	Yes	No	No	No	No	No	No	No	No	Yes	No	Yes	yes	no	yes	96	147/87	92	40	20	38.9	9.3	0.41	7.6	281	0	0	5.8	0.8	1		91	79	138	3.3	36	40
Spaarn015 day 3	Spaarn015	day 3	follow up	Placebo	66	Male	196	132	34.36	Yes, former		Yes	Yes	No	No	No	Yes	No	No	No	No	No	No	Yes	yes	no	no	64	128/65	93	32	30	37	8.9	0.42	5.9	160	0	0	4.1	1	0.7		155	40	137	4.8	28	21
Spaarn017 day 0	Spaarn017	day 0	baseline	Imatinib	59	Male	189	88	24.64	No		No	No	No	No	No	No	No	No	No	No	No	No	No	yes	no	no	65	108/68	99	30	20	37.5	8	0.38	4.8	210	0	0	4	0.5	0.3		61	90	137	3.8	29	26
Spaarn017 day 3	Spaarn017	day 3	follow up	Imatinib	59	Male	189	88	24.64	No		No	No	No	No	No	No	No	No	No	No	No	No	No	yes	no	no	65	108/68	99	30	20	37.5	8	0.38	4.8	210	0	0	4	0.5	0.3		61	90	137	3.8	29	26
Spaarn018 day 3	Spaarn018	day 3	follow up	Placebo	59	Male	185	82.1	23.99	No		Yes	No	No	No	No	No	No	No	No	No	Yes	No	No	yes	no	no	76	132/84	97	24	18	37.3	7.8	0.38	5.7	227	0	0	4.6	0.6	0.5		81	90	138	4	26	27
Spaarn019 day 0	Spaarn019	day 0	baseline	Imatinib	58	Female	163	68	25.59	No		No	No	No	No	No	No	No	No	No	No	No	No	No	yes	no	no	109	144/84	97	26	18	40.1	8.8	0.39	4.8	221	0	0	3.4	1	0.4		69	84	137	3.1	47	32
Spaarn021 day 0	Spaarn021	day 0	baseline	Imatinib	37	Male	169	82.5	28.89	No		No	No	No	No	No	No	No	No	No	No	No	No	No	no	no	no	73	114/71	96	60	28	36.8	7.8	0.35	13.6	237	0	0	12.6	0.7	0.3		88	90	135	3.9		48
Spaarn022 day 0	Spaarn022	day 0	baseline	Placebo	49	Male	192	102	27.67	No		No	No	No	Yes	No	Yes	No	No	No	No	No	No	No	no	no	no	80	124/75	91	20	15	37.4	8.7	0.39	4	102	0	0	2.6	0.9	0.4		81	90	136	3.5		45
Spaarn022 day 3	Spaarn022	day 3	follow up	Placebo	49	Male	192	102	27.67	No		No	No	No	Yes	No	Yes	No	No	No	No	No	No	No	no	no	no	80	124/75	91	20	15	37.4	8.7	0.39	4	102	0	0	2.6	0.9	0.4		81	90	136	3.5		45
Spaarn023 day 2	Spaarn023	day 2	follow up	Placebo	58	Male	177	93	29.68	Yes, former	30	No	No	No	No	No	No	No	No	No	No	No	No	No	no	no	yes	75	155/71	94	85	40	38.1	8.3	0.4	17.3	499	0	0.1	15.4	1.4	0.5	5.6	51	90	139	4.1	25	41
Spaarn025 day 0	Spaarn025	day 0	baseline	Imatinib	60	Female	174	116	38.31	No		No	No	Yes	No	No	No	No	No	No	No	No	No	No	no	yes	yes	52	107/71	96	24		36.2	8.6	0.39	4.3	178	0	0	2.7	0.9	0.7		68	84	137	4		32
Spaarn025 day 3	Spaarn025	day 3	follow up	Imatinib	60	Female	174	116	38.31	No		No	No	Yes	No	No	No	No	No	No	No	No	No	No	no	yes	yes	52	107/71	96	24		36.2	8.6	0.39	4.3	178	0	0	2.7	0.9	0.7		68	84	137	4		32
Spaarn029 day 0	Spaarn029	day 0	baseline	Placebo	59	Female	178	121.8	38.44	No		No	No	Yes	No	No	No	No	No	No	No	No	No	Yes	no	yes	no	86	130/85	95	24	24	37.2	7.7	0.37	9.3	153	0	0	7	1.6	0.6		71	80	140	3.6	27	29
Spaarn030 day 0	Spaarn030	day 0	baseline	Imatinib	57	Female	167	139.5	50.02	Yes, former	8	Yes	No	No	No	No	No	No	Yes	No	No	Yes	No	Yes	no	yes	yes	85	108/78	94	35	18	36.4	8	0.38	10.8	320	0	0	9.8	0.5	0.4		109	48	139	4.2		29
Spaarn032 day 0	Spaarn032	day 0	baseline	Placebo	68	Male	180	87	26.85	Yes, former	30	No	No	No	No	No	No	No	No	No	No	No	No	Yes	no	yes	yes	50	95/51	93	26	16	35.7	9.6	0.46	17.6	277	0	0	14.8	1.5	1.3		94	71	140	4.3	27	34
Spaarn033 day 0	Spaarn033	day 0	baseline	Placebo	77	Male	180	88	27.16	Yes, former	15	No	Yes	No	Yes	No	No	No	No	No	No	Yes	No	No	no	yes	yes	67	133/74	90	85	24	37.7	9.5	0.43	4.5	144	0	0	3.9	0.4	0.2	10.4	92	69	134	4.4	42	27
Spaarn035 day 0	Spaarn035	day 0	baseline	Placebo	36	Male	175	94	30.69	Yes, former	3	No	No	No	No	No	No	No	No	No	No	No	No	No	no	no	yes	95	123/65	87	30	18	37	9.7	0.43	6.2	201	0	0.1	3.8	1.9	0.4	3.4	68	90	137	3.8	27	55
Spaarn036 day 0	Spaarn036	day 0	baseline	Imatinib	76	Female	171	108	36.93	Yes, former	20	No	Yes	Yes	No	Yes	No	No	No	No	No	No	No	Yes	no	no	no	90	151/67	90	20	16	37	6.6	0.32	7.4	229	0	0	6.4	0.6	0.3	5.9	79	63	141	3.8	27	43
Spaarn037 day 0	Spaarn037	day 0	baseline	Imatinib	64	Male	172	86.7	29.31	Yes, former	15	No	No	No	No	No	No	No	No	No	No	No	No	Yes	no	no	yes	71	111/71	88	85	26	37.5	9.8	0.44	6.8	143	0	0	2.5	0.9	0.4	6.7	73	90	137	3.8	30	20
Spaarn039 day 0	Spaarn039	day 0	baseline	Placebo	64	Male	176	85	27.44	Not applicable		No	No	No	No	No	No	No	No	No	No	No	No	No	no	yes	yes	74	144/79	95	40	16	36.4	8.8	0.41	8.7	274	0	0	7.5	0.6	0.6		70	90	140	3.5	73	43
Spaarn040 day 0	Spaarn040	day 0	baseline	Imatinib	61	Female	180	100.7	31.08	Yes, former	20	No	No	No	No	No	No	No	No	No	No	No	No	Yes	no	no	yes	79	133/82	96	60	20	37.2	7.1	0.33	6.6	258	0	0	4.3	1.8	0.4	5.8	58	90	140	3.6	52	49
Spaarn052 day 0	Spaarn052	day 0	baseline	Imatinib	68	Male	164	66	24.54	No		Yes	No	Yes	No	No	No	No	No	Yes	No	Yes	No	Yes	no	no	yes	83	154/91	93	24	21	36	8.6	0.4	13.8	341	0	0	12.6	0.4	0.7	14.3	125	51	136	4.4	80	99
Spaarn052 day 3	Spaarn052	day 3	follow up	Imatinib	68	Male	164	66	24.54	No		Yes	No	Yes	No	No	No	No	No	Yes	No	Yes	No	Yes	no	no	yes	83	154/91	93	24	21	36	8.6	0.4	13.8	341	0	0	12.6	0.4	0.7	14.3	125	51	136	4.4	80	99
Spaarn053 day 0	Spaarn053	day 0	baseline	Placebo	61	Male	176	80	25.83	Yes, former	20	Yes	No	No	No	No	No	No	No	No	No	No	No	Yes	no	no	yes	88	148/70	95	26	22	36.7	9.5	0.44	7.1	585						9	75	90	132	4.8	17	33
Spaarn053 day 2	Spaarn053	day 2	follow up	Placebo	61	Male	176	80	25.83	Yes, former	20	Yes	No	No	No	No	No	No	No	No	No	No	No	Yes	no	no	yes	88	148/70	95	26	22	36.7	9.5	0.44	7.1	585						9	75	90	132	4.8	17	33
Spaarn054 day 0	Spaarn054	day 0	baseline	Placebo	51	Female	161	98	37.81	No		No	No	No	No	No	No	No	No	No	No	No	No	Yes	no	no	yes	90	119/83	94	30	16	36.7	9.1	0.42	8.9	414	0	0	7.8	0.7	0.4	7.6	59	90	139	3.3	66	53
Spaarn054 day 3	Spaarn054	day 3	follow up	Placebo	51	Female	161	98	37.81	No		No	No	No	No	No	No	No	No	No	No	No	No	Yes	no	no	yes	90	119/83	94	30	16	36.7	9.1	0.42	8.9	414	0	0	7.8	0.7	0.4	7.6	59	90	139	3.3	66	53
Spaarn055 day 0	Spaarn055	day 0	baseline	Imatinib	51	Male	172	69.8	23.59	No		No	No	No	No	No	No	No	No	No	No	No	No	No	no	no	yes	88	95/63	95	26	16	36.5	8.9	0.43	15	479	0.1	0	12.3	1.6	1	8.5	67	90	141	4.2	15	22
Spaarn055 day 3	Spaarn055	day 3	follow up	Imatinib	51	Male	172	69.8	23.59	No		No	No	No	No	No	No	No	No	No	No	No	No	No	no	no	yes	88	95/63	95	26	16	36.5	8.9	0.43	15	479	0.1	0	12.3	1.6	1	8.5	67	90	141	4.2	15	22
Spaarn056 day 0	Spaarn056	day 0	baseline	Placebo	70	Male	175	72.1	23.54	Yes, former	25	No	No	No	No	No	No	No	No	No	No	Yes	No	Yes	no	no	yes	75	136/72	95	28	20	35.8	9	0.43	8.6	414	0	0	7.3	0.8	0.5	7.7	71	90	132	4.6	26	21
Spaarn056 day 3	Spaarn056	day 3	follow up	Placebo	70	Male	175	72.1	23.54	Yes, former	25	No	No	No	No	No	No	No	No	No	No	Yes	No	Yes	no	no	yes	75	136/72	95	28	20	35.8	9	0.43	8.6	414	0	0	7.3	0.8	0.5	7.7	71	90	132	4.6	26	21
Spaarn057 day 0	Spaarn057	day 0	baseline	Placebo	83	Male	172	88	29.75	Yes, former	40	No	No	Yes	No	No	No	No	No	No	No	Yes	No	Yes	no	yes	yes	84	95/51	96	24	20	36.8	8.9	0.4	10.2	223	0	0	9.1	0.5	0.6	10.2	108	54	130	3.9	33	33
Spaarn057 day 3	Spaarn057	day 3	follow up	Placebo	83	Male	172	88	29.75	Yes, former	40	No	No	Yes	No	No	No	No	No	No	No	Yes	No	Yes	no	yes	yes	84	95/51	96	24	20	36.8	8.9	0.4	10.2	223	0	0	9.1	0.5	0.6	10.2	108	54	130	3.9	33	33
Spaarn058 day 0	Spaarn058	day 0	baseline	Placebo	65	Male	180	115.4	35.62	No		Yes	No	No	No	No	No	No	No	No	No	No	No	Yes	no	yes	yes	57	116/75	98	26	22	36.6	8.9	0.4	5.7	159	0	0	3.7	1.6	0.4	9.9	72	90	138	3.4	61	76
Spaarn058 day 2	Spaarn058	day 2	follow up	Placebo	65	Male	180	115.4	35.62	No		Yes	No	No	No	No	No	No	No	No	No	No	No	Yes	no	yes	yes	57	116/75	98	26	22	36.6	8.9	0.4	5.7	159	0	0	3.7	1.6	0.4	9.9	72	90	138	3.4	61	76
Spaarn059 day 0	Spaarn059	day 0	baseline	Imatinib	62	Male	173	103.7	34.65	No		No	No	No	No	No	No	No	No	No	No	No	No	No	no	no	yes	78	125/72	94	30	24	37.1	9.5	0.45	7.1	256	0	0	6	0.6	0.5	4.6	67	90	134	4.2	35	30
Spaarn059 day 3	Spaarn059	day 3	follow up	Imatinib	62	Male	173	103.7	34.65	No		No	No	No	No	No	No	No	No	No	No	No	No	No	no	no	yes	78	125/72	94	30	24	37.1	9.5	0.45	7.1	256	0	0	6	0.6	0.5	4.6	67	90	134	4.2	35	30
Spaarn060 day 0	Spaarn060	day 0	baseline	Imatinib	78	Male	178	85.2	26.89	Yes, former		No	No	Yes	Yes	No	No	No	No	No	No	No	No	No	no	no	yes	82	117/70	92	30	24	36.4	9.6	0.44	7.6	444	0	0	6.5	0.6	0.5	7	68	87	135	3.8	46	42
Spaarn060 day 3	Spaarn060	day 3	follow up	Imatinib	78	Male	178	85.2	26.89	Yes, former		No	No	Yes	Yes	No	No	No	No	No	No	No	No	No	no	no	yes	82	117/70	92	30	24	36.4	9.6	0.44	7.6	444	0	0	6.5	0.6	0.5	7	68	87	135	3.8	46	42
Spaarn061 day 0	Spaarn061	day 0	baseline	Imatinib	81	Male	171	71.1	24.32	Yes, former		No	No	No	No	No	No	No	No	No	No	No	No	No	no	no	yes	73	139/75	92	30	24	36.7	7.8	0.37	6.5	541	0	0	4.6	1.2	0.6	7.6	70	84	135	3.7	56	85
Spaarn061 day 3	Spaarn061	day 3	follow up	Imatinib	81	Male	171	71.1	24.32	Yes, former		No	No	No	No	No	No	No	No	No	No	No	No	No	no	no	yes	73	139/75	92	30	24	36.7	7.8	0.37	6.5	541	0	0	4.6	1.2	0.6	7.6	70	84	135	3.7	56	85
Spaarn062 day 0	Spaarn062	day 0	baseline	Imatinib	61	Male	182	90.9	27.44	No		No	Yes	No	No	No	No	No	No	No	No	No	No	Yes	no	no	yes	78	111/71	99	28	18	36.2	9.1	0.45	11.9	246	0	0	10.8	0.6	0.4	7.5	60	90	136	3.2	23	20
Spaarn063 day 0	Spaarn063	day 0	baseline	Imatinib	78	Male	183	80	23.89	Yes, former	60	No	No	No	No	No	No	No	No	No	No	No	No	Yes	no	no	yes	81	115/63	95	28	24	38.2	7.6	0.36	5.8	167	0	0	5	0.5	0.3		134	43	136	3.3	44	37
Spaarn063 day 3	Spaarn063	day 3	follow up	Imatinib	78	Male	183	80	23.89	Yes, former	60	No	No	No	No	No	No	No	No	No	No	No	No	Yes	no	no	yes	81	115/63	95	28	24	38.2	7.6	0.36	5.8	167	0	0	5	0.5	0.3		134	43	136	3.3	44	37
Spaarn064 day 0	Spaarn064	day 0	baseline	Placebo	84	Female	159	65	25.71	Yes, former	5	Yes	Yes	No	Yes	Yes	No	No	Yes	No	No	Yes	No	Yes	no	no	yes	76	127/70	90	85	24	36.1	7.5	0.35	6.3	249	0	0	5.6	0.4	0.2	11.1	64	76	137	4.3	50	18
Spaarn065 day 0	Spaarn065	day 0	baseline	Placebo	65	Female	161	96	37.04	Yes, former	45	Yes	No	No	No	No	No	No	No	No	No	Yes	No	No	no	no	yes	101	160/69	95	85	32	40.1	7.3	0.35	17.2	254	0	0	15.5	1	0.7	6.9	75	72	137	4.6	33	19
Spaarn065 day 3	Spaarn065	day 3	follow up	Placebo	65	Female	161	96	37.04	Yes, former	45	Yes	No	No	No	No	No	No	No	No	No	Yes	No	No	no	no	yes	101	160/69	95	85	32	40.1	7.3	0.35	17.2	254	0	0	15.5	1	0.7	6.9	75	72	137	4.6	33	19
Spaarn066 day 0	Spaarn066	day 0	baseline	Placebo	83	Male	167	70	25.1	No		Yes	No	Yes	No	No	No	No	No	No	No	No	No	No	no	no	yes	82	128/68	93	35	28	36.3	8.1	0.37	7.1	234	0	0	4.4	2	0.6	7.3	56	90	125	4.2	30	25
Spaarn066 day 3	Spaarn066	day 3	follow up	Placebo	83	Male	167	70	25.1	No		Yes	No	Yes	No	No	No	No	No	No	No	No	No	No	no	no	yes	82	128/68	93	35	28	36.3	8.1	0.37	7.1	234	0	0	4.4	2	0.6	7.3	56	90	125	4.2	30	25
Spaarn067 day 0	Spaarn067	day 0	baseline	Placebo	62	Male	184	113	33.38	Yes, former	60	No	Yes	Yes	No	Yes	No	No	No	No	No	No	No	Yes	no	no	yes	124	114/72	90	85	20	36.8	9.1	0.44	4.5	139	0	0	2.8	1	0.7	11.5	152	42	133	4.4	58	34
Spaarn067 day 3	Spaarn067	day 3	follow up	Placebo	62	Male	184	113	33.38	Yes, former	60	No	Yes	Yes	No	Yes	No	No	No	No	No	No	No	Yes	no	no	yes	124	114/72	90	85	20	36.8	9.1	0.44	4.5	139	0	0	2.8	1	0.7	11.5	152	42	133	4.4	58	34
Spaarn068 day 0	Spaarn068	day 0	baseline	Imatinib	53	Male	170	84	29.07	No		Yes	No	No	No	No	No	No	No	No	No	No	No	Yes	no	no	yes	124	166/89	93	35	22	37.8	8.6	0.43	8.9	247	0	0	8.1	0.3	0.4	5	62	90	133	4.1	113	109
Spaarn068 day 2	Spaarn068	day 2	follow up	Imatinib	53	Male	170	84	29.07	No		Yes	No	No	No	No	No	No	No	No	No	No	No	Yes	no	no	yes	124	166/89	93	35	22	37.8	8.6	0.43	8.9	247	0	0	8.1	0.3	0.4	5	62	90	133	4.1	113	109
Spaarn069 day 0	Spaarn069	day 0	baseline	Imatinib	69	Female	168	94	33.3	No		Yes	No	No	No	No	No	No	No	No	No	No	No	Yes	no	no	yes	87	118/75	95	35	24	37.6	8.6	0.39	14.9	283	0	0	13.1	1.1	0.7	4.2	55	90	133	3.2	32	24
Spaarn070 day 0	Spaarn070	day 0	baseline	Imatinib	78	Male	176	75	24.21	Yes, former	50	No	No	No	No	No	No	No	No	No	No	No	No	Yes	no	no	yes	120	151/93	89	60	28	36.3	8.3	0.41	5	129	0	0.1	4.5	0.2	0.2	9	78	82	147	3.7	48	14
Spaarn071 day 0	Spaarn071	day 0	baseline	Placebo	70	Male	185	69	20.16	Yes, former		No	No	No	No	No	No	No	Yes	No	No	No	No	No	no	no	yes	99	108/70	87	85	38	37.2	8.4	0.41	5.4	223	0	0	4.4	0.4	0.6	7.4	94	70	136	4.1	49	32
Spaarn071 day 3	Spaarn071	day 3	follow up	Placebo	70	Male	185	69	20.16	Yes, former		No	No	No	No	No	No	No	Yes	No	No	No	No	No	no	no	yes	99	108/70	87	85	38	37.2	8.4	0.41	5.4	223	0	0	4.4	0.4	0.6	7.4	94	70	136	4.1	49	32
Spaarn072 day 0	Spaarn072	day 0	baseline	Placebo	57	Male	176	102	32.93	No		Yes	No	No	No	No	No	No	No	No	No	No	No	No	no	no	yes	82	152/92	95	24	20	37.4	9.2	0.44	9.2	265	0	0	7.5	1	0.7	8.5	73	90	139	4.9	35	42
Spaarn072 day 3	Spaarn072	day 3	follow up	Placebo	57	Male	176	102	32.93	No		Yes	No	No	No	No	No	No	No	No	No	No	No	No	no	no	yes	82	152/92	95	24	20	37.4	9.2	0.44	9.2	265	0	0	7.5	1	0.7	8.5	73	90	139	4.9	35	42
Spaarn073 day 0	Spaarn073	day 0	baseline	Placebo	78	Male	178	80	25.25	Not asked		No	No	No	Yes	Yes	Yes	No	No	No	No	Yes	No	Yes	no	no	yes	66	156/86	96	28	24	35	8.8	0.4	7.3	180	0.1	0.02	6.1	0.9	0.16	5.2	62	90	139	3.3	32	17
Spaarn073 day 3	Spaarn073	day 3	follow up	Placebo	78	Male	178	80	25.25	Not asked		No	No	No	Yes	Yes	Yes	No	No	No	No	Yes	No	Yes	no	no	yes	66	156/86	96	28	24	35	8.8	0.4	7.3	180	0.1	0.02	6.1	0.9	0.16	5.2	62	90	139	3.3	32	17
Spaarn074 day 0	Spaarn074	day 0	baseline	Imatinib	72	Male	180	80	24.69	Yes, former	20	No	No	Yes	No	No	No	No	No	No	No	No	No	No	no	no	yes	59	144/81	96	28	18	36.2	9.4	0.45	5.3	183	0	0	4.1	0.7	0.5	8.8	88	75	137	4.6	40	41
Spaarn074 day 3	Spaarn074	day 3	follow up	Imatinib	72	Male	180	80	24.69	Yes, former	20	No	No	Yes	No	No	No	No	No	No	No	No	No	No	no	no	yes	59	144/81	96	28	18	36.2	9.4	0.45	5.3	183	0	0	4.1	0.7	0.5	8.8	88	75	137	4.6	40	41
Spaarn075 day 0	Spaarn075	day 0	baseline	Imatinib	85	Female	162	67	25.53	No		No	Yes	No	Yes	Yes	No	No	No	No	No	Yes	No	Yes	no	no	yes	75	162/86	92	60	22	36.2	8.8	0.42	9.8	291	0	0.1	8.2	1.1	0.4	7.2	59	80	137	3	70	20
Spaarn075 day 2	Spaarn075	day 2	follow up	Imatinib	85	Female	162	67	25.53	No		No	Yes	No	Yes	Yes	No	No	No	No	No	Yes	No	Yes	no	no	yes	75	162/86	92	60	22	36.2	8.8	0.42	9.8	291	0	0.1	8.2	1.1	0.4	7.2	59	80	137	3	70	20
Spaarn077 day 0	Spaarn077	day 0	baseline	Placebo	56	Male	184	110	32.49	No		No	No	No	No	No	No	No	No	No	No	No	No	No	no	no	yes	82	141/88	92	40	22	36.8	9.4	0.44	18.5	300	0	0	16.4	1.3	0.8	6.9	72	90	137	4.2	66	75
Spaarn077 day 3	Spaarn077	day 3	follow up	Placebo	56	Male	184	110	32.49	No		No	No	No	No	No	No	No	No	No	No	No	No	No	no	no	yes	82	141/88	92	40	22	36.8	9.4	0.44	18.5	300	0	0	16.4	1.3	0.8	6.9	72	90	137	4.2	66	75
Spaarn078 day 0	Spaarn078	day 0	baseline	Imatinib	58	Female	168	100	35.43	No		Yes	No	No	No	No	No	No	No	No	No	No	No	No	no	no	yes	98	114/74	91	60	24	38	8.4	0.4	7.7	108	0	0	6.3	0.9	0.5	6.6	72	80	131	3.7	39	32
Spaarn078 day 3	Spaarn078	day 3	follow up	Imatinib	58	Female	168	100	35.43	No		Yes	No	No	No	No	No	No	No	No	No	No	No	No	no	no	yes	98	114/74	91	60	24	38	8.4	0.4	7.7	108	0	0	6.3	0.9	0.5	6.6	72	80	131	3.7	39	32
Spaarn079 day 0	Spaarn079	day 0	baseline	Placebo	77	Male	178	81	25.56	No		No	No	No	No	No	No	No	No	No	No	No	No	No	no	no	yes	71	134/72	97	60	19	35.6	8.6	0.4	12.5	389	0	0	11.7	0.5	0.2	8.8	80	81	132	3.8	49	63
Spaarn080 day 0	Spaarn080	day 0	baseline	Imatinib	76	Female	172	92	31.1	No		No	No	No	Yes	No	No	No	No	No	No	No	No	Yes	no	no	yes	78	115/64	91	40	14	36.9	8	0.39	8.2	303	0	0	6.7	1.1	0.4	6.2	60	85	136	3.8	68	33
Spaarn080 day 2	Spaarn080	day 2	follow up	Imatinib	76	Female	172	92	31.1	No		No	No	No	Yes	No	No	No	No	No	No	No	No	Yes	no	no	yes	78	115/64	91	40	14	36.9	8	0.39	8.2	303	0	0	6.7	1.1	0.4	6.2	60	85	136	3.8	68	33
Spaarn081 day 3	Spaarn081	day 3	follow up	Placebo	74	Male	186	82	23.7	Yes, former		No	No	No	No	No	No	No	No	No	No	No	No	No	no	no	yes	76	108/67	93	85	28	35.4	9.4	0.42	15.5	267	0	0	14.3	0.6	0.6	11.5	70	88	145	3.1	59	42
Spaarn082 day 0	Spaarn082	day 0	baseline	Imatinib	60	Male	178	117	36.93	No		No	No	No	No	Yes	No	No	No	No	No	No	No	No	no	no	yes	73	128/75	95	40	24	36.8	8.9	0.4	5.6	193	0	0	4.5	0.6	0.6	4.7	81	90	135	3.6	47	34
Spaarn082 day 2	Spaarn082	day 2	follow up	Imatinib	60	Male	178	117	36.93	No		No	No	No	No	Yes	No	No	No	No	No	No	No	No	no	no	yes	73	128/75	95	40	24	36.8	8.9	0.4	5.6	193	0	0	4.5	0.6	0.6	4.7	81	90	135	3.6	47	34
Spaarn083 day 3	Spaarn083	day 3	follow up	Imatinib	72	Male	180	82	25.31	Yes, former	5	No	No	No	No	No	No	No	No	No	No	No	No	No	no	no	yes	141	135/86	95	26	24	37.2	9.6	0.43	15.6	182	0	0	14	0.5	1.2		97	67	133	3.3	40	42
Spaarn084 day 3	Spaarn084	day 3	follow up	Placebo	78	Male	174	89	29.4	No		Yes	No	No	Yes	No	No	No	No	No	No	No	No	Yes	no	no	yes	84	133/84	87	85	22	37.2	9.7	0.45	8.6	180	0	0	7.8	0.5	0.2	6.3	80	81	133	4.3	61	35
Spaarn085 day 0	Spaarn085	day 0	baseline	Placebo	82	Male	174	90	29.73	Yes, former	12	Yes	No	No	Yes	No	No	No	No	No	No	No	No	No	no	no	yes	51	132/60	95	60	17	37.6	6.8	0.3	4.2	138	0	0	3.4	0.4	0.3	8.3	92	66	125	4	49	28
Spaarn085 day 3	Spaarn085	day 3	follow up	Placebo	82	Male	174	90	29.73	Yes, former	12	Yes	No	No	Yes	No	No	No	No	No	No	No	No	No	no	no	yes	51	132/60	95	60	17	37.6	6.8	0.3	4.2	138	0	0	3.4	0.4	0.3	8.3	92	66	125	4	49	28
VUMC001 day 0	VUMC001	day 0	baseline	Imatinib	71	Male	176	75	24.21	Yes, former		No	No	No	No	No	No	No	No	No	No	No	No	No	no	no	no	88	133/69	91	26	20	38.1	8.8	0.42	5.3	165	0	0	4.44	0.62	0.21	3.7	67	90	131	3.7	58	39
VUMC001 day 3	VUMC001	day 3	follow up	Imatinib	71	Male	176	75	24.21	Yes, former		No	No	No	No	No	No	No	No	No	No	No	No	No	no	no	no	88	133/69	91	26	20	38.1	8.8	0.42	5.3	165	0	0	4.44	0.62	0.21	3.7	67	90	131	3.7	58	39
VUMC002 day 0	VUMC002	day 0	baseline	Imatinib	71	Male	170	102	35.29	No		Yes	No	No	No	No	No	No	No	Yes	No	No	No	Yes	no	no	no	64	136/82	93	32	32	37.3	7.8	0.38	4.6	203	0	0	3.68	0.57	0.11	10.7	131	47	137	3.4	70	55
VUMC002 day 2	VUMC002	day 2	follow up	Imatinib	71	Male	170	102	35.29	No		Yes	No	No	No	No	No	No	No	Yes	No	No	No	Yes	no	no	no	64	136/82	93	32	32	37.3	7.8	0.38	4.6	203	0	0	3.68	0.57	0.11	10.7	131	47	137	3.4	70	55
VUMC003 day 0	VUMC003	day 0	baseline	Placebo	80	Male	176	85	27.44	No		Yes	Yes	Yes	No	No	No	No	No	No	No	No	No	No	no	no	no	70	127/70	92	24	20	35.7	7.7	0.39	8.2	199	0	0.02	7.41	0.2	0.41	14	112	53	144	4.3	22	15
VUMC003 day 2	VUMC003	day 2	follow up	Placebo	80	Male	176	85	27.44	No		Yes	Yes	Yes	No	No	No	No	No	No	No	No	No	No	no	no	no	70	127/70	92	24	20	35.7	7.7	0.39	8.2	199	0	0.02	7.41	0.2	0.41	14	112	53	144	4.3	22	15
VUMC004 day 0	VUMC004	day 0	baseline	Placebo	80	Male	180	75	23.15	Yes, former	1	Yes	Yes	Yes	No	No	No	No	No	No	No	No	No	No	no	no	no	88	126/77	92	26	24	36.4	8.5	0.42	5.4	160	0.01	0	4.37	0.73	0.3	11.5	78	81	139	4.7	71	81
VUMC004 day 3	VUMC004	day 3	follow up	Placebo	80	Male	180	75	23.15	Yes, former	1	Yes	Yes	Yes	No	No	No	No	No	No	No	No	No	No	no	no	no	88	126/77	92	26	24	36.4	8.5	0.42	5.4	160	0.01	0	4.37	0.73	0.3	11.5	78	81	139	4.7	71	81
VUMC005 day 0	VUMC005	day 0	baseline	Placebo	49	Male	185	90	26.3	Yes, active		Yes	No	No	No	No	No	No	No	No	No	No	No	No	no	no	no	106	123/81	89	30	32	38.6	7.4	0.36	6.2	331	0	0.01	4.85	0.88	0.4	3.7	55	90	135	4.2	99	42
VUMC005 day 3	VUMC005	day 3	follow up	Placebo	49	Male	185	90	26.3	Yes, active		Yes	No	No	No	No	No	No	No	No	No	No	No	No	no	no	no	106	123/81	89	30	32	38.6	7.4	0.36	6.2	331	0	0.01	4.85	0.88	0.4	3.7	55	90	135	4.2	99	42
VUMC006 day 0	VUMC006	day 0	baseline	Imatinib	52	Male	188	94	26.6	No		No	No	No	No	No	No	No	No	No	No	No	No	No	no	no	no	71	137/83	92	24	18	37.5	7.4	0.36	5.7	352	0.14	0.03	4.58	0.54	0.37	4.2	81	90	139	3.8	55	59
VUMC007 day 0	VUMC007	day 0	baseline	Imatinib	40	Female	150	90	40	No		Yes	No	No	No	No	No	No	No	No	No	No	No	No	no	no	no	86	128/73	94	24	16	36.4	9.2	0.43	4.7	180	0.01	0.01	2.09	2.1	0.49	3.8	48	90	141	3.4	30	31
VUMC008 day 0	VUMC008	day 0	baseline	Placebo	56	Female	168	85	30.12	No		No	No	No	No	No	No	No	No	No	No	No	No	No	no	no	no	78	120/76	91	30	30	39.3	8.6	0.42	7.1	238	0.03	0.03	5.64	0.95	0.37	2.8	38	90	137	3.5	87	48
VUMC009 day 0	VUMC009	day 0	baseline	Imatinib	71	Female	165			No		No	No	No	No	No	No	No	No	No	No	No	No	Yes	no	no	no	97	119/71	94	32	30	38.5	8.7	0.43	10.5	366	0	0.02	9.07	0.97	0.36	8.5	60	88	149	2.9	61	48
VUMC009 day 3	VUMC009	day 3	follow up	Imatinib	71	Female	165			No		No	No	No	No	No	No	No	No	No	No	No	No	Yes	no	no	no	97	119/71	94	32	30	38.5	8.7	0.43	10.5	366	0	0.02	9.07	0.97	0.36	8.5	60	88	149	2.9	61	48
VUMC010 day 0	VUMC010	day 0	baseline	Placebo	49	Male	175	100	32.65	No		No	No	Yes	No	No	No	No	No	No	No	No	No	No	no	no	no	86	141/81	91	24	15	37.4	9.6	0.44	60.4	163						6	91		139	4.3	59	64
VUMC011 day 0	VUMC011	day 0	baseline	Imatinib	77	Male	189	85	23.8	No		No	Yes	No	No	No	No	No	No	No	No	No	No	No	no	no	no	99	162/88	94	26	19	38.4	8.4	0.41	9.4	270	0	0.02	8.18	0.82	0.32	6.6	113	53	137	3.9	37	27
VUMC011 day 3	VUMC011	day 3	follow up	Imatinib	77	Male	189	85	23.8	No		No	Yes	No	No	No	No	No	No	No	No	No	No	No	no	no	no	99	162/88	94	26	19	38.4	8.4	0.41	9.4	270	0	0.02	8.18	0.82	0.32	6.6	113	53	137	3.9	37	27
VUMC012 day 0	VUMC012	day 0	baseline	Placebo	75	Male	175	85	27.76	Yes, active	0.5	No	No	No	No	No	No	No	No	No	No	No	No	Yes	no	no	no	84	167/81	94	85	26	37.4	9.6	0.47	5.7	133	0	0.02	5.13	0.25	0.24	5	59	90	139	3.5	42	29
VUMC012 day 3	VUMC012	day 3	follow up	Placebo	75	Male	175	85	27.76	Yes, active	0.5	No	No	No	No	No	No	No	No	No	No	No	No	Yes	no	no	no	84	167/81	94	85	26	37.4	9.6	0.47	5.7	133	0	0.02	5.13	0.25	0.24	5	59	90	139	3.5	42	29
VUMC014 day 0	VUMC014	day 0	baseline	Imatinib	67	Male	178	81	25.56	No		No	Yes	No	No	Yes	No	No	No	No	No	No	No	Yes	no	no	no	82	116/66	94	32	20	38.4	8	0.38	4.6	327	0.1	0.01	3.48	0.54	0.39	4.5	82	85	139	4.3	36	24
VUMC014 day 3	VUMC014	day 3	follow up	Imatinib	67	Male	178	81	25.56	No		No	Yes	No	No	Yes	No	No	No	No	No	No	No	Yes	no	no	no	82	116/66	94	32	20	38.4	8	0.38	4.6	327	0.1	0.01	3.48	0.54	0.39	4.5	82	85	139	4.3	36	24
VUMC015 day 0	VUMC015	day 0	baseline	Placebo	47	Male	173	80	26.73	Yes, former		No	Yes	No	No	No	No	No	No	No	No	No	No	No	no	no	no	65	101/56	97	24	14	36	8.8	0.46	6.8	235	0	0.01	5.07	1.09	0.58	4.2	72	90	137	3.9	27	31
VUMC015 day 2	VUMC015	day 2	follow up	Placebo	47	Male	173	80	26.73	Yes, former		No	Yes	No	No	No	No	No	No	No	No	No	No	No	no	no	no	65	101/56	97	24	14	36	8.8	0.46	6.8	235	0	0.01	5.07	1.09	0.58	4.2	72	90	137	3.9	27	31
VUMC016 day 0	VUMC016	day 0	baseline	Placebo	66	Male	172	95.8	32.38	Yes, former		No	Yes	No	No	Yes	No	No	No	No	Yes	No	No	No	no	no	no	94	144/77	93	30	20	39.5	9	0.45	7.3	186	0	0.02	5.88	0.91	0.45	5.5	88	78	135	4	67	49
VUMC016 day 3	VUMC016	day 3	follow up	Placebo	66	Male	172	95.8	32.38	Yes, former		No	Yes	No	No	Yes	No	No	No	No	Yes	No	No	No	no	no	no	94	144/77	93	30	20	39.5	9	0.45	7.3	186	0	0.02	5.88	0.91	0.45	5.5	88	78	135	4	67	49
VUMC017 day 0	VUMC017	day 0	baseline	Imatinib	47	Female	165	103	37.83	No		No	No	No	No	No	No	No	No	No	No	No	No	No	no	no	no	96	106/71	94	30	36	38.4	7.6	0.37	4.7	269	0.02	0.01	3.45	1.03	0.2		46	90	140	3.4	42	13
VUMC017 day 3	VUMC017	day 3	follow up	Imatinib	47	Female	165	103	37.83	No		No	No	No	No	No	No	No	No	No	No	No	No	No	no	no	no	96	106/71	94	30	36	38.4	7.6	0.37	4.7	269	0.02	0.01	3.45	1.03	0.2		46	90	140	3.4	42	13
VUMC018 day 0	VUMC018	day 0	baseline	Placebo	79	Female	175	75	24.49	No		No	Yes	No	No	No	No	No	No	No	No	No	No	Yes	no	no	no	83	148/75	96	33	18	37.3	7.5	0.37	13.9	436	0	0.02	12.01	0.9	0.83	13.8	94	50	133	2.6	39	22
VUMC018 day 2	VUMC018	day 2	follow up	Placebo	79	Female	175	75	24.49	No		No	Yes	No	No	No	No	No	No	No	No	No	No	Yes	no	no	no	83	148/75	96	33	18	37.3	7.5	0.37	13.9	436	0	0.02	12.01	0.9	0.83	13.8	94	50	133	2.6	39	22
VUMC019 day 0	VUMC019	day 0	baseline	Placebo	63	Female	156	60	24.65	Yes, former		No	No	Yes	No	No	No	No	No	No	No	No	No	No	no	no	no	110	120/71	94	26	20	37.1	9.1	0.47	4.9	190	0.01	0.01	3.66	0.82	0.42	5.3	52	90	140	4.3	44	42
VUMC019 day 3	VUMC019	day 3	follow up	Placebo	63	Female	156	60	24.65	Yes, former		No	No	Yes	No	No	No	No	No	No	No	No	No	No	no	no	no	110	120/71	94	26	20	37.1	9.1	0.47	4.9	190	0.01	0.01	3.66	0.82	0.42	5.3	52	90	140	4.3	44	42
VUMC020 day 0	VUMC020	day 0	baseline	Imatinib	93	Male				Yes, former		Yes	No	No	No	No	No	No	No	No	No	No	No	Yes	no	no	no	94	166/74	94	26	22	36.8	7.8	0.38	4.6	184	0	0.01	3.61	0.46	0.53	10.5	112	48	137	3.6	26	17
VUMC020 day 2	VUMC020	day 2	follow up	Imatinib	93	Male				Yes, former		Yes	No	No	No	No	No	No	No	No	No	No	No	Yes	no	no	no	94	166/74	94	26	22	36.8	7.8	0.38	4.6	184	0	0.01	3.61	0.46	0.53	10.5	112	48	137	3.6	26	17
VUMC021 day 0	VUMC021	day 0	baseline	Placebo	73	Female	164	92	34.21	Yes, former	0.5	Yes	Yes	Yes	No	No	No	No	No	No	No	No	No	Yes	no	no	no	96	135/85	93	24	20	37.1	7.8	0.38	7.3	374	0	0.03	5.33	1.49	0.4	4.9	71	73	135	3.6	48	24
VUMC021 day 3	VUMC021	day 3	follow up	Placebo	73	Female	164	92	34.21	Yes, former	0.5	Yes	Yes	Yes	No	No	No	No	No	No	No	No	No	Yes	no	no	no	96	135/85	93	24	20	37.1	7.8	0.38	7.3	374	0	0.03	5.33	1.49	0.4	4.9	71	73	135	3.6	48	24
VUMC022 day 0	VUMC022	day 0	baseline	Imatinib	65	Male	172	98	33.13	No		No	No	No	No	No	No	No	No	No	No	No	No	No	no	yes	yes	84	126//84	95	32	24	36.1	7.3		12.7	178	0	0.01	11.84	0.31	0.43		75	90	140	3.6
VUMC022 day 3	VUMC022	day 3	follow up	Imatinib	65	Male	172	98	33.13	No		No	No	No	No	No	No	No	No	No	No	No	No	No	no	yes	yes	84	126//84	95	32	24	36.1	7.3		12.7	178	0	0.01	11.84	0.31	0.43		75	90	140	3.6
VUMC023 day 0	VUMC023	day 0	baseline	Imatinib	28	Male	183	100	29.86	Not asked		No	No	No	No	No	No	No	No	No	No	No	No	No	no	no	yes	64	131/69	94	35		36.4	9.9	0.49	5.3	135						5.7	76	90	139	4.3	70	132
VUMC024 day 0	VUMC024	day 0	baseline	Imatinib	70	Male	172	86	29.07	Not asked		Yes	Yes	No	No	Yes	No	No	No	No	No	No	No	Yes	no	yes	yes	90		98	30		36.8	7.8		9	537	0.01	0.01	6.98	1.56	0.36	3.7	76	88	137	4	44	71
VUMC024 day 3	VUMC024	day 3	follow up	Imatinib	70	Male	172	86	29.07	Not asked		Yes	Yes	No	No	Yes	No	No	No	No	No	No	No	Yes	no	yes	yes	90		98	30		36.8	7.8		9	537	0.01	0.01	6.98	1.56	0.36	3.7	76	88	137	4	44	71
VUMC025 day 0	VUMC025	day 0	baseline	Placebo	74	Male	178	95	29.98	Yes, former	43	No	Yes	Yes	No	No	No	Yes	No	No	No	No	No	No	no	no	yes	81	108/70	93	30	20	37.1	8.2		9.2	236	0	0.01	8.51	0.34	0.25	8	53	90	138	3.9	36	32
VUMC026 day 0	VUMC026	day 0	baseline	Placebo	59	Male	170	68	23.53	Not asked		No	No	No	No	No	No	No	No	No	No	No	No	No	no	no	yes	77	142/75	96	40	21	36.5	9.1	0.45	14.7	410						7.7	66	90	136	4.6	58	72
VUMC026 day 3	VUMC026	day 3	follow up	Placebo	59	Male	170	68	23.53	Not asked		No	No	No	No	No	No	No	No	No	No	No	No	No	no	no	yes	77	142/75	96	40	21	36.5	9.1	0.45	14.7	410						7.7	66	90	136	4.6	58	72
VUMC027 day 0	VUMC027	day 0	baseline	Imatinib	83	Male	180	84.8	26.17	No		No	Yes	No	No	Yes	No	No	No	No	No	No	No	Yes	no	yes	yes	51	124/70	97	26	18	36	8.8	0.45	6.1	133	0.01	0.02	4.78	1	0.31	3.9	69	83	136	3.6	21	27
VUMC027 day 3	VUMC027	day 3	follow up	Imatinib	83	Male	180	84.8	26.17	No		No	Yes	No	No	Yes	No	No	No	No	No	No	No	Yes	no	yes	yes	51	124/70	97	26	18	36	8.8	0.45	6.1	133	0.01	0.02	4.78	1	0.31	3.9	69	83	136	3.6	21	27
VUMC028 day 0	VUMC028	day 0	baseline	Placebo	52	Male				Not done		Yes	No	No	No	No	No	No	No	No	No	No	No	No	no	yes	yes	66	92/63	89	28	25	36	8.6	0.43	9.1	357	0	0.01	7.11	0.78	0.9	10.6			139	3.9	29	34
VUMC028 day 2	VUMC028	day 2	follow up	Placebo	52	Male				Not done		Yes	No	No	No	No	No	No	No	No	No	No	No	No	no	yes	yes	66	92/63	89	28	25	36	8.6	0.43	9.1	357	0	0.01	7.11	0.78	0.9	10.6			139	3.9	29	34
VUMC029 day 0	VUMC029	day 0	baseline	Imatinib	69	Male	166	74.5	27.04	No		No	No	No	No	No	No	No	No	No	No	No	No	No	no	yes	yes	82	136/83	91	32	20	36.6	8.3	0.39	6.3	233	0	0.01	5.1	0.64	0.49	4.1	70	90	130	4.2	72	84
VUMC029 day 3	VUMC029	day 3	follow up	Imatinib	69	Male	166	74.5	27.04	No		No	No	No	No	No	No	No	No	No	No	No	No	No	no	yes	yes	82	136/83	91	32	20	36.6	8.3	0.39	6.3	233	0	0.01	5.1	0.64	0.49	4.1	70	90	130	4.2	72	84
VUMC030 day 3	VUMC030	day 3	follow up	Placebo	73	Female	160	84	32.81	Yes, former	10	Yes	Yes	No	No	Yes	No	No	No	No	No	Yes	No	No	no	yes	yes	82	113/69	93	28	16	37.8	8.6		4.1	300	0	0.01	3.26	0.59	0.18	8.2	128	36	135	3.8
VUMC031 day 0	VUMC031	day 0	baseline	Imatinib	59	Male	180	85	26.23	No		No	No	No	No	No	No	No	No	No	No	No	No	No	no	yes	yes	96	111/73	96	32	22	38.6	8.5	0.41	9.4	314	0	0.01	7.43	1.41	0.53	5.8	91	79	141	4.2	39	26
VUMC031 day 3	VUMC031	day 3	follow up	Imatinib	59	Male	180	85	26.23	No		No	No	No	No	No	No	No	No	No	No	No	No	No	no	yes	yes	96	111/73	96	32	22	38.6	8.5	0.41	9.4	314	0	0.01	7.43	1.41	0.53	5.8	91	79	141	4.2	39	26
VUMC032 day 0	VUMC032	day 0	baseline	Placebo	59	Female	168	93	32.95	Yes, former	15	No	No	No	No	No	No	No	No	No	No	No	No	No	no	yes	yes	73	111/71	93	22		38	8		4.6	172	0	0.01	4.01	0.46	0.14	4.1	57	90	135	4.3	73	66
VUMC032 day 3	VUMC032	day 3	follow up	Placebo	59	Female	168	93	32.95	Yes, former	15	No	No	No	No	No	No	No	No	No	No	No	No	No	no	yes	yes	73	111/71	93	22		38	8		4.6	172	0	0.01	4.01	0.46	0.14	4.1	57	90	135	4.3	73	66
VUMC033 day 0	VUMC033	day 0	baseline	Imatinib	78	Male	185	74	21.62	No		No	No	No	No	No	No	No	Yes	No	No	No	No	No	no	yes	yes	89	125/68	91	24		36.3	8.5		7	138	0.01	0.02	5.06	1.49	0.41	3.5	84	76	141	4	46	45
VUMC033 day 3	VUMC033	day 3	follow up	Imatinib	78	Male	185	74	21.62	No		No	No	No	No	No	No	No	Yes	No	No	No	No	No	no	yes	yes	89	125/68	91	24		36.3	8.5		7	138	0.01	0.02	5.06	1.49	0.41	3.5	84	76	141	4	46	45
VUMC034 day 0	VUMC034	day 0	baseline	Placebo	69	Male	165	69.7	25.6	Yes, former	10	Yes	No	No	No	No	No	No	No	No	No	No	No	Yes	no	yes	no	65	101/60	91	20	18	37.2	9.2	0.44	6.2	214	0.01	0.01	4.84	0.71	0.58	12.4	117	54	132	2.8	55	45
VUMC034 day 3	VUMC034	day 3	follow up	Placebo	69	Male	165	69.7	25.6	Yes, former	10	Yes	No	No	No	No	No	No	No	No	No	No	No	Yes	no	yes	no	65	101/60	91	20	18	37.2	9.2	0.44	6.2	214	0.01	0.01	4.84	0.71	0.58	12.4	117	54	132	2.8	55	45
VUMC035 day 0	VUMC035	day 0	baseline	Imatinib	60	Female	162	85	32.39	No		No	No	No	No	No	No	No	No	No	No	No	No	No	no	yes	no	66	124/73	94	24	20	37	7.4		5.1	261	0	0	3.91	1.05	0.11	4.2	50	90	137	3.8	56	46
VUMC035 day 3	VUMC035	day 3	follow up	Imatinib	60	Female	162	85	32.39	No		No	No	No	No	No	No	No	No	No	No	No	No	No	no	yes	no	66	124/73	94	24	20	37	7.4		5.1	261	0	0	3.91	1.05	0.11	4.2	50	90	137	3.8	56	46
VUMC036 day 0	VUMC036	day 0	baseline	Placebo	64	Male	175	120	39.18	No		Yes	No	No	No	No	No	No	No	No	No	No	No	No	no	yes	yes	92	146/82	93	30			8.4	0.42	10.6	287	0	0.02	9.44	0.71	0.28	7.5	107	63	136	3.8	121	64
VUMC036 day 3	VUMC036	day 3	follow up	Placebo	64	Male	175	120	39.18	No		Yes	No	No	No	No	No	No	No	No	No	No	No	No	no	yes	yes	92	146/82	93	30			8.4	0.42	10.6	287	0	0.02	9.44	0.71	0.28	7.5	107	63	136	3.8	121	64
VUMC037 day 0	VUMC037	day 0	baseline	Imatinib	77	Male	170	79.5	27.51	Yes, former		No	No	Yes	No	No	No	No	No	No	No	No	No	No	no	no	yes	71	129/68	96	25	18	36.5	7.8		8.3	182						6.7	61	90	140	3.8	39	29
VUMC037 day 3	VUMC037	day 3	follow up	Imatinib	77	Male	170	79.5	27.51	Yes, former		No	No	Yes	No	No	No	No	No	No	No	No	No	No	no	no	yes	71	129/68	96	25	18	36.5	7.8		8.3	182						6.7	61	90	140	3.8	39	29
VUMC038 day 0	VUMC038	day 0	baseline	Placebo	84	Male	176	76	24.54	No		No	Yes	No	No	Yes	No	No	No	No	No	No	No	Yes	no	yes	yes	61	148/76	92	24	20	36.4	8.6	0.41	15.2	118							118	48	134	3.9
VUMC038 day 2	VUMC038	day 2	follow up	Placebo	84	Male	176	76	24.54	No		No	Yes	No	No	Yes	No	No	No	No	No	No	No	Yes	no	yes	yes	61	148/76	92	24	20	36.4	8.6	0.41	15.2	118							118	48	134	3.9
VUMC040 day 0	VUMC040	day 0	baseline	Placebo	44	Male				No		Yes	No	No	No	No	No	No	No	No	No	No	No	No	no	yes	yes	81	111/75	95	30	20	36.4	9.2		5.8	311	0.01	0.01	3.91	1.4	0.4	4.7	81	90	133	4.2		49
VUMC040 day 2	VUMC040	day 2	follow up	Placebo	44	Male				No		Yes	No	No	No	No	No	No	No	No	No	No	No	No	no	yes	yes	81	111/75	95	30	20	36.4	9.2		5.8	311	0.01	0.01	3.91	1.4	0.4	4.7	81	90	133	4.2		49
VUMC041 day 3	VUMC041	day 3	follow up	Placebo	82	Male	171	95	32.49	Yes, former		No	Yes	Yes	Yes	No	No	Yes	No	No	No	No	No	Yes	no	yes	yes	93	156/96	87	85	35	36.7	10.6		10	200	0	0.02	8.51	0.59	0.71	9.8	108	55	140	3.7	77	32
VUMC042 day 0	VUMC042	day 0	baseline	Imatinib	60	Male	174			Yes, former		Yes	No	No	No	No	No	No	No	No	No	No	No	No	no	yes	yes	68	123/81	93	70	20	36	7.9		6.1	254	0.06	0.01	4.69	0.96	0.36	6.1	53	90	138	4.5		22
VUMC042 day 3	VUMC042	day 3	follow up	Imatinib	60	Male	174			Yes, former		Yes	No	No	No	No	No	No	No	No	No	No	No	No	no	yes	yes	68	123/81	93	70	20	36	7.9		6.1	254	0.06	0.01	4.69	0.96	0.36	6.1	53	90	138	4.5		22
VUMC043 day 0	VUMC043	day 0	baseline	Imatinib	55	Female	170	108	37.37	Yes, former		No	No	Yes	No	No	No	No	No	No	No	No	No	No	no	yes	yes	65	116/77	97	35	18	36.1	9	0.43	6.9	282	0	0.01	4.66	1.81	0.36	3.5	60	90	139	3.6	40	40
VUMC045 day 0	VUMC045	day 0	baseline	Placebo	71	Female	168	95	33.66	No		No	No	No	No	No	No	No	No	Yes	No	No	No	Yes	no	yes	yes	55	157/91	97	24	24	35.7	8.7		8.1	201	0	0.01	6.5	0.94	0.6	7.9	180	40	137	2.7	39	30
VUMC046 day 0	VUMC046	day 0	baseline	Imatinib	58	Male	172	84	28.39	No		No	No	No	No	No	No	No	No	No	No	No	No	No	no	yes	yes	59	123/78	95	30	24	36.5	7.6	0.35	10.3	377	0	0.02	8.58	0.61	0.58	7.9	79	95	136	4.4	52	58
VUMC047 day 0	VUMC047	day 0	baseline	Imatinib	68	Female	168	54	19.13	Yes, former	10	No	No	Yes	No	No	No	No	No	No	No	No	No	No	no	yes	yes	83	150/86	93	25	13	36.6	8		10.7	398	0.24	0.03	7.46	2.08	0.83	6.3	73	73	140	3.8	12	12
VUMC048 day 0	VUMC048	day 0	baseline	Placebo	71	Male	194	68	18.07	Yes, former	25	No	No	Yes	No	No	No	No	No	No	No	No	No	No	no	yes	yes	80	142/76	88	28	16	36.4	9.8		6.1	193	0	0.03		1.18	0.36	10.3	95	70	137	4.2	33	26
VUMC048 day 3	VUMC048	day 3	follow up	Placebo	71	Male	194	68	18.07	Yes, former	25	No	No	Yes	No	No	No	No	No	No	No	No	No	No	no	yes	yes	80	142/76	88	28	16	36.4	9.8		6.1	193	0	0.03		1.18	0.36	10.3	95	70	137	4.2	33	26
VUMC049 day 0	VUMC049	day 0	baseline	Imatinib	62	Female	169	73	25.56	Yes, active	40	No	No	No	No	No	No	No	No	No	No	No	No	Yes	no	yes	yes	71	103/64	93	28	20	36.7	8.4		9.3	330	0.01	0.01	7.78	0.83	0.61	4.2	63	90	138	3.9
VUMC049 day 3	VUMC049	day 3	follow up	Imatinib	62	Female	169	73	25.56	Yes, active	40	No	No	No	No	No	No	No	No	No	No	No	No	Yes	no	yes	yes	71	103/64	93	28	20	36.7	8.4		9.3	330	0.01	0.01	7.78	0.83	0.61	4.2	63	90	138	3.9
VUMC050 day 0	VUMC050	day 0	baseline	Placebo	76	Female	150	66.8	29.69	No		No	Yes	No	No	Yes	No	Yes	No	No	No	No	No	No	no	yes	yes	76	148/79	93	26	24	36.6	8.9		10.6	269	0	0.02	8.3	1.71	0.57	4.1	84	58	135	2.8	38	25
VUMC050 day 3	VUMC050	day 3	follow up	Placebo	76	Female	150	66.8	29.69	No		No	Yes	No	No	Yes	No	Yes	No	No	No	No	No	No	no	yes	yes	76	148/79	93	26	24	36.6	8.9		10.6	269	0	0.02	8.3	1.71	0.57	4.1	84	58	135	2.8	38	25
VUMC051 day 0	VUMC051	day 0	baseline	Placebo	67	Male	185	103	30.09	Yes, former		Yes	No	Yes	No	No	No	No	No	No	No	No	No	Yes	no	yes	yes	72	149/89	92	24	20	36.2	10.4	0.48	6.4	243						5.3	82	81	138	3.7	81	84
VUMC053 day 0	VUMC053	day 0	baseline	Imatinib	69	Male	169	88	30.81	No		Yes	Yes	No	No	Yes	No	No	No	No	No	No	No	Yes	no	no	yes	60	114/74	93	32	24	36.4	8.2	0.41	5	221						4.7	79	85	135	3.5	75	85
VUMC053 day 3	VUMC053	day 3	follow up	Imatinib	69	Male	169	88	30.81	No		Yes	Yes	No	No	Yes	No	No	No	No	No	No	No	Yes	no	no	yes	60	114/74	93	32	24	36.4	8.2	0.41	5	221						4.7	79	85	135	3.5	75	85
VUMC054 day 0	VUMC054	day 0	baseline	Placebo	59	Male	194	113	30.02	Yes, former		No	Yes	No	No	Yes	No	No	No	No	No	No	No	Yes	no	no	yes	84	114/75	92	30	16	36.3	9.5	0.45	14.5	233	0	0.01	13.17	0.69	0.56	8.1	77	95	136	4.1	30	34
VUMC054 day 3	VUMC054	day 3	follow up	Placebo	59	Male	194	113	30.02	Yes, former		No	Yes	No	No	Yes	No	No	No	No	No	No	No	Yes	no	no	yes	84	114/75	92	30	16	36.3	9.5	0.45	14.5	233	0	0.01	13.17	0.69	0.56	8.1	77	95	136	4.1	30	34
VUMC055 day 0	VUMC055	day 0	baseline	Placebo	46	Male	186	125	36.13	Yes, former	10	No	No	No	No	No	Yes	No	No	No	No	No	Yes	No	no	no	yes	73	127/84	96	26		36.2	8.9	0.43	6.5	189	0	0.01	5.14	1	0.3	5.1	99	78	133	3.4	50	40
VUMC055 day 3	VUMC055	day 3	follow up	Placebo	46	Male	186	125	36.13	Yes, former	10	No	No	No	No	No	Yes	No	No	No	No	No	Yes	No	no	no	yes	73	127/84	96	26		36.2	8.9	0.43	6.5	189	0	0.01	5.14	1	0.3	5.1	99	78	133	3.4	50	40
VUMC057 day 0	VUMC057	day 0	baseline	Placebo	36	Male	176	85	27.44	No		No	No	No	No	No	No	No	No	No	No	No	No	No	no	yes	yes	74	115/75	94	28	20	36.2	8.2	0.4	6.3	300	0	0.01	5.04	0.84	0.29	7.3	94	89	138	5	44	31
VUMC057 day 3	VUMC057	day 3	follow up	Placebo	36	Male	176	85	27.44	No		No	No	No	No	No	No	No	No	No	No	No	No	No	no	yes	yes	74	115/75	94	28	20	36.2	8.2	0.4	6.3	300	0	0.01	5.04	0.84	0.29	7.3	94	89	138	5	44	31
VUMC058 day 0	VUMC058	day 0	baseline	Imatinib	76	Male	167	61	21.87	No		No	No	No	No	No	No	No	No	No	No	No	No	Yes	no	no	yes	86	146/88	92	30	28	38.5	8.7	0.41	4.4	322	0.02	0	3.71	0.45	0.16	12.6	79	83	134	4.1		13
VUMC058 day 3	VUMC058	day 3	follow up	Imatinib	76	Male	167	61	21.87	No		No	No	No	No	No	No	No	No	No	No	No	No	Yes	no	no	yes	86	146/88	92	30	28	38.5	8.7	0.41	4.4	322	0.02	0	3.71	0.45	0.16	12.6	79	83	134	4.1		13
VUMC059 day 0	VUMC059	day 0	baseline	Placebo	57	Female	155	81.7	34.01	No		No	No	No	No	No	No	No	No	No	No	No	No	Yes	no	no	yes	90	112/61	93	26	18	36.4	7.9	0.38	4.5	224	0.02	0.01	3.47	0.68	0.34	3.6	56	95	134	3.6		106
VUMC059 day 3	VUMC059	day 3	follow up	Placebo	57	Female	155	81.7	34.01	No		No	No	No	No	No	No	No	No	No	No	No	No	Yes	no	no	yes	90	112/61	93	26	18	36.4	7.9	0.38	4.5	224	0.02	0.01	3.47	0.68	0.34	3.6	56	95	134	3.6		106
VUMC060 day 0	VUMC060	day 0	baseline	Imatinib	53	Male	165	71	26.08	No		No	Yes	No	No	Yes	No	No	No	No	No	No	Yes	Yes	no	no	yes	74	125/71	94	24	18	36.1	7.9	0.34	3.3	160	0	0	2.19	0.6	0.2	5.9	95	71	139	3.7	33	17
VUMC061 day 0	VUMC061	day 0	baseline	Placebo	69	Male	170	90	31.14	No		No	No	No	No	No	No	No	No	Yes	No	No	No	No	no	no	yes	72	128/73	93	32	24	36.5	9.3	0.46	12	308	0	0.02	6.49	0.64	0.46	8.7	99	66	137	4.1	80	46
VUMC061 day 3	VUMC061	day 3	follow up	Placebo	69	Male	170	90	31.14	No		No	No	No	No	No	No	No	No	Yes	No	No	No	No	no	no	yes	72	128/73	93	32	24	36.5	9.3	0.46	12	308	0	0.02	6.49	0.64	0.46	8.7	99	66	137	4.1	80	46
VUMC062 day 0	VUMC062	day 0	baseline	Placebo	63	Male	180	96	29.63	No		No	No	No	No	No	No	No	No	No	No	No	No	Yes	no	no	yes	88	124/86	94	24	18	37.5	10.3	0.48	4.7	198	0	0.01	3.32	0.79	0.53	6.5	116	57	139	3.8	50	41
VUMC064 day 0	VUMC064	day 0	baseline	Imatinib	56	Male	186	85	24.57	No		No	No	No	No	No	No	No	No	No	No	No	No	No	no	no	yes	57	122/74	100	24	18	36.6	9.9	0.46	5.5	253	0	0	4.31	0.86	0.33	4.5	100	72	129	3.5	39	20
VUMC065 day 0	VUMC065	day 0	baseline	Placebo	64	Male	175	81.3	26.55	Yes, active		Yes	Yes	No	No	Yes	No	No	No	No	No	No	No	Yes	no	no	yes	97	114/70	93	30	20	35.8	10.4	0.51	10.7	300	0	0.03	8.97	1.32	0.27	9.7	109	61	139	4.9	58	35
VUMC065 day 3	VUMC065	day 3	follow up	Placebo	64	Male	175	81.3	26.55	Yes, active		Yes	Yes	No	No	Yes	No	No	No	No	No	No	No	Yes	no	no	yes	97	114/70	93	30	20	35.8	10.4	0.51	10.7	300	0	0.03	8.97	1.32	0.27	9.7	109	61	139	4.9	58	35
VUMC066 day 0	VUMC066	day 0	baseline	Imatinib	57	Male	184	90	26.58	No		No	No	No	No	No	No	No	No	No	No	No	No	Yes	no	no	yes	65	120/73	96	28	18	35.6	9.4	0.44	8.2	192	0.01	0.02	7.03	0.75	0.36	6.9	94	77	135	3.6	49	42
VUMC066 day 3	VUMC066	day 3	follow up	Imatinib	57	Male	184	90	26.58	No		No	No	No	No	No	No	No	No	No	No	No	No	Yes	no	no	yes	65	120/73	96	28	18	35.6	9.4	0.44	8.2	192	0.01	0.02	7.03	0.75	0.36	6.9	94	77	135	3.6	49	42
VUMC067 day 0	VUMC067	day 0	baseline	Imatinib	71	Male	185	90	26.3	No		Yes	No	No	No	No	No	No	No	No	No	No	No	No	no	no	yes	76	138/78	95	24	16	36	8.2	0.36	7.9	284	0.04	0.02	5.78	1.4	0.63	5.1	84	80	135	4	30	21
VUMC068 day 0	VUMC068	day 0	baseline	Placebo	66	Male	183	80	23.89	No		No	No	Yes	No	No	No	No	No	No	No	No	No	No	no	no	yes	61	147/83	97	30	20	37.8	8.5	0.4	9.2	400	0.04	0.01	7.63	0.59	0.82	4.6	71	95	136	4.4	33	61
VUMC069 day 0	VUMC069	day 0	baseline	Placebo	48	Female		93		No		No	No	No	No	No	No	No	No	No	No	No	No	Yes	no	no	yes	70	162/100	99	26	16	36.9	7.6	0.37	6.4	359	0.21	0.02	4.46	1.37	0.33	4.3	52	95	139	3.9	47	49
VUMC069 day 3	VUMC069	day 3	follow up	Placebo	48	Female		93		No		No	No	No	No	No	No	No	No	No	No	No	No	Yes	no	no	yes	70	162/100	99	26	16	36.9	7.6	0.37	6.4	359	0.21	0.02	4.46	1.37	0.33	4.3	52	95	139	3.9	47	49
VUMC070 day 0	VUMC070	day 0	baseline	Imatinib	65	Male				No		Yes	Yes	No	No	Yes	No	No	No	No	No	No	No	Yes	no	no	yes	62	125/73	92	26	24	35.9	7.6	0.36	6	233	0.01	0.01	3.85	1.41	0.69	4.5	54	90	137	4	53	38
VUMC070 day 2	VUMC070	day 2	follow up	Imatinib	65	Male				No		Yes	Yes	No	No	Yes	No	No	No	No	No	No	No	Yes	no	no	yes	62	125/73	92	26	24	35.9	7.6	0.36	6	233	0.01	0.01	3.85	1.41	0.69	4.5	54	90	137	4	53	38
VUMC071 day 0	VUMC071	day 0	baseline	Placebo	36	Male	155	74	30.8	No		No	No	No	No	No	No	No	No	No	No	No	No	No	no	no	yes	88	106/75	94	85	32	36.1	10.5	0.44	11.1	258	0	0.02	9.41	1.03	0.56	4.6	78	95	142	4.5	55	42
VUMC071 day 3	VUMC071	day 3	follow up	Placebo	36	Male	155	74	30.8	No		No	No	No	No	No	No	No	No	No	No	No	No	No	no	no	yes	88	106/75	94	85	32	36.1	10.5	0.44	11.1	258	0	0.02	9.41	1.03	0.56	4.6	78	95	142	4.5	55	42
VUMC072 day 0	VUMC072	day 0	baseline	Imatinib	79	Female	153	40	17.09	Yes, former	30	No	No	Yes	No	No	No	No	No	No	No	No	No	No	no	no	yes	82	155/79	98	28	24	36	8.9	0.43	6.9	313	0	0.02	5.34	0.83	0.7	2.6	39	95	133	3.1	53	42
VUMC072 day 3	VUMC072	day 3	follow up	Imatinib	79	Female	153	40	17.09	Yes, former	30	No	No	Yes	No	No	No	No	No	No	No	No	No	No	no	no	yes	82	155/79	98	28	24	36	8.9	0.43	6.9	313	0	0.02	5.34	0.83	0.7	2.6	39	95	133	3.1	53	42
VUMC073 day 0	VUMC073	day 0	baseline	Imatinib	37	Male	173	114	38.09	Yes, former		No	No	Yes	No	No	No	No	No	No	No	No	No	No	no	no	yes	82	129/63	95	60	28		8.6	0.43	6.4	337	0	0.03	8.21	1.07	0.16	4.9	62	95	142	4.1	123	60
VUMC073 day 3	VUMC073	day 3	follow up	Imatinib	37	Male	173	114	38.09	Yes, former		No	No	Yes	No	No	No	No	No	No	No	No	No	No	no	no	yes	82	129/63	95	60	28		8.6	0.43	6.4	337	0	0.03	8.21	1.07	0.16	4.9	62	95	142	4.1	123	60
VUMC074 day 3	VUMC074	day 3	follow up	Imatinib	67	Female	170	79	27.34	Yes, former	26	No	No	No	No	No	No	No	No	No	No	No	Yes	Yes	no	no	yes	51	123/67	96	30	16	36.4	9.7	0.47	5.8	232	0.1	0.1	3.1	2.2	0.5	2.7	56	90	137	3.4	32	38
VUMC075 day 0	VUMC075	day 0	baseline	Placebo	56	Female	158	106	42.46	No		No	No	No	No	Yes	No	No	No	No	No	No	No	Yes	no	no	yes	92	130/74	93	30	20	37.5	8.1	0.41	7.8	204	0.01	0.03	6.28	0.66	0.67	5.8	82	69	139	4.9	90	103
VUMC075 day 3	VUMC075	day 3	follow up	Placebo	56	Female	158	106	42.46	No		No	No	No	No	Yes	No	No	No	No	No	No	No	Yes	no	no	yes	92	130/74	93	30	20	37.5	8.1	0.41	7.8	204	0.01	0.03	6.28	0.66	0.67	5.8	82	69	139	4.9	90	103
[truncated: 5,000 more columns]

## Sheet: SDF1 DD
Variable name	Field label	Field type
plasmaID	Pseudonomized record id + time	string
record_id	Pseudonomized record id	string
day	day of blood collection	categorical
time	baseline or follow-up measurement	categorical
randomized_group_blind	Treatment allocation (Imatinib/Placebo)	categorical
Age	Age	numeric
Sex	Sex	categorical
height	Height (cm)	numeric
weight	Weight (kg)	numeric
bmi	Body Mass Index	calculation
smoke	Is the patient a (current/former) smoker?	categorical
smoke_PY	Smoking pack years	numeric
co_morb_Diabetes	Does the patient have comorbid Diabetes Mellitus?	categorical
co_morb_Cardiovascular_disease	Does the patient have any comorbid cardiovascular disease?	categorical
co_morb_COPDAstma	Does the patient have any comorbid COPD or astma?	categorical
co_morb_Heart_arrhythmia_Afib_Af	Does the patient have comorbid atrium fibrillation or flutter?	categorical
co_morb_Coronary_Artery_Disease	Does the patient have comorbid coronary artery disease?	categorical
co_morb_Heart_Conduction_Disorde	Does the patient have a comorbid conduction conduction disorder?	categorical
co_morb_heart_valve_disease	Does the patient have comorbid heart valve disese?	categorical
co_morb_Thrombosis__PE	Does the patient have a history of deep vein thrombosis of pulmonary embolisms?	categorical
co_morb_Renal_failure	Does the patient have comorbid chronic renal failure?	categorical
co_morb_Hepatic_disease	Does the patient have comorbid hepatic disease?	categorical
co_morb_Rheumatic_disease	Does the patient have comorbid rheumatic disease?	categorical
co_morb_Heart_Failure	Does the patient have (a history of) heart failure?	categorical
co_morb_Hypertension	Does the patient have comorbid hypertension?	categorical
chloroquine_incl	Use of chloroquine or hydroxychloroquine	categorical
remdesivir	Use of dexamethasone	categorical
dexamethason	Use of remdesivir	categorical
HR_incl	Baseline Heart rate	numeric
BP_incl	Baseline blood pressure (systole/diastole)	string
SaO2_incl	Baseline peripheral SaO2	numeric
FiO2_0	Baseline fraction of inspired oxygen	numeric
resp_rate_incl	Baseline respiratory rate	numeric
temp	Baseline temperature (Celsius)	numeric
hb_incl	Baseline Haemoglobin concentration	numeric
ht_incl	Baseline Hematocrit value	numeric
leuko_incl	Baseline Leukocyte count	numeric
trombo_incl	Baseline Thrombocyte count	numeric
eos_incl	Baseline eosinophils	numeric
baso_incl	Baseline basophils	numeric
neutro_incl	Baseline neutrophils	numeric
lymfo_incl	Baseline lymphocytes	numeric
monocytes_incl	Baseline monocytes	numeric
urea_incl	Baseline Urea	numeric
creat_incl	Baseline Creatinine	numeric
eGFR_incl	Baseline eGFR	numeric
Sodium_incl	Baseline Sodium	numeric
Potassium_incl	Baseline Potassium	numeric
asat_incl	Baseline ASAT	numeric
alat_incl	Baseline ALAT	numeric
bili_incl	Baseline Bilirubin	numeric
ggt_incl	Baseline gGT	numeric
AF_incl	Baseline AF	numeric
LDH_incl	Baseline LDH	numeric
Albumin_incl	Baseline Albumin	numeric
CRP_incl	Baseline CRP	numeric
NTproBNP_incl	Baseline NTproBNP	numeric
QTc	Baseline QTc time	numeric
need_icu_adm	Was the patient admitted to the MC/ICU?	categorical
ICU_duration	How many days was the patient admitted to the ICU since start study?	numeric
need_NIV	Did the patient receive non invasive ventilation? (NIV)	categorical
days_niv	Total number of days with non-invasive ventilation	numeric
need_invasive_vent	Did the patient receive invasive ventilation?	categorical
mv_duration	Total number of days with invasive ventilation	numeric
free_from_oxy_48h	Did the patient reach liberation of mechanical ventilation and supplemental oxygen for >48h?	categorical
primary_endpoint	Calculation of primary endpoint (time to liberation of oxygen)	calculation
ECMO_day90	Need for extracorporeal membrane oxygenation (ECMO)	categorical
ECMO_days_day90	Duration of ECMO	numeric
outcome_status_day0	Status on day 0	categorical
organ_support_day0	What kind of organ support?	categorical
outcome_status_day9	Status on day 9	categorical
organ_support_day9	What kind of organ support?	categorical
outcome_status_day28	Status on day 28	categorical
organ_support_day28	What kind of organ support?	categorical
outcome_status_day90	Status on day 90	categorical
organ_support_day90	What kind of organ support?	categorical
death	Did the patient die during 90 day follow up?	categorical
days_alive_day90	How many days was the patient alive?	numeric
admission_duration	How many days was the patient admitted to the hospital since start study?	numeric
RowCheck	Scale Factor Acceptance Criteria per plate is between 0.4-2.5	categorical
NormScale_20	Median Normalization Scale, dilutation 20%	numeric
NormScale_0_005	Median Normalization Scale, dilutation 0.005%	numeric
NormScale_0_5	Median Normalization Scale, dilutation 0.5%	numeric
seq.10000.28	Beta-crystallin B2	numeric
seq.10001.7	RAF proto-oncogene serine/threonine-protein kinase	numeric
seq.10003.15	Zinc finger protein 41	numeric
seq.10006.25	ETS domain-containing protein Elk-1	numeric
seq.10008.43	Guanylyl cyclase-activating protein 1	numeric
seq.10010.10	Beclin-1	numeric
seq.10011.65	Inositol polyphosphate 5-phosphatase OCRL-1	numeric
seq.10012.5	SAM pointed domain-containing Ets transcription factor	numeric
seq.10014.31	Zinc finger protein SNAI2	numeric
seq.10015.119	Voltage-gated potassium channel subunit beta-2	numeric
seq.10022.207	DNA polymerase eta	numeric
seq.10023.32	Vitamin D3 receptor	numeric
seq.10024.44	4-hydroxy-2-oxoglutarate aldolase, mitochondrial	numeric
seq.10025.1	Dihydrolipoyl dehydrogenase, mitochondrial	numeric
seq.10030.8	Adenine DNA glycosylase	numeric
seq.10035.6	Dual specificity protein phosphatase 4	numeric
seq.10036.201	Zinc fingers and homeoboxes protein 3	numeric
seq.10037.98	Sialic acid-binding Ig-like lectin 12:Ig-like V-type 2 domain, Isoform long	numeric
seq.10039.32	Purine nucleoside phosphorylase	numeric
seq.10040.63	Tumor protein 63	numeric
seq.10041.3	Hepatocyte nuclear factor 4-alpha	numeric
seq.10042.8	Serine/threonine-protein kinase Sgk3	numeric
seq.10043.31	Bromodomain-containing protein 4	numeric
seq.10044.12	Protein Wnt-10a	numeric
seq.10045.47	Cullin-3	numeric
seq.10046.55	Baculoviral IAP repeat-containing protein 2	numeric
seq.10047.12	Neutrophil cytosol factor 2	numeric
seq.10048.7	Core-binding factor subunit beta	numeric
seq.10049.112	Telomeric repeat-binding factor 1	numeric
seq.10053.5	Integrin-linked protein kinase	numeric
seq.10054.3	Gigaxonin	numeric
seq.10056.5	Forkhead box protein M1	numeric
seq.10058.1	UV excision repair protein RAD23 homolog A	numeric
seq.10063.10	E3 ubiquitin-protein ligase FANCL	numeric
seq.10064.12	Putative hydrolase RBBP9	numeric
seq.10069.2	Peptidyl-prolyl cis-trans isomerase NIMA-interacting 1	numeric
seq.10070.22	1-phosphatidylinositol 4,5-bisphosphate phosphodiesterase gamma-2	numeric
seq.10073.22	Tyrosyl-DNA phosphodiesterase 1	numeric
seq.10074.128	Bromodomain-containing protein 2	numeric
seq.10075.75	Acyl-CoA-binding domain-containing protein 6	numeric
seq.10076.1	AP-4 complex subunit mu-1	numeric
seq.10078.5	BAG family molecular chaperone regulator 3	numeric
seq.10080.9	Translation initiation factor eIF-2B subunit alpha	numeric
seq.10081.17	DNA-binding protein SATB2	numeric
seq.10082.251	Neurofilament light polypeptide	numeric
seq.10085.25	Steroidogenic acute regulatory protein, mitochondrial	numeric
seq.10086.39	Cystathionine beta-synthase	numeric
seq.10087.10	Alpha-crystallin A chain	numeric
seq.10088.37	Adenine phosphoribosyltransferase	numeric
seq.10089.7	N-acetylserotonin O-methyltransferase-like protein	numeric
seq.10336.3	E3 ubiquitin-protein ligase CHIP	numeric
seq.10339.48	Gamma-enolase	numeric
seq.10342.55	E3 SUMO-protein ligase PIAS4	numeric
seq.10344.334	Interleukin-10 receptor subunit alpha	numeric
seq.10346.5	Signal transducer and activator of transcription 3	numeric
seq.10351.51	Interferon regulatory factor 1	numeric
seq.10354.57	Signal transducer and activator of transcription 3	numeric
seq.10356.21	Transcription factor AP-1	numeric
seq.10361.25	2'-5'-oligoadenylate synthase 1	numeric
seq.10362.35	Myc proto-oncogene protein	numeric
seq.10363.13	Mothers against decapentaplegic homolog 3	numeric
seq.10364.6	Mothers against decapentaplegic homolog 2	numeric
seq.10365.132	Interleukin-23	numeric
seq.10366.11	Platelet-derived growth factor receptor alpha	numeric
seq.10367.62	Interleukin-12	numeric
seq.10370.21	Signal transducer and activator of transcription 1-alpha/beta	numeric
seq.10372.18	Signal transducer and activator of transcription 6	numeric
seq.10382.1	Angiopoietin-related protein 3	numeric
seq.10390.21	E3 ubiquitin-protein ligase ZNRF3	numeric
seq.10391.1	Angiopoietin-related protein 3	numeric
seq.10396.6	Induced myeloid leukemia cell differentiation protein Mcl-1	numeric
seq.10398.110	Ankyrin repeat domain-containing protein 1	numeric
seq.10418.36	Syntaxin-12	numeric
seq.10419.1	Scavenger receptor class A member 5	numeric
seq.10420.30	Fas apoptotic inhibitory molecule 1	numeric
seq.10424.31	Neural proliferation differentiation and control protein 1	numeric
seq.10425.3	Beta-1,4-galactosyltransferase 5	numeric
seq.10426.21	Golgi SNAP receptor complex member 2	numeric
seq.10428.1	Killer cell immunoglobulin-like receptor 2DS2	numeric
seq.10430.31	4F2 cell-surface antigen heavy chain:Cytoplasmic domain	numeric
seq.10432.3	Uncharacterized protein KIAA1644	numeric
seq.10435.2	N(4)-(beta-N-acetylglucosaminyl)-L-asparaginase	numeric
seq.10438.19	Granulocyte-macrophage colony-stimulating factor receptor subunit alpha	numeric
seq.10439.57	Alpha-amylase 2B	numeric
seq.10440.26	CXADR-like membrane protein:Extracellular domain	numeric
seq.10442.1	Transmembrane protein 190	numeric
seq.10445.20	Apolipoprotein M	numeric
seq.10447.18	Polyadenylate-binding protein 3	numeric
seq.10449.31	Protein shisa-2 homolog	numeric
seq.10451.11	Nucleobindin-1	numeric
seq.10453.7	Carcinoembryonic antigen-related cell adhesion molecule 20	numeric
seq.10454.99	DnaJ homolog subfamily C member 16	numeric
seq.10455.196	Interleukin-31	numeric
seq.10457.3	Interleukin-18 receptor accessory protein	numeric
seq.10460.1	Chitotriosidase-1	numeric
seq.10462.14	Insulin-like peptide INSL5	numeric
seq.10463.23	Intestinal-type alkaline phosphatase	numeric
seq.10464.6	Anthrax toxin receptor 1	numeric
seq.10470.34	Thioredoxin domain-containing protein 11:C-term	numeric
seq.10472.53	Tumor necrosis factor receptor superfamily member 14	numeric
seq.10473.2	Trefoil factor 2	numeric
seq.10479.18	Stromelysin-2	numeric
seq.10480.33	CD59 glycoprotein	numeric
seq.10485.56	Melanoma-associated antigen 4	numeric
seq.10490.3	Dolichyl-diphosphooligosaccharide--protein glycosyltransferase subunit 1:Cytoplasmic domain	numeric
seq.10496.11	Calcium-activated chloride channel regulator 1	numeric
seq.10499.1	Transmembrane protein 106A	numeric
seq.10505.12	E3 ubiquitin-protein ligase RNF43	numeric
seq.10506.53	Membrane-associated progesterone receptor component 2	numeric
seq.10507.166	Acrosomal protein SP-10	numeric
seq.10510.62	SLP adapter and CSK-interacting membrane protein	numeric
seq.10511.10	Collagen alpha-3(VI) chain:isoform 3	numeric
seq.10512.13	Cytokine receptor common subunit beta:Extracellular domain	numeric
seq.10513.13	Calsenilin	numeric
seq.10514.5	Prostaglandin-H2 D-isomerase	numeric
seq.10521.10	Matrix-remodeling-associated protein 8:Extracellular domain	numeric
seq.10527.22	ATP-dependent RNA helicase A	numeric
seq.10528.2	Dipeptidase 1	numeric
seq.10530.8	Proteasome subunit beta type-6	numeric
seq.10531.18	GTPase NRas	numeric
seq.10534.40	Poly [ADP-ribose] polymerase 1:BRCA1 C-terminal:BRCA1 C-terminus domian	numeric
seq.10535.25	Cytochrome c oxidase subunit 6A2, mitochondrial	numeric
seq.10539.30	CD99 antigen-like protein 2	numeric
seq.10546.2	Thrombospondin-type laminin G domain and EAR repeat-containing protein	numeric
seq.10550.37	Bone morphogenetic protein receptor type-1B	numeric
seq.10551.7	Linker for activation of T-cells family member 1	numeric
seq.10552.88	NKG2-F type II integral membrane protein	numeric
seq.10553.8	Torsin-1A-interacting protein 2	numeric
seq.10554.23	Beta-galactosidase	numeric
seq.10557.6	Testis-expressed sequence 29 protein	numeric
seq.10558.26	Protocadherin-9	numeric
seq.10560.1	Integral membrane protein 2C:N-term	numeric
seq.10561.5	Peptidoglycan recognition protein 3	numeric
seq.10562.42	Neuropilin and tolloid-like protein 2	numeric
seq.10563.13	LysM and putative peptidoglycan-binding domain-containing protein 3	numeric
seq.10565.19	SLIT and NTRK-like protein 3	numeric
seq.10569.28	Microfibrillar-associated protein 2	numeric
seq.10571.14	Alpha-1,3-mannosyl-glycoprotein 2-beta-N-acetylglucosaminyltransferase	numeric
seq.10572.65	Cystatin-8	numeric
seq.10574.10	Beta-2-microglobulin	numeric
seq.10575.31	Poly(U)-binding-splicing factor PUF60	numeric
seq.10576.7	Plexin domain-containing protein 2:Extracellular domain	numeric
seq.10580.14	Surfactant-associated protein 2	numeric
seq.10582.36	Protein O-mannose kinase	numeric
seq.10583.1	Transmembrane protein 108	numeric
seq.10584.7	NADH dehydrogenase [ubiquinone] iron-sulfur protein 4, mitochondrial	numeric
seq.10588.39	Lactosylceramide alpha-2,3-sialyltransferase	numeric
seq.10589.7	Retinoic acid early transcript 1L protein	numeric
seq.10600.24	Calmegin	numeric
seq.10603.1	Histatin-3	numeric
seq.10605.22	Adipocyte plasma membrane-associated protein	numeric
seq.10606.34	Torsin-1A-interacting protein 1:Perinuclear domain	numeric
seq.10608.9	Histatin-1	numeric
seq.10612.18	Procollagen-lysine,2-oxoglutarate 5-dioxygenase 3	numeric
seq.10613.33	Protein CASC4	numeric
seq.10615.18	Myelin protein P0	numeric
seq.10616.67	Podocalyxin-like protein 2	numeric
seq.10618.190	Low-density lipoprotein receptor-related protein 2	numeric
seq.10620.21	Beta-microseminoprotein	numeric
seq.10621.26	Protein Largen	numeric
seq.10623.19	Mucin-1:region 1	numeric
seq.10624.45	Serine protease inhibitor Kazal-type 13	numeric
seq.10626.116	Alpha-N-acetylgalactosaminide alpha-2,6-sialyltransferase 3	numeric
seq.10627.87	Amyloid-like protein 2	numeric
seq.10630.5	Oxidoreductase HTATIP2	numeric
seq.10631.9	Membrane-associated progesterone receptor component 2	numeric
seq.10636.1	Cell surface glycoprotein CD200 receptor 1:Isoform 4, Cytoplasmic Domain	numeric
seq.10637.50	UPF0577 protein KIAA1324:Extracellular domain	numeric
seq.10638.1	TERF1-interacting nuclear factor 2	numeric
seq.10643.16	Noelin-3:Isoform 2, C-term	numeric
seq.10647.18	Activating signal cointegrator 1 complex subunit 1	numeric
seq.10663.42	Insulin-induced gene 1 protein	numeric
seq.10666.7	N-acetylglucosamine-1-phosphotransferase subunit gamma	numeric
seq.10667.78	Uncharacterized protein C1orf185	numeric
seq.10668.5	Syntaxin-4	numeric
seq.10670.26	Semaphorin-3E	numeric
seq.10672.75	Pulmonary surfactant-associated protein B	numeric
seq.10675.223	Thioredoxin-related transmembrane protein 2	numeric
seq.10677.9	NADH dehydrogenase [ubiquinone] 1 beta subcomplex subunit 4	numeric
seq.10693.43	Killer cell lectin-like receptor subfamily G member 2:C-term	numeric
seq.10695.12	Protein WFDC10B	numeric
seq.10699.52	Prolow-density lipoprotein receptor-related protein 1	numeric
seq.10700.10	Immunoglobulin superfamily member 11:Cytoplasmic domain	numeric
seq.10702.1	Collagen alpha-1(XXVIII) chain	numeric
seq.10703.203	Sin3 histone deacetylase corepressor complex component SDS3	numeric
seq.10704.91	Lymphoid-restricted membrane protein	numeric
seq.10705.14	Alpha-N-acetylgalactosaminide alpha-2,6-sialyltransferase 3	numeric
seq.10708.3	Progonadoliberin-2	numeric
seq.10710.23	Zona pellucida-binding protein 2	numeric
seq.10713.151	CMRF35-like molecule 7	numeric
seq.10714.7	Angiotensin-converting enzyme	numeric
seq.10716.35	26S proteasome non-ATPase regulatory subunit 5	numeric
seq.10721.76	Heat shock 70 kDa protein 1A	numeric
seq.10722.13	Tyrosine-protein kinase SYK:Protein kinase domain	numeric
seq.10731.10	Heparan sulfate glucosamine 3-O-sulfotransferase 5	numeric
seq.10734.339	Galactose-3-O-sulfotransferase 2	numeric
seq.10737.96	Leukocyte elastase inhibitor	numeric
seq.10738.11	Fibulin-5	numeric
seq.10741.22	Macrophage colony-stimulating factor 1	numeric
seq.10743.13	SLIT and NTRK-like protein 1	numeric
seq.10746.24	Dickkopf-related protein 3	numeric
seq.10748.216	Protocadherin beta-2	numeric
seq.10749.18	Heat shock 70 kDa protein 1A	numeric
seq.10752.8	Chromodomain Y-like protein 2	numeric
seq.10753.31	Disintegrin and metalloproteinase domain-containing protein 7	numeric
seq.10754.113	Prokineticin-2	numeric
seq.10756.34	Urocortin-3	numeric
seq.10758.2	Keratocan	numeric
seq.10760.107	Glutamate receptor 4	numeric
seq.10761.5	Transmembrane emp24 domain-containing protein 2	numeric
seq.10762.2	Killer cell lectin-like receptor subfamily G member 2:N-term	numeric
seq.10767.52	G-protein coupled receptor 64	numeric
seq.10772.21	Chondroitin sulfate N-acetylgalactosaminyltransferase 2	numeric
seq.10780.10	Ras-related protein Rab-3D	numeric
seq.10781.19	C-type lectin domain family 4 member G	numeric
seq.10785.8	Leucine-rich repeat-containing protein 52	numeric
seq.10798.4	CMRF35-like molecule 2	numeric
seq.10800.15	Serpin H1	numeric
seq.10801.11	Ephrin-A2	numeric
seq.10803.22	Heat shock 70 kDa protein 1A	numeric
seq.10809.14	Killer cell lectin-like receptor subfamily B member 1	numeric
seq.10814.7	T-cell surface glycoprotein CD1a	numeric
seq.10815.2	Intracellular hyaluronan-binding protein 4	numeric
seq.10816.150	Paired immunoglobulin-like type 2 receptor alpha isoform FDF03-M14	numeric
seq.10817.26	TOMM20-like protein 1	numeric
seq.10818.36	Sphingomyelin phosphodiesterase	numeric
seq.10819.108	Fibulin-1	numeric
seq.10825.12	V-set and immunoglobulin domain-containing protein 10	numeric
seq.10827.67	Leucine-rich repeat and immunoglobulin-like domain-containing nogo receptor-interacting protein 3	numeric
seq.10830.5	EF-hand calcium-binding domain-containing protein 14:N-term	numeric
seq.10832.24	Beta-1,4-galactosyltransferase 6	numeric
seq.10833.64	Hedgehog-interacting protein	numeric
seq.10835.25	Alpha-1,4-N-acetylglucosaminyltransferase	numeric
seq.10842.7	Beta-1,3-galactosyl-O-glycosyl-glycoprotein beta-1,6-N-acetylglucosaminyltransferase 4	numeric
seq.10847.1	Sialic acid-binding Ig-like lectin 15	numeric
seq.10848.137	Butyrophilin-like protein 3	numeric
seq.10851.77	Interleukin-27 subunit beta	numeric
seq.10852.114	Heterogeneous nuclear ribonucleoprotein D-like	numeric
seq.10854.15	Beta-1,3-galactosyl-O-glycosyl-glycoprotein beta-1,6-N-acetylglucosaminyltransferase 4	numeric
seq.10855.55	Plexin-B2	numeric
seq.10866.60	Serine/threonine-protein phosphatase 4 regulatory subunit 3A	numeric
seq.10870.32	Spastin:Microtubule interacting and trafficking domain	numeric
seq.10876.300	BRCA1-associated ATM activator 1	numeric
seq.10880.38	Protein FAM163B	numeric
seq.10882.12	Desmocollin-1	numeric
seq.10885.36	Bombesin receptor-activated protein C6orf89	numeric
seq.10889.2	Melanocortin-2 receptor accessory protein 2	numeric
seq.10890.135	Lactase-like protein	numeric
seq.10892.8	Oncostatin-M-specific receptor subunit beta	numeric
seq.10894.25	Secretagogin	numeric
seq.10895.28	Transmembrane protease serine 11B	numeric
seq.10900.272	Stathmin-2	numeric
seq.10902.53	Retroviral-like aspartic protease 1	numeric
seq.10903.50	Syntaxin-8	numeric
seq.10907.116	Neurotrimin	numeric
seq.10908.2	Polypeptide N-acetylgalactosaminyltransferase 13	numeric
seq.10910.6	Carcinoembryonic antigen-related cell adhesion molecule 4	numeric
seq.10916.44	Secretory phospholipase A2 receptor	numeric
seq.10917.40	Guanine nucleotide-binding protein G(I)/G(S)/G(O) subunit gamma-T2	numeric
seq.10924.258	Neuferricin	numeric
seq.10933.107	Calcium-binding protein 8	numeric
seq.10938.13	Lymphocyte function-associated antigen 3	numeric
seq.10939.16	Pleckstrin homology domain-containing family A member 4	numeric
seq.10940.25	Sarcalumenin	numeric
seq.10945.11	Syntaxin-6	numeric
seq.10948.14	Phospholipase D3	numeric
seq.10949.59	60S acidic ribosomal protein P2	numeric
seq.10953.14	C-type lectin domain family 2 member A	numeric
seq.10955.4	C-type lectin domain family 10 member A	numeric
seq.10956.82	Glycine cleavage system H protein, mitochondrial	numeric
seq.10959.125	BET1-like protein	numeric
seq.10961.15	Retinoic acid receptor responder protein 3	numeric
seq.10966.1	Alpha-2-HS-glycoprotein	numeric
seq.10967.12	Prolactin	numeric
seq.10970.3	Ecto-ADP-ribosyltransferase 3	numeric
seq.10974.20	Serine protease inhibitor Kazal-type 7	numeric
seq.10975.59	Mucin-like protein 1	numeric
seq.10976.44	Mucin-1:region 3	numeric
seq.10977.55	Unique cartilage matrix-associated protein	numeric
seq.10978.39	Growth hormone variant	numeric
seq.10980.11	Acetylcholinesterase	numeric
seq.10981.56	Pro-neuregulin-3, membrane-bound isoform	numeric
seq.10990.21	Leucine-rich repeat serine/threonine-protein kinase 2	numeric
seq.11067.13	Osteocalcin	numeric
seq.11071.1	Interleukin-5	numeric
seq.11081.1	Glycerol-3-phosphate dehydrogenase [NAD(+)], cytoplasmic	numeric
seq.11083.23	Gamma-enolase	numeric
seq.11089.7	Immunoglobulin A	numeric
seq.11094.104	Galectin-10	numeric
seq.11096.57	HemK methyltransferase family member 2	numeric
seq.11098.1	Pyridoxal kinase	numeric
seq.11101.18	Toll-like receptor 4	numeric
seq.11102.22	Regenerating islet-derived protein 4	numeric
seq.11103.24	Heat shock protein beta-1	numeric
seq.11104.13	Chitinase-3-like protein 1	numeric
seq.11105.171	Alpha-enolase	numeric
seq.11107.25	Teneurin-3	numeric
seq.11109.56	Sushi, von Willebrand factor type A, EGF and pentraxin domain-containing protein 1:Sushi 15-18	numeric
seq.11110.4	Transmembrane protein 119	numeric
seq.11112.18	Protein kish-A	numeric
seq.11116.16	Uncharacterized protein C11orf87	numeric
seq.11117.2	Spermatogenesis-associated protein 20	numeric
seq.11118.107	Ras-related protein Rab-17	numeric
seq.11120.49	N-acetyltransferase 14	numeric
seq.11121.56	Brorin	numeric
seq.11122.97	Maspardin	numeric
seq.11126.102	Triple functional domain protein	numeric
seq.11128.29	Transmembrane protein 132C:Cytoplasmic domain	numeric
seq.11129.66	Bone morphogenetic protein 15	numeric
seq.11130.158	Voltage-dependent L-type calcium channel subunit beta-4	numeric
seq.11134.30	Peptide chain release factor 1-like, mitochondrial	numeric
seq.11135.5	39S ribosomal protein L55, mitochondrial	numeric
seq.11137.43	Cytokine receptor common subunit beta:Cytoplasmic domain	numeric
seq.11138.16	Runt-related transcription factor 3	numeric
seq.11140.56	Collagen alpha-1(I) chain:C-term propeptide	numeric
seq.11142.11	Angiopoietin-related protein 1:C-Term, Fibrinogen domian	numeric
seq.11143.32	Noelin-3:Isoform 2, N-term	numeric
seq.11144.10	Beta-defensin 116	numeric
seq.11145.72	UPF0606 protein KIAA1549L	numeric
seq.11146.4	T-box transcription factor TBX22	numeric
seq.11147.17	Trem-like transcript 1 protein:immunoreceptor tyrosine-based inhibition motif	numeric
seq.11149.3	Toll-like receptor 1:Cytoplasmic domain	numeric
seq.11150.3	Collagen alpha-1(VI) chain	numeric
seq.11152.46	Kallikrein-13	numeric
seq.11154.3	Nuclear factor erythroid 2-related factor 1	numeric
seq.11155.16	Collagen alpha-5(VI) chain	numeric
seq.11157.35	Heat shock 70 kDa protein 1A	numeric
seq.11158.40	Bicaudal D-related protein 1	numeric
seq.11159.14	Mitochondrial ubiquitin ligase activator of NFKB 1:Cytoplasmic domain	numeric
seq.11160.56	RING finger protein 122	numeric
seq.11161.5	Spartin	numeric
seq.11162.37	Equatorin	numeric
seq.11163.7	Protein FAM162B	numeric
seq.11164.7	Teneurin-2	numeric
seq.11167.6	Myotubularin-related protein 1	numeric
seq.11168.3	Multiple epidermal growth factor-like domains protein 10	numeric
seq.11171.25	Filamin-A:Calponin Homology 2	numeric
seq.11173.29	Allergin-1	numeric
seq.11174.8	Thrombospondin type-1 domain-containing protein 7A:Thrombospondin type-1 domain 6	numeric
seq.11175.45	Lysophosphatidylcholine acyltransferase 2	numeric
seq.11177.16	Keratin, type II cytoskeletal 5	numeric
seq.11178.21	Sushi, von Willebrand factor type A, EGF and pentraxin domain-containing protein 1:EGF-like domains 4-6	numeric
seq.11179.7	Testis-specific serine/threonine-protein kinase 1	numeric
seq.11180.17	SWI/SNF complex subunit SMARCC1	numeric
seq.11184.51	Chromogranin-A	numeric
seq.11185.145	GTP cyclohydrolase 1	numeric
seq.11186.12	Transmembrane protein 52	numeric
seq.11187.11	C-type lectin domain family 12 member A	numeric
seq.11190.129	ATP-dependent zinc metalloprotease YME1L1	numeric
seq.11192.168	Tubulointerstitial nephritis antigen-like	numeric
seq.11193.27	Hepatocyte nuclear factor 1-alpha	numeric
seq.11194.6	Signaling threshold-regulating transmembrane adapter 1	numeric
seq.11196.31	Collagen alpha-3(VI) chain:Bovine pancreatic trypsin inhibitor/Kunitz inhibitor domain, isoform 1	numeric
seq.11198.37	Cyclic AMP-responsive element-binding protein 3-like protein 1	numeric
seq.11200.52	Complement component C1q receptor	numeric
seq.11201.19	tRNA pseudouridine synthase A, mitochondrial	numeric
seq.11202.70	T-box transcription factor TBX5	numeric
seq.11203.97	Pyruvate kinase PKLR	numeric
seq.11204.80	Coxsackievirus and adenovirus receptor	numeric
seq.11205.10	Integrin beta-7	numeric
seq.11207.3	Macrophage scavenger receptor types I and II:Cytoplasmic domain	numeric
seq.11208.15	N-acetylglucosamine-1-phosphodiester alpha-N-acetylglucosaminidase	numeric
seq.11211.7	Tubulin-specific chaperone E	numeric
seq.11212.7	Thioredoxin domain-containing protein 5	numeric
seq.11214.40	DnaJ homolog subfamily B member 9	numeric
seq.11215.6	Cadherin-15:Cytoplasmic domain	numeric
seq.11217.16	C-terminal-binding protein 1	numeric
seq.11218.84	Thiopurine S-methyltransferase	numeric
seq.11219.95	Fibroblast growth factor-binding protein 3	numeric
seq.11220.53	Uncharacterized protein C10orf105	numeric
seq.11223.1	Transmembrane protein 154	numeric
seq.11226.16	Ubiquitin-protein ligase E3A	numeric
seq.11227.31	Transducin beta-like protein 2	numeric
seq.11228.37	Protein RIC-3	numeric
seq.11229.16	Serine/threonine-protein kinase/endoribonuclease IRE1	numeric
seq.11231.12	Adrenodoxin-like protein, mitochondrial	numeric
seq.11232.46	Transcobalamin-1	numeric
seq.11237.49	Procollagen C-endopeptidase enhancer 1	numeric
seq.11239.49	Transmembrane protease serine 6	numeric
seq.11241.8	Argininosuccinate lyase	numeric
seq.11242.33	Protein-glutamine gamma-glutamyltransferase K	numeric
seq.11243.90	Adhesion G-protein coupled receptor F1	numeric
seq.11245.43	Filamin-A:Calponin Homology 1	numeric
seq.11246.3	BPI fold-containing family B member 1	numeric
seq.11247.20	N-acetylglutamate synthase, mitochondrial	numeric
seq.11248.43	Uroporphyrinogen-III synthase	numeric
seq.11252.30	Leucine-rich repeat and calponin homology domain-containing protein 4:Calponin Homology	numeric
seq.11254.13	Papilin	numeric
seq.11257.1	Dihydropteridine reductase	numeric
seq.11258.41	Mucosal addressin cell adhesion molecule 1	numeric
seq.11260.47	SUN domain-containing protein 5	numeric
seq.11262.39	TraB domain-containing protein	numeric
seq.11263.57	Calsequestrin-1	numeric
seq.11264.33	Xanthine dehydrogenase/oxidase	numeric
seq.11265.8	Retinal dehydrogenase 1	numeric
seq.11266.8	P-selectin glycoprotein ligand 1:Extracellular domain	numeric
seq.11270.17	Coiled-coil-helix-coiled-coil-helix domain-containing protein 10, mitochondrial	numeric
seq.11273.176	Glutathione S-transferase theta-2B	numeric
seq.11275.94	Low-density lipoprotein receptor-related protein 1B	numeric
seq.11277.23	Cyclic AMP-dependent transcription factor ATF-6 alpha	numeric
seq.11278.4	Collagen alpha-2(XI) chain	numeric
seq.11279.42	Gamma-aminobutyric acid type B receptor subunit 1	numeric
seq.11280.6	Glutamate decarboxylase 1	numeric
seq.11281.6	Growth factor receptor-bound protein 7	numeric
seq.11282.16	Macrophage scavenger receptor types I and II:Extracellular domain	numeric
seq.11283.13	DDB1- and CUL4-associated factor 5	numeric
seq.11284.24	Leukocyte-associated immunoglobulin-like receptor 1	numeric
seq.11285.8	Hematopoietic progenitor cell antigen CD34	numeric
seq.11286.78	Selenoprotein S	numeric
seq.11287.14	Cytochrome b5	numeric
seq.11288.26	Cytosolic purine 5'-nucleotidase	numeric
seq.11289.31	Casein kinase I isoform delta	numeric
seq.11292.13	Scavenger receptor class A member 3:region 2	numeric
seq.11293.14	Leucine-rich repeat neuronal protein 1:Cytoplasmic domain	numeric
seq.11294.7	Transmembrane and coiled-coil domains protein 3:region 2	numeric
seq.11297.54	Neurogenic locus notch homolog protein 2	numeric
seq.11300.32	Sortilin	numeric
seq.11302.237	Tenascin-R	numeric
seq.11303.7	Deoxynucleoside triphosphate triphosphohydrolase SAMHD1	numeric
seq.11307.33	NEDD4-like E3 ubiquitin-protein ligase WWP1	numeric
seq.11308.8	Cyclic AMP-responsive element-binding protein 3-like protein 4	numeric
seq.11310.8	Desmoglein-3	numeric
seq.11311.79	V(D)J recombination-activating protein 1	numeric
seq.11312.40	Mismatch repair endonuclease PMS2	numeric
seq.11313.100	Pterin-4-alpha-carbinolamine dehydratase	numeric
seq.11315.148	Protein phosphatase 1D	numeric
seq.11318.20	Apolipoprotein A-V	numeric
seq.11319.106	Double-strand break repair protein MRE11	numeric
seq.11320.29	E3 ubiquitin-protein ligase CHFR	numeric
seq.11324.3	Peroxidasin-like protein	numeric
seq.11325.8	Protein BTG2	numeric
seq.11327.56	Dual specificity protein kinase CLK2	numeric
seq.11328.9	U6 snRNA phosphodiesterase	numeric
seq.11330.15	Casein kinase II subunit beta	numeric
seq.11333.82	Rho GTPase-activating protein 25	numeric
seq.11334.7	Leukocyte immunoglobulin-like receptor subfamily B member 3	numeric
seq.11336.9	Fanconi anemia group F protein	numeric
seq.11338.49	Tyrosine-protein kinase BLK	numeric
seq.11342.59	Plexin domain-containing protein 2:Cytoplasmic domain	numeric
seq.11347.9	Transaldolase	numeric
seq.11348.132	Prolyl 4-hydroxylase subunit alpha-2	numeric
seq.11350.30	E3 ubiquitin-protein ligase CHIP	numeric
seq.11351.233	Non-homologous end-joining factor 1	numeric
seq.11352.42	Titin	numeric
seq.11353.143	Mothers against decapentaplegic homolog 2	numeric
seq.11354.21	1-phosphatidylinositol 4,5-bisphosphate phosphodiesterase beta-1	numeric
seq.11355.10	Eukaryotic translation initiation factor 5A-2	numeric
seq.11356.19	Protein DGCR14	numeric
seq.11358.15	Growth factor receptor-bound protein 10	numeric
seq.11360.39	Ribonucleoside-diphosphate reductase large subunit	numeric
seq.11361.73	Thymidine phosphorylase	numeric
seq.11363.58	Aquaporin-4	numeric
seq.11364.18	Mitofusin-1	numeric
seq.11365.17	Teneurin-4	numeric
seq.11368.32	Adenylate kinase 2, mitochondrial	numeric
seq.11369.23	Alcohol dehydrogenase class-3	numeric
seq.11370.20	72 kDa inositol polyphosphate 5-phosphatase	numeric
seq.11371.1	Probable G-protein coupled receptor 101	numeric
seq.11372.2	Zinc finger protein 18	numeric
seq.11375.49	Forkhead box protein L2	numeric
seq.11377.19	Alcohol dehydrogenase class 4 mu/sigma chain	numeric
seq.11378.37	Tyrosine-protein kinase SYK:Src Homology domain	numeric
seq.11380.84	RNA-binding protein 24	numeric
seq.11381.56	Ribose-phosphate pyrophosphokinase 1	numeric
seq.11382.5	Biliverdin reductase A	numeric
seq.11383.41	Keratin, type II cytoskeletal 7	numeric
seq.11387.3	Cyclic AMP-dependent transcription factor ATF-6 beta	numeric
seq.11388.75	WAP four-disulfide core domain protein 2	numeric
seq.11390.24	Carbonic anhydrase-related protein	numeric
seq.11391.69	Mevalonate kinase	numeric
seq.11395.5	Protein-tyrosine kinase 2-beta:4.1 protein, ezrin, radixin, moesin domain	numeric
seq.11396.39	Dynein intermediate chain 1, axonemal	numeric
seq.11401.181	E3 ubiquitin-protein ligase RNF146	numeric
seq.11402.17	Histone-lysine N-methyltransferase 2C	numeric
seq.11405.150	Caspase recruitment domain-containing protein 9	numeric
seq.11406.82	Isobutyryl-CoA dehydrogenase, mitochondrial	numeric
seq.11407.57	Phospholipid scramblase 3	numeric
seq.11416.23	F-box/LRR-repeat protein 4:Leucine-rich repeats 4 and 5	numeric
seq.11421.10	EH domain-containing protein 4	numeric
seq.11422.2	Homeobox protein DLX-3	numeric
seq.11424.4	Fumarylacetoacetase	numeric
seq.11425.31	RUN and FYVE domain-containing protein 1	numeric
seq.11428.31	PDZ and LIM domain protein 1	numeric
seq.11429.80	Heterogeneous nuclear ribonucleoproteins C1/C2	numeric
seq.11430.49	E3 ubiquitin-protein ligase DTX1	numeric
seq.11431.235	ATP-dependent DNA helicase Q1	numeric
seq.11432.11	Polyglutamine-binding protein 1	numeric
seq.11433.11	Tectonic-2	numeric
seq.11436.6	Alpha-internexin	numeric
seq.11438.6	DnaJ homolog subfamily B member 2	numeric
seq.11439.88	Rhophilin-2	numeric
seq.11440.58	Suppressor of cytokine signaling 3	numeric
seq.11441.11	Glycogen phosphorylase, liver form	numeric
seq.11442.1	Delta and Notch-like epidermal growth factor-related receptor:Cytoplasmic domain	numeric
seq.11444.49	DNA-directed RNA polymerase III subunit RPC6	numeric
seq.11448.34	Galactokinase	numeric
seq.11449.22	F-actin-capping protein subunit alpha-1	numeric
seq.11450.110	Protein disulfide-isomerase	numeric
seq.11454.87	Eukaryotic translation initiation factor 3 subunit G	numeric
seq.11456.2	Melanoma-associated antigen B10	numeric
seq.11457.53	UDP-glucose 4-epimerase	numeric
seq.11458.30	Poly(rC)-binding protein 1	numeric
seq.11459.81	RNA polymerase II elongation factor ELL	numeric
seq.11462.8	RNA binding protein fox-1 homolog 2	numeric
seq.11464.9	Transcription factor RelB	numeric
seq.11465.4	Probable G-protein coupled receptor 135	numeric
seq.11468.15	Probable RNA-binding protein 19	numeric
seq.11476.43	Vacuolar protein sorting-associated protein 4A	numeric
seq.11480.1	Aldehyde dehydrogenase, dimeric NADP-preferring	numeric
seq.11481.25	Hepatitis A virus cellular receptor 2	numeric
seq.11486.26	Zinc finger protein 174	numeric
seq.11487.4	Testican-1	numeric
seq.11490.42	Ubiquitin-like protein 4A	numeric
seq.11493.169	Dynein light chain 2, cytoplasmic	numeric
seq.11494.4	RNA polymerase II elongation factor ELL2	numeric
seq.11510.31	Apolipoprotein L1	numeric
seq.11510.51	Apolipoprotein L1	numeric
seq.11513.92	ADP-ribosyl cyclase/cyclic ADP-ribose hydrolase 1	numeric
seq.11514.196	CD59 glycoprotein	numeric
seq.11516.7	Fatty acid-binding protein, liver	numeric
seq.11530.37	Porphobilinogen deaminase	numeric
seq.11531.24	V-type immunoglobulin domain-containing suppressor of T-cell activation:Cytoplasmic domain	numeric
seq.11534.6	Leucine-rich repeat, immunoglobulin-like domain and transmembrane domain-containing protein 3	numeric
seq.11536.9	Histone H2A deubiquitinase MYSM1	numeric
seq.11537.12	Transferrin receptor protein 2	numeric
seq.11538.216	Malonyl-CoA decarboxylase, mitochondrial	numeric
seq.11539.4	ATP synthase subunit f, mitochondrial	numeric
seq.11540.37	Forkhead box protein O3	numeric
seq.11542.11	Transmembrane protein 230	numeric
seq.11543.84	LIM domain and actin-binding protein 1	numeric
seq.11544.39	PHD finger protein 3	numeric
seq.11545.9	Tumor necrosis factor receptor superfamily member 14	numeric
seq.11546.7	Cytoglobin	numeric
seq.11547.84	Muscle, skeletal receptor tyrosine-protein kinase	numeric
seq.11548.84	M-phase inducer phosphatase 1	numeric
seq.11549.6	Insulin gene enhancer protein ISL-1	numeric
seq.11551.16	SWI/SNF-related matrix-associated actin-dependent regulator of chromatin subfamily E member 1-related	numeric
seq.11556.19	ADP-ribosylation factor GTPase-activating protein 1	numeric
seq.11557.3	E3 ubiquitin-protein ligase SMURF1	numeric
seq.11560.76	Nuclear factor of activated T-cells, cytoplasmic 4	numeric
seq.11562.9	DNA polymerase epsilon subunit 2	numeric
seq.11563.51	Synaptotagmin-like protein 4:Ca2+-dependent membrane-targeting module 2	numeric
seq.11565.58	Zinc finger protein 23	numeric
seq.11566.48	Keratin, type II cytoskeletal 72	numeric
seq.11567.23	Zinc finger protein 10	numeric
seq.11568.2	Peptidyl-prolyl cis-trans isomerase FKBP1B	numeric
seq.11570.94	B-cell receptor-associated protein 29	numeric
seq.11571.75	NKG2-E type II integral membrane protein:Isoform E, Extracellular domain	numeric
seq.11572.4	Dynamin-2	numeric
seq.11573.3	Serine/arginine-rich splicing factor 6	numeric
seq.11582.63	DnaJ homolog subfamily A member 2	numeric
seq.11586.2	Leucine-rich repeat neuronal protein 1:Extracellular domain	numeric
seq.11587.5	MAX gene-associated protein	numeric
seq.11590.5	Probable RNA-binding protein 23	numeric
seq.11591.43	Protein regulator of cytokinesis 1	numeric
seq.11592.1	ELAV-like protein 1	numeric
seq.11593.21	C-X-C motif chemokine 9	numeric
seq.11596.47	Zinc finger protein 75D	numeric
seq.11601.26	ATP-dependent RNA helicase DHX8	numeric
seq.11602.12	Copine-1:Von Willebrand factor type A domain	numeric
seq.11606.22	DnaJ homolog subfamily B member 6	numeric
seq.11607.15	Bromodomain-containing protein 1	numeric
seq.11608.5	Microtubule-associated proteins 1A/1B light chain 3B	numeric
seq.11614.29	Enhancer of rudimentary homolog	numeric
seq.11615.16	Dual adapter for phosphotyrosine and 3-phosphotyrosine and 3-phosphoinositide	numeric
seq.11616.9	Heat shock factor protein 1	numeric
seq.11617.1	Integrin alpha-L	numeric
seq.11618.83	Transcriptional activator Myb	numeric
seq.11626.7	Ubiquitin-conjugating enzyme E2 variant 1	numeric
seq.11629.36	TNF receptor-associated factor 4	numeric
seq.11633.89	Activator of 90 kDa heat shock protein ATPase homolog 1	numeric
seq.11634.32	Regulator of G-protein signaling 10	numeric
seq.11636.33	Transgelin-2	numeric
seq.11638.42	Beta-1,3-galactosyltransferase 2	numeric
seq.11643.73	E3 ubiquitin-protein ligase DTX3L	numeric
seq.11645.9	Prolyl 4-hydroxylase subunit alpha-1	numeric
seq.11646.4	Carbohydrate sulfotransferase 9	numeric
seq.11647.6	Frizzled-10:Cytoplasmic domain	numeric
seq.11649.3	Stromal membrane-associated protein 1	numeric
seq.11651.24	Protein argonaute-1	numeric
seq.11653.69	Sodium- and chloride-dependent glycine transporter 1	numeric
seq.11654.77	Neurensin-1	numeric
seq.11656.110	Ena/VASP-like protein	numeric
seq.11657.86	Suppressor of cytokine signaling 7	numeric
seq.11659.31	Clathrin interactor 1	numeric
seq.11661.11	NACHT, LRR and PYD domains-containing protein 1	numeric
seq.11664.32	ADP-ribosylation factor GTPase-activating protein 2	numeric
seq.11666.72	Regulator of G-protein signaling 8	numeric
seq.11667.29	Tensin-2	numeric
seq.11669.39	Solute carrier organic anion transporter family member 5A1	numeric
seq.11670.18	Probable G-protein coupled receptor 101	numeric
seq.11671.19	Peregrin	numeric
seq.11672.17	Kinesin-like protein KIF16B	numeric
seq.11677.17	Probable palmitoyltransferase ZDHHC14	numeric
seq.11678.105	Gap junction delta-2 protein	numeric
seq.11681.8	Arf-GAP domain and FG repeat-containing protein 1	numeric
seq.11682.7	Thioredoxin-interacting protein	numeric
seq.11683.19	ADP-ribosylation factor-binding protein GGA3	numeric
seq.11690.47	Anaphase-promoting complex subunit 7	numeric
seq.11692.21	SHC-transforming protein 4	numeric
seq.11696.7	Cellular retinoic acid-binding protein 2	numeric
seq.11699.16	Protein tyrosine phosphatase type IVA 2	numeric
seq.11708.2	Lipocalin-1	numeric
seq.11709.29	Carnitine O-palmitoyltransferase 1, muscle isoform	numeric
seq.11712.207	Protein unc-45 homolog A	numeric
seq.11715.1	POU domain, class 2, transcription factor 1	numeric
seq.11716.28	Leucine-rich repeat, immunoglobulin-like domain and transmembrane domain-containing protein 2	numeric
seq.11814.29	Hepatocyte growth factor receptor	numeric
seq.11816.84	Tyrosine-protein kinase JAK2	numeric
seq.11817.1	Ribosomal protein S6 kinase beta-1	numeric
seq.11825.27	Peroxisome proliferator-activated receptor gamma coactivator 1-alpha	numeric
seq.11827.7	Nuclear receptor ROR-gamma	numeric
seq.11830.48	Tyrosine-protein phosphatase non-receptor type 11	numeric
seq.11833.83	Frataxin, mitochondrial	numeric
seq.11836.144	Epithelial discoidin domain-containing receptor 1	numeric
seq.11837.7	Tumor necrosis factor receptor superfamily member 18	numeric
seq.11838.130	Piezo-type mechanosensitive ion channel component 1	numeric
seq.11851.21	Triggering receptor expressed on myeloid cells 2	numeric
seq.11872.9	Protocadherin gamma-B1	numeric
seq.11910.27	Homeobox protein DLX-4	numeric
seq.11911.13	Leucine-rich repeat-containing protein 4B:Cytoplasmic domain	numeric
seq.11926.23	Alpha- and gamma-adaptin-binding protein p34	numeric
seq.11934.9	Integrator complex subunit 3	numeric
seq.11949.25	Epidermal growth factor:Cytoplasmic domain	numeric
seq.11952.1	Immunoglobulin superfamily DCC subclass member 3:Cytoplasmic domain	numeric
seq.11955.1	Rho GTPase-activating protein 1:Rho-GTPase activating protein domain	numeric
seq.11967.23	Cellular retinoic acid-binding protein 1	numeric
seq.11969.5	Protein S100-A2	numeric
seq.11988.24	Receptor-type tyrosine-protein phosphatase H	numeric
seq.11989.35	ER membrane protein complex subunit 1	numeric
seq.12001.7	Tight junction protein ZO-1	numeric
seq.12008.3	T-cell antigen CD7	numeric
seq.12014.19	6-pyruvoyl tetrahydrobiopterin synthase	numeric
seq.12016.60	E3 ubiquitin-protein ligase CBL	numeric
seq.12018.84	Thiamin pyrophosphokinase 1	numeric
seq.12020.39	Bisphosphoglycerate mutase	numeric
seq.12022.12	Mothers against decapentaplegic homolog 4	numeric
seq.12030.82	Desmin	numeric
seq.12033.3	Mitotic checkpoint serine/threonine-protein kinase BUB1	numeric
seq.12034.28	Adenylyl cyclase-associated protein 1	numeric
seq.12041.33	Heat shock 70 kDa protein 1-like	numeric
seq.12046.51	TAR DNA-binding protein 43	numeric
seq.12077.32	Growth/differentiation factor 8	numeric
seq.12329.21	Ribosomal protein S6 kinase alpha-1	numeric
seq.12332.7	Eukaryotic elongation factor 2 kinase	numeric
seq.12333.87	Ribose-5-phosphate isomerase	numeric
seq.12334.25	Serine hydroxymethyltransferase, cytosolic	numeric
seq.12338.27	Pikachurin	numeric
seq.12340.17	Alanine--tRNA ligase, cytoplasmic	numeric
seq.12341.8	Dual specificity protein phosphatase 6	numeric
seq.12343.14	Arf-GAP with coiled-coil, ANK repeat and PH domain-containing protein 2	numeric
seq.12345.4	Anaphase-promoting complex subunit 10	numeric
seq.12347.29	Cerebral cavernous malformations 2 protein	numeric
seq.12348.46	Serine--tRNA ligase, mitochondrial	numeric
seq.12350.86	Protein C-ets-2	numeric
seq.12351.25	Signal transducer and activator of transcription 1-alpha/beta	numeric
seq.12352.70	Arrestin domain-containing protein 3	numeric
seq.12355.223	Ribosome-recycling factor, mitochondrial	numeric
seq.12356.65	Sorcin	numeric
seq.12357.41	Synaptosomal-associated protein 29	numeric
seq.12358.6	Immunoglobulin-binding protein 1	numeric
seq.12361.102	Ras-related protein R-Ras2	numeric
seq.12363.70	Tribbles homolog 2	numeric
seq.12365.108	RuvB-like 1	numeric
seq.12366.16	Gamma-crystallin D	numeric
seq.12367.52	Macoilin	numeric
seq.12368.18	Histone acetyltransferase KAT2B	numeric
seq.12370.30	Apolipoprotein F	numeric
seq.12372.50	Tropomyosin alpha-3 chain	numeric
seq.12373.73	Transformer-2 protein homolog beta	numeric
seq.12374.8	Platelet-activating factor acetylhydrolase IB subunit gamma	numeric
seq.12376.85	Cyclin-dependent kinase 4 inhibitor D	numeric
seq.12378.71	Tapasin	numeric
seq.12381.26	Carbonyl reductase [NADPH] 1	numeric
seq.12382.2	Probable ATP-dependent RNA helicase DDX58	numeric
seq.12384.92	COP9 signalosome complex subunit 7b	numeric
seq.12385.4	Calpain-3	numeric
seq.12386.11	Aminopeptidase B	numeric
seq.12387.7	PDZ and LIM domain protein 4	numeric
seq.12389.4	Origin recognition complex subunit 6	numeric
seq.12391.27	PDZ domain-containing protein 7	numeric
seq.12392.30	ADP-ribosylation factor-like protein 1	numeric
seq.12394.53	Transmembrane protein C16orf54	numeric
seq.12395.86	Aspartate--tRNA ligase, mitochondrial	numeric
seq.12396.19	3-hydroxyisobutyryl-CoA hydrolase, mitochondrial	numeric
seq.12398.15	Paired box protein Pax-4	numeric
seq.12399.194	Coiled-coil domain-containing protein 50	numeric
seq.12400.25	Ubiquitin-conjugating enzyme E2 T	numeric
seq.12401.3	AMSH-like protease	numeric
seq.12403.30	Ras-related protein Rab-39B	numeric
seq.12406.119	GTP-binding protein Di-Ras3	numeric
seq.12408.333	Ras-related protein Rab-22A	numeric
seq.12409.90	Ras-related protein Rab-7b	numeric
seq.12411.60	Protein max	numeric
seq.12414.31	14-3-3 protein beta/alpha	numeric
seq.12415.122	Endothelial differentiation-related factor 1	numeric
seq.12417.46	EKC/KEOPS complex subunit TPRKB	numeric
seq.12420.10	Glycerol-3-phosphate dehydrogenase 1-like protein	numeric
seq.12422.143	Arachidonate 15-lipoxygenase B	numeric
seq.12423.38	APOBEC1 complementation factor	numeric
seq.12424.107	Thymocyte nuclear protein 1	numeric
seq.12425.104	ADP-ribosylation factor 6	numeric
seq.12426.19	MOB kinase activator 1A	numeric
seq.12427.8	M-phase inducer phosphatase 2	numeric
seq.12428.2	Lysophospholipase-like protein 1	numeric
seq.12430.78	Polyadenylate-binding protein-interacting protein 1	numeric
seq.12431.13	Protein pelota homolog	numeric
seq.12432.23	Calcyclin-binding protein	numeric
seq.12433.8	ADP-ribosylation factor-like protein 11	numeric
seq.12434.25	IST1 homolog	numeric
seq.12436.84	Glutathione S-transferase omega-1	numeric
seq.12437.18	Serine/threonine-protein kinase ULK3	numeric
seq.12438.127	DNA-3-methyladenine glycosylase	numeric
seq.12439.67	Interferon regulatory factor 9	numeric
seq.12442.4	Rho-related GTP-binding protein RhoD	numeric
seq.12444.39	Nuclear receptor subfamily 5 group A member 2	numeric
seq.12445.50	Ankyrin repeat domain-containing protein 27	numeric
seq.12446.49	Glutathione S-transferase A1	numeric
seq.12448.246	Glycylpeptide N-tetradecanoyltransferase 1	numeric
seq.12449.16	Peptidyl-prolyl cis-trans isomerase H	numeric
seq.12450.42	Phosphomevalonate kinase	numeric
seq.12451.62	Transcription regulator protein BACH1	numeric
seq.12452.32	Histone-lysine N-methyltransferase SUV420H2	numeric
seq.12453.161	Nuclear RNA export factor 1	numeric
seq.12454.105	N-terminal Xaa-Pro-Lys N-methyltransferase 1	numeric
seq.12455.48	Myoneurin	numeric
seq.12456.5	6-phosphofructo-2-kinase/fructose-2,6-bisphosphatase 3	numeric
seq.12457.10	1,2-dihydroxy-3-keto-5-methylthiopentene dioxygenase	numeric
seq.12458.79	Calcineurin B homologous protein 1	numeric
seq.12459.13	Pleckstrin homology domain-containing family A member 1	numeric
seq.12460.18	Proteasome subunit alpha type-7	numeric
seq.12461.8	NAD-dependent protein deacylase sirtuin-5, mitochondrial	numeric
seq.12462.20	Histone-lysine N-methyltransferase SETMAR	numeric
seq.12463.7	Kelch-like protein 13	numeric
seq.12466.7	Heterogeneous nuclear ribonucleoprotein A1	numeric
seq.12469.19	Microtubule-associated protein RP/EB family member 1	numeric
seq.12471.47	Double-stranded RNA-binding protein Staufen homolog 1	numeric
seq.12473.48	BTB/POZ domain-containing protein KCTD5	numeric
seq.12475.48	Chloride intracellular channel protein 5	numeric
seq.12476.50	Fructose-2,6-bisphosphatase TIGAR	numeric
seq.12477.42	Translin	numeric
seq.12478.15	60S ribosomal protein L30	numeric
seq.12479.50	cAMP-dependent protein kinase type I-beta regulatory subunit	numeric
seq.12480.9	OTU domain-containing protein 5	numeric
seq.12482.5	Nucleosome-remodeling factor subunit BPTF	numeric
seq.12483.62	Nuclear receptor ROR-beta	numeric
seq.12484.67	Phosphatidylinositol transfer protein beta isoform	numeric
seq.12486.8	Glutaredoxin-2, mitochondrial	numeric
seq.12488.9	Malignant T-cell-amplified sequence 1	numeric
seq.12490.92	Ragulator complex protein LAMTOR3	numeric
seq.12491.23	Chloride intracellular channel protein 4	numeric
seq.12493.42	Ubiquitin thioesterase OTUB2	numeric
seq.12494.99	Gamma-aminobutyric acid receptor-associated protein-like 2	numeric
seq.12497.29	Tudor-interacting repair regulator protein	numeric
seq.12498.12	Tax1-binding protein 3	numeric
seq.12499.108	Endophilin-A1	numeric
seq.12500.88	SUMO-activating enzyme subunit 2	numeric
seq.12501.10	Tubulin-specific chaperone A	numeric
seq.12503.5	Ovarian cancer G-protein coupled receptor 1	numeric
seq.12504.26	Leiomodin-1	numeric
seq.12507.16	Inositol-trisphosphate 3-kinase C	numeric
seq.12508.9	Charged multivesicular body protein 3	numeric
seq.12509.115	COMM domain-containing protein 1	numeric
seq.12510.3	Signal-transducing adaptor protein 1	numeric
seq.12511.83	Solute carrier family 41 member 2	numeric
seq.12513.8	Glycolipid transfer protein	numeric
seq.12514.16	tRNA (guanine-N(7)-)-methyltransferase	numeric
seq.12515.45	Uridine-cytidine kinase 2	numeric
seq.12516.13	Transcriptional enhancer factor TEF-3	numeric
seq.12517.52	Programmed cell death protein 5	numeric
seq.12518.289	Protein polybromo-1	numeric
seq.12521.3	Cyclin-dependent kinase 4 inhibitor C	numeric
seq.12522.6	UV excision repair protein RAD23 homolog B	numeric
seq.12524.18	Diamine acetyltransferase 2	numeric
seq.12527.50	Thyroid hormone receptor alpha	numeric
seq.12528.40	ATPase WRNIP1	numeric
seq.12529.32	Inactive peptidyl-prolyl cis-trans isomerase FKBP6	numeric
seq.12530.14	Cyclin-dependent kinases regulatory subunit 1	numeric
seq.12531.5	Endogenous retrovirus group V member 1 Env polyprotein	numeric
seq.12532.28	Ubiquitin-conjugating enzyme E2 R1	numeric
seq.12533.135	Cytohesin-2	numeric
seq.12534.10	Calcium-binding and coiled-coil domain-containing protein 2	numeric
seq.12535.2	DNA repair protein XRCC1	numeric
seq.12536.46	Myotubularin-related protein 6	numeric
seq.12537.88	Transcriptional activator protein Pur-alpha	numeric
seq.12538.19	Regulator of G-protein signaling 7	numeric
seq.12540.25	Rho-related GTP-binding protein RhoG	numeric
seq.12543.76	Zinc finger protein 560	numeric
seq.12546.1	Smoothelin	numeric
seq.12548.75	Ras-related GTP-binding protein C	numeric
seq.12549.33	Hematopoietic prostaglandin D synthase	numeric
seq.12551.3	E3 ubiquitin-protein ligase Itchy homolog	numeric
seq.12553.5	Serine/threonine-protein kinase VRK1	numeric
seq.12554.10	DNA repair protein RAD51 homolog 4	numeric
seq.12556.7	Ubiquitin-conjugating enzyme E2 C	numeric
seq.12557.18	RNA-binding protein Nova-1	numeric
seq.12558.3	Ubiquitin-associated and SH3 domain-containing protein B	numeric
seq.12560.9	5'(3')-deoxyribonucleotidase, cytosolic type	numeric
seq.12562.1	Serine/threonine-protein kinase N1	numeric
seq.12563.2	Tumor necrosis factor alpha-induced protein 8	numeric
seq.12564.9	60S ribosome subunit biogenesis protein NIP7 homolog	numeric
seq.12568.14	Kelch-like ECH-associated protein 1	numeric
seq.12569.25	T-complex protein 1 subunit epsilon	numeric
seq.12571.14	ADP-ribosylation factor-like protein 3	numeric
seq.12572.236	Embryonal Fyn-associated substrate	numeric
seq.12573.80	Tripartite motif-containing protein 3	numeric
seq.12574.36	Endothelin-2	numeric
seq.12575.30	C-1-tetrahydrofolate synthase, cytoplasmic	numeric
seq.12576.21	Melanoma-associated antigen 3	numeric
seq.12577.100	Flap endonuclease 1	numeric
seq.12578.13	ADP-ribosylation factor 3	numeric
seq.12580.7	Proteasome subunit beta type-5	numeric
seq.12581.39	Inositol monophosphatase 2	numeric
seq.12583.77	Serine/threonine-protein kinase A-Raf	numeric
seq.12585.39	DNA excision repair protein ERCC-1	numeric
seq.12587.65	ADP-ribosylation factor-like protein 2	numeric
seq.12591.27	Oligophrenin-1	numeric
seq.12593.33	p53 and DNA damage-regulated protein 1	numeric
seq.12594.5	Grancalcin	numeric
seq.12595.11	Tropomodulin-1	numeric
seq.12597.68	Autophagy protein 5	numeric
seq.12599.10	Fermitin family homolog 3	numeric
seq.12603.87	Polyadenylate-binding protein 4	numeric
seq.12604.16	Polycomb protein SCMH1	numeric
seq.12605.1	Exosome complex component RRP40	numeric
seq.12612.37	Proteasome subunit beta type-1	numeric
seq.12616.45	Nuclear receptor-binding protein	numeric
seq.12617.2	Serine/threonine-protein kinase 24	numeric
seq.12618.50	Aldo-keto reductase family 1 member C1	numeric
seq.12619.14	Protein phosphatase 1A	numeric
seq.12620.3	Septin-11	numeric
seq.12621.55	Serine/threonine-protein phosphatase 2A 65 kDa regulatory subunit A alpha isoform	numeric
seq.12622.96	Histone-lysine N-methyltransferase ASH1L	numeric
seq.12623.84	Protein Jumonji	numeric
seq.12625.138	Kelch-like protein 7	numeric
seq.12626.6	Sentrin-specific protease 7	numeric
seq.12627.97	Ubiquitin-like modifier-activating enzyme ATG7	numeric
seq.12628.31	LanC-like protein 2	numeric
seq.12630.8	Arfaptin-2	numeric
seq.12632.14	Arylamine N-acetyltransferase 1	numeric
seq.12633.3	Tyrosine-protein phosphatase non-receptor type 9	numeric
seq.12634.79	Breast cancer anti-estrogen resistance protein 3:Guanine Nucleotide Exchange Factor Domain	numeric
seq.12635.9	tRNA (cytosine(38)-C(5))-methyltransferase	numeric
seq.12636.113	N-lysine methyltransferase SMYD2	numeric
seq.12637.7	Carnitine O-acetyltransferase	numeric
seq.12641.3	Type II inositol 1,4,5-trisphosphate 5-phosphatase	numeric
seq.12643.4	Beta-arrestin-1	numeric
seq.12644.63	Adenylosuccinate synthetase isozyme 2	numeric
seq.12646.2	Ribulose-phosphate 3-epimerase	numeric
seq.12647.52	Histone-lysine N-methyltransferase SETD2	numeric
seq.12649.80	Malate dehydrogenase, mitochondrial	numeric
seq.12650.43	Guanine nucleotide-binding protein G(k) subunit alpha	numeric
seq.12651.21	[Pyruvate dehydrogenase (acetyl-transferring)] kinase isozyme 2, mitochondrial	numeric
seq.12652.37	Adenosylhomocysteinase 2	numeric
seq.12653.13	Casein kinase I isoform gamma-2	numeric
seq.12655.30	Beta-soluble NSF attachment protein	numeric
seq.12656.1	Kinesin light chain 1	numeric
seq.12657.2	GDP-L-fucose synthase	numeric
seq.12658.72	Pantothenate kinase 3	numeric
seq.12659.13	Obg-like ATPase 1	numeric
seq.12661.44	Gamma-aminobutyric acid receptor-associated protein-like 1	numeric
seq.12662.82	Delta(3,5)-Delta(2,4)-dienoyl-CoA isomerase, mitochondrial	numeric
seq.12663.1	Thiosulfate sulfurtransferase	numeric
seq.12664.19	Tyrosine-protein phosphatase non-receptor type 13	numeric
seq.12665.16	Interleukin enhancer-binding factor 2	numeric
seq.12667.2	Guanine deaminase	numeric
seq.12668.7	Vacuolar protein sorting-associated protein 4B	numeric
seq.12669.30	E3 ubiquitin-protein ligase HECW1	numeric
seq.12670.15	Cell cycle checkpoint protein RAD1	numeric
seq.12671.35	Sulfotransferase family cytosolic 1B member 1	numeric
seq.12675.14	Aspartate--tRNA ligase, cytoplasmic	numeric
seq.12676.1	Protein kinase C and casein kinase substrate in neurons protein 1	numeric
seq.12677.164	Protein flightless-1 homolog	numeric
seq.12678.66	U1 small nuclear ribonucleoprotein A	numeric
seq.12681.63	Ubiquitin carboxyl-terminal hydrolase 21	numeric
seq.12682.5	Kynurenine--oxoglutarate transaminase 3	numeric
seq.12683.156	Dihydropyrimidinase-related protein 5	numeric
seq.12684.5	Adseverin	numeric
seq.12685.57	Homer protein homolog 2	numeric
seq.12686.15	3-mercaptopyruvate sulfurtransferase	numeric
seq.12687.2	2,4-dienoyl-CoA reductase, mitochondrial	numeric
seq.12688.115	Ribosomal protein S6 kinase alpha-6	numeric
seq.12689.56	Actin-related protein 2/3 complex subunit 1B	numeric
seq.12690.33	Septin-10	numeric
seq.12691.44	Serine hydroxymethyltransferase, mitochondrial	numeric
seq.12692.56	Histone-lysine N-methyltransferase, H3 lysine-79 specific	numeric
seq.12693.2	SH3 domain-binding glutamic acid-rich-like protein	numeric
seq.12694.28	Probable dimethyladenosine transferase	numeric
seq.12695.62	Kelch-like protein 12	numeric
seq.12696.166	Protein arginine N-methyltransferase 3	numeric
seq.12697.30	Phosphatidylinositol 5-phosphate 4-kinase type-2 alpha	numeric
seq.12698.72	Importin subunit alpha-3	numeric
seq.12699.28	T-complex protein 1 subunit theta	numeric
seq.12700.9	ATP-citrate synthase	numeric
seq.12701.1	Eukaryotic translation initiation factor 1b	numeric
seq.12702.13	E3 ubiquitin-protein ligase pellino homolog 2	numeric
seq.12703.6	Serine/threonine-protein kinase Nek7	numeric
seq.12704.26	SH2 domain-containing protein 3C	numeric
seq.12705.9	Probable E3 ubiquitin-protein ligase HERC1	numeric
seq.12706.2	Serine/threonine-protein kinase MRCK alpha	numeric
seq.12707.26	Dihydropyrimidinase-related protein 3	numeric
seq.12708.91	Lethal(3)malignant brain tumor-like protein 2	numeric
seq.12709.63	Histone H1x	numeric
seq.12711.19	Gap junction alpha-8 protein	numeric
seq.12712.9	High mobility group protein 20A	numeric
seq.12713.365	Regulator of G-protein signaling 19	numeric
seq.12714.38	AP-1 complex subunit gamma-like 2	numeric
seq.12715.30	mRNA-decapping enzyme 1B	numeric
seq.12716.3	Zinc finger protein 175	numeric
seq.12717.65	TOX high mobility group box family member 3	numeric
seq.12718.43	Peptidyl-prolyl cis-trans isomerase NIMA-interacting 4	numeric
seq.12720.71	Ubiquilin-4	numeric
seq.12721.4	Tax1-binding protein 1	numeric
seq.12724.81	Cold-inducible RNA-binding protein	numeric
seq.12726.3	Regulatory factor X-associated protein	numeric
seq.12727.7	Prostaglandin F2 receptor negative regulator	numeric
seq.12729.12	Proteasome assembly chaperone 3	numeric
seq.12730.3	Kinetochore protein NDC80 homolog	numeric
seq.12731.12	Pleckstrin homology domain-containing family A member 7	numeric
seq.12732.13	MAGUK p55 subfamily member 7	numeric
seq.12734.112	Kinesin-like protein KIF22	numeric
seq.12735.39	Cold shock domain-containing protein E1	numeric
seq.12737.12	Plastin-1	numeric
seq.12738.43	Nischarin	numeric
seq.12740.55	Protein FEV	numeric
seq.12742.160	Transmembrane protein 8B	numeric
seq.12743.18	BAG family molecular chaperone regulator 5	numeric
seq.12746.4	Cytohesin-4	numeric
seq.12747.89	RNA-binding protein 3	numeric
seq.12748.6	Bromodomain testis-specific protein	numeric
seq.12750.9	Integrin beta-2	numeric
seq.12751.26	Zinc fingers and homeoboxes protein 1	numeric
seq.12753.6	Amyloid beta A4 precursor protein-binding family B member 2:Phosphotyrosine Interaction Domain 1	numeric
seq.12754.14	Cold shock domain-containing protein C2	numeric
seq.12756.3	Transcription regulator protein BACH2	numeric
seq.12758.47	Glutamate receptor ionotropic, delta-2	numeric
seq.12759.47	Interleukin enhancer-binding factor 3	numeric
seq.12760.34	Zinc finger protein 774	numeric
seq.12761.12	Amyloid beta A4 precursor protein-binding family B member 2:Phosphotyrosine Interaction Domain 2	numeric
seq.12763.69	Zinc finger protein 334	numeric
seq.12764.3	Engulfment and cell motility protein 1	numeric
seq.12766.33	Probable G-protein coupled receptor 142	numeric
seq.12768.3	Protein phosphatase 1 regulatory subunit 3B	numeric
seq.12771.19	Zinc finger protein 180	numeric
seq.12772.8	Nuclear pore complex protein Nup98-Nup96	numeric
seq.12774.12	Potassium/sodium hyperpolarization-activated cyclic nucleotide-gated channel 1	numeric
seq.12775.6	High mobility group protein B3	numeric
seq.12777.11	Splicing factor 1	numeric
seq.12779.30	PR domain zinc finger protein 4	numeric
seq.12781.2	RISC-loading complex subunit TARBP2	numeric
seq.12783.29	Heterogeneous nuclear ribonucleoprotein M	numeric
seq.12784.10	Amyloid beta A4 precursor protein-binding family B member 3:Phosphotyrosine Interaction Domain 1,Isoform II	numeric
seq.12785.49	Transcriptional regulator Kaiso	numeric
seq.12786.61	Glycerophosphocholine phosphodiesterase GPCPD1	numeric
seq.12787.47	Zinc finger protein 134	numeric
seq.12788.6	SAGA-associated factor 29 homolog	numeric
seq.12790.10	Coiled-coil domain-containing protein 51	numeric
seq.12793.4	Piwi-like protein 1	numeric
seq.12794.6	NACHT, LRR and PYD domains-containing protein 4	numeric
seq.12795.2	Zinc finger protein 566	numeric
seq.12796.44	Diphosphoinositol polyphosphate phosphohydrolase 1	numeric
seq.12798.46	Electroneutral sodium bicarbonate exchanger 1	numeric
seq.12799.65	DnaJ homolog subfamily C member 27	numeric
seq.12800.5	Tubulin polymerization-promoting protein family member 2	numeric
seq.12801.33	Interferon regulatory factor 2	numeric
seq.12803.9	Zinc finger protein 329	numeric
seq.12804.5	Glucocorticoid modulatory element-binding protein 2	numeric
seq.12807.89	Rho GTPase-activating protein 30	numeric
seq.12808.103	Calcium-regulated heat-stable protein 1	numeric
seq.12811.55	Zinc finger protein 415	numeric
seq.12812.25	Acylphosphatase-2	numeric
seq.12813.18	EH domain-binding protein 1	numeric
seq.12814.17	RNA-binding protein 40	numeric
seq.12815.9	Isoleucine--tRNA ligase, cytoplasmic	numeric
seq.12817.1	GTP-binding protein GEM	numeric
seq.12818.159	Urea transporter 2	numeric
seq.12820.1	GRB2-related adapter protein	numeric
seq.12821.6	NACHT, LRR and PYD domains-containing protein 10	numeric
seq.12822.34	Amyloid beta A4 precursor protein-binding family B member 1:Phosphotyrosine Interaction Domain 1	numeric
seq.12825.18	DCC-interacting protein 13-alpha	numeric
seq.12826.5	Sodium/iodide cotransporter	numeric
seq.12827.37	Regulator of G-protein signaling 3	numeric
seq.12830.4	Histone deacetylase complex subunit SAP18	numeric
seq.12831.21	Calcineurin B homologous protein 3	numeric
seq.12832.10	Set1/Ash2 histone methyltransferase complex subunit ASH2	numeric
seq.12834.3	Potassium voltage-gated channel subfamily F member 1	numeric
seq.12835.101	Pyrin domain-containing protein 1	numeric
seq.12838.28	Dual specificity protein phosphatase 15	numeric
seq.12842.43	Syntaxin-10	numeric
seq.12843.6	Zinc finger protein 410	numeric
seq.12844.10	BAG family molecular chaperone regulator 4	numeric
seq.12845.18	Sorting nexin-17	numeric
seq.12846.3	F-box/LRR-repeat protein 5	numeric
seq.12847.27	mRNA-capping enzyme	numeric
seq.12848.9	Rho guanine nucleotide exchange factor 2	numeric
seq.12849.25	GSK3-beta interaction protein	numeric
seq.12851.5	DNA-directed DNA/RNA polymerase mu	numeric
seq.12853.112	Tropomodulin-2	numeric
seq.12854.3	Transcriptional enhancer factor TEF-5	numeric
seq.12855.16	Cas scaffolding protein family member 4	numeric
seq.12856.14	Transmembrane protein 237	numeric
seq.12859.33	Enoyl-CoA delta isomerase 2, mitochondrial	numeric
seq.12860.7	cAMP-regulated phosphoprotein 21	numeric
seq.12861.13	Tropomodulin-3	numeric
seq.12862.14	Enhancer of filamentation 1	numeric
seq.12864.9	Magnesium transporter NIPA4	numeric
seq.12867.40	Dynein light chain Tctex-type 3	numeric
seq.12869.68	Probable ATP-dependent RNA helicase DDX6	numeric
seq.12871.10	Twinfilin-1	numeric
seq.12872.35	Cyclic nucleotide-gated olfactory channel	numeric
seq.12873.11	Leukosialin	numeric
seq.12875.28	Ubiquitin domain-containing protein 2	numeric
seq.12876.39	Sperm flagellar protein 1	numeric
seq.12878.60	Oxysterol-binding protein-related protein 11	numeric
seq.12879.5	Retinoblastoma-like protein 1	numeric
seq.12880.1	Synaptic vesicle glycoprotein 2A	numeric
seq.12881.17	Retinol dehydrogenase 16	numeric
seq.12882.7	Poly [ADP-ribose] polymerase 11	numeric
seq.12885.42	Nuclear receptor subfamily 1 group D member 2	numeric
seq.12888.18	Histone deacetylase complex subunit SAP30	numeric
seq.12891.1	MICAL-like protein 2	numeric
seq.12892.10	Synaptotagmin-like protein 1	numeric
seq.12893.159	Gamma-interferon-inducible protein 16:Isoform 2, Hematopoietic expression, interferon-inducible nature, and nuclear localization 2	numeric
seq.12894.3	PAX-interacting protein 1	numeric
seq.12895.28	Diacylglycerol kinase beta	numeric
seq.12904.180	cubilin	numeric
seq.12916.3	Protein p13 MTCP-1	numeric
seq.12923.51	Keratin, type I cytoskeletal 17	numeric
seq.12925.105	Axin-2	numeric
seq.12931.16	Mineralocorticoid receptor	numeric
seq.12933.17	Ecto-NOX disulfide-thiol exchanger 1	numeric
seq.12934.1	E3 ISG15--protein ligase HERC5	numeric
seq.12936.38	Retinaldehyde-binding protein 1	numeric
seq.12939.1	DNA-directed RNA polymerases I and III subunit RPAC1	numeric
seq.12940.35	Aldehyde dehydrogenase family 3 member B1	numeric
seq.12945.33	Ras-related protein Rab-18	numeric
seq.12954.71	Peroxisome proliferator-activated receptor alpha	numeric
seq.12956.40	KIF1-binding protein	numeric
seq.12957.62	Cytochrome b-c1 complex subunit 7	numeric
seq.12960.9	Glucokinase	numeric
seq.12963.1	Protein GPR107	numeric
seq.12968.2	Cysteine and glycine-rich protein 2	numeric
seq.12970.35	Double-stranded RNA-binding protein Staufen homolog 2	numeric
seq.12975.11	Keratin, type I cytoskeletal 20	numeric
seq.12976.49	Vinexin b	numeric
seq.12980.31	Pre-mRNA-splicing factor RBM22	numeric
seq.12986.12	Protein lin-7 homolog C	numeric
seq.12987.12	Serine/arginine-rich splicing factor 7	numeric
seq.12988.49	RNA-binding protein EWS	numeric
seq.12990.39	Mitogen-activated protein kinase kinase kinase 3	numeric
seq.12991.49	Cullin-9	numeric
seq.12993.21	Nuclear protein localization protein 4 homolog	numeric
seq.13007.66	Epididymal-specific lipocalin-10	numeric
seq.13011.20	40S ribosomal protein S10	numeric
seq.13013.41	E3 ubiquitin-protein ligase parkin	numeric
seq.13022.20	Tumor protein p53-inducible protein 11	numeric
seq.13025.4	Fibroblast growth factor receptor substrate 2	numeric
seq.13027.20	Chromobox protein homolog 7	numeric
seq.13032.1	Beclin-1	numeric
seq.13039.1	Nuclear inhibitor of protein phosphatase 1	numeric
seq.13041.47	TNF receptor-associated factor 4	numeric
seq.13042.7	Potassium voltage-gated channel subfamily A member 10	numeric
seq.13043.157	ATPase family AAA domain-containing protein 2	numeric
seq.13044.5	Tumor susceptibility gene 101 protein	numeric
seq.13053.6	Sodium- and chloride-dependent neutral and basic amino acid transporter B(0+)	numeric
seq.13054.87	Profilin-2	numeric
seq.13055.53	PH and SEC7 domain-containing protein 1	numeric
seq.13056.18	Orphan sodium- and chloride-dependent neurotransmitter transporter NTT5	numeric
seq.13059.33	Riboflavin kinase	numeric
seq.13062.4	Glia maturation factor gamma	numeric
seq.13066.42	Enhancer of mRNA-decapping protein 4	numeric
seq.13067.5	cGMP-dependent protein kinase 1, beta isozyme	numeric
seq.13068.139	Copper chaperone for superoxide dismutase	numeric
seq.13073.14	Acidic leucine-rich nuclear phosphoprotein 32 family member A	numeric
seq.13076.4	Fragile X mental retardation syndrome-related protein 1	numeric
seq.13078.3	Centrin-2	numeric
seq.13082.9	Protein unc-45 homolog A	numeric
seq.13083.18	Valine--tRNA ligase	numeric
seq.13085.18	Glucagon-like peptide 1 receptor:Cytoplasmic domain	numeric
seq.13088.397	Betacellulin	numeric
seq.13089.6	Hypoxia-inducible factor 1-alpha	numeric
seq.13090.17	Protein S100-A6	numeric
seq.13093.6	Secreted and transmembrane protein 1	numeric
seq.13094.75	R-spondin-3	numeric
seq.13095.51	Lithostathine-1-alpha	numeric
seq.13097.11	Bcl-2-like protein 2	numeric
seq.13098.93	Vascular endothelial growth factor D	numeric
seq.13101.60	Sclerostin	numeric
seq.13102.1	Protein FAM3D	numeric
seq.13103.125	Chorionic somatomammotropin hormone	numeric
seq.13104.32	Ephrin-B1	numeric
seq.13105.7	Synaptosomal-associated protein 25	numeric
seq.13107.9	Ly6/PLAUR domain-containing protein 3	numeric
seq.13109.82	Neuronal growth regulator 1	numeric
seq.13111.79	B-cell lymphoma 6 protein	numeric
seq.13112.179	Follistatin-related protein 1	numeric
seq.13113.7	Osteopontin	numeric
seq.13114.50	Lumican	numeric
seq.13116.25	CD177 antigen	numeric
seq.13117.232	Choline/ethanolamine kinase	numeric
seq.13118.5	SPARC-related modular calcium-binding protein 1	numeric
seq.13119.26	Protein Z-dependent protease inhibitor	numeric
seq.13122.19	Leucine-rich repeat transmembrane protein FLRT2	numeric
seq.13123.3	Leucine-rich repeat transmembrane protein FLRT3:Extracellular domain	numeric
seq.13124.20	Immunoglobulin superfamily containing leucine-rich repeat protein 2	numeric
seq.13125.45	Vitronectin	numeric
seq.13126.52	Desmocollin-2	numeric
seq.13129.40	Low-density lipoprotein receptor	numeric
seq.13130.150	Hexokinase-2	numeric
seq.13131.5	Hexokinase-1	numeric
seq.13132.14	Semaphorin-5A	numeric
seq.13133.73	Latent-transforming growth factor beta-binding protein 4	numeric
seq.13228.75	E3 ubiquitin-protein ligase Mdm2	numeric
seq.13229.20	Protein Mdm4	numeric
seq.13230.174	Ig gamma-2, Kappa	numeric
seq.13231.90	Ig gamma-4, Kappa	numeric
seq.13236.25	Protein Wnt-3a	numeric
seq.13240.170	SH3 and multiple ankyrin repeat domains protein 1	numeric
seq.13242.134	SH3 and multiple ankyrin repeat domains protein 3	numeric
seq.13256.21	SH3 and multiple ankyrin repeat domains protein 1	numeric
seq.13268.45	Protein Wnt-5a	numeric
seq.13374.4	Beta-defensin 113	numeric
seq.13375.48	Synaptogyrin-3	numeric
seq.13377.3	Cytochrome b561 domain-containing protein 1	numeric
seq.13378.80	Glutaredoxin-like protein C5orf63	numeric
seq.13381.49	Beta-1,4-galactosyltransferase 1	numeric
seq.13384.110	Fumarate hydratase, mitochondrial	numeric
seq.13386.248	E3 ubiquitin-protein ligase RNF34	numeric
seq.13387.55	ETS homologous factor	numeric
seq.13388.57	Neuroendocrine convertase 1	numeric
seq.13392.13	Sodium/potassium-transporting ATPase subunit beta-1	numeric
seq.13393.46	Derlin-1	numeric
seq.13397.88	Beta-defensin 4A	numeric
seq.13399.33	RELT-like protein 1	numeric
seq.13403.5	ETS translocation variant 5	numeric
seq.13405.61	Serine protease inhibitor Kazal-type 2	numeric
seq.13406.161	CMRF35-like molecule 6	numeric
seq.13408.23	WAP, Kazal, immunoglobulin, Kunitz and NTR domain-containing protein 2	numeric
seq.13411.21	E3 ubiquitin-protein ligase NRDP1	numeric
seq.13412.5	WAP four-disulfide core domain protein 6	numeric
seq.13416.8	Transmembrane protein 132D	numeric
seq.13421.17	Protein kish-B	numeric
seq.13422.66	Ecto-NOX disulfide-thiol exchanger 2	numeric
seq.13423.94	Redox-regulatory protein FAM213A	numeric
seq.13427.66	Mannosyl-oligosaccharide 1,2-alpha-mannosidase IC	numeric
seq.13429.3	WAP four-disulfide core domain protein 10A	numeric
seq.13430.50	Urea transporter 1	numeric
seq.13431.74	Membrane protein FAM159A	numeric
seq.13432.9	Protrudin:Cytoplasmic domain, region 1, isoform 6	numeric
seq.13434.172	Alpha-parvin	numeric
seq.13435.31	Interleukin-20 receptor subunit beta	numeric
seq.13436.54	Myc-associated zinc finger protein	numeric
seq.13438.115	Chordin	numeric
seq.13439.6	IQ domain-containing protein F3	numeric
seq.13441.30	Dixin	numeric
seq.13447.42	Shadow of prion protein	numeric
seq.13449.25	Splicing factor 3B subunit 4	numeric
seq.13450.49	Ubiquitin carboxyl-terminal hydrolase 8	numeric
seq.13451.2	Fibronectin type III domain-containing protein 4	numeric
seq.13452.113	Small integral membrane protein 13	numeric
seq.13453.2	39S ribosomal protein L33, mitochondrial	numeric
seq.13457.33	ETS-related transcription factor Elf-5	numeric
seq.13459.30	Torsin-4A	numeric
seq.13460.4	Chondroadherin	numeric
seq.13463.1	Peroxidasin homolog	numeric
seq.13464.8	Nutritionally-regulated adipose and cardiac enriched protein homolog	numeric
seq.13465.5	Calcipressin-1	numeric
seq.13468.5	Neuralized-like protein 4	numeric
seq.13470.43	Parathyroid hormone/parathyroid hormone-related peptide receptor	numeric
seq.13472.35	Haloacid dehalogenase-like hydrolase domain-containing protein 2	numeric
seq.13473.55	Inositol-trisphosphate 3-kinase A	numeric
seq.13474.40	Glutathione S-transferase kappa 1	numeric
seq.13475.10	Ubiquitin-conjugating enzyme E2 D4	numeric
seq.13476.16	DNA/RNA-binding protein KIN17	numeric
seq.13477.65	Leukotriene B4 receptor 1	numeric
seq.13479.8	Protein FAM171A2	numeric
seq.13481.24	Transcription elongation factor A protein 2	numeric
seq.13482.14	CCR4-NOT transcription complex subunit 1	numeric
seq.13484.69	Collagen alpha-1(I) chain:N-term propeptide	numeric
seq.13485.20	Transmembrane protein 87B	numeric
seq.13486.9	Polycystin-2:Cytoplasmic domain 1	numeric
seq.13487.24	Protein unc-93 homolog B1	numeric
seq.13488.3	Arfaptin-1	numeric
seq.13490.1	MAGUK p55 subfamily member 6	numeric
seq.13491.40	Retinal rod rhodopsin-sensitive cGMP 3',5'-cyclic phosphodiesterase subunit delta	numeric
seq.13492.44	Stress-70 protein, mitochondrial	numeric
seq.13493.5	Glutamate receptor ionotropic, delta-1	numeric
seq.13494.6	Ceramide synthase 5	numeric
seq.13495.48	Hydroxycarboxylic acid receptor 2	numeric
seq.13496.19	Hydroxymethylglutaryl-CoA synthase, cytoplasmic	numeric
seq.13497.34	Eukaryotic translation initiation factor 3 subunit J	numeric
seq.13498.1	Inositol oxygenase	numeric
seq.13499.30	Coagulation Factor VIII	numeric
seq.13501.10	Solute carrier family 35 member G2	numeric
seq.13502.2	Sodium-independent sulfate anion transporter	numeric
seq.13503.19	PRA1 family protein 3	numeric
seq.13504.147	Heterogeneous nuclear ribonucleoprotein R	numeric
seq.13506.10	tRNA-dihydrouridine(20) synthase [NAD(P)+]-like	numeric
seq.13507.51	Tumor necrosis factor receptor type 1-associated DEATH domain protein	numeric
seq.13509.5	Secretory carrier-associated membrane protein 5	numeric
seq.13510.7	Sarcoplasmic/endoplasmic reticulum calcium ATPase 3	numeric
seq.13511.29	DNA-binding protein SATB1	numeric
seq.13512.28	Heterogeneous nuclear ribonucleoprotein R	numeric
seq.13513.174	E3 SUMO-protein ligase PIAS3	numeric
seq.13514.121	Ras-related protein Rab-35	numeric
seq.13515.8	Regulation of nuclear pre-mRNA domain-containing protein 1A	numeric
seq.13516.46	ER membrane protein complex subunit 4	numeric
seq.13517.3	Patched domain-containing protein 3	numeric
seq.13518.5	Arf-GAP with SH3 domain, ANK repeat and PH domain-containing protein 2	numeric
seq.13519.112	Rho guanine nucleotide exchange factor 25	numeric
seq.13522.20	Visinin-like protein 1	numeric
seq.13524.25	Heparan-sulfate 6-O-sulfotransferase 2	numeric
seq.13525.17	Potassium voltage-gated channel subfamily G member 4	numeric
seq.13526.5	Lupus La protein:RNA recognition motif	numeric
seq.13529.39	Nucleosome assembly protein 1-like 2	numeric
seq.13530.5	Urotensin-2 receptor	numeric
seq.13532.25	Nuclear envelope phosphatase-regulatory subunit 1	numeric
seq.13534.20	Myomesin-2	numeric
seq.13535.2	Collagen type IV alpha-3-binding protein:PH domain	numeric
seq.13536.56	DNA polymerase iota	numeric
seq.13539.131	Small conductance calcium-activated potassium channel protein 1	numeric
seq.13540.1	G-protein coupled receptor 26	numeric
seq.13541.1	Myc target protein 1	numeric
seq.13543.7	Prostaglandin reductase 1	numeric
seq.13544.9	Rho GTPase-activating protein 45	numeric
seq.13545.97	Probable RNA-binding protein EIF1AD	numeric
seq.13547.5	5-hydroxytryptamine receptor 7	numeric
seq.13548.53	Phosphatidate phosphatase PPAPDC1A	numeric
seq.13549.15	Disintegrin and metalloproteinase domain-containing protein 29	numeric
seq.13552.7	Switch-associated protein 70	numeric
seq.13553.4	DCN1-like protein 3	numeric
seq.13554.78	Replication initiator 1	numeric
seq.13556.28	5-hydroxytryptamine receptor 2A	numeric
seq.13557.3	Nectin-3	numeric
seq.13561.5	5-hydroxytryptamine receptor 6	numeric
seq.13563.259	Acyl-CoA-binding domain-containing protein 7	numeric
seq.13565.2	Retinoblastoma-like protein 2	numeric
seq.13566.2	RNA polymerase II subunit A C-terminal domain phosphatase SSU72	numeric
seq.13567.1	Dihydropyrimidinase-related protein 2	numeric
seq.13568.30	26S proteasome non-ATPase regulatory subunit 4	numeric
seq.13570.43	Vigilin	numeric
seq.13572.43	26S proteasome non-ATPase regulatory subunit 11	numeric
seq.13573.5	Actin-related protein 2/3 complex subunit 3	numeric
seq.13574.50	Rho-related GTP-binding protein Rho6	numeric
seq.13575.40	Segment polarity protein dishevelled homolog DVL-2	numeric
seq.13576.15	Glutathione S-transferase P	numeric
seq.13577.25	Splicing factor U2AF 65 kDa subunit	numeric
seq.13578.98	Actin-binding LIM protein 3	numeric
seq.13580.2	UDP-N-acetylhexosamine pyrophosphorylase	numeric
seq.13583.19	Apoptotic protease-activating factor 1	numeric
seq.13587.10	Rac GTPase-activating protein 1	numeric
seq.13588.11	Annexin A9	numeric
seq.13589.10	Amyloid beta A4 precursor protein-binding family B member 3:Phosphotyrosine Interaction Domain 2, Isoform IV	numeric
seq.13590.1	Oligoribonuclease, mitochondrial	numeric
seq.13591.31	DNA primase small subunit	numeric
seq.13594.158	ADP-ribosylation factor-binding protein GGA1	numeric
seq.13595.20	Thiamine-triphosphatase	numeric
seq.13596.3	Ras-related protein Rab-27B	numeric
seq.13597.20	Ras-related protein Rab-31	numeric
seq.13599.15	Rab9 effector protein with kelch motifs	numeric
seq.13602.6	NHP2-like protein 1	numeric
seq.13603.7	Rieske domain-containing protein	numeric
seq.13604.27	E3 ubiquitin-protein ligase NEURL1	numeric
seq.13605.16	Annexin A10	numeric
seq.13609.11	General transcription factor II-I	numeric
seq.13610.9	Melanoma-associated antigen 10	numeric
seq.13612.7	Cytohesin-interacting protein	numeric
seq.13613.23	Adenylate kinase isoenzyme 5	numeric
seq.13614.6	CREB-binding protein	numeric
seq.13615.60	Cytoplasmic protein NCK2	numeric
seq.13618.15	Mitotic spindle assembly checkpoint protein MAD1	numeric
seq.13620.10	ATPase ASNA1	numeric
seq.13621.31	AP-2 complex subunit alpha-2	numeric
seq.13622.16	Serine/threonine-protein phosphatase 2A 56 kDa regulatory subunit alpha isoform	numeric
seq.13623.4	Histone-lysine N-methyltransferase 2D	numeric
seq.13624.17	NAD kinase	numeric
seq.13625.19	Lupus La protein:HTH La-type RNA-binding domain	numeric
seq.13628.58	Growth factor receptor-bound protein 14	numeric
seq.13629.25	Cysteine protease ATG4B	numeric
seq.13631.1	Retinoblastoma-binding protein 5	numeric
seq.13632.10	Zyxin	numeric
seq.13634.209	Pirin	numeric
seq.13636.20	Nucleosome assembly protein 1-like 1	numeric
seq.13639.101	General vesicular transport factor p115	numeric
seq.13640.5	B-cell lymphoma 6 protein	numeric
seq.13642.90	Interferon-induced protein with tetratricopeptide repeats 3	numeric
seq.13644.30	Hepatocyte growth factor-regulated tyrosine kinase substrate	numeric
seq.13645.14	Pre-mRNA-splicing factor ATP-dependent RNA helicase PRP16	numeric
seq.13650.11	Kv channel-interacting protein 1	numeric
seq.13651.54	E3 ubiquitin-protein ligase ZFP91	numeric
seq.13652.2	TOM1-like protein 1	numeric
seq.13653.335	O-acetyl-ADP-ribose deacetylase MACROD1	numeric
seq.13654.1	Rho-associated protein kinase 2	numeric
seq.13655.34	Nucleolin	numeric
seq.13657.2	Bifunctional polynucleotide phosphatase/kinase	numeric
seq.13658.31	Platelet-derived growth factor C	numeric
seq.13659.36	Manganese-transporting ATPase 13A1	numeric
seq.13660.76	Angiopoietin-2	numeric
seq.13661.193	Cystatin-D	numeric
seq.13663.2	Interleukin-4	numeric
seq.13665.35	Serine/threonine-protein phosphatase 2A regulatory subunit B'' subunit alpha	numeric
seq.13666.222	Carbonic anhydrase-related protein 10	numeric
seq.13668.44	Tyrosine-protein kinase receptor TYRO3	numeric
seq.13669.6	Fibroblast growth factor receptor 3:Extracellular domain	numeric
seq.13670.81	Group IIE secretory phospholipase A2	numeric
seq.13671.40	Neutrophil elastase	numeric
seq.13672.3	Heat shock 70 kDa protein 6	numeric
seq.13673.21	T-complex protein 1 subunit eta	numeric
seq.13676.46	Inhibin beta B chain	numeric
seq.13678.169	Complement factor D	numeric
seq.13680.3	NGFI-A-binding protein 2	numeric
seq.13681.173	Casein kinase II subunit alpha'	numeric
seq.13682.47	Macrophage colony-stimulating factor 1 receptor	numeric
seq.13683.18	Chloride channel protein ClC-Kb	numeric
seq.13686.2	Interleukin-5 receptor subunit alpha	numeric
seq.13687.5	C-C motif chemokine 1	numeric
seq.13688.2	Calcyphosin-like protein	numeric
seq.13689.2	Ornithine decarboxylase	numeric
seq.13690.26	Biglycan	numeric
seq.13691.10	Sodium-coupled monocarboxylate transporter 1	numeric
seq.13692.154	WNT1-inducible-signaling pathway protein 1	numeric
seq.13693.5	Cerebral dopamine neurotrophic factor	numeric
seq.13694.24	Cytokine receptor-like factor 2	numeric
seq.13697.51	Glycerol-3-phosphate dehydrogenase [NAD(+)], cytoplasmic	numeric
seq.13698.28	Dyslexia-associated protein KIAA0319-like protein	numeric
seq.13699.6	Prostate-specific antigen	numeric
seq.13700.10	Annexin A2	numeric
seq.13701.2	C-X-C motif chemokine 13	numeric
seq.13704.5	Hydroxymethylglutaryl-CoA synthase, mitochondrial	numeric
seq.13706.12	Interleukin-12 receptor subunit beta-1	numeric
seq.13707.27	SPARC-like protein 1	numeric
seq.13708.56	Kallikrein-8	numeric
seq.13710.6	Plasma protease C1 inhibitor	numeric
seq.13711.10	Clathrin heavy chain 1	numeric
seq.13712.104	Granzyme A	numeric
seq.13713.164	Vesicle-trafficking protein SEC22a	numeric
seq.13717.15	Ficolin-2	numeric
seq.13719.19	Serine/threonine-protein kinase PAK 4	numeric
seq.13720.95	Myeloblastin	numeric
seq.13722.105	Complement component C9	numeric
seq.13723.6	Interleukin-10	numeric
seq.13724.27	Fibroblast growth factor 19	numeric
seq.13725.3	Fibroblast growth factor 16	numeric
seq.13726.4	T-lymphocyte activation antigen CD80	numeric
seq.13727.44	Speckle-type POZ protein	numeric
seq.13728.19	Endoplasmic reticulum resident protein 29	numeric
seq.13729.26	Sideroflexin-5	numeric
seq.13730.18	Dipeptidyl peptidase 1	numeric
seq.13731.14	Complement component C7	numeric
seq.13732.79	Cardiotrophin-1	numeric
seq.13733.5	Interleukin-12 subunit beta	numeric
seq.13734.22	Interferon lambda-1	numeric
seq.13735.1	Rap1 GTPase-activating protein 1	numeric
seq.13738.8	Inhibin beta A chain	numeric
seq.13739.3	Leucine-rich repeat transmembrane protein FLRT1	numeric
seq.13740.51	Secreted frizzled-related protein 3	numeric
seq.13741.36	Insulin-like growth factor-binding protein 1	numeric
seq.13742.66	Interleukin-22	numeric
seq.13743.56	Cullin-4B	numeric
seq.13744.37	Interleukin-3 receptor subunit alpha	numeric
seq.13745.10	Polycystin-2:Cytoplasmic domain 4	numeric
seq.13747.9	Carbonic anhydrase 6	numeric
seq.13748.4	C-C motif chemokine 8	numeric
seq.13924.13	Myocardial zonula adherens protein	numeric
seq.13926.1	RecQ-mediated genome instability protein 1	numeric
seq.13929.27	Peroxisomal carnitine O-octanoyltransferase	numeric
seq.13930.3	DNA dC->dU-editing enzyme APOBEC-3G	numeric
seq.13931.22	26S proteasome non-ATPase regulatory subunit 9	numeric
seq.13932.45	Rho guanine nucleotide exchange factor 7	numeric
seq.13933.276	NGFI-A-binding protein 1	numeric
seq.13934.3	Guanine nucleotide exchange factor DBS	numeric
seq.13936.24	Phosphoglycerate kinase 2	numeric
seq.13937.75	Cullin-associated NEDD8-dissociated protein 1	numeric
seq.13939.14	UTP--glucose-1-phosphate uridylyltransferase	numeric
seq.13940.19	Gamma-interferon-inducible protein 16:Isoform 2, Hematopoietic expression, interferon-inducible nature, and nuclear localization 1	numeric
seq.13941.82	Phenylalanine--tRNA ligase, mitochondrial	numeric
seq.13942.140	SPRY domain-containing SOCS box protein 1	numeric
seq.13943.38	Protein dpy-30 homolog	numeric
seq.13944.3	Sulfotransferase 1A3	numeric
seq.13946.8	Probable ATP-dependent RNA helicase DDX23	numeric
seq.13947.371	Peroxisomal NADH pyrophosphatase NUDT12	numeric
seq.13948.50	Gamma-aminobutyric acid type B receptor subunit 2:Extracellular domain	numeric
seq.13950.9	Collagen type IV alpha-3-binding protein:StAR-related lipid-transfer domain, isoform 2	numeric
seq.13954.9	Glucosamine 6-phosphate N-acetyltransferase	numeric
seq.13955.33	Death-associated protein kinase 1	numeric
seq.13958.5	Probable RNA-binding protein 46	numeric
seq.13959.7	Cytosol aminopeptidase	numeric
seq.13960.15	Arf-GAP with GTPase, ANK repeat and PH domain-containing protein 3	numeric
seq.13961.18	Kinesin-like protein KIF3A	numeric
seq.13963.7	Toll-interacting protein	numeric
seq.13966.30	Myomesin-3	numeric
seq.13967.14	Thioredoxin reductase 1, cytoplasmic	numeric
seq.13969.24	Importin subunit alpha-7	numeric
seq.13972.4	17-beta-hydroxysteroid dehydrogenase 14	numeric
seq.13973.62	Tubulin--tyrosine ligase	numeric
seq.13975.56	Liprin-alpha-1	numeric
seq.13976.9	Rho guanine nucleotide exchange factor 1	numeric
seq.13977.28	BRCA1-associated RING domain protein 1	numeric
seq.13978.122	T-box transcription factor TBX3	numeric
seq.13979.3	Anion exchange transporter	numeric
seq.13982.33	Regulator of G-protein signaling 18	numeric
seq.13983.27	Quinone oxidoreductase	numeric
seq.13984.23	ATP-dependent RNA helicase DDX25	numeric
seq.13985.12	E3 ubiquitin-protein ligase SMURF2	numeric
seq.13986.6	LanC-like protein 1	numeric
seq.13988.67	NmrA-like family domain-containing protein 1	numeric
seq.13990.1	Pyruvate carboxylase, mitochondrial	numeric
seq.13991.47	Eukaryotic translation initiation factor 4 gamma 3	numeric
seq.13992.12	Vesicle-fusing ATPase	numeric
seq.13993.20	Band 4.1-like protein 1	numeric
seq.13994.1	rRNA 2'-O-methyltransferase fibrillarin	numeric
seq.13996.16	Phosphopantothenoylcysteine decarboxylase	numeric
seq.13998.26	Adenylosuccinate synthetase isozyme 1	numeric
seq.14002.18	Dedicator of cytokinesis protein 9	numeric
seq.14005.2	Chromodomain-helicase-DNA-binding protein 7	numeric
seq.14006.36	Glycine N-methyltransferase	numeric
seq.14007.22	Bifunctional 3'-phosphoadenosine 5'-phosphosulfate synthase 1	numeric
seq.14008.22	mRNA-decapping enzyme 1A	numeric
seq.14009.65	Tumor necrosis factor alpha-induced protein 3	numeric
seq.14011.17	Protein S100-A11	numeric
seq.14012.17	Probable ATP-dependent RNA helicase DHX58	numeric
seq.14013.11	TRAF family member-associated NF-kappa-B activator	numeric
seq.14019.73	Envoplakin	numeric
seq.14021.81	Mediator of RNA polymerase II transcription subunit 4	numeric
seq.14022.17	Interleukin-17B	numeric
seq.14023.84	Bone sialoprotein 2	numeric
seq.14024.196	Ectodysplasin-A, secreted form	numeric
seq.14025.18	Tumor necrosis factor receptor superfamily member 9	numeric
seq.14026.24	Interleukin-17F	numeric
seq.14028.22	Phosphatidylinositol 4-phosphate 3-kinase C2 domain-containing subunit alpha	numeric
seq.14029.42	COP9 signalosome complex subunit 2	numeric
seq.14030.21	Tumor necrosis factor ligand superfamily member 4	numeric
seq.14031.18	Fibroblast growth factor 7	numeric
seq.14032.2	Vascular endothelial growth factor A, isoform 121	numeric
seq.14034.22	Tumor-associated calcium signal transducer 2	numeric
seq.14035.13	T-lymphoma invasion and metastasis-inducing protein 1	numeric
seq.14036.116	Multiple PDZ domain protein	numeric
seq.14037.18	Ran-binding protein 3	numeric
seq.14038.130	Cystatin-F	numeric
seq.14039.33	Kallikrein-5	numeric
seq.14041.13	Granzyme B	numeric
seq.14042.11	Secreted frizzled-related protein 1	numeric
seq.14043.12	Early endosome antigen 1	numeric
seq.14045.12	Nuclear receptor coactivator 2	numeric
seq.14047.78	Brain-derived neurotrophic factor	numeric
seq.14048.7	Interleukin-1 Receptor accessory protein	numeric
seq.14049.17	Interleukin-7	numeric
seq.14050.61	Ephrin-A4	numeric
seq.14051.54	Forkhead box protein C2	numeric
seq.14052.26	Protein unc-13 homolog A	numeric
seq.14054.17	Interleukin-15 receptor subunit alpha	numeric
seq.14056.4	Glycoprotein hormones alpha chain	numeric
seq.14057.68	Tumor necrosis factor ligand superfamily member 15	numeric
seq.14060.67	Neutrophil cytosol factor 4	numeric
seq.14061.48	Tumor necrosis factor ligand superfamily member 11	numeric
seq.14063.17	Oncostatin-M	numeric
seq.14064.21	Peptidoglycan recognition protein 1	numeric
seq.14065.11	T-cell surface glycoprotein CD5:Cytoplasmic domain	numeric
seq.14066.49	Membrane-associated guanylate kinase, WW and PDZ domain-containing protein 2	numeric
seq.14067.6	Plakophilin-2	numeric
seq.14068.29	C-C motif chemokine 25	numeric
seq.14069.61	Carbonic anhydrase 4	numeric
seq.14070.56	Intersectin-1	numeric
seq.14072.9	Translationally-controlled tumor protein	numeric
seq.14073.31	Hemopexin	numeric
seq.14074.2	SHC-transforming protein 2	numeric
seq.14076.74	Cystatin-S	numeric
seq.14077.6	Ficolin-3	numeric
seq.14078.69	Lymphotactin	numeric
seq.14079.14	Interleukin-18 receptor 1	numeric
seq.14081.5	NKG2D ligand 1	numeric
seq.14082.56	Talin-2	numeric
seq.14083.25	Selenide, water dikinase 1	numeric
seq.14085.28	Interleukin-13	numeric
seq.14086.11	Acid sphingomyelinase-like phosphodiesterase 3a	numeric
seq.14088.38	Insulin-like growth factor-binding protein 6	numeric
seq.14090.23	Differentially expressed in FDCP 6 homolog	numeric
seq.14091.42	Carbonyl reductase [NADPH] 3	numeric
seq.14093.10	Fms-related tyrosine kinase 3 ligand	numeric
seq.14094.29	Heparin-binding EGF-like growth factor	numeric
seq.14095.1	NKG2-D type II integral membrane protein	numeric
seq.14097.86	Carbohydrate sulfotransferase 15	numeric
seq.14098.28	Cysteine--tRNA ligase, cytoplasmic	numeric
seq.14099.20	Proteasome subunit alpha type-4	numeric
seq.14100.63	Complement C1q subcomponent subunit C	numeric
seq.14101.2	Ciliary neurotrophic factor receptor subunit alpha	numeric
seq.14102.6	Granulysin	numeric
seq.14103.12	Tryptase gamma	numeric
seq.14104.1	TLR4 interactor with leucine rich repeats:Cytoplasmic domain	numeric
seq.14105.5	Kallistatin	numeric
seq.14106.46	Rap1 GTPase-GDP dissociation stimulator 1	numeric
seq.14107.1	5-formyltetrahydrofolate cyclo-ligase	numeric
seq.14108.15	Transforming growth factor beta-1	numeric
seq.14109.15	C-C motif chemokine 15	numeric
seq.14110.200	SPARC	numeric
seq.14111.15	Thrombospondin-2	numeric
seq.14112.40	Tumor necrosis factor receptor superfamily member 19L	numeric
seq.14114.18	PILR alpha-associated neural protein	numeric
seq.14115.34	Adrenomedullin	numeric
seq.14116.129	Protein S100-A4	numeric
seq.14120.2	E3 ubiquitin-protein ligase RNF43	numeric
seq.14121.24	Tumor necrosis factor receptor superfamily member 10D	numeric
seq.14122.132	E3 ubiquitin-protein ligase ZNRF3	numeric
seq.14123.34	V-type immunoglobulin domain-containing suppressor of T-cell activation:Extracellular domain	numeric
seq.14124.6	Ephrin-A2	numeric
seq.14125.5	Apolipoprotein M	numeric
seq.14127.240	Interferon beta	numeric
seq.14128.121	Interferon alpha-10	numeric
seq.14129.1	Interferon alpha-7	numeric
seq.14131.37	Ephrin-B2:Extracellular domain	numeric
seq.14132.21	HERV-H LTR-associating protein 2	numeric
seq.14133.93	Interleukin-1 receptor type 2	numeric
seq.14134.49	Amphoterin-induced protein 2	numeric
seq.14135.3	Relaxin receptor 1	numeric
seq.14136.234	Complement component C1q receptor	numeric
seq.14139.16	Neuregulin-4	numeric
seq.14143.8	Histone H2B type 2-E	numeric
seq.14144.3	Histone H2A type 3	numeric
seq.14146.92	Histone H3.1	numeric
seq.14148.2	Ubiquitin-like protein ISG15	numeric
seq.14149.9	Interleukin-36 beta	numeric
seq.14150.7	Interleukin-36 alpha	numeric
seq.14151.4	Ubiquitin-like protein ISG15	numeric
seq.14153.8	Ephrin-A3	numeric
seq.14156.33	14-3-3 protein beta/alpha	numeric
seq.14157.21	14-3-3 protein epsilon	numeric
seq.14158.17	Annexin A5	numeric
seq.14175.78	SCP2 sterol-binding domain-containing protein 1	numeric
seq.14178.18	Cyclin-dependent kinase inhibitor 3	numeric
seq.14186.13	E3 ubiquitin-protein ligase rififylin	numeric
seq.14192.31	Phosducin-like protein 2	numeric
seq.14197.2	PR domain zinc finger protein 1	numeric
seq.14203.3	Annexin A7	numeric
seq.14204.55	Forkhead box protein J2	numeric
seq.14205.6	Protein HEXIM2	numeric
seq.14206.28	Amyloid beta A4 precursor protein-binding family B member 1:Phosphotyrosine Interaction Domain 2	numeric
seq.14208.3	Retinoid-binding protein 7	numeric
seq.14216.35	Probable ATP-dependent RNA helicase DDX46	numeric
seq.14226.120	S-methylmethionine--homocysteine S-methyltransferase BHMT2	numeric
seq.14227.21	Myosin light chain 6B	numeric
seq.14229.5	Adenylyltransferase and sulfurtransferase MOCS3	numeric
seq.14237.1	Heat shock 70 kDa protein 1A	numeric
seq.14245.195	Sorting nexin-7	numeric
seq.14246.50	Docking protein 2	numeric
seq.14249.68	Probable E3 ubiquitin-protein ligase MID2	numeric
seq.14250.115	Bleomycin hydrolase	numeric
seq.14254.27	Tyrosine-protein phosphatase non-receptor type 4	numeric
seq.14260.112	Neuroepithelial cell-transforming gene 1 protein	numeric
seq.14268.4	Sulfiredoxin-1	numeric
seq.14271.23	Ras-related protein Rab-6B	numeric
seq.14273.19	Prolyl endopeptidase	numeric
seq.14283.12	Ras-related protein Rab-14	numeric
seq.14284.23	eIF-2-alpha kinase GCN2	numeric
seq.14286.2	Nuclear factor of activated T-cells, cytoplasmic 1	numeric
seq.14287.6	Ras-related protein Rab-5C	numeric
seq.14291.53	Arf-GAP with GTPase, ANK repeat and PH domain-containing protein 2	numeric
seq.14294.61	Methyl-CpG-binding domain protein 1	numeric
seq.14309.8	Heterogeneous nuclear ribonucleoprotein H	numeric
seq.14314.6	Peptidyl-prolyl cis-trans isomerase-like 2	numeric
seq.14318.1	Vacuolar protein sorting-associated protein 29	numeric
seq.14324.52	Structural maintenance of chromosomes protein 3	numeric
seq.14326.4	Ubiquitin-conjugating enzyme E2 E1	numeric
seq.14329.4	Death-inducer obliterator 1	numeric
seq.14331.262	Dynein light chain Tctex-type 1	numeric
seq.14332.3	Ras-related protein Ral-A	numeric
seq.14334.3	Recoverin	numeric
seq.14337.1	Trafficking protein particle complex subunit 3	numeric
seq.14341.8	Protein FAM69C	numeric
seq.14583.49	Growth/differentiation factor 8	numeric
seq.14587.16	Growth/differentiation factor 11	numeric
seq.14593.152	Protein FAM210A	numeric
seq.14597.5	Semaphorin-6C, cytoplasmic	numeric
seq.14599.18	Stabilin-1	numeric
seq.14603.51	Uncharacterized protein KIAA0040	numeric
seq.14614.41	Noncompact myelin-associated protein	numeric
seq.14615.46	Keratin-associated protein 2-4	numeric
seq.14616.16	Zinc finger protein 382	numeric
seq.14618.26	Vesicular, overexpressed in cancer, prosurvival protein 1	numeric
seq.14619.8	Zinc finger protein 526	numeric
seq.14623.26	Small ubiquitin-related modifier 3	numeric
seq.14624.51	Transcriptional repressor CTCF	numeric
seq.14628.72	F-box only protein 3	numeric
seq.14631.22	Dual specificity protein phosphatase 16	numeric
seq.14633.26	Transmembrane protein 185A	numeric
seq.14634.13	Lutropin-choriogonadotropic hormone receptor	numeric
seq.14636.25	Ribonuclease UK114	numeric
seq.14645.253	Glutathione S-transferase A4	numeric
seq.14655.1	DnaJ homolog subfamily C member 17	numeric
seq.14662.6	Myeloid zinc finger 1	numeric
seq.14663.44	E3 ubiquitin-protein ligase RNF8	numeric
seq.14670.1	Ski-like protein	numeric
seq.14674.63	Protein kinase C and casein kinase substrate in neurons protein 3	numeric
seq.14675.20	Eukaryotic translation initiation factor 4B	numeric
seq.14684.17	Calpain-2 catalytic subunit	numeric
seq.14685.17	RAC-beta serine/threonine-protein kinase	numeric
seq.14687.6	Perilipin-3	numeric
seq.14688.6	Tyrosine-protein phosphatase non-receptor type 7	numeric
seq.14689.3	Protein SEC13 homolog	numeric
seq.14692.3	Zinc finger protein 276	numeric
seq.14696.45	Tryptase beta-2	numeric
seq.14703.6	Prokineticin-1	numeric
seq.14705.1	Vascular endothelial growth factor D	numeric
seq.14708.59	Complement component C8 gamma chain	numeric
seq.14711.27	Cystatin-M	numeric
seq.14713.46	Azurocidin	numeric
seq.14747.9	Cytokine receptor-like factor 1	numeric
seq.14748.31	Rho GTPase-activating protein 5	numeric
seq.14755.4	Lactotransferrin	numeric
seq.14756.29	Intercellular adhesion molecule 2	numeric
seq.14757.144	Fibroblast growth factor 8 isoform B	numeric
seq.14759.149	Cadherin-1	numeric
seq.15295.81	Insulin-like growth factor II:Mature	numeric
seq.15297.3	Protein S100-A3	numeric
seq.15298.199	Neuropilin and tolloid-like protein 1	numeric
seq.15299.102	LDLR chaperone MESD	numeric
seq.15300.66	Coiled-coil domain-containing protein 134	numeric
seq.15301.24	Acrosomal protein SP-10	numeric
seq.15303.63	Protein S100-A5	numeric
seq.15304.1	Regenerating islet-derived protein 3-alpha	numeric
seq.15305.7	Secretagogin	numeric
seq.15306.20	Immunoglobulin J chain	numeric
seq.15308.108	Brorin	numeric
seq.15310.61	Protein regulator of cytokinesis 1	numeric
seq.15312.14	Protein argonaute-1	numeric
seq.15313.28	Mitotic spindle assembly checkpoint protein MAD2A	numeric
seq.15314.49	Chloride intracellular channel protein 4	numeric
seq.15315.64	Copper homeostasis protein cutC homolog	numeric
seq.15316.262	Thioredoxin-like protein 4B	numeric
seq.15318.75	Protein S100-A10	numeric
seq.15319.226	Cyclin-A1	numeric
seq.15321.8	Complexin-2	numeric
seq.15322.35	Death domain-containing protein CRADD	numeric
seq.15323.112	Protein argonaute-3	numeric
seq.15324.58	Ferritin light chain	numeric
seq.15325.14	Neuromodulin	numeric
seq.15326.64	Guanylate-binding protein 1	numeric
seq.15329.167	Ragulator complex protein LAMTOR2	numeric
seq.15331.47	Histone-binding protein RBBP4	numeric
seq.15333.11	Stromal cell-derived factor 2	numeric
seq.15336.7	Selenoprotein M	numeric
seq.15339.32	Cofilin-2	numeric
seq.15343.337	Kininogen, HMW, Two Chain	numeric
seq.15346.31	Interferon gamma	numeric
seq.15347.12	Hemopexin	numeric
seq.15358.28	Neuroendocrine protein 7B2	numeric
seq.15361.37	Ankyrin repeat domain-containing protein 1	numeric
seq.15363.32	Apolipoprotein A-V	numeric
seq.15364.101	Apolipoprotein C-I	numeric
seq.15365.41	Adhesion G protein-coupled receptor B3	numeric
seq.15367.38	BPI fold-containing family B member 1	numeric
seq.15368.3	BMP-binding endothelial regulator protein	numeric
seq.15370.5	BolA-like protein 1	numeric
seq.15372.43	Bromodomain-containing protein 2	numeric
seq.15374.15	Gastrokine-1	numeric
seq.15375.49	Carboxypeptidase B	numeric
seq.15376.134	Cathepsin E	numeric
seq.15381.45	Discoidin domain-containing receptor 2	numeric
seq.15383.200	Endothelin-3	numeric
seq.15384.15	Klotho	numeric
seq.15385.116	Fatty acid-binding protein, intestinal	numeric
seq.15386.7	Fatty acid-binding protein, adipocyte	numeric
seq.15387.44	Neuropilin-2	numeric
seq.15388.24	Low affinity immunoglobulin gamma Fc region receptor III-A	numeric
seq.15389.1	Frataxin, mitochondrial	numeric
seq.15390.3	Galanin	numeric
seq.15391.114	Growth arrest-specific protein 6	numeric
seq.15394.79	Netrin receptor UNC5B	numeric
seq.15395.15	Glutathione S-transferase Mu 1	numeric
seq.15398.2	FAD-linked sulfhydryl oxidase ALR	numeric
seq.15402.2	DNA-binding protein inhibitor ID-1	numeric
seq.15403.53	DNA-binding protein inhibitor ID-2	numeric
seq.15404.3	Interferon alpha-21	numeric
seq.15405.23	Interferon alpha-4	numeric
seq.15412.40	Baculoviral IAP repeat-containing protein 7	numeric
seq.15413.3	Phosphatidylcholine-sterol acyltransferase	numeric
seq.15414.316	L-lactate dehydrogenase A chain	numeric
seq.15416.54	Lysozyme g-like protein 2	numeric
seq.15417.3	Serpin B5	numeric
seq.15418.25	Mitogen-activated protein kinase 10	numeric
seq.15419.15	Matrix metalloproteinase-20	numeric
seq.15422.12	Myelin P2 protein	numeric
seq.15426.5	Sialidase-1	numeric
seq.15427.35	Lysyl oxidase homolog 3	numeric
seq.15430.165	Opticin	numeric
seq.15431.31	Ornithine carbamoyltransferase, mitochondrial	numeric
seq.15432.1	Otoraplin	numeric
seq.15433.4	Proto-oncogene tyrosine-protein kinase Src	numeric
seq.15434.5	Prepronociceptin	numeric
seq.15435.4	Purine nucleoside phosphorylase	numeric
seq.15436.40	Receptor activity-modifying protein 1	numeric
seq.15437.11	Receptor activity-modifying protein 3	numeric
seq.15439.21	Rho-related GTP-binding protein RhoE	numeric
seq.15440.57	Neuroendocrine convertase 2	numeric
seq.15441.6	Ganglioside GM2 activator	numeric
seq.15444.45	Serpin B4	numeric
seq.15446.25	Neuregulin-1, sensory and motor neuron-derived factor isoform	numeric
seq.15447.45	Sorbitol dehydrogenase	numeric
seq.15448.47	Sequestosome-1	numeric
seq.15449.33	T-cell immunoglobulin and mucin domain-containing protein 4	numeric
seq.15452.5	5'-Nucleotidase	numeric
seq.15453.3	Alpha-1-microglobulin	numeric
seq.15455.40	Disintegrin and metalloproteinase domain-containing protein 15:Extracellular domain	numeric
seq.15457.14	Aminopeptidase N	numeric
seq.15460.9	Dipeptidyl peptidase 4	numeric
seq.15462.28	T-cell surface glycoprotein CD8 alpha chain	numeric
seq.15465.79	Protein canopy homolog 4	numeric
seq.15466.30	Collagen alpha-1(IX) chain	numeric
seq.15467.10	Collagen triple helix repeat-containing protein 1	numeric
seq.15468.14	Complement factor H-related protein 1	numeric
seq.15470.11	Beta-hexosaminidase subunit beta	numeric
seq.15471.29	Pancreatic lipase-related protein 2	numeric
seq.15472.16	Low-density lipoprotein receptor-related protein 11	numeric
seq.15474.7	Peptidyl-prolyl cis-trans isomerase NIMA-interacting 1	numeric
seq.15475.4	Phospholipid transfer protein	numeric
seq.15476.6	Regenerating islet-derived protein 3-gamma	numeric
seq.15480.2	Vascular non-inflammatory molecule 2	numeric
seq.15481.45	Antibacterial protein LL-37	numeric
seq.15482.12	Alpha-2-macroglobulin-like protein 1	numeric
seq.15483.377	Agrin	numeric
seq.15486.126	Amiloride-sensitive amine oxidase [copper-containing]	numeric
seq.15487.164	Liver carboxylesterase 1	numeric
seq.15491.20	Endosialin	numeric
seq.15492.1	Cysteine-rich motor neuron 1 protein:Extracellular domain	numeric
seq.15494.11	Fibroblast growth factor-binding protein 1	numeric
seq.15495.9	Folate receptor gamma	numeric
seq.15497.9	Heparan sulfate glucosamine 3-O-sulfotransferase 1	numeric
seq.15499.11	Attractin	numeric
seq.15503.15	Left-right determination factor 2	numeric
seq.15503.20	Left-right determination factor 2	numeric
seq.15504.39	Baculoviral IAP repeat-containing protein 7 Isoform beta	numeric
seq.15506.34	Low-density lipoprotein receptor-related protein 12	numeric
seq.15509.2	Alpha-N-acetylglucosaminidase	numeric
seq.15511.37	Neuronal pentraxin receptor	numeric
seq.15513.108	Prostasin	numeric
seq.15514.26	Cholinesterase	numeric
seq.15515.2	Serum amyloid A-1 protein	numeric
seq.15516.12	Serum amyloid A-4 protein	numeric
seq.15521.4	Calsyntenin-1	numeric
seq.15522.2	Golgi-associated plant pathogenesis-related protein 1	numeric
seq.15523.9	Delta-aminolevulinic acid dehydratase	numeric
seq.15524.30	Phosphoglycerate mutase 2	numeric
seq.15525.294	Alcohol dehydrogenase 1C	numeric
seq.15526.33	Glutathione synthetase	numeric
seq.15527.90	Dihydrolipoyl dehydrogenase, mitochondrial	numeric
seq.15529.33	Cysteine and glycine-rich protein 1	numeric
seq.15530.33	Ephrin type-B receptor 4	numeric
seq.15533.97	Macrophage scavenger receptor types I and II:Extracellular domain	numeric
seq.15534.26	Malate dehydrogenase, mitochondrial	numeric
seq.15535.3	Serine protease 27	numeric
seq.15539.15	SLIT and NTRK-like protein 1	numeric
seq.15540.6	Vimentin	numeric
seq.15542.19	Creatine kinase U-type, mitochondrial	numeric
seq.15544.25	Kallikrein-14	numeric
seq.15545.13	Calcineurin subunit B type 1	numeric
seq.15548.35	D-3-phosphoglycerate dehydrogenase	numeric
seq.15553.22	Acetylcholinesterase	numeric
seq.15556.49	Alpha-amylase 2B	numeric
seq.15558.63	Glutamyl aminopeptidase	numeric
seq.15559.5	Anthrax toxin receptor 2	numeric
seq.15560.52	Transcobalamin-2	numeric
seq.15562.24	Beta-glucuronidase	numeric
seq.15565.102	Mucin-16	numeric
seq.15566.10	Calponin-1	numeric
seq.15567.2	T-cell surface glycoprotein CD3 zeta chain	numeric
seq.15569.15	Collagen Type II	numeric
seq.15570.99	Complement receptor type 2	numeric
seq.15573.110	Neurocan core protein	numeric
seq.15574.37	Cyclin-A2	numeric
seq.15576.158	Eosinophil cationic protein	numeric
seq.15579.26	Ectonucleotide pyrophosphatase/phosphodiesterase family member 6	numeric
seq.15580.2	Ephrin type-A receptor 7	numeric
seq.15581.16	Fibronectin type 3 and ankyrin repeat domains protein 1	numeric
seq.15582.25	Ficolin-1	numeric
seq.15583.18	Fc receptor-like B	numeric
seq.15584.9	Complement factor H-related protein 2	numeric
seq.15585.304	Fibulin-5	numeric
seq.15587.20	Folate receptor beta	numeric
seq.15588.17	Alpha-galactosidase A	numeric
seq.15589.1	Vitamin D-binding protein	numeric
seq.15591.28	Glutathione peroxidase 1	numeric
seq.15594.47	Serine protease HTRA1	numeric
seq.15596.7	Protein HEXIM1	numeric
seq.15602.43	Interleukin-6 receptor subunit alpha	numeric
seq.15603.20	Integrin alpha-2	numeric
seq.15604.18	Mitogen-activated protein kinase 9	numeric
seq.15606.19	Keratin, type I cytoskeletal 19	numeric
seq.15607.56	Pyruvate kinase PKLR	numeric
seq.15608.5	Ribosomal protein S6 kinase beta-1	numeric
seq.15610.72	Cytosol aminopeptidase	numeric
seq.15612.5	Protein lin-7 homolog B	numeric
seq.15613.16	Pancreatic triacylglycerol lipase	numeric
seq.15614.168	Leukocyte immunoglobulin-like receptor subfamily A member 2	numeric
seq.15615.8	Leukocyte immunoglobulin-like receptor subfamily B member 3	numeric
seq.15617.8	Cytokine SCM-1 beta	numeric
seq.15619.49	Myelin-oligodendrocyte glycoprotein	numeric
seq.15620.4	Neuroligin-1	numeric
seq.15622.13	Opioid-binding protein/cell adhesion molecule	numeric
seq.15623.1	Programmed cell death protein 1	numeric
seq.15626.223	Basement membrane-specific heparan sulfate proteoglycan core protein	numeric
seq.15627.83	RAC-alpha serine/threonine-protein kinase	numeric
seq.15631.18	Pregnancy-specific beta-1-glycoprotein 1	numeric
seq.15633.6	Retinol-binding protein 4	numeric
seq.15634.139	Slit homolog 1 protein	numeric
seq.15635.4	SPARC-related modular calcium-binding protein 2	numeric
seq.15636.49	VPS10 domain-containing receptor SorCS1	numeric
seq.15637.38	VPS10 domain-containing receptor SorCS3	numeric
seq.15640.54	Transgelin	numeric
seq.15641.20	Tomoregulin-1	numeric
seq.15644.1	Biotinidase	numeric
seq.15653.9	Collagen alpha-1(X) chain	numeric
seq.15666.21	Bone morphogenetic protein 2	numeric
seq.15667.39	Bone morphogenetic protein 4	numeric
seq.15668.19	Bone morphogenetic protein 8B	numeric
seq.15669.7	Serine/threonine-protein kinase B-raf	numeric
seq.15670.15	Complement C1q-like protein 2	numeric
seq.15674.3	B-cell antigen receptor complex-associated protein alpha chain	numeric
seq.15675.3	CCAAT/enhancer-binding protein beta	numeric
seq.15678.71	Dickkopf-related protein 2	numeric
seq.15686.49	Inhibin beta C chain	numeric
seq.15688.30	Protein ERGIC-53	numeric
seq.15692.300	Nodal homolog	numeric
seq.15693.9	Progesterone receptor	numeric
seq.15698.6	Alpha-taxilin	numeric
seq.16015.19	Alanine aminotransferase 1	numeric
seq.16021.30	Cadherin-8	numeric
seq.16035.8	Vascular endothelial growth factor receptor 3	numeric
seq.16043.30	SHC-transforming protein 1:Phosphotyrosine Interaction Domain	numeric
seq.16049.43	Oxidized low-density lipoprotein receptor 1	numeric
seq.16055.3	Complement factor H-related protein 5	numeric
seq.16057.6	Cation-independent mannose-6-phosphate receptor	numeric
seq.16060.99	Nidogen-2	numeric
seq.16070.7	Wnt inhibitory factor 1	numeric
seq.16074.12	GRB2-related adapter protein 2	numeric
seq.16079.2	Tyrosine-protein kinase Tec	numeric
seq.16081.38	Aldo-keto reductase family 1 member B10	numeric
seq.16288.17	Ephrin type-A receptor 4	numeric
seq.16292.288	Gastric inhibitory polypeptide	numeric
seq.16293.1	Somatoliberin	numeric
seq.16296.43	Leucine-rich repeat-containing G-protein coupled receptor 5	numeric
seq.16297.14	Roundabout homolog 4	numeric
seq.16298.84	Group IID secretory phospholipase A2	numeric
seq.16299.13	T-cell immunoreceptor with Ig and ITIM domains	numeric
seq.16300.4	Triggering receptor expressed on myeloid cells 2	numeric
seq.16302.11	BPI fold-containing family A member 2	numeric
seq.16304.6	Leucine-rich repeat-containing G-protein coupled receptor 4	numeric
seq.16305.10	Cadherin-11:Extracellular domain	numeric
seq.16307.22	Netrin receptor UNC5D	numeric
seq.16308.14	B- and T-lymphocyte attenuator	numeric
seq.16309.30	Dickkopf-like protein 1	numeric
seq.16312.45	Cadherin-6	numeric
seq.16315.105	Vascular endothelial growth factor receptor 1	numeric
seq.16317.20	Desmoglein-3	numeric
seq.16318.12	Serine/threonine-protein kinase receptor R3	numeric
seq.16320.139	CD320 antigen	numeric
seq.16322.10	Marginal zone B- and B1-cell-specific protein	numeric
seq.16323.8	Neurexin-3	numeric
seq.16324.38	Toll-like receptor 1:Extracellular domain	numeric
seq.16536.3	High mobility group protein HMG-I/HMG-Y	numeric
seq.16551.14	Signal transducer and activator of transcription 5B	numeric
seq.16558.2	Myocilin	numeric
seq.16561.9	Alpha-1B-glycoprotein	numeric
seq.16583.8	Bis(5'-nucleosyl)-tetraphosphatase [asymmetrical]	numeric
seq.16585.16	N-acetyllactosaminide beta-1,3-N-acetylglucosaminyltransferase 4	numeric
seq.16587.1	Beta-casein	numeric
seq.16588.10	78 kDa glucose-regulated protein	numeric
seq.16591.71	Acidic mammalian chitinase	numeric
seq.16593.3	FAS-associated death domain protein	numeric
seq.16594.44	Fas apoptotic inhibitory molecule 1	numeric
seq.16596.25	Glutaredoxin-3	numeric
seq.16597.11	Glutaredoxin-related protein 5, mitochondrial	numeric
seq.16599.38	GPN-loop GTPase 1	numeric
seq.16605.2	Complement C1q and tumor necrosis factor-related protein 9A	numeric
seq.16606.85	Aldose reductase	numeric
seq.16607.78	Gelsolin	numeric
seq.16609.106	Kin of IRRE-like protein 2	numeric
seq.16610.13	Low-density lipoprotein receptor-related protein 10	numeric
seq.16612.28	Syndecan-3	numeric
seq.16613.3	Cadherin-17	numeric
seq.16614.27	R-spondin-1	numeric
seq.16616.137	Beta-enolase	numeric
seq.16617.14	Caspase-14	numeric
seq.16618.7	Early activation antigen CD69	numeric
seq.16620.26	Lymphocyte antigen 75	numeric
seq.16621.77	NAD(P)H-hydrate epimerase	numeric
seq.16746.12	Activin B	numeric
seq.16748.1	Bone morphogenetic protein 3	numeric
seq.16749.79	Growth/differentiation factor 10	numeric
seq.16751.15	Natriuretic peptides B	numeric
seq.16753.46	Collagen alpha-2(VI) chain	numeric
seq.16754.40	Peripheral plasma membrane protein CASK	numeric
seq.16755.195	Growth/differentiation factor 3	numeric
seq.16756.30	Growth/differentiation factor 7	numeric
seq.16758.96	Hepatoma-derived growth factor	numeric
seq.16760.2	Interleukin-26	numeric
seq.16763.11	Leukocyte cell-derived chemotaxin-2	numeric
seq.16765.52	Platelet basic protein	numeric
seq.16768.3	Junction plakoglobin	numeric
seq.16769.20	Ras-related C3 botulinum toxin substrate 3	numeric
seq.16770.3	Lithostathine-1-beta	numeric
seq.16773.29	Signal peptide, CUB and EGF-like domain-containing protein 3	numeric
seq.16780.6	Heat shock 70 kDa protein 1A	numeric
seq.16781.2	Cytosolic endo-beta-N-acetylglucosaminidase	numeric
seq.16785.45	Defensin-5	numeric
seq.16792.4	Sialic acid-binding Ig-like lectin 5	numeric
seq.16802.31	OCIA domain-containing protein 1	numeric
seq.16803.4	Calretinin	numeric
seq.16805.5	cGMP-specific 3',5'-cyclic phosphodiesterase	numeric
seq.16807.35	Troponin T, fast skeletal muscle	numeric
seq.16809.1	Nucleoside diphosphate kinase, mitochondrial	numeric
seq.16810.3	Rab GDP dissociation inhibitor alpha	numeric
seq.16814.13	Four and a half LIM domains protein 1	numeric
seq.16818.200	CUB domain-containing protein 1	numeric
seq.16823.75	Apolipoprotein L3	numeric
seq.16825.20	Ataxin-3	numeric
seq.16828.8	Collagen alpha-1(VI) chain	numeric
seq.16831.7	Docking protein 1	numeric
[truncated: 5,372 more rows]

## Sheet: SDF2
SeqID	protein	UniProt ID	GeneID	time	estimate	SE	df	t.ratio	p-value	adjusted p-value
seq.10000.28	Beta-crystallin B2	P43320	CRYBB2	baseline	0.0149351	0.0758273	334.269	-0.196962	0.843977	0.938906
seq.10001.7	RAF proto-oncogene serine/threonine-protein kinase	P04049	RAF1	baseline	-0.0111718	0.0598468	444.841	0.186673	0.852002	0.941636
seq.10003.15	Zinc finger protein 41	P51814	ZNF41	baseline	0.00408315	0.0576836	375.151	-0.0707853	0.943606	0.981464
seq.10006.25	ETS domain-containing protein Elk-1	P19419	ELK1	baseline	0.00297175	0.0572399	334.21	-0.0519175	0.958625	0.987084
seq.10008.43	Guanylyl cyclase-activating protein 1	P43080	GUCA1A	baseline	-0.0512394	0.0345271	416.672	1.48404	0.138555	0.426099
seq.10010.10	Beclin-1	Q14457	BECN1	baseline	-0.0406878	0.0282769	402.975	1.43891	0.150953	0.440847
seq.10011.65	Inositol polyphosphate 5-phosphatase OCRL-1	Q01968	OCRL	baseline	-0.0779014	0.0487628	422.505	1.59756	0.110889	0.382625
seq.10012.5	SAM pointed domain-containing Ets transcription factor	O95238	SPDEF	baseline	-0.0198416	0.0366401	442.944	0.541528	0.588416	0.813248
seq.10014.31	Zinc finger protein SNAI2	O43623	SNAI2	baseline	0.0366999	0.0671028	353.426	-0.546921	0.584778	0.811319
seq.10015.119	Voltage-gated potassium channel subunit beta-2	Q13303	KCNAB2	baseline	-0.0174314	0.0637011	365.295	0.273643	0.784513	0.910783
seq.10022.207	DNA polymerase eta	Q9Y253	POLH	baseline	-0.137438	0.0624679	393.942	2.20013	0.0283774	0.189454
seq.10023.32	Vitamin D3 receptor	P11473	VDR	baseline	-0.10346	0.0410992	440.319	2.51732	0.0121792	0.113374
seq.10024.44	4-hydroxy-2-oxoglutarate aldolase, mitochondrial	Q86XE5	HOGA1	baseline	-0.0212555	0.057679	401.688	0.368514	0.712684	0.877045
seq.10025.1	Dihydrolipoyl dehydrogenase, mitochondrial	P09622	DLD	baseline	0.314146	0.0813013	423.031	-3.86397	0.000129055	0.00462406
seq.10030.8	Adenine DNA glycosylase	Q9UIF7	MUTYH	baseline	0.0119963	0.0706849	365.61	-0.169716	0.865327	0.947168
seq.10035.6	Dual specificity protein phosphatase 4	Q13115	DUSP4	baseline	-0.0500624	0.0285578	419.588	1.75302	0.0803286	0.328405
seq.10036.201	Zinc fingers and homeoboxes protein 3	Q9H4I2	ZHX3	baseline	-0.00594974	0.0467928	424.17	0.127151	0.898881	0.962081
seq.10037.98	Sialic acid-binding Ig-like lectin 12:Ig-like V-type 2 domain, Isoform long	Q96PQ1	SIGLEC12	baseline	-0.100289	0.0811105	385.11	1.23644	0.217047	0.521957
seq.10039.32	Purine nucleoside phosphorylase	P00491	PNP	baseline	0.155774	0.130506	455.928	-1.19362	0.233247	0.536568
seq.10040.63	Tumor protein 63	Q9H3D4	TP63	baseline	0.202198	0.0730818	360.846	-2.76674	0.00595358	0.0698971
seq.10041.3	Hepatocyte nuclear factor 4-alpha	P41235	HNF4A	baseline	-0.0133165	0.0610001	429.343	0.218304	0.827296	0.932781
seq.10042.8	Serine/threonine-protein kinase Sgk3	Q96BR1	SGK3	baseline	0.0127407	0.037657	414.898	-0.338335	0.735282	0.890497
seq.10043.31	Bromodomain-containing protein 4	O60885	BRD4	baseline	0.11057	0.0341667	442.637	-3.23618	0.00130231	0.0236659
seq.10044.12	Protein Wnt-10a	Q9GZT5	WNT10A	baseline	-0.163281	0.0738305	453.625	2.21156	0.0274948	0.185316
seq.10045.47	Cullin-3	Q13618	CUL3	baseline	-0.00623148	0.0590728	452.166	0.105488	0.916035	0.9683
seq.10046.55	Baculoviral IAP repeat-containing protein 2	Q13490	BIRC2	baseline	-0.029627	0.0561973	366.087	0.527195	0.598377	0.818938
seq.10047.12	Neutrophil cytosol factor 2	P19878	NCF2	baseline	0.0804071	0.131658	454.969	-0.610725	0.541687	0.787178
seq.10048.7	Core-binding factor subunit beta	Q13951	CBFB	baseline	0.0601295	0.0285119	437.303	-2.10893	0.0355187	0.215637
seq.10049.112	Telomeric repeat-binding factor 1	P54274	TERF1	baseline	-0.0162863	0.0312457	415.424	0.521234	0.602481	0.820888
seq.10053.5	Integrin-linked protein kinase	Q13418	ILK	baseline	-0.1759	0.0912218	451.401	1.92827	0.0544482	0.269088
seq.10054.3	Gigaxonin	Q9H2C0	GAN	baseline	-0.0373571	0.0613066	395.056	0.609349	0.542643	0.787833
seq.10056.5	Forkhead box protein M1	Q08050	FOXM1	baseline	0.121272	0.0710323	454.596	-1.70728	0.0884526	0.344911
seq.10058.1	UV excision repair protein RAD23 homolog A	P54725	RAD23A	baseline	0.300078	0.091416	453.473	-3.28255	0.00110823	0.0208973
seq.10063.10	E3 ubiquitin-protein ligase FANCL	Q9NW38	FANCL	baseline	0.096075	0.0539325	343.839	-1.78139	0.0757306	0.319406
seq.10064.12	Putative hydrolase RBBP9	O75884	RBBP9	baseline	0.0312172	0.0309301	452.633	-1.00928	0.313378	0.623473
seq.10069.2	Peptidyl-prolyl cis-trans isomerase NIMA-interacting 1	Q13526	PIN1	baseline	0.131881	0.0416991	455.094	-3.16268	0.00166779	0.0283027
seq.10070.22	1-phosphatidylinositol 4,5-bisphosphate phosphodiesterase gamma-2	P16885	PLCG2	baseline	-0.0395642	0.0681775	447.778	0.580311	0.561997	0.799275
seq.10073.22	Tyrosyl-DNA phosphodiesterase 1	Q9NUW8	TDP1	baseline	0.129243	0.0460703	446.6	-2.80534	0.0052459	0.0647933
seq.10074.128	Bromodomain-containing protein 2	P25440	BRD2	baseline	-0.108678	0.0517281	356.687	2.10095	0.0363468	0.218655
seq.10075.75	Acyl-CoA-binding domain-containing protein 6	Q9BR61	ACBD6	baseline	0.038343	0.102532	453.294	-0.37396	0.708609	0.874919
seq.10076.1	AP-4 complex subunit mu-1	O00189	AP4M1	baseline	-0.029742	0.0561571	441.548	0.529621	0.596641	0.818349
seq.10078.5	BAG family molecular chaperone regulator 3	O95817	BAG3	baseline	0.0214841	0.0252951	425.377	-0.849337	0.396171	0.685774
seq.10080.9	Translation initiation factor eIF-2B subunit alpha	Q14232	EIF2B1	baseline	-0.0452622	0.117912	451.54	0.383863	0.701261	0.8711
seq.10081.17	DNA-binding protein SATB2	Q9UPW6	SATB2	baseline	-0.0784753	0.0398354	436.442	1.96999	0.0494716	0.257918
seq.10082.251	Neurofilament light polypeptide	P07196	NEFL	baseline	0.23444	0.0700727	443.521	-3.34567	0.000890635	0.0181196
seq.10085.25	Steroidogenic acute regulatory protein, mitochondrial	P49675	STAR	baseline	0.0329316	0.0386687	450.626	-0.851634	0.394869	0.685222
seq.10086.39	Cystathionine beta-synthase	P35520	CBS	baseline	-0.0688966	0.0490341	404.319	1.40508	0.160767	0.454817
seq.10087.10	Alpha-crystallin A chain	P02489	CRYAA	baseline	0.0333417	0.0345244	397.644	-0.965743	0.33476	0.642942
seq.10088.37	Adenine phosphoribosyltransferase	P07741	APRT	baseline	-0.0672441	0.134768	453.316	0.498962	0.618048	0.828719
seq.10089.7	N-acetylserotonin O-methyltransferase-like protein	O95671	ASMTL	baseline	-0.0724061	0.0754866	396.464	0.959192	0.338047	0.645073
seq.10336.3	E3 ubiquitin-protein ligase CHIP	Q9UNE7	STUB1	baseline	-0.000135204	0.10672	452.456	0.00126691	0.99899	0.999885
seq.10339.48	Gamma-enolase	P09104	ENO2	baseline	0.300836	0.131651	452.332	-2.28509	0.0227693	0.16472
seq.10342.55	E3 SUMO-protein ligase PIAS4	Q8N2W9	PIAS4	baseline	-0.0510493	0.0482937	434.04	1.05706	0.291072	0.601022
seq.10344.334	Interleukin-10 receptor subunit alpha	Q13651	IL10RA	baseline	-0.0945475	0.0435759	436.026	2.16972	0.0305674	0.197946
seq.10346.5	Signal transducer and activator of transcription 3	P40763	STAT3	baseline	-0.0585895	0.0745328	447.41	0.786089	0.432231	0.714458
seq.10351.51	Interferon regulatory factor 1	P10914	IRF1	baseline	0.0488158	0.124547	333.558	-0.391946	0.695349	0.868354
seq.10354.57	Signal transducer and activator of transcription 3	P40763	STAT3	baseline	-0.0486551	0.0883744	441.1	0.550557	0.582216	0.809688
seq.10356.21	Transcription factor AP-1	P05412	JUN	baseline	-0.0593698	0.0549926	432.5	1.0796	0.280924	0.590127
seq.10361.25	2'-5'-oligoadenylate synthase 1	P00973	OAS1	baseline	0.0379278	0.0750881	412.106	-0.505111	0.613751	0.826649
seq.10362.35	Myc proto-oncogene protein	P01106	MYC	baseline	-0.0531416	0.0525118	359.275	1.01199	0.312222	0.622106
seq.10363.13	Mothers against decapentaplegic homolog 3	P84022	SMAD3	baseline	-0.0715971	0.0602771	451.025	1.1878	0.235538	0.538706
seq.10364.6	Mothers against decapentaplegic homolog 2	Q15796	SMAD2	baseline	-0.0452626	0.100453	453.001	0.450584	0.652505	0.845807
seq.10365.132	Interleukin-23	P29460|Q9NPF7	IL12B|IL23A	baseline	-0.124627	0.056464	398.522	2.20719	0.0278699	0.18718
seq.10366.11	Platelet-derived growth factor receptor alpha	P16234	PDGFRA	baseline	0.0384694	0.0884123	387.695	-0.435113	0.663722	0.853502
seq.10367.62	Interleukin-12	P29459|P29460	IL12A|IL12B	baseline	0.0278735	0.0498205	354.783	-0.559478	0.576189	0.806708
seq.10370.21	Signal transducer and activator of transcription 1-alpha/beta	P42224	STAT1	baseline	-0.0714542	0.119049	435.875	0.60021	0.548678	0.791564
seq.10372.18	Signal transducer and activator of transcription 6	P42226	STAT6	baseline	-0.0403838	0.0773938	444.653	0.521796	0.602072	0.820706
seq.10382.1	Angiopoietin-related protein 3	Q9Y5C1	ANGPTL3	baseline	0.00102798	0.0560825	448.785	-0.0183298	0.985384	0.994119
seq.10390.21	E3 ubiquitin-protein ligase ZNRF3	Q9ULT6	ZNRF3	baseline	-0.0133889	0.0628306	433.346	0.213095	0.831353	0.934857
seq.10391.1	Angiopoietin-related protein 3	Q9Y5C1	ANGPTL3	baseline	0.0931782	0.0650362	439.338	-1.43271	0.152651	0.442103
seq.10396.6	Induced myeloid leukemia cell differentiation protein Mcl-1	Q07820	MCL1	baseline	0.118167	0.0694865	440.137	-1.70058	0.0897282	0.348276
seq.10398.110	Ankyrin repeat domain-containing protein 1	Q15327	ANKRD1	baseline	0.0152642	0.030121	416.298	-0.506764	0.612589	0.825989
seq.10418.36	Syntaxin-12	Q86Y82	STX12	baseline	0.0227393	0.0842109	442.32	-0.270028	0.787264	0.911178
seq.10419.1	Scavenger receptor class A member 5	Q6ZMJ2	SCARA5	baseline	-0.0447357	0.087272	414.828	0.512601	0.608503	0.824067
seq.10420.30	Fas apoptotic inhibitory molecule 1	Q9NVQ4	FAIM	baseline	-0.106605	0.0527073	446.279	2.02259	0.0437112	0.240602
seq.10424.31	Neural proliferation differentiation and control protein 1	Q9NQX5	NPDC1	baseline	-0.041654	0.0448004	437.261	0.929768	0.353004	0.658134
seq.10425.3	Beta-1,4-galactosyltransferase 5	O43286	B4GALT5	baseline	-0.0487523	0.0317879	446.897	1.53367	0.125818	0.404619
seq.10426.21	Golgi SNAP receptor complex member 2	O14653	GOSR2	baseline	-0.191989	0.0917023	453.71	2.09361	0.036849	0.219706
seq.10428.1	Killer cell immunoglobulin-like receptor 2DS2	P43631	KIR2DS2	baseline	0.132848	0.118629	361.28	-1.11986	0.263518	0.569469
seq.10430.31	4F2 cell-surface antigen heavy chain:Cytoplasmic domain	P08195	SLC3A2	baseline	-0.0208493	0.0738674	349.075	0.282254	0.777916	0.907828
seq.10432.3	Uncharacterized protein KIAA1644	Q3SXP7	SHISAL1	baseline	0.0372662	0.0401175	390.93	-0.928927	0.3535	0.658134
seq.10435.2	N(4)-(beta-N-acetylglucosaminyl)-L-asparaginase	P20933	AGA	baseline	-0.0677595	0.0553389	387.407	1.22445	0.221528	0.525883
seq.10438.19	Granulocyte-macrophage colony-stimulating factor receptor subunit alpha	P15509	CSF2RA	baseline	-0.0499403	0.0385952	414.842	1.29395	0.196402	0.497478
seq.10439.57	Alpha-amylase 2B	P19961	AMY2B	baseline	-0.145737	0.10157	430.622	1.43483	0.152061	0.441798
seq.10440.26	CXADR-like membrane protein:Extracellular domain	Q9H6B4	CLMP	baseline	-0.00135539	0.0482779	407.782	0.0280748	0.977616	0.993245
seq.10442.1	Transmembrane protein 190	Q8WZ59	TMEM190	baseline	-0.0375933	0.0798842	376.201	0.470597	0.638201	0.839232
seq.10445.20	Apolipoprotein M	O95445	APOM	baseline	-0.0348555	0.0513502	425.163	0.67878	0.497646	0.757843
seq.10447.18	Polyadenylate-binding protein 3	Q9H361	PABPC3	baseline	0.24232	0.0646875	434.925	-3.746	0.000203868	0.00632075
seq.10449.31	Protein shisa-2 homolog	Q6UWI4	SHISA2	baseline	-0.0316993	0.0447523	450.16	0.708329	0.479108	0.745453
seq.10451.11	Nucleobindin-1	Q02818	NUCB1	baseline	0.316441	0.0950332	439.472	-3.3298	0.000942329	0.0187872
seq.10453.7	Carcinoembryonic antigen-related cell adhesion molecule 20	Q6UY09	CEACAM20	baseline	-0.130331	0.0809855	351.907	1.60931	0.108445	0.378733
seq.10454.99	DnaJ homolog subfamily C member 16	Q9Y2G8	DNAJC16	baseline	-0.0294395	0.121171	443.555	0.242958	0.80815	0.92159
seq.10455.196	Interleukin-31	Q6EBC2	IL31	baseline	-0.087201	0.111564	380.066	0.781619	0.434925	0.715943
seq.10457.3	Interleukin-18 receptor accessory protein	O95256	IL18RAP	baseline	-0.0411581	0.045629	423.552	0.902016	0.367561	0.670346
seq.10460.1	Chitotriosidase-1	Q13231	CHIT1	baseline	0.0894956	0.143437	378.494	-0.623936	0.533045	0.780792
seq.10462.14	Insulin-like peptide INSL5	Q9Y5Q6	INSL5	baseline	0.0413221	0.08801	389.115	-0.469516	0.638964	0.839232
seq.10463.23	Intestinal-type alkaline phosphatase	P09923	ALPI	baseline	0.0201623	0.0315335	402.796	-0.639394	0.52293	0.774757
seq.10464.6	Anthrax toxin receptor 1	Q9H6X2	ANTXR1	baseline	-0.000520295	0.0405488	400.329	0.0128313	0.989769	0.996195
seq.10470.34	Thioredoxin domain-containing protein 11:C-term	Q6PKC3	TXNDC11	baseline	-0.283074	0.132954	434.278	2.12911	0.0338075	0.209977
seq.10472.53	Tumor necrosis factor receptor superfamily member 14	Q92956	TNFRSF14	baseline	-0.0844116	0.040061	447.825	2.10708	0.0356665	0.216041
seq.10473.2	Trefoil factor 2	Q03403	TFF2	baseline	-0.0781414	0.0931194	336.29	0.839153	0.40198	0.691136
seq.10479.18	Stromelysin-2	P09238	MMP10	baseline	-0.000694224	0.0474419	422.645	0.0146332	0.988332	0.995408
seq.10480.33	CD59 glycoprotein	P13987	CD59	baseline	-0.0403745	0.102568	423.057	0.393635	0.694049	0.867944
seq.10485.56	Melanoma-associated antigen 4	P43358	MAGEA4	baseline	-0.196838	0.150252	452.749	1.31006	0.19084	0.49173
seq.10490.3	Dolichyl-diphosphooligosaccharide--protein glycosyltransferase subunit 1:Cytoplasmic domain	P04843	RPN1	baseline	0.0228055	0.0781047	423.675	-0.291986	0.77044	0.905369
seq.10496.11	Calcium-activated chloride channel regulator 1	A8K7I4	CLCA1	baseline	0.000516947	0.0962294	379.878	-0.00537203	0.995717	0.998883
seq.10499.1	Transmembrane protein 106A	Q96A25	TMEM106A	baseline	-0.0475136	0.0479047	402.811	0.991836	0.321873	0.630861
seq.10505.12	E3 ubiquitin-protein ligase RNF43	Q68DV7	RNF43	baseline	0.0103931	0.0769938	337.36	-0.134987	0.892703	0.959454
seq.10506.53	Membrane-associated progesterone receptor component 2	O15173	PGRMC2	baseline	0.0676401	0.0666729	375.474	-1.01451	0.310995	0.621172
seq.10507.166	Acrosomal protein SP-10	P26436	ACRV1	baseline	0.152282	0.08961	387.677	-1.69939	0.0900483	0.348708
seq.10510.62	SLP adapter and CSK-interacting membrane protein	Q6UWF3	SCIMP	baseline	-0.0928354	0.0736894	348.733	1.25982	0.208576	0.51075
seq.10511.10	Collagen alpha-3(VI) chain:isoform 3	P12111	COL6A3	baseline	-0.0905438	0.201993	452.241	0.448251	0.654187	0.846975
seq.10512.13	Cytokine receptor common subunit beta:Extracellular domain	P32927	CSF2RB	baseline	-0.0607068	0.0371527	378.517	1.63398	0.103095	0.371142
seq.10513.13	Calsenilin	Q9Y2W7	KCNIP3	baseline	0.0701313	0.118132	324.809	-0.593667	0.553148	0.794004
seq.10514.5	Prostaglandin-H2 D-isomerase	P41222	PTGDS	baseline	0.0385341	0.065976	425.573	-0.584062	0.559488	0.797982
seq.10521.10	Matrix-remodeling-associated protein 8:Extracellular domain	Q9BRK3	MXRA8	baseline	0.0328323	0.0390035	397.651	-0.841778	0.400418	0.689387
seq.10527.22	ATP-dependent RNA helicase A	Q08211	DHX9	baseline	-0.106144	0.0483486	435.17	2.19539	0.0286626	0.189988
seq.10528.2	Dipeptidase 1	P16444	DPEP1	baseline	-0.0247011	0.0492247	381.838	0.501804	0.616095	0.827454
seq.10530.8	Proteasome subunit beta type-6	P28072	PSMB6	baseline	0.0415512	0.0478598	448.807	-0.868186	0.385757	0.679304
seq.10531.18	GTPase NRas	P01111	NRAS	baseline	0.113492	0.0816428	454.413	-1.3901	0.165179	0.459773
seq.10534.40	Poly [ADP-ribose] polymerase 1:BRCA1 C-terminal:BRCA1 C-terminus domian	P09874	PARP1	baseline	0.0368716	0.040536	426.589	-0.9096	0.363547	0.666462
seq.10535.25	Cytochrome c oxidase subunit 6A2, mitochondrial	Q02221	COX6A2	baseline	-0.246609	0.126468	366.103	1.94997	0.0519429	0.264681
seq.10539.30	CD99 antigen-like protein 2	Q8TCZ2	CD99L2	baseline	-0.0661679	0.0423177	441.164	1.5636	0.118629	0.393788
seq.10546.2	Thrombospondin-type laminin G domain and EAR repeat-containing protein	Q8WU66	TSPEAR	baseline	0.0251068	0.0759519	375.633	-0.330562	0.741159	0.893363
seq.10550.37	Bone morphogenetic protein receptor type-1B	O00238	BMPR1B	baseline	-0.0920821	0.0335388	446.238	2.74554	0.00628511	0.0730983
seq.10551.7	Linker for activation of T-cells family member 1	O43561	LAT	baseline	-0.0397752	0.188833	339.052	0.210637	0.833297	0.935796
seq.10552.88	NKG2-F type II integral membrane protein	O43908	KLRC4	baseline	0.173392	0.108119	323.636	-1.60371	0.109752	0.379808
seq.10553.8	Torsin-1A-interacting protein 2	Q8NFQ8	TOR1AIP2	baseline	-0.03033	0.0503634	448.94	0.602223	0.54733	0.790854
seq.10554.23	Beta-galactosidase	P16278	GLB1	baseline	-0.0711211	0.0994884	445.227	0.714868	0.475065	0.743727
seq.10557.6	Testis-expressed sequence 29 protein	Q8N6K0	TEX29	baseline	0.0794829	0.0724465	440.851	-1.09713	0.273185	0.581329
seq.10558.26	Protocadherin-9	Q9HC56	PCDH9	baseline	-0.0793644	0.0816818	427.245	0.971629	0.331785	0.640467
seq.10560.1	Integral membrane protein 2C:N-term	Q9NQX7	ITM2C	baseline	-0.0831104	0.0577492	414.113	1.43916	0.15086	0.440743
seq.10561.5	Peptidoglycan recognition protein 3	Q96LB9	PGLYRP3	baseline	-0.106364	0.0578749	445.251	1.83783	0.0667537	0.301105
seq.10562.42	Neuropilin and tolloid-like protein 2	Q8NC67	NETO2	baseline	0.0266579	0.0824495	419.17	-0.323324	0.746611	0.895322
seq.10563.13	LysM and putative peptidoglycan-binding domain-containing protein 3	Q7Z3D4	LYSMD3	baseline	-0.00865052	0.0520027	445.816	0.166347	0.867959	0.947796
seq.10565.19	SLIT and NTRK-like protein 3	O94933	SLITRK3	baseline	-0.0713222	0.108839	350.236	0.655299	0.512705	0.768428
seq.10569.28	Microfibrillar-associated protein 2	P55001	MFAP2	baseline	-0.00870702	0.0424523	449.224	0.205101	0.837586	0.937382
seq.10571.14	Alpha-1,3-mannosyl-glycoprotein 2-beta-N-acetylglucosaminyltransferase	P26572	MGAT1	baseline	-0.0924533	0.128054	358.367	0.721988	0.470773	0.742953
seq.10572.65	Cystatin-8	O60676	CST8	baseline	-0.185021	0.069197	431.48	2.67383	0.00778363	0.0856718
seq.10574.10	Beta-2-microglobulin	P61769	B2M	baseline	-0.220117	0.120322	414.038	1.82939	0.0680598	0.303451
seq.10575.31	Poly(U)-binding-splicing factor PUF60	Q9UHX1	PUF60	baseline	0.205591	0.0776157	440.745	-2.64883	0.00836713	0.0898963
seq.10576.7	Plexin domain-containing protein 2:Extracellular domain	Q6UX71	PLXDC2	baseline	0.00456562	0.0355979	426.915	-0.128255	0.898007	0.961554
seq.10580.14	Surfactant-associated protein 2	Q6UW10	SFTA2	baseline	-0.149228	0.0582066	384.61	2.56376	0.0107336	0.104714
seq.10582.36	Protein O-mannose kinase	Q9H5K3	POMK	baseline	0.0218558	0.0808706	445.668	-0.270256	0.787089	0.911148
seq.10583.1	Transmembrane protein 108	Q6UXF1	TMEM108	baseline	-0.0567732	0.117481	316.504	0.483254	0.62925	0.835042
seq.10584.7	NADH dehydrogenase [ubiquinone] iron-sulfur protein 4, mitochondrial	O43181	NDUFS4	baseline	-0.0918416	0.114232	408.669	0.803991	0.42187	0.709108
seq.10588.39	Lactosylceramide alpha-2,3-sialyltransferase	Q9UNP4	ST3GAL5	baseline	-0.106777	0.0549818	390.892	1.94204	0.05285	0.266566
seq.10589.7	Retinoic acid early transcript 1L protein	Q5VY80	RAET1L	baseline	-0.0733906	0.0969023	358.67	0.757367	0.449327	0.725298
seq.10600.24	Calmegin	O14967	CLGN	baseline	-0.154886	0.134469	452.658	1.15183	0.249998	0.554934
seq.10603.1	Histatin-3	P15516	HTN3	baseline	-0.197878	0.0812168	444.347	2.43641	0.0152255	0.129077
seq.10605.22	Adipocyte plasma membrane-associated protein	Q9HDC9	APMAP	baseline	-0.104734	0.0626786	367.683	1.67096	0.0955803	0.359064
seq.10606.34	Torsin-1A-interacting protein 1:Perinuclear domain	Q5JTV8	TOR1AIP1	baseline	0.0665551	0.0675299	449.129	-0.985564	0.324878	0.632924
seq.10608.9	Histatin-1	P15515	HTN1	baseline	-0.072805	0.0957198	356.873	0.760605	0.447395	0.723523
seq.10612.18	Procollagen-lysine,2-oxoglutarate 5-dioxygenase 3	O60568	PLOD3	baseline	0.255794	0.0792871	449.516	-3.22617	0.00134617	0.0243465
seq.10613.33	Protein CASC4	Q6P4E1	GOLM2	baseline	0.00657527	0.0674468	444.016	-0.0974882	0.922383	0.971899
seq.10615.18	Myelin protein P0	P25189	MPZ	baseline	0.124773	0.0742229	437.943	-1.68106	0.0934646	0.354906
seq.10616.67	Podocalyxin-like protein 2	Q9NZ53	PODXL2	baseline	0.131675	0.0892041	349.049	-1.47611	0.140815	0.428366
seq.10618.190	Low-density lipoprotein receptor-related protein 2	P98164	LRP2	baseline	0.0909591	0.0776021	380.867	-1.17212	0.241881	0.545117
seq.10620.21	Beta-microseminoprotein	P08118	MSMB	baseline	0.290965	0.151932	371.808	-1.91511	0.056246	0.273349
seq.10621.26	Protein Largen	Q569H4	PRR16	baseline	0.209131	0.0779471	437.773	-2.68299	0.00757311	0.0837936
seq.10623.19	Mucin-1:region 1	P15941	MUC1	baseline	0.00498794	0.0521774	386.696	-0.0955958	0.923891	0.972572
seq.10624.45	Serine protease inhibitor Kazal-type 13	Q1W4C9	SPINK13	baseline	-0.0453301	0.0668321	346.07	0.678269	0.498054	0.75809
seq.10626.116	Alpha-N-acetylgalactosaminide alpha-2,6-sialyltransferase 3	Q8NDV1	ST6GALNAC3	baseline	0.100836	0.0485883	453.938	-2.07531	0.0385201	0.226645
seq.10627.87	Amyloid-like protein 2	Q06481	APLP2	baseline	0.0720145	0.0550038	431.793	-1.30926	0.191141	0.492304
seq.10630.5	Oxidoreductase HTATIP2	Q9BUP3	HTATIP2	baseline	-0.0325065	0.0853777	356.858	0.380737	0.703625	0.872347
seq.10631.9	Membrane-associated progesterone receptor component 2	O15173	PGRMC2	baseline	-0.0899638	0.0423261	451.841	2.12549	0.0340875	0.210682
seq.10636.1	Cell surface glycoprotein CD200 receptor 1:Isoform 4, Cytoplasmic Domain	Q8TD46	CD200R1	baseline	-0.0897058	0.0754875	437.761	1.18835	0.235338	0.538706
seq.10637.50	UPF0577 protein KIAA1324:Extracellular domain	Q6UXG2	ELAPOR1	baseline	-0.162728	0.0562014	441.015	2.89544	0.00397442	0.0531509
seq.10638.1	TERF1-interacting nuclear factor 2	Q9BSI4	TINF2	baseline	-0.102404	0.0375848	424.428	2.72461	0.00670373	0.0760766
seq.10643.16	Noelin-3:Isoform 2, C-term	Q96PB7	OLFM3	baseline	-0.015108	0.0984215	431.202	0.153503	0.878073	0.952835
seq.10647.18	Activating signal cointegrator 1 complex subunit 1	Q8N9N2	ASCC1	baseline	-0.0158402	0.0382962	449.347	0.413624	0.679347	0.86034
seq.10663.42	Insulin-induced gene 1 protein	O15503	INSIG1	baseline	0.0230684	0.0845621	381.219	-0.272798	0.785156	0.910922
seq.10666.7	N-acetylglucosamine-1-phosphotransferase subunit gamma	Q9UJJ9	GNPTG	baseline	-0.0265549	0.039648	413.356	0.669766	0.503381	0.762449
seq.10667.78	Uncharacterized protein C1orf185	Q5T7R7	C1orf185	baseline	-0.0112842	0.0276334	423.679	0.408353	0.683221	0.862606
seq.10668.5	Syntaxin-4	Q12846	STX4	baseline	0.071461	0.0950215	452.914	-0.752051	0.452411	0.726142
seq.10670.26	Semaphorin-3E	O15041	SEMA3E	baseline	-0.137517	0.133543	448.598	1.02976	0.303676	0.614558
seq.10672.75	Pulmonary surfactant-associated protein B	P07988	SFTPB	baseline	-0.14058	0.11027	417.86	1.27487	0.203065	0.50623
seq.10675.223	Thioredoxin-related transmembrane protein 2	Q9Y320	TMX2	baseline	-0.0887039	0.0739658	439.713	1.19926	0.231074	0.534157
seq.10677.9	NADH dehydrogenase [ubiquinone] 1 beta subcomplex subunit 4	O95168	NDUFB4	baseline	-0.173703	0.0692413	436.826	2.50866	0.0124803	0.115329
seq.10693.43	Killer cell lectin-like receptor subfamily G member 2:C-term	A4D1S0	KLRG2	baseline	-0.11702	0.145775	326.761	0.802745	0.422705	0.709428
seq.10695.12	Protein WFDC10B	Q8IUB3	WFDC10B	baseline	-0.00950282	0.0551251	346.584	0.172387	0.863234	0.946535
seq.10699.52	Prolow-density lipoprotein receptor-related protein 1	Q07954	LRP1	baseline	-0.0233529	0.0537253	336.152	0.434672	0.664079	0.853672
seq.10700.10	Immunoglobulin superfamily member 11:Cytoplasmic domain	Q5DX21	IGSF11	baseline	-0.162188	0.168723	338.72	0.961264	0.337105	0.645
seq.10702.1	Collagen alpha-1(XXVIII) chain	Q2UY09	COL28A1	baseline	0.0602498	0.0581082	410.972	-1.03686	0.300413	0.612436
seq.10703.203	Sin3 histone deacetylase corepressor complex component SDS3	Q9H7L9	SUDS3	baseline	0.0231435	0.0538356	430.779	-0.429892	0.667489	0.855018
seq.10704.91	Lymphoid-restricted membrane protein	Q12912	IRAG2	baseline	-0.0160561	0.0871039	391.566	0.184333	0.853848	0.942625
seq.10705.14	Alpha-N-acetylgalactosaminide alpha-2,6-sialyltransferase 3	Q8NDV1	ST6GALNAC3	baseline	0.0295296	0.0439781	380.3	-0.671461	0.502334	0.762069
seq.10708.3	Progonadoliberin-2	O43555	GNRH2	baseline	-0.114541	0.0887051	367.962	1.29126	0.197425	0.49855
seq.10710.23	Zona pellucida-binding protein 2	Q6X784	ZPBP2	baseline	0.0214672	0.0536571	394.44	-0.400082	0.689313	0.865804
seq.10713.151	CMRF35-like molecule 7	A8K4G0	CD300LB	baseline	-0.00129374	0.0588708	403.167	0.021976	0.982478	0.99402
seq.10714.7	Angiotensin-converting enzyme	P12821	ACE	baseline	-0.041595	0.0585151	398.443	0.710841	0.477598	0.744936
seq.10716.35	26S proteasome non-ATPase regulatory subunit 5	Q16401	PSMD5	baseline	-0.0267271	0.045313	378.596	0.589834	0.555654	0.795353
seq.10721.76	Heat shock 70 kDa protein 1A	P0DMV8	HSPA1A	baseline	0.271024	0.0831286	443.651	-3.2603	0.00119867	0.0222076
seq.10722.13	Tyrosine-protein kinase SYK:Protein kinase domain	P43405	SYK	baseline	-0.0449669	0.0699734	445.792	0.642628	0.520796	0.773253
seq.10731.10	Heparan sulfate glucosamine 3-O-sulfotransferase 5	Q8IZT8	HS3ST5	baseline	-0.0492109	0.0462445	437.453	1.06415	0.28785	0.598059
seq.10734.339	Galactose-3-O-sulfotransferase 2	Q9H3Q3	GAL3ST2	baseline	-0.157207	0.112763	451.573	1.39414	0.16396	0.458927
seq.10737.96	Leukocyte elastase inhibitor	P30740	SERPINB1	baseline	0.00498199	0.0950803	455.749	-0.0523977	0.958235	0.987084
seq.10738.11	Fibulin-5	Q9UBX5	FBLN5	baseline	-0.092761	0.0677861	455.291	1.36844	0.171851	0.468984
seq.10741.22	Macrophage colony-stimulating factor 1	P09603	CSF1	baseline	0.120036	0.0863485	438.113	-1.39014	0.165193	0.459773
seq.10743.13	SLIT and NTRK-like protein 1	Q96PX8	SLITRK1	baseline	-0.195336	0.128524	420.181	1.51984	0.129302	0.41061
seq.10746.24	Dickkopf-related protein 3	Q9UBP4	DKK3	baseline	0.0644892	0.085711	423.852	-0.752403	0.452226	0.726142
seq.10748.216	Protocadherin beta-2	Q9Y5E7	PCDHB2	baseline	-0.0223596	0.0589478	382.896	0.379312	0.704667	0.872939
seq.10749.18	Heat shock 70 kDa protein 1A	P0DMV8	HSPA1A	baseline	0.208615	0.0786115	445.402	-2.65375	0.00824509	0.0887107
seq.10752.8	Chromodomain Y-like protein 2	Q8N8U2	CDYL2	baseline	-0.135475	0.0792572	392.562	1.70931	0.0881842	0.344749
seq.10753.31	Disintegrin and metalloproteinase domain-containing protein 7	Q9H2U9	ADAM7	baseline	0.0508001	0.154505	358.466	-0.328792	0.742505	0.893972
seq.10754.113	Prokineticin-2	Q9HC23	PROK2	baseline	0.120594	0.135048	442.937	-0.892969	0.372359	0.673556
seq.10756.34	Urocortin-3	Q969E3	UCN3	baseline	0.0138054	0.0676386	448.757	-0.204106	0.838364	0.937382
seq.10758.2	Keratocan	O60938	KERA	baseline	-0.0623404	0.0615879	435.755	1.01222	0.311996	0.621863
seq.10760.107	Glutamate receptor 4	P48058	GRIA4	baseline	-0.139623	0.0913957	445.438	1.52767	0.127304	0.407329
seq.10761.5	Transmembrane emp24 domain-containing protein 2	Q15363	TMED2	baseline	0.0671447	0.0483348	342.228	-1.38916	0.165688	0.460553
seq.10762.2	Killer cell lectin-like receptor subfamily G member 2:N-term	A4D1S0	KLRG2	baseline	-0.142905	0.0592904	441.095	2.41025	0.0163499	0.133541
seq.10767.52	G-protein coupled receptor 64	Q8IZP9	ADGRG2	baseline	-0.0788289	0.0495813	432.241	1.58989	0.11259	0.38403
seq.10772.21	Chondroitin sulfate N-acetylgalactosaminyltransferase 2	Q8N6G5	CSGALNACT2	baseline	-0.107007	0.0524177	410.515	2.04142	0.0418477	0.236735
seq.10780.10	Ras-related protein Rab-3D	O95716	RAB3D	baseline	-0.173959	0.0891781	331.811	1.95069	0.0519351	0.264681
seq.10781.19	C-type lectin domain family 4 member G	Q6UXB4	CLEC4G	baseline	0.0279562	0.0500126	454.665	-0.558983	0.576449	0.806708
seq.10785.8	Leucine-rich repeat-containing protein 52	Q8N7C0	LRRC52	baseline	-0.318656	0.139637	357.942	2.28204	0.0230735	0.165972
seq.10798.4	CMRF35-like molecule 2	Q496F6	CD300E	baseline	0.0427769	0.0937329	454	-0.456371	0.648342	0.843581
seq.10800.15	Serpin H1	P50454	SERPINH1	baseline	-0.0976871	0.133404	430.037	0.732266	0.464405	0.737134
seq.10801.11	Ephrin-A2	O43921	EFNA2	baseline	0.068239	0.0471719	402.222	-1.4466	0.148787	0.43721
seq.10803.22	Heat shock 70 kDa protein 1A	P0DMV8	HSPA1A	baseline	0.244306	0.0811994	444.709	-3.00872	0.00277255	0.0412185
seq.10809.14	Killer cell lectin-like receptor subfamily B member 1	Q12918	KLRB1	baseline	-0.0735127	0.0619325	385.504	1.18698	0.235966	0.539183
seq.10814.7	T-cell surface glycoprotein CD1a	P06126	CD1A	baseline	-0.0124431	0.0534507	405.603	0.232796	0.816037	0.926301
seq.10815.2	Intracellular hyaluronan-binding protein 4	Q5JVS0	HABP4	baseline	-0.00753756	0.038828	394.255	0.194127	0.846177	0.939839
seq.10816.150	Paired immunoglobulin-like type 2 receptor alpha isoform FDF03-M14	Q9UKJ1	PILRA	baseline	0.25868	0.235439	320.112	-1.09871	0.272719	0.581088
seq.10817.26	TOMM20-like protein 1	Q6UXN7	TOMM20L	baseline	-0.088864	0.0685905	436.437	1.29557	0.195807	0.496984
seq.10818.36	Sphingomyelin phosphodiesterase	P17405	SMPD1	baseline	-0.0017859	0.0823394	417.289	0.0216895	0.982706	0.99402
seq.10819.108	Fibulin-1	P23142	FBLN1	baseline	0.110276	0.0735706	436.337	-1.49891	0.134619	0.419944
seq.10825.12	V-set and immunoglobulin domain-containing protein 10	Q8N0Z9	VSIG10	baseline	-0.0899894	0.0686104	363.227	1.3116	0.190484	0.491479
seq.10827.67	Leucine-rich repeat and immunoglobulin-like domain-containing nogo receptor-interacting protein 3	P0C6S8	LINGO3	baseline	0.039054	0.0667451	424.76	-0.585122	0.558776	0.797532
seq.10830.5	EF-hand calcium-binding domain-containing protein 14:N-term	O75071	EFCAB14	baseline	0.0609469	0.0366596	406.088	-1.66251	0.0971828	0.361717
seq.10832.24	Beta-1,4-galactosyltransferase 6	Q9UBX8	B4GALT6	baseline	-0.0444368	0.0454679	416.632	0.977323	0.328976	0.638127
seq.10833.64	Hedgehog-interacting protein	Q96QV1	HHIP	baseline	0.114106	0.0536198	399.919	-2.12805	0.0339438	0.210168
seq.10835.25	Alpha-1,4-N-acetylglucosaminyltransferase	Q9UNA3	A4GNT	baseline	-0.194281	0.16219	352.065	1.19786	0.231777	0.534769
seq.10842.7	Beta-1,3-galactosyl-O-glycosyl-glycoprotein beta-1,6-N-acetylglucosaminyltransferase 4	Q9P109	GCNT4	baseline	0.106425	0.0627198	419.782	-1.69684	0.0904691	0.348708
seq.10847.1	Sialic acid-binding Ig-like lectin 15	Q6ZMC9	SIGLEC15	baseline	-0.0298018	0.029615	431.977	1.00631	0.314831	0.624564
seq.10848.137	Butyrophilin-like protein 3	Q6UXE8	BTNL3	baseline	0.0720836	0.0280592	447.223	-2.56898	0.010523	0.103418
seq.10851.77	Interleukin-27 subunit beta	Q14213	EBI3	baseline	0.175714	0.101952	420.135	-1.7235	0.0855333	0.339097
seq.10852.114	Heterogeneous nuclear ribonucleoprotein D-like	O14979	HNRNPDL	baseline	0.211389	0.0699029	453.981	-3.02403	0.00263568	0.0400483
seq.10854.15	Beta-1,3-galactosyl-O-glycosyl-glycoprotein beta-1,6-N-acetylglucosaminyltransferase 4	Q9P109	GCNT4	baseline	-0.0533511	0.0623521	390.151	0.855642	0.392721	0.684075
seq.10855.55	Plexin-B2	O15031	PLXNB2	baseline	0.0549811	0.137394	358.245	-0.400172	0.689268	0.865804
seq.10866.60	Serine/threonine-protein phosphatase 4 regulatory subunit 3A	Q6IN85	PPP4R3A	baseline	0.128923	0.105876	426.284	-1.21767	0.224021	0.527318
seq.10870.32	Spastin:Microtubule interacting and trafficking domain	Q9UBP0	SPAST	baseline	-0.0390225	0.076213	451.708	0.512019	0.608888	0.824375
seq.10876.300	BRCA1-associated ATM activator 1	Q6PJG6	BRAT1	baseline	0.0559495	0.0703113	404.764	-0.79574	0.42665	0.711725
seq.10880.38	Protein FAM163B	P0C2L3	FAM163B	baseline	0.0185512	0.0432674	428.274	-0.428756	0.668316	0.855394
seq.10882.12	Desmocollin-1	Q08554	DSC1	baseline	-0.0540409	0.0600144	403.194	0.900465	0.36841	0.670608
seq.10885.36	Bombesin receptor-activated protein C6orf89	Q6UWU4	C6orf89	baseline	0.0279056	0.0462744	442.547	-0.603047	0.546786	0.790854
seq.10889.2	Melanocortin-2 receptor accessory protein 2	Q96G30	MRAP2	baseline	-0.213977	0.105546	403.095	2.02733	0.043286	0.239476
seq.10890.135	Lactase-like protein	Q6UWM7	LCTL	baseline	-0.0132828	0.0496819	378.472	0.267357	0.78934	0.911785
seq.10892.8	Oncostatin-M-specific receptor subunit beta	Q99650	OSMR	baseline	0.0314256	0.0951168	378.812	-0.33039	0.741288	0.893363
seq.10894.25	Secretagogin	O76038	SCGN	baseline	-0.0370105	0.0796205	408.858	0.464836	0.642296	0.840431
seq.10895.28	Transmembrane protease serine 11B	Q86T26	TMPRSS11B	baseline	-0.0526038	0.114023	349.331	0.461342	0.644841	0.842195
seq.10900.272	Stathmin-2	Q93045	STMN2	baseline	0.271675	0.0867932	447.406	-3.13015	0.00186157	0.0309419
seq.10902.53	Retroviral-like aspartic protease 1	Q53RT3	ASPRV1	baseline	0.0116425	0.0877693	443.351	-0.132649	0.894531	0.960343
seq.10903.50	Syntaxin-8	Q9UNK0	STX8	baseline	-0.0324922	0.0880675	446.12	0.368947	0.712342	0.876985
seq.10907.116	Neurotrimin	Q9P121	NTM	baseline	0.0601839	0.0755352	427.606	-0.796766	0.426029	0.711704
seq.10908.2	Polypeptide N-acetylgalactosaminyltransferase 13	Q8IUC8	GALNT13	baseline	0.0501667	0.0579288	371.964	-0.866007	0.387045	0.679924
seq.10910.6	Carcinoembryonic antigen-related cell adhesion molecule 4	O75871	CEACAM4	baseline	-0.140388	0.0669844	383.655	2.09583	0.0367519	0.219301
seq.10916.44	Secretory phospholipase A2 receptor	Q13018	PLA2R1	baseline	-0.10424	0.0933369	416.008	1.11682	0.264718	0.570531
seq.10917.40	Guanine nucleotide-binding protein G(I)/G(S)/G(O) subunit gamma-T2	O14610	GNGT2	baseline	0.0651142	0.0537881	406.626	-1.21057	0.226765	0.529621
seq.10924.258	Neuferricin	Q8WUJ1	CYB5D2	baseline	-0.0604065	0.0670409	360.506	0.90104	0.368169	0.670577
seq.10933.107	Calcium-binding protein 8	Q9BXU9	CALN1	baseline	0.0772647	0.038289	451.138	-2.01793	0.0441896	0.241572
seq.10938.13	Lymphocyte function-associated antigen 3	P19256	CD58	baseline	0.0324838	0.0450005	416.762	-0.721855	0.470788	0.742953
seq.10939.16	Pleckstrin homology domain-containing family A member 4	Q9H4M7	PLEKHA4	baseline	0.0182168	0.0641998	353.785	-0.283751	0.776767	0.907828
seq.10940.25	Sarcalumenin	Q86TD4	SRL	baseline	0.0267869	0.0439629	425.61	-0.609306	0.542647	0.787833
seq.10945.11	Syntaxin-6	O43752	STX6	baseline	-0.0184951	0.0482644	449.895	0.383204	0.701749	0.871347
seq.10948.14	Phospholipase D3	Q8IV08	PLD3	baseline	-0.0692326	0.0725282	439.592	0.954562	0.340324	0.64646
seq.10949.59	60S acidic ribosomal protein P2	P05387	RPLP2	baseline	0.13258	0.0559492	418.1	-2.36964	0.0182584	0.142539
seq.10953.14	C-type lectin domain family 2 member A	Q6UVW9	CLEC2A	baseline	-0.0649451	0.0341456	439.803	1.902	0.0578237	0.276245
seq.10955.4	C-type lectin domain family 10 member A	Q8IUN9	CLEC10A	baseline	-0.046925	0.0410019	399.585	1.14446	0.253119	0.55811
seq.10956.82	Glycine cleavage system H protein, mitochondrial	P23434	GCSH	baseline	-0.0972614	0.0945588	357.21	1.02858	0.304373	0.614571
seq.10959.125	BET1-like protein	Q9NYM9	BET1L	baseline	0.121348	0.0497752	385.21	-2.43792	0.0152235	0.129077
seq.10961.15	Retinoic acid receptor responder protein 3	Q9UL19	PLAAT4	baseline	0.208852	0.0735313	434.355	-2.84032	0.0047187	0.0599068
seq.10966.1	Alpha-2-HS-glycoprotein	P02765	AHSG	baseline	0.00262217	0.356977	327.129	-0.0073455	0.994144	0.997954
seq.10967.12	Prolactin	P01236	PRL	baseline	0.123741	0.0921674	427.367	-1.34257	0.180123	0.479256
seq.10970.3	Ecto-ADP-ribosyltransferase 3	Q13508	ART3	baseline	0.0183182	0.0681742	414.253	-0.268697	0.788296	0.911678
seq.10974.20	Serine protease inhibitor Kazal-type 7	P58062	SPINK7	baseline	0.152477	0.0783606	404.471	-1.94583	0.0523671	0.265187
seq.10975.59	Mucin-like protein 1	Q96DR8	MUCL1	baseline	-0.138411	0.0737681	386.249	1.87631	0.0613672	0.285979
seq.10976.44	Mucin-1:region 3	P15941	MUC1	baseline	-0.0506483	0.0791053	334.226	0.640264	0.522439	0.774332
seq.10977.55	Unique cartilage matrix-associated protein	Q8WVF2	UCMA	baseline	-0.0292419	0.0682755	373.264	0.428293	0.668685	0.855394
seq.10978.39	Growth hormone variant	P01242	GH2	baseline	-0.0667627	0.103585	443.987	0.644519	0.519572	0.772849
seq.10980.11	Acetylcholinesterase	P22303	ACHE	baseline	0.0138734	0.0782021	395.447	-0.177404	0.859282	0.944948
seq.10981.56	Pro-neuregulin-3, membrane-bound isoform	P56975	NRG3	baseline	-0.0243728	0.101544	323.079	0.240022	0.810465	0.92275
seq.10990.21	Leucine-rich repeat serine/threonine-protein kinase 2	Q5S007	LRRK2	baseline	-0.0116745	0.083584	449.451	0.139673	0.888981	0.958734
seq.11067.13	Osteocalcin	P02818	BGLAP	baseline	0.0373724	0.105366	344.338	-0.354692	0.723038	0.883558
seq.11071.1	Interleukin-5	P05113	IL5	baseline	-0.0807458	0.0520407	338.889	1.55159	0.121694	0.397756
seq.11081.1	Glycerol-3-phosphate dehydrogenase [NAD(+)], cytoplasmic	P21695	GPD1	baseline	0.115369	0.130637	450.704	-0.883131	0.377636	0.676569
seq.11083.23	Gamma-enolase	P09104	ENO2	baseline	-0.051936	0.08754	420.269	0.593284	0.55331	0.794004
seq.11089.7	Immunoglobulin A	P01876|P01877	IGHA1|IGHA2	baseline	-0.0287225	0.0983887	341.275	0.291929	0.770519	0.905369
seq.11094.104	Galectin-10	Q05315	CLC	baseline	-0.0340499	0.0408929	429.912	0.832659	0.405499	0.693733
seq.11096.57	HemK methyltransferase family member 2	Q9Y5N5	N6AMT1	baseline	-0.0439126	0.0608474	449.403	0.721684	0.470864	0.742953
seq.11098.1	Pyridoxal kinase	O00764	PDXK	baseline	0.231081	0.0776123	454.544	-2.97737	0.00306261	0.0436466
seq.11101.18	Toll-like receptor 4	O00206	TLR4	baseline	-0.194496	0.0950729	383.043	2.04575	0.0414634	0.235922
seq.11102.22	Regenerating islet-derived protein 4	Q9BYZ8	REG4	baseline	-0.128697	0.0906255	445.828	1.4201	0.156279	0.448107
seq.11103.24	Heat shock protein beta-1	P04792	HSPB1	baseline	-0.00147086	0.0949258	441.176	0.0154949	0.987644	0.995112
seq.11104.13	Chitinase-3-like protein 1	P36222	CHI3L1	baseline	0.16489	0.193778	377.019	-0.850922	0.395353	0.685327
seq.11105.171	Alpha-enolase	P06733	ENO1	baseline	0.253509	0.0730797	452.704	-3.46894	0.00057251	0.0129924
seq.11107.25	Teneurin-3	Q9P273	TENM3	baseline	0.00723124	0.0311845	447.674	-0.231886	0.816733	0.926301
seq.11109.56	Sushi, von Willebrand factor type A, EGF and pentraxin domain-containing protein 1:Sushi 15-18	Q4LDE5	SVEP1	baseline	0.171484	0.0835857	417.667	-2.0516	0.0408318	0.233856
seq.11110.4	Transmembrane protein 119	Q4V9L6	TMEM119	baseline	-0.0710968	0.0365601	438.46	1.94465	0.0524557	0.265282
seq.11112.18	Protein kish-A	Q8TBQ9	TMEM167A	baseline	-0.0672052	0.0431328	377.327	1.5581	0.120048	0.395738
seq.11116.16	Uncharacterized protein C11orf87	Q6NUJ2	C11orf87	baseline	0.0324202	0.0550757	448.745	-0.588649	0.556393	0.795952
seq.11117.2	Spermatogenesis-associated protein 20	Q8TB22	SPATA20	baseline	0.0500799	0.0745826	433.734	-0.671468	0.50228	0.762069
seq.11118.107	Ras-related protein Rab-17	Q9H0T7	RAB17	baseline	-0.100681	0.0614622	448.345	1.63809	0.102104	0.369909
seq.11120.49	N-acetyltransferase 14	Q8WUY8	NAT14	baseline	0.0264839	0.0472353	427.188	-0.560679	0.57531	0.806708
seq.11121.56	Brorin	Q2TAL6	VWC2	baseline	-0.153604	0.0821881	437.425	1.86894	0.0622997	0.28926
seq.11122.97	Maspardin	Q9NZD8	SPG21	baseline	-0.0813981	0.0658441	445.534	1.23623	0.217026	0.521957
seq.11126.102	Triple functional domain protein	O75962	TRIO	baseline	-0.0494497	0.0622504	417.508	0.794368	0.427433	0.711924
seq.11128.29	Transmembrane protein 132C:Cytoplasmic domain	Q8N3T6	TMEM132C	baseline	-0.0285943	0.0790287	333.434	0.361822	0.717714	0.880452
seq.11129.66	Bone morphogenetic protein 15	O95972	BMP15	baseline	-0.0653146	0.0559789	436.862	1.16677	0.243939	0.547959
seq.11130.158	Voltage-dependent L-type calcium channel subunit beta-4	O00305	CACNB4	baseline	0.0287239	0.0729158	372.629	-0.393932	0.693857	0.867944
seq.11134.30	Peptide chain release factor 1-like, mitochondrial	Q9UGC7	MTRF1L	baseline	0.0938769	0.0418129	414.649	-2.24517	0.0252838	0.176198
seq.11135.5	39S ribosomal protein L55, mitochondrial	Q7Z7F7	MRPL55	baseline	-0.148064	0.0971449	330.505	1.52416	0.128425	0.40965
seq.11137.43	Cytokine receptor common subunit beta:Cytoplasmic domain	P32927	CSF2RB	baseline	0.0387792	0.0400667	393.528	-0.967866	0.333706	0.642379
seq.11138.16	Runt-related transcription factor 3	Q13761	RUNX3	baseline	0.0228417	0.0574386	434.179	-0.397671	0.691068	0.866939
seq.11140.56	Collagen alpha-1(I) chain:C-term propeptide	P02452	COL1A1	baseline	-0.0466975	0.0661449	429.572	0.705989	0.480578	0.745907
seq.11142.11	Angiopoietin-related protein 1:C-Term, Fibrinogen domian	O95841	ANGPTL1	baseline	0.176556	0.0722702	439.388	-2.443	0.0149585	0.127956
seq.11143.32	Noelin-3:Isoform 2, N-term	Q96PB7	OLFM3	baseline	-0.00183653	0.0456399	455.074	0.0402397	0.96792	0.989983
seq.11144.10	Beta-defensin 116	Q30KQ4	DEFB116	baseline	-0.00907554	0.0603549	427.497	0.150369	0.880544	0.953881
seq.11145.72	UPF0606 protein KIAA1549L	Q6ZVL6	KIAA1549L	baseline	-0.0533612	0.048759	411.141	1.09438	0.274427	0.582276
seq.11146.4	T-box transcription factor TBX22	Q9Y458	TBX22	baseline	-0.0182437	0.0253363	432.203	0.720063	0.471876	0.742953
seq.11147.17	Trem-like transcript 1 protein:immunoreceptor tyrosine-based inhibition motif	Q86YW5	TREML1	baseline	-0.0544141	0.0664285	393.492	0.819137	0.413204	0.701071
seq.11149.3	Toll-like receptor 1:Cytoplasmic domain	Q15399	TLR1	baseline	-0.107515	0.0422061	432.801	2.54737	0.0111986	0.107405
seq.11150.3	Collagen alpha-1(VI) chain	P12109	COL6A1	baseline	0.0389501	0.0674685	427.764	-0.577308	0.564035	0.800892
seq.11152.46	Kallikrein-13	Q9UKR3	KLK13	baseline	-0.0306153	0.0999174	405.109	0.306406	0.759453	0.900186
seq.11154.3	Nuclear factor erythroid 2-related factor 1	Q14494	NFE2L1	baseline	0.0850833	0.0982949	412.407	-0.865592	0.387217	0.680069
seq.11155.16	Collagen alpha-5(VI) chain	A8TX70	COL6A5	baseline	-0.0366196	0.0682036	318.617	0.536915	0.591701	0.815219
seq.11157.35	Heat shock 70 kDa protein 1A	P0DMV8	HSPA1A	baseline	0.0275791	0.047838	449.65	-0.576509	0.564559	0.800892
seq.11158.40	Bicaudal D-related protein 1	Q6ZP65	BICDL1	baseline	0.0986955	0.116525	390.793	-0.84699	0.397519	0.687043
seq.11159.14	Mitochondrial ubiquitin ligase activator of NFKB 1:Cytoplasmic domain	Q969V5	MUL1	baseline	-0.00909417	0.0689342	346.208	0.131925	0.89512	0.960358
seq.11160.56	RING finger protein 122	Q9H9V4	RNF122	baseline	0.00803054	0.0539989	439.307	-0.148717	0.881845	0.954974
seq.11161.5	Spartin	Q8N0X7	SPART	baseline	0.0404993	0.0566351	447.069	-0.715092	0.474925	0.743727
seq.11162.37	Equatorin	Q9NQ60	EQTN	baseline	-0.0623723	0.15182	316.288	0.410831	0.681475	0.86166
seq.11163.7	Protein FAM162B	Q5T6X4	FAM162B	baseline	-0.0305379	0.0373964	439.379	0.8166	0.4146	0.702029
seq.11164.7	Teneurin-2	Q9NT68	TENM2	baseline	0.026225	0.0538011	455.63	-0.487443	0.626179	0.834173
seq.11167.6	Myotubularin-related protein 1	Q13613	MTMR1	baseline	-0.118998	0.0546077	439.066	2.17914	0.0298524	0.194978
seq.11168.3	Multiple epidermal growth factor-like domains protein 10	Q96KG7	MEGF10	baseline	-0.130722	0.0422419	420.272	3.0946	0.00210249	0.0339077
seq.11171.25	Filamin-A:Calponin Homology 2	P21333	FLNA	baseline	-0.00692281	0.0918241	450.112	0.0753921	0.939936	0.979794
seq.11173.29	Allergin-1	Q7Z6M3	MILR1	baseline	-0.0290382	0.0406242	378.85	0.714801	0.475172	0.743727
seq.11174.8	Thrombospondin type-1 domain-containing protein 7A:Thrombospondin type-1 domain 6	Q9UPZ6	THSD7A	baseline	-0.255801	0.107653	398.835	2.37616	0.0179652	0.140893
seq.11175.45	Lysophosphatidylcholine acyltransferase 2	Q7L5N7	LPCAT2	baseline	0.000799282	0.0337199	383.078	-0.0237036	0.981101	0.993383
seq.11177.16	Keratin, type II cytoskeletal 5	P13647	KRT5	baseline	0.104154	0.075922	435.549	-1.37185	0.170815	0.46862
seq.11178.21	Sushi, von Willebrand factor type A, EGF and pentraxin domain-containing protein 1:EGF-like domains 4-6	Q4LDE5	SVEP1	baseline	0.150155	0.0924783	414.098	-1.62368	0.105205	0.375888
seq.11179.7	Testis-specific serine/threonine-protein kinase 1	Q9BXA7	TSSK1B	baseline	-0.144518	0.0842253	333.693	1.71585	0.0871181	0.342697
seq.11180.17	SWI/SNF complex subunit SMARCC1	Q92922	SMARCC1	baseline	0.0495052	0.0716044	347.264	-0.691371	0.489794	0.752372
seq.11184.51	Chromogranin-A	P10645	CHGA	baseline	-0.0729903	0.138587	453.512	0.526673	0.598678	0.818938
seq.11185.145	GTP cyclohydrolase 1	P30793	GCH1	baseline	0.188513	0.094785	406.817	-1.98885	0.0473877	0.251542
seq.11186.12	Transmembrane protein 52	Q8NDY8	TMEM52	baseline	-0.0164833	0.0559989	386.891	0.29435	0.768648	0.904937
seq.11187.11	C-type lectin domain family 12 member A	Q5QGZ9	CLEC12A	baseline	0.00201727	0.178937	329.265	-0.0112736	0.991012	0.996525
seq.11190.129	ATP-dependent zinc metalloprotease YME1L1	Q96TA2	YME1L1	baseline	-0.0513588	0.0495662	448.193	1.03617	0.300683	0.612579
seq.11192.168	Tubulointerstitial nephritis antigen-like	Q9GZM7	TINAGL1	baseline	0.238371	0.0837415	440.541	-2.84651	0.00462655	0.0589653
seq.11193.27	Hepatocyte nuclear factor 1-alpha	P20823	HNF1A	baseline	-0.165995	0.0809647	330.677	2.05021	0.0411319	0.234615
seq.11194.6	Signaling threshold-regulating transmembrane adapter 1	Q9Y3P8	SIT1	baseline	-0.158199	0.109761	347.333	1.4413	0.150401	0.440078
seq.11196.31	Collagen alpha-3(VI) chain:Bovine pancreatic trypsin inhibitor/Kunitz inhibitor domain, isoform 1	P12111	COL6A3	baseline	0.0690999	0.0532793	406.604	-1.29694	0.195389	0.496957
seq.11198.37	Cyclic AMP-responsive element-binding protein 3-like protein 1	Q96BA8	CREB3L1	baseline	-0.0946136	0.0467831	397.407	2.02239	0.0438058	0.240773
seq.11200.52	Complement component C1q receptor	Q9NPY3	CD93	baseline	-0.0260521	0.0516897	388.679	0.50401	0.61454	0.826734
seq.11201.19	tRNA pseudouridine synthase A, mitochondrial	Q9Y606	PUS1	baseline	0.01247	0.0405947	416.811	-0.307184	0.758857	0.900186
seq.11202.70	T-box transcription factor TBX5	Q99593	TBX5	baseline	-0.0660769	0.0533541	457.284	1.23846	0.216181	0.520644
seq.11203.97	Pyruvate kinase PKLR	P30613	PKLR	baseline	0.0268151	0.171738	453.415	-0.15614	0.875992	0.952073
seq.11204.80	Coxsackievirus and adenovirus receptor	P78310	CXADR	baseline	0.0801559	0.0538784	444.421	-1.48772	0.137534	0.42399
seq.11205.10	Integrin beta-7	P26010	ITGB7	baseline	-0.0500127	0.122563	441.245	0.408056	0.683431	0.862636
seq.11207.3	Macrophage scavenger receptor types I and II:Cytoplasmic domain	P21757	MSR1	baseline	-0.056337	0.0564939	341.636	0.997222	0.319362	0.629094
seq.11208.15	N-acetylglucosamine-1-phosphodiester alpha-N-acetylglucosaminidase	Q9UK23	NAGPA	baseline	-0.0669982	0.0624911	428.545	1.07212	0.284268	0.594192
seq.11211.7	Tubulin-specific chaperone E	Q15813	TBCE	baseline	-0.151222	0.100856	446.896	1.49938	0.134482	0.419689
seq.11212.7	Thioredoxin domain-containing protein 5	Q8NBS9	TXNDC5	baseline	-0.00551798	0.0549809	415.148	0.100362	0.920106	0.970981
seq.11214.40	DnaJ homolog subfamily B member 9	Q9UBS3	DNAJB9	baseline	0.166895	0.0911447	444.207	-1.8311	0.0677556	0.303013
seq.11215.6	Cadherin-15:Cytoplasmic domain	P55291	CDH15	baseline	-0.0846388	0.0842903	421.27	1.00413	0.31589	0.626011
seq.11217.16	C-terminal-binding protein 1	Q13363	CTBP1	baseline	-0.0389095	0.0696059	447.366	0.558997	0.576443	0.806708
seq.11218.84	Thiopurine S-methyltransferase	P51580	TPMT	baseline	0.00928303	0.0470203	454.844	-0.197426	0.843583	0.93888
seq.11219.95	Fibroblast growth factor-binding protein 3	Q8TAT2	FGFBP3	baseline	0.106694	0.0562023	418.007	-1.89839	0.0583339	0.277287
seq.11220.53	Uncharacterized protein C10orf105	Q8TEF2	C10orf105	baseline	0.0994851	0.0428578	445.471	-2.32128	0.020722	0.155231
seq.11223.1	Transmembrane protein 154	Q6P9G4	TMEM154	baseline	-0.0520622	0.0597299	435.848	0.871628	0.383891	0.679304
seq.11226.16	Ubiquitin-protein ligase E3A	Q05086	UBE3A	baseline	0.0542696	0.0639513	454.063	-0.848608	0.396546	0.68583
seq.11227.31	Transducin beta-like protein 2	Q9Y4P3	TBL2	baseline	-0.0521364	0.0938161	420.807	0.55573	0.578691	0.807626
seq.11228.37	Protein RIC-3	Q7Z5B4	RIC3	baseline	-0.0106088	0.0366802	434.278	0.289225	0.772547	0.906012
seq.11229.16	Serine/threonine-protein kinase/endoribonuclease IRE1	O75460	ERN1	baseline	0.0556726	0.0833942	359.354	-0.667584	0.504827	0.763726
seq.11231.12	Adrenodoxin-like protein, mitochondrial	Q6P4F2	FDX2	baseline	0.0378421	0.062911	390.946	-0.601518	0.547844	0.791446
seq.11232.46	Transcobalamin-1	P20061	TCN1	baseline	-0.137157	0.0687827	433.873	1.99406	0.0467707	0.250002
seq.11237.49	Procollagen C-endopeptidase enhancer 1	Q15113	PCOLCE	baseline	-0.164859	0.0720157	423.883	2.2892	0.0225585	0.163879
seq.11239.49	Transmembrane protease serine 6	Q8IU80	TMPRSS6	baseline	-0.26187	0.198366	360.693	1.32014	0.187626	0.487418
seq.11241.8	Argininosuccinate lyase	P04424	ASL	baseline	-0.0774431	0.11665	433.234	0.663896	0.50711	0.764577
seq.11242.33	Protein-glutamine gamma-glutamyltransferase K	P22735	TGM1	baseline	-0.0236345	0.0628167	361.585	0.376245	0.706956	0.873988
seq.11243.90	Adhesion G-protein coupled receptor F1	Q5T601	ADGRF1	baseline	0.00846721	0.0709093	454.094	-0.119409	0.905004	0.963392
seq.11245.43	Filamin-A:Calponin Homology 1	P21333	FLNA	baseline	-0.10689	0.0847286	451.867	1.26156	0.207757	0.51072
seq.11246.3	BPI fold-containing family B member 1	Q8TDL5	BPIFB1	baseline	-0.10657	0.107544	380.965	0.990947	0.32234	0.631047
seq.11247.20	N-acetylglutamate synthase, mitochondrial	Q8N159	NAGS	baseline	-0.0364918	0.0408612	368.387	0.893067	0.372404	0.673556
seq.11248.43	Uroporphyrinogen-III synthase	P10746	UROS	baseline	0.124228	0.0995785	454.548	-1.24754	0.212842	0.515709
seq.11252.30	Leucine-rich repeat and calponin homology domain-containing protein 4:Calponin Homology	O75427	LRCH4	baseline	-0.0455515	0.0474622	407.353	0.959743	0.337754	0.645073
seq.11254.13	Papilin	O95428	PAPLN	baseline	0.0246259	0.0473649	393.241	-0.519918	0.603413	0.821236
seq.11257.1	Dihydropteridine reductase	P09417	QDPR	baseline	0.09298	0.097463	452.39	-0.954003	0.340592	0.64646
seq.11258.41	Mucosal addressin cell adhesion molecule 1	Q13477	MADCAM1	baseline	-0.0210973	0.0545751	451.166	0.386573	0.699254	0.870041
seq.11260.47	SUN domain-containing protein 5	Q8TC36	SUN5	baseline	-0.00655867	0.0563082	368.219	0.116478	0.907337	0.96436
seq.11262.39	TraB domain-containing protein	Q9H4I3	TRABD	baseline	-0.0431151	0.0445272	417.298	0.968287	0.333462	0.642236
seq.11263.57	Calsequestrin-1	P31415	CASQ1	baseline	-0.0519968	0.0433429	446.778	1.19966	0.230907	0.534096
seq.11264.33	Xanthine dehydrogenase/oxidase	P47989	XDH	baseline	0.0108335	0.0488904	433.484	-0.221588	0.824739	0.931556
seq.11265.8	Retinal dehydrogenase 1	P00352	ALDH1A1	baseline	-0.00983494	0.151853	452.468	0.0647663	0.948389	0.983073
seq.11266.8	P-selectin glycoprotein ligand 1:Extracellular domain	Q14242	SELPLG	baseline	-0.138309	0.0716553	419.459	1.9302	0.0542563	0.269022
seq.11270.17	Coiled-coil-helix-coiled-coil-helix domain-containing protein 10, mitochondrial	Q8WYQ3	CHCHD10	baseline	0.104499	0.068495	421.187	-1.52564	0.127851	0.408219
seq.11273.176	Glutathione S-transferase theta-2B	P0CG30	GSTT2B	baseline	-0.0504111	0.0376409	418.408	1.33926	0.181212	0.480448
seq.11275.94	Low-density lipoprotein receptor-related protein 1B	Q9NZR2	LRP1B	baseline	0.0505492	0.0599857	378.743	-0.842688	0.399935	0.689225
seq.11277.23	Cyclic AMP-dependent transcription factor ATF-6 alpha	P18850	ATF6	baseline	0.204189	0.0741915	436.195	-2.75219	0.00616668	0.0719541
seq.11278.4	Collagen alpha-2(XI) chain	P13942	COL11A2	baseline	-0.260628	0.0857686	420.292	3.03873	0.00252408	0.0389694
seq.11279.42	Gamma-aminobutyric acid type B receptor subunit 1	Q9UBS5	GABBR1	baseline	0.188447	0.0640462	393.944	-2.94236	0.00344971	0.0478878
seq.11280.6	Glutamate decarboxylase 1	Q99259	GAD1	baseline	0.00920868	0.0531099	408.436	-0.173389	0.862431	0.946535
seq.11281.6	Growth factor receptor-bound protein 7	Q14451	GRB7	baseline	-0.025651	0.0345384	436.544	0.742681	0.458074	0.732379
seq.11282.16	Macrophage scavenger receptor types I and II:Extracellular domain	P21757	MSR1	baseline	-0.168791	0.0958404	347.642	1.76116	0.0790898	0.326084
seq.11283.13	DDB1- and CUL4-associated factor 5	Q96JK2	DCAF5	baseline	-0.0359457	0.0414228	448.64	0.867776	0.385981	0.679313
seq.11284.24	Leukocyte-associated immunoglobulin-like receptor 1	Q6GTX8	LAIR1	baseline	-0.00950487	0.0280686	417.501	0.33863	0.735059	0.890369
seq.11285.8	Hematopoietic progenitor cell antigen CD34	P28906	CD34	baseline	0.0352281	0.0452573	445.353	-0.778397	0.436748	0.717034
seq.11286.78	Selenoprotein S	Q9BQE4	SELENOS	baseline	0.0556501	0.14008	445.498	-0.397274	0.691356	0.866939
seq.11287.14	Cytochrome b5	P00167	CYB5A	baseline	0.246577	0.128756	424.26	-1.91506	0.0561564	0.273159
seq.11288.26	Cytosolic purine 5'-nucleotidase	P49902	NT5C2	baseline	-0.0664231	0.0495065	440.027	1.34171	0.180383	0.479423
seq.11289.31	Casein kinase I isoform delta	P48730	CSNK1D	baseline	-0.0293729	0.0439004	400.286	0.669082	0.503829	0.762864
seq.11292.13	Scavenger receptor class A member 3:region 2	Q6AZY7	SCARA3	baseline	-0.0931511	0.0554164	420.87	1.68093	0.0935186	0.354906
seq.11293.14	Leucine-rich repeat neuronal protein 1:Cytoplasmic domain	Q6UXK5	LRRN1	baseline	-0.0328764	0.0385253	415.775	0.853373	0.393944	0.684769
seq.11294.7	Transmembrane and coiled-coil domains protein 3:region 2	Q9ULS5	TMCC3	baseline	-0.0540104	0.0483552	446.03	1.11695	0.264616	0.570531
seq.11297.54	Neurogenic locus notch homolog protein 2	Q04721	NOTCH2	baseline	-0.11334	0.0694966	359.631	1.63088	0.103792	0.372154
seq.11300.32	Sortilin	Q99523	SORT1	baseline	-0.00874238	0.0578389	382.109	0.15115	0.879937	0.953809
seq.11302.237	Tenascin-R	Q92752	TNR	baseline	-0.104558	0.0581808	392	1.79712	0.0730864	0.314503
seq.11303.7	Deoxynucleoside triphosphate triphosphohydrolase SAMHD1	Q9Y3Z3	SAMHD1	baseline	-0.0155514	0.0609885	365.672	0.25499	0.798874	0.916377
seq.11307.33	NEDD4-like E3 ubiquitin-protein ligase WWP1	Q9H0M0	WWP1	baseline	-0.0636892	0.0726761	444.335	0.876343	0.381317	0.678583
seq.11308.8	Cyclic AMP-responsive element-binding protein 3-like protein 4	Q8TEY5	CREB3L4	baseline	-0.0255234	0.0384109	420.888	0.664482	0.506746	0.764497
seq.11310.8	Desmoglein-3	P32926	DSG3	baseline	-0.0558449	0.058272	436.999	0.958348	0.338417	0.645073
seq.11311.79	V(D)J recombination-activating protein 1	P15918	RAG1	baseline	-0.00640387	0.0325102	435.31	0.19698	0.843935	0.938906
seq.11312.40	Mismatch repair endonuclease PMS2	P54278	PMS2	baseline	-0.065805	0.0518515	412.197	1.2691	0.20512	0.507304
seq.11313.100	Pterin-4-alpha-carbinolamine dehydratase	P61457	PCBD1	baseline	0.293486	0.124452	448.548	-2.35823	0.0187907	0.145498
seq.11315.148	Protein phosphatase 1D	O15297	PPM1D	baseline	-0.0935681	0.0662042	427.648	1.41332	0.158288	0.451164
seq.11318.20	Apolipoprotein A-V	Q6Q788	APOA5	baseline	0.00157219	0.0732977	431.009	-0.0214494	0.982897	0.99402
seq.11319.106	Double-strand break repair protein MRE11	P49959	MRE11	baseline	0.0463733	0.0566727	456.162	-0.818266	0.413633	0.701351
seq.11320.29	E3 ubiquitin-protein ligase CHFR	Q96EP1	CHFR	baseline	-0.00407481	0.0617145	456.289	0.0660268	0.947385	0.982747
seq.11324.3	Peroxidasin-like protein	A1KZ92	PXDNL	baseline	-0.00961799	0.0588249	399.549	0.163502	0.870206	0.948817
seq.11325.8	Protein BTG2	P78543	BTG2	baseline	-0.00291579	0.0547161	406.404	0.0532894	0.957528	0.987084
seq.11327.56	Dual specificity protein kinase CLK2	P49760	CLK2	baseline	-0.170527	0.0756393	415.162	2.25447	0.0246872	0.173152
seq.11328.9	U6 snRNA phosphodiesterase	Q9BQ65	USB1	baseline	0.00971124	0.0394147	409.652	-0.246386	0.805507	0.920095
seq.11330.15	Casein kinase II subunit beta	P67870	CSNK2B	baseline	0.0164053	0.0514149	417.264	-0.319077	0.749827	0.895819
seq.11333.82	Rho GTPase-activating protein 25	P42331	ARHGAP25	baseline	-0.081605	0.0751723	453.06	1.08557	0.278245	0.58705
seq.11334.7	Leukocyte immunoglobulin-like receptor subfamily B member 3	O75022	LILRB3	baseline	-0.0677568	0.0596783	440.239	1.13537	0.25684	0.562028
seq.11336.9	Fanconi anemia group F protein	Q9NPI8	FANCF	baseline	-0.115596	0.0849866	417.558	1.36017	0.17451	0.472744
seq.11338.49	Tyrosine-protein kinase BLK	P51451	BLK	baseline	-0.0722662	0.0475334	411.256	1.52032	0.129198	0.41061
seq.11342.59	Plexin domain-containing protein 2:Cytoplasmic domain	Q6UX71	PLXDC2	baseline	-0.0964018	0.0601518	381.879	1.60264	0.109841	0.379941
seq.11347.9	Transaldolase	P37837	TALDO1	baseline	0.177298	0.0739664	449.562	-2.39701	0.016937	0.13643
seq.11348.132	Prolyl 4-hydroxylase subunit alpha-2	O15460	P4HA2	baseline	-0.0431778	0.0522588	380.716	0.826232	0.40919	0.696283
seq.11350.30	E3 ubiquitin-protein ligase CHIP	Q9UNE7	STUB1	baseline	-0.0489129	0.0635729	428.802	0.769398	0.44208	0.720351
seq.11351.233	Non-homologous end-joining factor 1	Q9H9Q4	NHEJ1	baseline	0.0352888	0.0648187	412.531	-0.544423	0.586445	0.812207
seq.11352.42	Titin	Q8WZ42	TTN	baseline	0.296554	0.0747419	374.554	-3.96771	8.69707e-05	0.00351399
seq.11353.143	Mothers against decapentaplegic homolog 2	Q15796	SMAD2	baseline	-0.0613594	0.0389479	447.359	1.57542	0.115866	0.389089
seq.11354.21	1-phosphatidylinositol 4,5-bisphosphate phosphodiesterase beta-1	Q9NQ66	PLCB1	baseline	-0.112941	0.095489	363.14	1.18277	0.237676	0.540373
seq.11355.10	Eukaryotic translation initiation factor 5A-2	Q9GZV4	EIF5A2	baseline	-0.145965	0.122151	446.826	1.19495	0.232739	0.536568
seq.11356.19	Protein DGCR14	Q96DF8	ESS2	baseline	0.00277131	0.0358201	432.266	-0.0773675	0.938367	0.979178
seq.11358.15	Growth factor receptor-bound protein 10	Q13322	GRB10	baseline	-0.0586745	0.125142	440.92	0.468863	0.639399	0.839232
seq.11360.39	Ribonucleoside-diphosphate reductase large subunit	P23921	RRM1	baseline	0.276181	0.149461	451.08	-1.84785	0.0652788	0.297634
seq.11361.73	Thymidine phosphorylase	P19971	TYMP	baseline	-0.00872596	0.0922093	447.782	0.0946321	0.924649	0.972572
seq.11363.58	Aquaporin-4	P55087	AQP4	baseline	-0.148271	0.0501218	441.089	2.95822	0.00326062	0.0459511
seq.11364.18	Mitofusin-1	Q8IWA4	MFN1	baseline	-0.0153716	0.0515396	396.366	0.298248	0.76567	0.90311
seq.11365.17	Teneurin-4	Q6N022	TENM4	baseline	-0.0222576	0.0396394	396.563	0.561502	0.574773	0.806708
seq.11368.32	Adenylate kinase 2, mitochondrial	P54819	AK2	baseline	0.0821671	0.080872	451.108	-1.01601	0.310167	0.620799
seq.11369.23	Alcohol dehydrogenase class-3	P11766	ADH5	baseline	-0.0236895	0.0779065	448.707	0.304076	0.761211	0.901209
seq.11370.20	72 kDa inositol polyphosphate 5-phosphatase	Q9NRR6	INPP5E	baseline	0.00942765	0.0457485	447.073	-0.206076	0.836826	0.936988
seq.11371.1	Probable G-protein coupled receptor 101	Q96P66	GPR101	baseline	-0.0219848	0.0662509	450.397	0.331842	0.740163	0.893268
seq.11372.2	Zinc finger protein 18	P17022	ZNF18	baseline	0.0043925	0.0444776	409.648	-0.0987576	0.921379	0.971111
seq.11375.49	Forkhead box protein L2	P58012	FOXL2	baseline	-0.0264713	0.0727102	326.771	0.364066	0.716044	0.879332
seq.11377.19	Alcohol dehydrogenase class 4 mu/sigma chain	P40394	ADH7	baseline	0.252043	0.0790829	393.489	-3.18707	0.00155202	0.0269158
seq.11378.37	Tyrosine-protein kinase SYK:Src Homology domain	P43405	SYK	baseline	-0.0323156	0.0918694	451.336	0.351755	0.725186	0.884396
seq.11380.84	RNA-binding protein 24	Q9BX46	RBM24	baseline	-0.0789379	0.0624432	401.594	1.26416	0.206907	0.509786
seq.11381.56	Ribose-phosphate pyrophosphokinase 1	P60891	PRPS1	baseline	-0.0547929	0.0632421	435.189	0.8664	0.386748	0.679827
seq.11382.5	Biliverdin reductase A	P53004	BLVRA	baseline	0.162719	0.10143	456.618	-1.60425	0.10935	0.379633
seq.11383.41	Keratin, type II cytoskeletal 7	P08729	KRT7	baseline	0.231755	0.0690447	413.477	-3.3566	0.000862087	0.0177946
seq.11387.3	Cyclic AMP-dependent transcription factor ATF-6 beta	Q99941	ATF6B	baseline	0.173761	0.0685534	424.91	-2.53468	0.011613	0.110681
seq.11388.75	WAP four-disulfide core domain protein 2	Q14508	WFDC2	baseline	-0.0146804	0.077073	443.398	0.190473	0.849025	0.940707
seq.11390.24	Carbonic anhydrase-related protein	P35219	CA8	baseline	0.126278	0.0570123	428.998	-2.21493	0.0272895	0.184811
seq.11391.69	Mevalonate kinase	Q03426	MVK	baseline	-0.059034	0.0762335	420.368	0.774384	0.439139	0.71893
seq.11395.5	Protein-tyrosine kinase 2-beta:4.1 protein, ezrin, radixin, moesin domain	Q14289	PTK2B	baseline	-0.0981921	0.086022	430.977	1.14148	0.254305	0.559201
seq.11396.39	Dynein intermediate chain 1, axonemal	Q9UI46	DNAI1	baseline	-0.0899755	0.043727	399.415	2.05767	0.0402708	0.232445
seq.11401.181	E3 ubiquitin-protein ligase RNF146	Q9NTX7	RNF146	baseline	-0.0880337	0.0269314	434.059	3.26881	0.00116592	0.0217601
seq.11402.17	Histone-lysine N-methyltransferase 2C	Q8NEZ4	KMT2C	baseline	-0.0458723	0.0598509	436.038	0.766443	0.443827	0.72219
seq.11405.150	Caspase recruitment domain-containing protein 9	Q9H257	CARD9	baseline	-0.0830897	0.0521291	431.787	1.59392	0.111685	0.382821
seq.11406.82	Isobutyryl-CoA dehydrogenase, mitochondrial	Q9UKU7	ACAD8	baseline	-0.0539142	0.0406199	389.285	1.32728	0.185193	0.483741
seq.11407.57	Phospholipid scramblase 3	Q9NRY6	PLSCR3	baseline	-0.145365	0.0598996	456.108	2.42681	0.0156186	0.130713
seq.11416.23	F-box/LRR-repeat protein 4:Leucine-rich repeats 4 and 5	Q9UKA2	FBXL4	baseline	0.0335429	0.0384595	452.185	-0.872162	0.383583	0.679304
seq.11421.10	EH domain-containing protein 4	Q9H223	EHD4	baseline	-0.0390603	0.0508182	449.04	0.768629	0.442518	0.720859
seq.11422.2	Homeobox protein DLX-3	O60479	DLX3	baseline	-0.116472	0.0573557	383.883	2.0307	0.0429739	0.238706
seq.11424.4	Fumarylacetoacetase	P16930	FAH	baseline	-0.038736	0.0800541	424.452	0.483873	0.628726	0.834751
seq.11425.31	RUN and FYVE domain-containing protein 1	Q96T51	RUFY1	baseline	-0.113021	0.0752603	454.657	1.50174	0.133859	0.418261
seq.11428.31	PDZ and LIM domain protein 1	O00151	PDLIM1	baseline	-0.136466	0.0879847	443.489	1.55102	0.12161	0.397653
seq.11429.80	Heterogeneous nuclear ribonucleoproteins C1/C2	P07910	HNRNPC	baseline	0.028966	0.0323582	435.16	-0.895165	0.371194	0.673556
seq.11430.49	E3 ubiquitin-protein ligase DTX1	Q86Y01	DTX1	baseline	-0.0476415	0.045088	444.058	1.05663	0.291254	0.601022
seq.11431.235	ATP-dependent DNA helicase Q1	P46063	RECQL	baseline	0.191859	0.094978	447.378	-2.02003	0.0439755	0.240883
seq.11432.11	Polyglutamine-binding protein 1	O60828	PQBP1	baseline	0.0133241	0.0360696	443.898	-0.3694	0.712006	0.876985
seq.11433.11	Tectonic-2	Q96GX1	TCTN2	baseline	-0.0385073	0.0626476	394.677	0.614665	0.53913	0.78532
seq.11436.6	Alpha-internexin	Q16352	INA	baseline	0.117076	0.0636148	439.465	-1.84039	0.0663857	0.300162
seq.11438.6	DnaJ homolog subfamily B member 2	P25686	DNAJB2	baseline	0.0762627	0.055705	454.598	-1.36905	0.171661	0.468984
seq.11439.88	Rhophilin-2	Q8IUC4	RHPN2	baseline	-0.114437	0.0464757	400.516	2.4623	0.014225	0.123914
seq.11440.58	Suppressor of cytokine signaling 3	O14543	SOCS3	baseline	-0.0808366	0.0465517	419.275	1.73649	0.0832115	0.334431
seq.11441.11	Glycogen phosphorylase, liver form	P06737	PYGL	baseline	0.0870079	0.0980751	434.085	-0.887157	0.375486	0.674897
seq.11442.1	Delta and Notch-like epidermal growth factor-related receptor:Cytoplasmic domain	Q8NFT8	DNER	baseline	-0.121874	0.0664154	355.347	1.83503	0.0673366	0.302152
seq.11444.49	DNA-directed RNA polymerase III subunit RPC6	Q9H1D9	POLR3F	baseline	0.0666144	0.0418735	394.567	-1.59085	0.112444	0.383876
seq.11448.34	Galactokinase	P51570	GALK1	baseline	-0.0192297	0.102021	456.09	0.188488	0.850578	0.941045
seq.11449.22	F-actin-capping protein subunit alpha-1	P52907	CAPZA1	baseline	0.0856245	0.103703	452.894	-0.825672	0.409425	0.696527
seq.11450.110	Protein disulfide-isomerase	P07237	P4HB	baseline	0.0714077	0.0590525	425.965	-1.20922	0.227248	0.529994
seq.11454.87	Eukaryotic translation initiation factor 3 subunit G	O75821	EIF3G	baseline	0.0428671	0.0623863	452.62	-0.687123	0.492357	0.754487
seq.11456.2	Melanoma-associated antigen B10	Q96LZ2	MAGEB10	baseline	-0.110353	0.0628491	432.351	1.75584	0.0798245	0.327578
seq.11457.53	UDP-glucose 4-epimerase	Q14376	GALE	baseline	-0.0778193	0.0675084	452.809	1.15273	0.249627	0.554598
seq.11458.30	Poly(rC)-binding protein 1	Q15365	PCBP1	baseline	-0.0404346	0.0623298	454.712	0.64872	0.516847	0.771159
seq.11459.81	RNA polymerase II elongation factor ELL	P55199	ELL	baseline	-0.0444007	0.029959	424.211	1.48205	0.13907	0.426314
seq.11462.8	RNA binding protein fox-1 homolog 2	O43251	RBFOX2	baseline	0.360523	0.0619366	419.852	-5.82084	1.16413e-08	6.31622e-06
seq.11464.9	Transcription factor RelB	Q01201	RELB	baseline	-0.11059	0.0416276	432.463	2.65665	0.00818413	0.0884404
seq.11465.4	Probable G-protein coupled receptor 135	Q8IZ08	GPR135	baseline	0.0634722	0.0963401	329.304	-0.658834	0.510463	0.767068
seq.11468.15	Probable RNA-binding protein 19	Q9Y4C8	RBM19	baseline	-0.0943721	0.127559	437.043	0.739831	0.4598	0.733748
seq.11476.43	Vacuolar protein sorting-associated protein 4A	Q9UN37	VPS4A	baseline	0.0201052	0.0934815	454.489	-0.215071	0.829808	0.93417
seq.11480.1	Aldehyde dehydrogenase, dimeric NADP-preferring	P30838	ALDH3A1	baseline	-0.00100511	0.0608123	395.508	0.016528	0.986821	0.994678
seq.11481.25	Hepatitis A virus cellular receptor 2	Q8TDQ0	HAVCR2	baseline	0.0186218	0.197755	328.99	-0.094166	0.925035	0.972572
seq.11486.26	Zinc finger protein 174	Q15697	ZNF174	baseline	-0.00272089	0.0598199	374.032	0.0454846	0.963745	0.988144
seq.11487.4	Testican-1	Q08629	SPOCK1	baseline	-0.016741	0.0607463	346.646	0.27559	0.783028	0.910099
seq.11490.42	Ubiquitin-like protein 4A	P11441	UBL4A	baseline	-0.042269	0.0763821	448.023	0.553389	0.580273	0.808523
seq.11493.169	Dynein light chain 2, cytoplasmic	Q96FJ2	DYNLL2	baseline	0.166122	0.0927592	453.744	-1.7909	0.0739763	0.316326
seq.11494.4	RNA polymerase II elongation factor ELL2	O00472	ELL2	baseline	-0.0629088	0.0640759	366.375	0.981786	0.326853	0.636001
seq.11510.31	Apolipoprotein L1	O14791	APOL1	baseline	-0.044848	0.048834	403.53	0.918375	0.358971	0.662474
seq.11510.51	Apolipoprotein L1	O14791	APOL1	baseline	-0.049877	0.0665845	386.45	0.749078	0.454266	0.728283
seq.11513.92	ADP-ribosyl cyclase/cyclic ADP-ribose hydrolase 1	P28907	CD38	baseline	0.0751042	0.0353681	388.43	-2.1235	0.0343434	0.211578
seq.11514.196	CD59 glycoprotein	P13987	CD59	baseline	-0.0158266	0.0541871	442.792	0.292074	0.770367	0.905369
seq.11516.7	Fatty acid-binding protein, liver	P07148	FABP1	baseline	-0.110001	0.0875367	446.312	1.25662	0.209548	0.512632
seq.11530.37	Porphobilinogen deaminase	P08397	HMBS	baseline	0.230113	0.156453	454.621	-1.47081	0.142033	0.430178
seq.11531.24	V-type immunoglobulin domain-containing suppressor of T-cell activation:Cytoplasmic domain	Q9H7M9	VSIR	baseline	0.151549	0.0561469	429.63	-2.69915	0.00722589	0.0804808
seq.11534.6	Leucine-rich repeat, immunoglobulin-like domain and transmembrane domain-containing protein 3	Q3SXY7	LRIT3	baseline	0.0723829	0.0516147	344.085	-1.40237	0.161707	0.456117
seq.11536.9	Histone H2A deubiquitinase MYSM1	Q5VVJ2	MYSM1	baseline	-0.0322707	0.0541457	404.882	0.595998	0.551509	0.793177
seq.11537.12	Transferrin receptor protein 2	Q9UP52	TFR2	baseline	-0.0312652	0.0436668	418.299	0.715995	0.474394	0.743727
seq.11538.216	Malonyl-CoA decarboxylase, mitochondrial	O95822	MLYCD	baseline	0.0117206	0.0596412	426.303	-0.196518	0.844298	0.938977
seq.11539.4	ATP synthase subunit f, mitochondrial	P56134	ATP5MF	baseline	-0.0870048	0.061884	428.942	1.40593	0.160468	0.45431
seq.11540.37	Forkhead box protein O3	O43524	FOXO3	baseline	0.0528166	0.0460574	448.644	-1.14676	0.252093	0.557153
seq.11542.11	Transmembrane protein 230	Q96A57	TMEM230	baseline	-0.0152924	0.03896	430.275	0.392515	0.694872	0.86799
seq.11543.84	LIM domain and actin-binding protein 1	Q9UHB6	LIMA1	baseline	-0.0992164	0.0510034	415.58	1.94529	0.0524143	0.265249
seq.11544.39	PHD finger protein 3	Q92576	PHF3	baseline	0.00374786	0.0719908	424.968	-0.0520603	0.958505	0.987084
seq.11545.9	Tumor necrosis factor receptor superfamily member 14	Q92956	TNFRSF14	baseline	-0.145025	0.0460536	446.961	3.14903	0.0017479	0.029374
seq.11546.7	Cytoglobin	Q8WWM9	CYGB	baseline	0.0272175	0.0769317	340.701	-0.353788	0.723717	0.883908
seq.11547.84	Muscle, skeletal receptor tyrosine-protein kinase	O15146	MUSK	baseline	-0.143436	0.12572	409.133	1.14092	0.254571	0.559201
seq.11548.84	M-phase inducer phosphatase 1	P30304	CDC25A	baseline	-0.0210252	0.160816	445.722	0.130741	0.896039	0.96061
seq.11549.6	Insulin gene enhancer protein ISL-1	P61371	ISL1	baseline	-0.0347003	0.0462715	384.275	0.749929	0.453757	0.727773
seq.11551.16	SWI/SNF-related matrix-associated actin-dependent regulator of chromatin subfamily E member 1-related	Q9P0W2	HMG20B	baseline	0.111618	0.0442498	418.74	-2.52245	0.0120236	0.112927
seq.11556.19	ADP-ribosylation factor GTPase-activating protein 1	Q8N6T3	ARFGAP1	baseline	-0.0639224	0.0555296	433.264	1.15114	0.250309	0.555306
seq.11557.3	E3 ubiquitin-protein ligase SMURF1	Q9HCE7	SMURF1	baseline	0.271832	0.0723805	439.138	-3.7556	0.000196212	0.00610831
seq.11560.76	Nuclear factor of activated T-cells, cytoplasmic 4	Q14934	NFATC4	baseline	-0.0359554	0.0347839	418.578	1.03368	0.301884	0.613425
seq.11562.9	DNA polymerase epsilon subunit 2	P56282	POLE2	baseline	0.0340366	0.0289848	426.626	-1.17429	0.240933	0.544356
seq.11563.51	Synaptotagmin-like protein 4:Ca2+-dependent membrane-targeting module 2	Q96C24	SYTL4	baseline	-0.0837163	0.0579582	450.441	1.44443	0.149315	0.437884
seq.11565.58	Zinc finger protein 23	P17027	ZNF23	baseline	-0.122935	0.0598802	372.159	2.05301	0.0407699	0.233856
seq.11566.48	Keratin, type II cytoskeletal 72	Q14CN4	KRT72	baseline	0.0888898	0.0583373	358.318	-1.52372	0.12846	0.40965
seq.11567.23	Zinc finger protein 10	P21506	ZNF10	baseline	0.0278908	0.0521073	450.201	-0.535257	0.592737	0.816396
seq.11568.2	Peptidyl-prolyl cis-trans isomerase FKBP1B	P68106	FKBP1B	baseline	-0.212358	0.0775018	445.163	2.74004	0.00639015	0.0736564
seq.11570.94	B-cell receptor-associated protein 29	Q9UHQ4	BCAP29	baseline	-0.116604	0.0626542	353.093	1.86107	0.0635657	0.292851
seq.11571.75	NKG2-E type II integral membrane protein:Isoform E, Extracellular domain	Q07444	KLRC3	baseline	-0.029067	0.0590043	398.704	0.492626	0.622548	0.832009
seq.11572.4	Dynamin-2	P50570	DNM2	baseline	0.063129	0.0892358	454.767	-0.70744	0.479655	0.745907
seq.11573.3	Serine/arginine-rich splicing factor 6	Q13247	SRSF6	baseline	0.398818	0.0876091	442.601	-4.55224	6.8681e-06	0.000628555
seq.11582.63	DnaJ homolog subfamily A member 2	O60884	DNAJA2	baseline	0.14587	0.0572062	436.574	-2.5499	0.0111161	0.106974
seq.11586.2	Leucine-rich repeat neuronal protein 1:Extracellular domain	Q6UXK5	LRRN1	baseline	-0.0635169	0.0435862	447.303	1.45727	0.145743	0.434655
seq.11587.5	MAX gene-associated protein	Q8IWI9	MGA	baseline	-0.104916	0.0514461	448.112	2.03934	0.0420026	0.236735
seq.11590.5	Probable RNA-binding protein 23	Q86U06	RBM23	baseline	0.100315	0.0610197	452.511	-1.64398	0.100876	0.368385
seq.11591.43	Protein regulator of cytokinesis 1	O43663	PRC1	baseline	0.122386	0.0467065	411.066	-2.62032	0.00911017	0.0953975
seq.11592.1	ELAV-like protein 1	Q15717	ELAVL1	baseline	-0.0249203	0.0574627	417.061	0.433678	0.664747	0.853952
seq.11593.21	C-X-C motif chemokine 9	Q07325	CXCL9	baseline	0.0259545	0.0340356	442.708	-0.76257	0.446126	0.722861
seq.11596.47	Zinc finger protein 75D	P51815	ZNF75D	baseline	0.0740428	0.0327283	439.602	-2.26235	0.0241633	0.171057
seq.11601.26	ATP-dependent RNA helicase DHX8	Q14562	DHX8	baseline	0.0593921	0.0333042	429.08	-1.78332	0.0752409	0.318317
seq.11602.12	Copine-1:Von Willebrand factor type A domain	Q99829	CPNE1	baseline	-0.0535977	0.0520678	440.791	1.02938	0.303865	0.614571
seq.11606.22	DnaJ homolog subfamily B member 6	O75190	DNAJB6	baseline	0.190666	0.0561953	454.895	-3.39292	0.000751964	0.0159551
seq.11607.15	Bromodomain-containing protein 1	O95696	BRD1	baseline	-0.00997501	0.0366005	397.917	0.272537	0.78535	0.910922
seq.11608.5	Microtubule-associated proteins 1A/1B light chain 3B	Q9GZQ8	MAP1LC3B	baseline	0.117454	0.0758508	452.722	-1.54849	0.122204	0.398396
seq.11614.29	Enhancer of rudimentary homolog	P84090	ERH	baseline	0.217316	0.0751219	448.918	-2.89284	0.00400336	0.0534438
seq.11615.16	Dual adapter for phosphotyrosine and 3-phosphotyrosine and 3-phosphoinositide	Q9UN19	DAPP1	baseline	-0.239525	0.0947649	450.503	2.52757	0.0118263	0.111872
seq.11616.9	Heat shock factor protein 1	Q00613	HSF1	baseline	0.186587	0.0674641	450.472	-2.76572	0.00591307	0.0696367
seq.11617.1	Integrin alpha-L	P20701	ITGAL	baseline	-0.021409	0.0371839	445.847	0.575761	0.565067	0.800943
seq.11618.83	Transcriptional activator Myb	P10242	MYB	baseline	-0.0790946	0.0377283	443.803	2.09643	0.0366098	0.219169
seq.11626.7	Ubiquitin-conjugating enzyme E2 variant 1	Q13404	UBE2V1	baseline	0.145803	0.110668	455.987	-1.31748	0.188338	0.488152
seq.11629.36	TNF receptor-associated factor 4	Q9BUZ4	TRAF4	baseline	-0.0680469	0.0775568	345.849	0.877381	0.380889	0.678207
seq.11633.89	Activator of 90 kDa heat shock protein ATPase homolog 1	O95433	AHSA1	baseline	0.0114754	0.0594222	452.297	-0.193116	0.846955	0.940132
seq.11634.32	Regulator of G-protein signaling 10	O43665	RGS10	baseline	-0.0731402	0.0822649	451.745	0.889081	0.374433	0.674778
seq.11636.33	Transgelin-2	P37802	TAGLN2	baseline	-0.0881677	0.0782403	448.134	1.12688	0.260395	0.565616
seq.11638.42	Beta-1,3-galactosyltransferase 2	O43825	B3GALT2	baseline	-0.0268332	0.0682028	440.057	0.393432	0.694191	0.867944
seq.11643.73	E3 ubiquitin-protein ligase DTX3L	Q8TDB6	DTX3L	baseline	-0.118123	0.123256	434.516	0.958357	0.338415	0.645073
seq.11645.9	Prolyl 4-hydroxylase subunit alpha-1	P13674	P4HA1	baseline	0.018206	0.0319651	441.603	-0.569558	0.569267	0.802646
seq.11646.4	Carbohydrate sulfotransferase 9	Q7L1S5	CHST9	baseline	-0.13653	0.0603341	366.683	2.26291	0.0242257	0.171305
seq.11647.6	Frizzled-10:Cytoplasmic domain	Q9ULW2	FZD10	baseline	0.00506125	0.0578648	452.416	-0.0874667	0.930339	0.975008
seq.11649.3	Stromal membrane-associated protein 1	Q8IYB5	SMAP1	baseline	-0.0803836	0.0909582	441.965	0.883742	0.377316	0.676569
seq.11651.24	Protein argonaute-1	Q9UL18	AGO1	baseline	0.0735113	0.0500454	452.928	-1.46889	0.142557	0.430431
seq.11653.69	Sodium- and chloride-dependent glycine transporter 1	P48067	SLC6A9	baseline	-0.0544828	0.0632843	396.137	0.860921	0.389802	0.681566
seq.11654.77	Neurensin-1	Q8IZ57	NRSN1	baseline	0.0158478	0.0431751	425.486	-0.367058	0.713758	0.877725
seq.11656.110	Ena/VASP-like protein	Q9UI08	EVL	baseline	-0.0581546	0.038375	448.195	1.51543	0.130369	0.412546
seq.11657.86	Suppressor of cytokine signaling 7	O14512	SOCS7	baseline	0.0511381	0.0408295	397.131	-1.25248	0.211132	0.514409
seq.11659.31	Clathrin interactor 1	Q14677	CLINT1	baseline	-0.149931	0.101569	443.968	1.47615	0.140613	0.428131
seq.11661.11	NACHT, LRR and PYD domains-containing protein 1	Q9C000	NLRP1	baseline	-0.0338926	0.0617381	379.515	0.548974	0.583346	0.810247
seq.11664.32	ADP-ribosylation factor GTPase-activating protein 2	Q8N6H7	ARFGAP2	baseline	-0.144804	0.0907533	446.599	1.59558	0.111289	0.382743
seq.11666.72	Regulator of G-protein signaling 8	P57771	RGS8	baseline	-0.0951564	0.0469822	444.662	2.02537	0.0434261	0.239901
seq.11667.29	Tensin-2	Q63HR2	TNS2	baseline	0.066883	0.0396603	428.287	-1.6864	0.0924476	0.352703
seq.11669.39	Solute carrier organic anion transporter family member 5A1	Q9H2Y9	SLCO5A1	baseline	-0.0161508	0.0615684	340.747	0.262322	0.793231	0.914057
seq.11670.18	Probable G-protein coupled receptor 101	Q96P66	GPR101	baseline	-0.178924	0.0608401	421.478	2.94088	0.0034531	0.0478878
seq.11671.19	Peregrin	P55201	BRPF1	baseline	0.00104437	0.0543371	431.03	-0.0192201	0.984674	0.994119
seq.11672.17	Kinesin-like protein KIF16B	Q96L93	KIF16B	baseline	-0.0245673	0.0429088	450.587	0.572546	0.567238	0.802226
seq.11677.17	Probable palmitoyltransferase ZDHHC14	Q8IZN3	ZDHHC14	baseline	-0.0433958	0.0485219	387.41	0.894355	0.371687	0.673556
seq.11678.105	Gap junction delta-2 protein	Q9UKL4	GJD2	baseline	-0.121696	0.0505857	410.487	2.40574	0.0165813	0.13458
seq.11681.8	Arf-GAP domain and FG repeat-containing protein 1	P52594	AGFG1	baseline	-0.00471589	0.0838481	452.618	0.0562432	0.955173	0.986605
seq.11682.7	Thioredoxin-interacting protein	Q9H3M7	TXNIP	baseline	-0.11487	0.0529606	452.601	2.16896	0.0306054	0.198022
seq.11683.19	ADP-ribosylation factor-binding protein GGA3	Q9NZ52	GGA3	baseline	-0.0317598	0.0818734	448.186	0.387914	0.698264	0.869691
seq.11690.47	Anaphase-promoting complex subunit 7	Q9UJX3	ANAPC7	baseline	-0.0205344	0.0512043	411.02	0.401029	0.688607	0.865596
seq.11692.21	SHC-transforming protein 4	Q6S5L8	SHC4	baseline	0.0250832	0.0380024	447.442	-0.660043	0.509566	0.766263
seq.11696.7	Cellular retinoic acid-binding protein 2	P29373	CRABP2	baseline	-0.103591	0.0833962	430.781	1.24215	0.214857	0.518277
seq.11699.16	Protein tyrosine phosphatase type IVA 2	Q12974	PTP4A2	baseline	-0.169502	0.0612368	447.891	2.76798	0.00587439	0.0694017
seq.11708.2	Lipocalin-1	P31025	LCN1	baseline	0.0112563	0.0478073	367.283	-0.235452	0.813989	0.925331
seq.11709.29	Carnitine O-palmitoyltransferase 1, muscle isoform	Q92523	CPT1B	baseline	-0.0640393	0.0323367	445.364	1.98039	0.0482747	0.254473
seq.11712.207	Protein unc-45 homolog A	Q9H3U1	UNC45A	baseline	0.0151385	0.0716348	446.466	-0.211329	0.832727	0.935333
seq.11715.1	POU domain, class 2, transcription factor 1	P14859	POU2F1	baseline	-0.0301782	0.0463806	412.157	0.650664	0.515626	0.769989
seq.11716.28	Leucine-rich repeat, immunoglobulin-like domain and transmembrane domain-containing protein 2	A6NDA9	LRIT2	baseline	0.00214756	0.0819049	408.853	-0.0262202	0.979095	0.993245
seq.11814.29	Hepatocyte growth factor receptor	P08581	MET	baseline	0.0573518	0.0447911	425.368	-1.28043	0.201092	0.503634
seq.11816.84	Tyrosine-protein kinase JAK2	O60674	JAK2	baseline	-0.149484	0.100931	448.617	1.48105	0.139295	0.426314
seq.11817.1	Ribosomal protein S6 kinase beta-1	P23443	RPS6KB1	baseline	-0.0318963	0.0610545	451.742	0.522424	0.601632	0.820706
seq.11825.27	Peroxisome proliferator-activated receptor gamma coactivator 1-alpha	Q9UBK2	PPARGC1A	baseline	-0.0463697	0.079759	357.496	0.581373	0.561356	0.798903
seq.11827.7	Nuclear receptor ROR-gamma	P51449	RORC	baseline	-0.0545154	0.0564345	401.596	0.965995	0.334628	0.642942
seq.11830.48	Tyrosine-protein phosphatase non-receptor type 11	Q06124	PTPN11	baseline	-0.0271663	0.082908	452.982	0.327669	0.743314	0.894005
seq.11833.83	Frataxin, mitochondrial	Q16595	FXN	baseline	0.00783248	0.0460441	453.14	-0.170108	0.865001	0.947168
seq.11836.144	Epithelial discoidin domain-containing receptor 1	Q08345	DDR1	baseline	-0.0288276	0.038157	419.206	0.7555	0.450373	0.725373
seq.11837.7	Tumor necrosis factor receptor superfamily member 18	Q9Y5U5	TNFRSF18	baseline	-0.139533	0.0583993	376.887	2.3893	0.0173715	0.138101
seq.11838.130	Piezo-type mechanosensitive ion channel component 1	Q92508	PIEZO1	baseline	-0.0336929	0.0867991	337.973	0.388171	0.698134	0.869691
seq.11851.21	Triggering receptor expressed on myeloid cells 2	Q9NZC2	TREM2	baseline	-0.0653185	0.0592818	397.775	1.10183	0.271201	0.579641
seq.11872.9	Protocadherin gamma-B1	Q9Y5G3	PCDHGB1	baseline	-0.0162491	0.0523969	436.126	0.310115	0.756622	0.899128
seq.11910.27	Homeobox protein DLX-4	Q92988	DLX4	baseline	0.0812154	0.114232	442.457	-0.710966	0.47748	0.744936
seq.11911.13	Leucine-rich repeat-containing protein 4B:Cytoplasmic domain	Q9NT99	LRRC4B	baseline	0.0654692	0.0541635	354.276	-1.20873	0.227571	0.530255
seq.11926.23	Alpha- and gamma-adaptin-binding protein p34	Q6PD74	AAGAB	baseline	-0.093146	0.0909713	443.96	1.02391	0.306438	0.61672
seq.11934.9	Integrator complex subunit 3	Q68E01	INTS3	baseline	-0.145212	0.102215	312.125	1.42066	0.156414	0.448178
seq.11949.25	Epidermal growth factor:Cytoplasmic domain	P01133	EGF	baseline	0.139267	0.0721949	346.16	-1.92904	0.054543	0.269207
seq.11952.1	Immunoglobulin superfamily DCC subclass member 3:Cytoplasmic domain	Q8IVU1	IGDCC3	baseline	0.0083405	0.0320216	421.763	-0.260465	0.794632	0.914965
seq.11955.1	Rho GTPase-activating protein 1:Rho-GTPase activating protein domain	Q07960	ARHGAP1	baseline	0.068349	0.0762351	437.566	-0.896555	0.370449	0.672707
seq.11967.23	Cellular retinoic acid-binding protein 1	P29762	CRABP1	baseline	0.00168787	0.0313729	447.28	-0.0538003	0.957118	0.987084
seq.11969.5	Protein S100-A2	P29034	S100A2	baseline	0.0150949	0.0443584	373.258	-0.340293	0.733827	0.8898
seq.11988.24	Receptor-type tyrosine-protein phosphatase H	Q9HD43	PTPRH	baseline	-0.0415653	0.0525053	378.274	0.79164	0.429067	0.712878
seq.11989.35	ER membrane protein complex subunit 1	Q8N766	EMC1	baseline	0.00575193	0.0388842	369.698	-0.147925	0.882483	0.955164
seq.12001.7	Tight junction protein ZO-1	Q07157	TJP1	baseline	-0.0208964	0.0794516	395.222	0.263008	0.792681	0.913689
seq.12008.3	T-cell antigen CD7	P09564	CD7	baseline	0.138284	0.0811787	398.901	-1.70345	0.0892623	0.346999
seq.12014.19	6-pyruvoyl tetrahydrobiopterin synthase	Q03393	PTS	baseline	-0.120797	0.096207	447.749	1.25559	0.209919	0.512715
seq.12016.60	E3 ubiquitin-protein ligase CBL	P22681	CBL	baseline	-0.0778623	0.076309	452.795	1.02035	0.308105	0.617837
seq.12018.84	Thiamin pyrophosphokinase 1	Q9H3S4	TPK1	baseline	0.0576586	0.0293381	453.896	-1.96532	0.049987	0.259182
seq.12020.39	Bisphosphoglycerate mutase	P07738	BPGM	baseline	0.282598	0.173536	455.026	-1.62846	0.104119	0.372994
seq.12022.12	Mothers against decapentaplegic homolog 4	Q13485	SMAD4	baseline	0.0544289	0.057415	454.342	-0.947992	0.343638	0.648383
seq.12030.82	Desmin	P17661	DES	baseline	-0.0581764	0.0535877	436.424	1.08563	0.278242	0.58705
seq.12033.3	Mitotic checkpoint serine/threonine-protein kinase BUB1	O43683	BUB1	baseline	0.00480368	0.0562515	359.472	-0.0853965	0.931994	0.975921
seq.12034.28	Adenylyl cyclase-associated protein 1	Q01518	CAP1	baseline	-0.186756	0.131446	452.679	1.42079	0.156067	0.447874
seq.12041.33	Heat shock 70 kDa protein 1-like	P34931	HSPA1L	baseline	0.170635	0.212626	425.558	-0.802514	0.422704	0.709428
seq.12046.51	TAR DNA-binding protein 43	Q13148	TARDBP	baseline	0.0152433	0.0440331	384.493	-0.346179	0.729398	0.88719
seq.12077.32	Growth/differentiation factor 8	O14793	MSTN	baseline	-0.0899557	0.0514023	424.488	1.75003	0.080835	0.329411
seq.12329.21	Ribosomal protein S6 kinase alpha-1	Q15418	RPS6KA1	baseline	-0.135008	0.0577977	407.604	2.33588	0.0199818	0.151479
seq.12332.7	Eukaryotic elongation factor 2 kinase	O00418	EEF2K	baseline	-0.193845	0.102417	439.893	1.8927	0.0590536	0.279658
seq.12333.87	Ribose-5-phosphate isomerase	P49247	RPIA	baseline	0.182419	0.0830739	446.538	-2.19586	0.0286154	0.189988
seq.12334.25	Serine hydroxymethyltransferase, cytosolic	P34896	SHMT1	baseline	-0.276462	0.15441	449.455	1.79044	0.0740561	0.316326
seq.12338.27	Pikachurin	Q63HQ2	EGFLAM	baseline	-0.0176171	0.0930228	427.339	0.189385	0.849881	0.940797
seq.12340.17	Alanine--tRNA ligase, cytoplasmic	P49588	AARS1	baseline	-0.056487	0.0836995	448.446	0.674878	0.500101	0.75998
seq.12341.8	Dual specificity protein phosphatase 6	Q16828	DUSP6	baseline	-0.0159614	0.0665294	453.794	0.239916	0.810504	0.92275
seq.12343.14	Arf-GAP with coiled-coil, ANK repeat and PH domain-containing protein 2	Q15057	ACAP2	baseline	-0.0443639	0.0515662	446.219	0.860329	0.39007	0.681769
seq.12345.4	Anaphase-promoting complex subunit 10	Q9UM13	ANAPC10	baseline	0.118003	0.0319455	439.238	-3.69389	0.000248698	0.00718294
seq.12347.29	Cerebral cavernous malformations 2 protein	Q9BSQ5	CCM2	baseline	-0.122255	0.0619539	440.752	1.97333	0.0490827	0.256595
seq.12348.46	Serine--tRNA ligase, mitochondrial	Q9NP81	SARS2	baseline	-0.0272411	0.0691921	433.743	0.393703	0.693994	0.867944
seq.12350.86	Protein C-ets-2	P15036	ETS2	baseline	-0.065213	0.0401821	384.032	1.62294	0.105423	0.37623
seq.12351.25	Signal transducer and activator of transcription 1-alpha/beta	P42224	STAT1	baseline	-0.125614	0.0793222	442.461	1.5836	0.114	0.386175
seq.12352.70	Arrestin domain-containing protein 3	Q96B67	ARRDC3	baseline	-0.149236	0.107409	383.5	1.38943	0.165509	0.460348
seq.12355.223	Ribosome-recycling factor, mitochondrial	Q96E11	MRRF	baseline	-0.0492097	0.0384275	428.929	1.28059	0.201031	0.503634
seq.12356.65	Sorcin	P30626	SRI	baseline	0.119484	0.120764	454.453	-0.989396	0.322996	0.631363
seq.12357.41	Synaptosomal-associated protein 29	O95721	SNAP29	baseline	0.00492505	0.0635756	337.067	-0.0774676	0.938298	0.979178
seq.12358.6	Immunoglobulin-binding protein 1	P78318	IGBP1	baseline	0.15756	0.102859	455.5	-1.5318	0.126266	0.405203
seq.12361.102	Ras-related protein R-Ras2	P62070	RRAS2	baseline	0.0139813	0.043361	411.804	-0.32244	0.747283	0.895322
seq.12363.70	Tribbles homolog 2	Q92519	TRIB2	baseline	-0.0353442	0.0357609	394.182	0.988346	0.32359	0.631711
seq.12365.108	RuvB-like 1	Q9Y265	RUVBL1	baseline	-0.0265428	0.0373393	449.708	0.710854	0.477543	0.744936
seq.12366.16	Gamma-crystallin D	P07320	CRYGD	baseline	-0.0486864	0.0321363	399.368	1.515	0.130564	0.412546
seq.12367.52	Macoilin	Q8N5G2	MACO1	baseline	-0.0430273	0.06205	427.381	0.69343	0.488416	0.751728
seq.12368.18	Histone acetyltransferase KAT2B	Q92831	KAT2B	baseline	0.135291	0.0518138	444.174	-2.6111	0.00933055	0.096956
seq.12370.30	Apolipoprotein F	Q13790	APOF	baseline	0.23659	0.118077	441.168	-2.0037	0.0457137	0.245747
seq.12372.50	Tropomyosin alpha-3 chain	P06753	TPM3	baseline	0.177819	0.076643	391.571	-2.32009	0.0208491	0.155722
seq.12373.73	Transformer-2 protein homolog beta	P62995	TRA2B	baseline	0.169407	0.0866067	450.666	-1.95605	0.0510771	0.261973
seq.12374.8	Platelet-activating factor acetylhydrolase IB subunit gamma	Q15102	PAFAH1B3	baseline	0.177768	0.165848	455.239	-1.07187	0.284346	0.594192
seq.12376.85	Cyclin-dependent kinase 4 inhibitor D	P55273	CDKN2D	baseline	-0.0867927	0.0733336	446.506	1.18353	0.237228	0.54
seq.12378.71	Tapasin	O15533	TAPBP	baseline	-0.0357523	0.080695	393.828	0.443055	0.65797	0.850134
seq.12381.26	Carbonyl reductase [NADPH] 1	P16152	CBR1	baseline	0.108832	0.0830306	450.708	-1.31074	0.190613	0.491645
seq.12382.2	Probable ATP-dependent RNA helicase DDX58	O95786	DDX58	baseline	-0.0744724	0.0839031	422.883	0.8876	0.37526	0.674897
seq.12384.92	COP9 signalosome complex subunit 7b	Q9H9Q2	COPS7B	baseline	0.0391244	0.0854872	409.204	-0.457664	0.647437	0.843297
seq.12385.4	Calpain-3	P20807	CAPN3	baseline	0.0305028	0.0651476	356.319	-0.468211	0.63992	0.839232
seq.12386.11	Aminopeptidase B	Q9H4A4	RNPEP	baseline	0.20252	0.0772592	440.538	-2.6213	0.00906253	0.0950815
seq.12387.7	PDZ and LIM domain protein 4	P50479	PDLIM4	baseline	-0.0204778	0.0975439	412.77	0.209934	0.833823	0.936051
seq.12389.4	Origin recognition complex subunit 6	Q9Y5N6	ORC6	baseline	0.0666943	0.0340181	427.653	-1.96055	0.0505798	0.260356
seq.12391.27	PDZ domain-containing protein 7	Q9H5P4	PDZD7	baseline	-0.151322	0.0576696	432.135	2.62394	0.00899956	0.0946823
seq.12392.30	ADP-ribosylation factor-like protein 1	P40616	ARL1	baseline	0.0036472	0.049893	441.512	-0.0731005	0.941759	0.980886
seq.12394.53	Transmembrane protein C16orf54	Q6UWD8	C16orf54	baseline	0.0208309	0.104644	390.852	-0.199065	0.842315	0.93834
seq.12395.86	Aspartate--tRNA ligase, mitochondrial	Q6PI48	DARS2	baseline	-0.117013	0.158928	445.047	0.736263	0.461959	0.735492
seq.12396.19	3-hydroxyisobutyryl-CoA hydrolase, mitochondrial	Q6NVY1	HIBCH	baseline	0.138406	0.138167	436.518	-1.00173	0.317027	0.626683
seq.12398.15	Paired box protein Pax-4	O43316	PAX4	baseline	0.0744457	0.0709547	407.208	-1.0492	0.294708	0.606174
seq.12399.194	Coiled-coil domain-containing protein 50	Q8IVM0	CCDC50	baseline	0.0321016	0.0732502	423.692	-0.438246	0.661431	0.852371
seq.12400.25	Ubiquitin-conjugating enzyme E2 T	Q9NPD8	UBE2T	baseline	-0.0382848	0.0368171	441.229	1.03987	0.298972	0.61085
seq.12401.3	AMSH-like protease	Q96FJ0	STAMBPL1	baseline	0.005834	0.0373207	430.55	-0.156321	0.875854	0.952058
seq.12403.30	Ras-related protein Rab-39B	Q96DA2	RAB39B	baseline	-0.00266982	0.0359252	423.798	0.0743159	0.940794	0.98015
seq.12406.119	GTP-binding protein Di-Ras3	O95661	DIRAS3	baseline	-0.115656	0.070919	354.197	1.63082	0.103817	0.372154
seq.12408.333	Ras-related protein Rab-22A	Q9UL26	RAB22A	baseline	-0.104262	0.0496693	380.869	2.09912	0.0364645	0.218787
seq.12409.90	Ras-related protein Rab-7b	Q96AH8	RAB7B	baseline	0.0184475	0.0661758	394.214	-0.278764	0.780572	0.90939
seq.12411.60	Protein max	P61244	MAX	baseline	0.212705	0.0804413	454.269	-2.64423	0.00847108	0.0903741
seq.12414.31	14-3-3 protein beta/alpha	P31946	YWHAB	baseline	0.307668	0.0606158	451.516	-5.0757	5.65344e-07	0.000107359
seq.12415.122	Endothelial differentiation-related factor 1	O60869	EDF1	baseline	-0.0517357	0.0454654	443.102	1.13791	0.255771	0.560703
seq.12417.46	EKC/KEOPS complex subunit TPRKB	Q9Y3C4	TPRKB	baseline	0.0781168	0.0487345	445.374	-1.60291	0.109664	0.379808
seq.12420.10	Glycerol-3-phosphate dehydrogenase 1-like protein	Q8N335	GPD1L	baseline	-0.171505	0.0740302	435.916	2.31669	0.0209835	0.156418
seq.12422.143	Arachidonate 15-lipoxygenase B	O15296	ALOX15B	baseline	0.286934	0.139771	420.475	-2.05289	0.0407011	0.233856
seq.12423.38	APOBEC1 complementation factor	Q9NQ94	A1CF	baseline	0.122611	0.082228	365.28	-1.49111	0.136797	0.422745
seq.12424.107	Thymocyte nuclear protein 1	Q9P016	THYN1	baseline	0.00638146	0.055022	449.258	-0.11598	0.90772	0.96436
seq.12425.104	ADP-ribosylation factor 6	P62330	ARF6	baseline	-0.0540872	0.0312735	405.095	1.72949	0.0844835	0.337106
seq.12426.19	MOB kinase activator 1A	Q9H8S9	MOB1A	baseline	-0.0922544	0.0484863	439.696	1.90269	0.0577342	0.276164
seq.12427.8	M-phase inducer phosphatase 2	P30305	CDC25B	baseline	0.0204924	0.0362298	445.157	-0.565622	0.571936	0.804225
seq.12428.2	Lysophospholipase-like protein 1	Q5VWZ2	LYPLAL1	baseline	-0.00185249	0.0336124	394.72	0.0551132	0.956076	0.987084
seq.12430.78	Polyadenylate-binding protein-interacting protein 1	Q9H074	PAIP1	baseline	0.000737613	0.0394575	390.704	-0.0186939	0.985095	0.994119
seq.12431.13	Protein pelota homolog	Q9BRX2	PELO	baseline	-0.11828	0.091924	336.336	1.28671	0.199079	0.500897
seq.12432.23	Calcyclin-binding protein	Q9HB71	CACYBP	baseline	-0.0929363	0.097725	441.25	0.950998	0.342126	0.647915
seq.12433.8	ADP-ribosylation factor-like protein 11	Q969Q4	ARL11	baseline	-0.0128954	0.0371307	444.263	0.347296	0.728533	0.886281
seq.12434.25	IST1 homolog	P53990	IST1	baseline	-0.0410132	0.0727587	451.296	0.563688	0.573246	0.805752
seq.12436.84	Glutathione S-transferase omega-1	P78417	GSTO1	baseline	0.0936768	0.0663143	448.524	-1.41262	0.158461	0.45132
seq.12437.18	Serine/threonine-protein kinase ULK3	Q6PHR2	ULK3	baseline	0.0246328	0.0353188	410.158	-0.697441	0.485922	0.750064
seq.12438.127	DNA-3-methyladenine glycosylase	P29372	MPG	baseline	0.0316542	0.0839204	451.497	-0.377192	0.706208	0.873673
seq.12439.67	Interferon regulatory factor 9	Q00978	IRF9	baseline	-0.0035111	0.036323	444.576	0.0966633	0.923037	0.972078
seq.12442.4	Rho-related GTP-binding protein RhoD	O00212	RHOD	baseline	-0.0614996	0.0702367	404.913	0.875605	0.381764	0.678678
seq.12444.39	Nuclear receptor subfamily 5 group A member 2	O00482	NR5A2	baseline	-0.0095883	0.0591695	396.124	0.162048	0.871351	0.949153
seq.12445.50	Ankyrin repeat domain-containing protein 27	Q96NW4	ANKRD27	baseline	-0.0742425	0.0317256	418.115	2.34015	0.0197458	0.15029
seq.12446.49	Glutathione S-transferase A1	P08263	GSTA1	baseline	-0.304908	0.170594	450.588	1.78734	0.0745551	0.31671
seq.12448.246	Glycylpeptide N-tetradecanoyltransferase 1	P30419	NMT1	baseline	-0.0768974	0.0876253	447.956	0.87757	0.380647	0.678207
seq.12449.16	Peptidyl-prolyl cis-trans isomerase H	O43447	PPIH	baseline	0.0464053	0.0954577	452.462	-0.486135	0.627107	0.834259
seq.12450.42	Phosphomevalonate kinase	Q15126	PMVK	baseline	-0.0608739	0.0583405	421.492	1.04342	0.29735	0.609072
seq.12451.62	Transcription regulator protein BACH1	O14867	BACH1	baseline	-0.0320443	0.0465409	434.165	0.688518	0.491494	0.753916
seq.12452.32	Histone-lysine N-methyltransferase SUV420H2	Q86Y97	KMT5C	baseline	-0.0269845	0.0446066	402.617	0.604944	0.545557	0.789945
seq.12453.161	Nuclear RNA export factor 1	Q9UBU9	NXF1	baseline	0.049128	0.0594644	453.034	-0.826175	0.40914	0.696283
seq.12454.105	N-terminal Xaa-Pro-Lys N-methyltransferase 1	Q9BV86	NTMT1	baseline	-0.0336317	0.0441675	376.721	0.761458	0.44686	0.723139
seq.12455.48	Myoneurin	Q9NPC7	MYNN	baseline	-0.0482658	0.0337103	426.632	1.43178	0.152938	0.442391
seq.12456.5	6-phosphofructo-2-kinase/fructose-2,6-bisphosphatase 3	Q16875	PFKFB3	baseline	-0.152254	0.0850905	426.443	1.78932	0.0742735	0.316423
seq.12457.10	1,2-dihydroxy-3-keto-5-methylthiopentene dioxygenase	Q9BV57	ADI1	baseline	0.0737181	0.0645508	403.18	-1.14202	0.254124	0.559201
seq.12458.79	Calcineurin B homologous protein 1	Q99653	CHP1	baseline	0.273347	0.0653689	359.294	-4.18161	3.64081e-05	0.001931
seq.12459.13	Pleckstrin homology domain-containing family A member 1	Q9HB21	PLEKHA1	baseline	-0.0163804	0.042968	439.15	0.381223	0.703222	0.872253
seq.12460.18	Proteasome subunit alpha type-7	O14818	PSMA7	baseline	0.140372	0.122971	452.293	-1.14151	0.254263	0.559201
seq.12461.8	NAD-dependent protein deacylase sirtuin-5, mitochondrial	Q9NXA8	SIRT5	baseline	0.0843218	0.0515482	432.306	-1.63579	0.102612	0.370106
seq.12462.20	Histone-lysine N-methyltransferase SETMAR	Q53H47	SETMAR	baseline	0.0548008	0.0526423	387.045	-1.041	0.298525	0.610292
seq.12463.7	Kelch-like protein 13	Q9P2N7	KLHL13	baseline	0.0854822	0.0660522	359.553	-1.29416	0.196441	0.497478
seq.12466.7	Heterogeneous nuclear ribonucleoprotein A1	P09651	HNRNPA1	baseline	0.343705	0.0786491	455.673	-4.37011	1.53942e-05	0.00109285
seq.12469.19	Microtubule-associated protein RP/EB family member 1	Q15691	MAPRE1	baseline	-0.0125935	0.0880285	449.755	0.143062	0.886305	0.95765
seq.12471.47	Double-stranded RNA-binding protein Staufen homolog 1	O95793	STAU1	baseline	0.0388989	0.0497368	445.915	-0.782093	0.434575	0.715806
seq.12473.48	BTB/POZ domain-containing protein KCTD5	Q9NXV2	KCTD5	baseline	-0.0580499	0.0335489	438.887	1.73031	0.0842787	0.33676
seq.12475.48	Chloride intracellular channel protein 5	Q9NZA1	CLIC5	baseline	0.581711	0.108244	451.614	-5.37405	1.2361e-07	3.84397e-05
seq.12476.50	Fructose-2,6-bisphosphatase TIGAR	Q9NQ88	TIGAR	baseline	0.000958065	0.0422634	372.884	-0.0226689	0.981927	0.993926
seq.12477.42	Translin	Q15631	TSN	baseline	0.169911	0.11061	449.455	-1.53612	0.125213	0.403529
seq.12478.15	60S ribosomal protein L30	P62888	RPL30	baseline	0.0505835	0.104066	437.702	-0.486073	0.627159	0.834259
seq.12479.50	cAMP-dependent protein kinase type I-beta regulatory subunit	P31321	PRKAR1B	baseline	-0.0212561	0.0800847	397.129	0.26542	0.790823	0.912378
seq.12480.9	OTU domain-containing protein 5	Q96G74	OTUD5	baseline	-0.0884253	0.0598956	449.201	1.47632	0.140558	0.428131
seq.12482.5	Nucleosome-remodeling factor subunit BPTF	Q12830	BPTF	baseline	-0.0324693	0.0371033	353.597	0.875104	0.382111	0.678743
seq.12483.62	Nuclear receptor ROR-beta	Q92753	RORB	baseline	0.0585702	0.0749267	391.088	-0.781701	0.434863	0.715943
seq.12484.67	Phosphatidylinositol transfer protein beta isoform	P48739	PITPNB	baseline	-0.0736436	0.0455142	440.496	1.61804	0.10637	0.37686
seq.12486.8	Glutaredoxin-2, mitochondrial	Q9NS18	GLRX2	baseline	0.101361	0.0361816	429.238	-2.80146	0.00531724	0.06525
seq.12488.9	Malignant T-cell-amplified sequence 1	Q9ULC4	MCTS1	baseline	-0.0830997	0.0921657	426.688	0.901634	0.36776	0.670387
seq.12490.92	Ragulator complex protein LAMTOR3	Q9UHA4	LAMTOR3	baseline	0.0163786	0.0534076	451.663	-0.306672	0.759234	0.900186
seq.12491.23	Chloride intracellular channel protein 4	Q9Y696	CLIC4	baseline	0.0315982	0.0894542	449.301	-0.353233	0.724079	0.883908
seq.12493.42	Ubiquitin thioesterase OTUB2	Q96DC9	OTUB2	baseline	0.0388819	0.0443213	435.788	-0.877274	0.380821	0.678207
seq.12494.99	Gamma-aminobutyric acid receptor-associated protein-like 2	P60520	GABARAPL2	baseline	0.247716	0.0911717	454.224	-2.71703	0.00683865	0.0769577
seq.12497.29	Tudor-interacting repair regulator protein	Q9BRJ7	NUDT16L1	baseline	0.0503918	0.0795351	427.765	-0.63358	0.526694	0.777451
seq.12498.12	Tax1-binding protein 3	O14907	TAX1BP3	baseline	0.0331243	0.060144	431.1	-0.55075	0.582091	0.809661
seq.12499.108	Endophilin-A1	Q99962	SH3GL2	baseline	-0.125981	0.103431	449.399	1.21802	0.223856	0.527318
seq.12500.88	SUMO-activating enzyme subunit 2	Q9UBT2	UBA2	baseline	0.0254953	0.0782858	445.107	-0.325669	0.744828	0.894358
seq.12501.10	Tubulin-specific chaperone A	O75347	TBCA	baseline	0.134817	0.0837427	395.378	-1.6099	0.108218	0.378733
seq.12503.5	Ovarian cancer G-protein coupled receptor 1	Q15743	GPR68	baseline	-0.0613144	0.058978	441.199	1.03962	0.299088	0.610882
seq.12504.26	Leiomodin-1	P29536	LMOD1	baseline	0.0852613	0.0666406	388.572	-1.27942	0.201513	0.504014
seq.12507.16	Inositol-trisphosphate 3-kinase C	Q96DU7	ITPKC	baseline	-0.0536691	0.0388774	379.247	1.38047	0.168255	0.46492
seq.12508.9	Charged multivesicular body protein 3	Q9Y3E7	CHMP3	baseline	0.0908232	0.0672279	452.606	-1.35097	0.177379	0.474927
seq.12509.115	COMM domain-containing protein 1	Q8N668	COMMD1	baseline	-0.100726	0.165127	354.493	0.609993	0.542257	0.787569
seq.12510.3	Signal-transducing adaptor protein 1	Q9ULZ2	STAP1	baseline	-0.0685528	0.0338607	412.015	2.02455	0.0435578	0.240279
seq.12511.83	Solute carrier family 41 member 2	Q96JW4	SLC41A2	baseline	-0.122503	0.0637975	417.453	1.92018	0.0555163	0.271209
seq.12513.8	Glycolipid transfer protein	Q9NZD2	GLTP	baseline	-0.0358667	0.0424316	355.864	0.845284	0.39852	0.688303
seq.12514.16	tRNA (guanine-N(7)-)-methyltransferase	Q9UBP6	METTL1	baseline	0.00331138	0.0373865	412.396	-0.0885715	0.929465	0.97463
seq.12515.45	Uridine-cytidine kinase 2	Q9BZX2	UCK2	baseline	-0.155859	0.0685667	345.2	2.2731	0.023634	0.168543
seq.12516.13	Transcriptional enhancer factor TEF-3	Q15561	TEAD4	baseline	-0.0296141	0.0670015	356.969	0.441991	0.658763	0.85087
seq.12517.52	Programmed cell death protein 5	O14737	PDCD5	baseline	0.24269	0.0809167	452.313	-2.99926	0.00285571	0.0419574
seq.12518.289	Protein polybromo-1	Q86U86	PBRM1	baseline	0.146047	0.0598812	453.114	-2.43894	0.0151132	0.128555
seq.12521.3	Cyclin-dependent kinase 4 inhibitor C	P42773	CDKN2C	baseline	-0.0992947	0.0370303	439.823	2.68144	0.00760627	0.0838566
seq.12522.6	UV excision repair protein RAD23 homolog B	P54727	RAD23B	baseline	0.230068	0.0726169	450.819	-3.16824	0.0016379	0.0280214
seq.12524.18	Diamine acetyltransferase 2	Q96F10	SAT2	baseline	-0.108894	0.0576186	380.62	1.88992	0.0595289	0.280336
seq.12527.50	Thyroid hormone receptor alpha	P10827	THRA	baseline	-0.0537006	0.0521275	446.052	1.03018	0.303484	0.614558
seq.12528.40	ATPase WRNIP1	Q96S55	WRNIP1	baseline	-0.0983006	0.0440523	430.867	2.23145	0.026165	0.179577
seq.12529.32	Inactive peptidyl-prolyl cis-trans isomerase FKBP6	O75344	FKBP6	baseline	-0.138366	0.0969204	415.219	1.42763	0.154151	0.444715
seq.12530.14	Cyclin-dependent kinases regulatory subunit 1	P61024	CKS1B	baseline	-0.0127138	0.0496103	446.55	0.256272	0.797858	0.91627
seq.12531.5	Endogenous retrovirus group V member 1 Env polyprotein	B6SEH8	ERVV-1	baseline	-0.0391238	0.0502604	430.456	0.778422	0.436748	0.717034
seq.12532.28	Ubiquitin-conjugating enzyme E2 R1	P49427	CDC34	baseline	0.0045307	0.091117	386.686	-0.049724	0.960368	0.988072
seq.12533.135	Cytohesin-2	Q99418	CYTH2	baseline	-0.077811	0.0342063	427.557	2.27476	0.0234149	0.167951
seq.12534.10	Calcium-binding and coiled-coil domain-containing protein 2	Q13137	CALCOCO2	baseline	-0.0620946	0.0351021	440.796	1.76897	0.0775905	0.323656
seq.12535.2	DNA repair protein XRCC1	P18887	XRCC1	baseline	0.0193051	0.0765841	368.276	-0.252077	0.801122	0.917956
seq.12536.46	Myotubularin-related protein 6	Q9Y217	MTMR6	baseline	0.0665959	0.0687143	447.557	-0.969171	0.332983	0.641639
seq.12537.88	Transcriptional activator protein Pur-alpha	Q00577	PURA	baseline	0.137937	0.0650119	455.865	-2.12173	0.0343996	0.211578
seq.12538.19	Regulator of G-protein signaling 7	P49802	RGS7	baseline	-0.142303	0.0575825	427.032	2.47128	0.0138521	0.121924
seq.12540.25	Rho-related GTP-binding protein RhoG	P84095	RHOG	baseline	0.0313334	0.0327137	455.183	-0.957806	0.338669	0.645229
seq.12543.76	Zinc finger protein 560	Q96MR9	ZNF560	baseline	-0.0600646	0.0691024	394.187	0.869211	0.38526	0.679304
seq.12546.1	Smoothelin	P53814	SMTN	baseline	-0.0652693	0.112091	435.906	0.582287	0.560674	0.798903
seq.12548.75	Ras-related GTP-binding protein C	Q9HB90	RRAGC	baseline	-0.0654963	0.0679179	361.046	0.964346	0.335518	0.643585
seq.12549.33	Hematopoietic prostaglandin D synthase	O60760	HPGDS	baseline	-0.184404	0.075637	416.16	2.43801	0.0151858	0.129028
seq.12551.3	E3 ubiquitin-protein ligase Itchy homolog	Q96J02	ITCH	baseline	-0.249042	0.167593	388.312	1.48599	0.138092	0.425192
seq.12553.5	Serine/threonine-protein kinase VRK1	Q99986	VRK1	baseline	0.00761039	0.0421107	438.6	-0.180723	0.856668	0.943627
seq.12554.10	DNA repair protein RAD51 homolog 4	O75771	RAD51D	baseline	-0.150947	0.0540099	423.255	2.7948	0.00542939	0.0664116
seq.12556.7	Ubiquitin-conjugating enzyme E2 C	O00762	UBE2C	baseline	-0.0737219	0.0728489	332.702	1.01198	0.312281	0.622106
seq.12557.18	RNA-binding protein Nova-1	P51513	NOVA1	baseline	0.00276411	0.10245	337.536	-0.0269802	0.978491	0.993245
seq.12558.3	Ubiquitin-associated and SH3 domain-containing protein B	Q8TF42	UBASH3B	baseline	-0.131422	0.130966	442.253	1.00349	0.316174	0.626243
seq.12560.9	5'(3')-deoxyribonucleotidase, cytosolic type	Q8TCD5	NT5C	baseline	0.09392	0.0780095	445.898	-1.20396	0.229245	0.532053
seq.12562.1	Serine/threonine-protein kinase N1	Q16512	PKN1	baseline	-0.0298284	0.0265628	441.133	1.12294	0.262075	0.567917
seq.12563.2	Tumor necrosis factor alpha-induced protein 8	O95379	TNFAIP8	baseline	-0.0170118	0.0707988	448.172	0.240284	0.81022	0.922704
seq.12564.9	60S ribosome subunit biogenesis protein NIP7 homolog	Q9Y221	NIP7	baseline	-0.0397707	0.0942406	413.405	0.422012	0.673235	0.857946
seq.12568.14	Kelch-like ECH-associated protein 1	Q14145	KEAP1	baseline	0.0211246	0.0450174	426.889	-0.469254	0.639128	0.839232
seq.12569.25	T-complex protein 1 subunit epsilon	P48643	CCT5	baseline	-0.10374	0.147582	450.522	0.702931	0.482462	0.747478
seq.12571.14	ADP-ribosylation factor-like protein 3	P36405	ARL3	baseline	0.00929921	0.0748277	451.398	-0.124275	0.901153	0.962438
seq.12572.236	Embryonal Fyn-associated substrate	O43281	EFS	baseline	0.0463561	0.0409741	411.081	-1.13135	0.258567	0.56439
seq.12573.80	Tripartite motif-containing protein 3	O75382	TRIM3	baseline	-0.0610461	0.0893106	438.755	0.683526	0.494635	0.756248
seq.12574.36	Endothelin-2	P20800	EDN2	baseline	0.0607029	0.0893338	398.829	-0.679507	0.497211	0.757843
seq.12575.30	C-1-tetrahydrofolate synthase, cytoplasmic	P11586	MTHFD1	baseline	-0.0739005	0.112203	448.569	0.658632	0.51047	0.767068
seq.12576.21	Melanoma-associated antigen 3	P43357	MAGEA3	baseline	-0.039699	0.0334839	443.572	1.18562	0.236409	0.539591
seq.12577.100	Flap endonuclease 1	P39748	FEN1	baseline	-0.0512794	0.0574532	349.525	0.892542	0.372717	0.673603
seq.12578.13	ADP-ribosylation factor 3	P61204	ARF3	baseline	-0.0294787	0.0895447	419.884	0.329206	0.742164	0.893703
seq.12580.7	Proteasome subunit beta type-5	P28074	PSMB5	baseline	-0.0775147	0.0436564	444.61	1.77557	0.0764885	0.321353
seq.12581.39	Inositol monophosphatase 2	O14732	IMPA2	baseline	-0.0956141	0.0535314	425.681	1.78613	0.07479	0.317075
seq.12583.77	Serine/threonine-protein kinase A-Raf	P10398	ARAF	baseline	-0.0645965	0.0760014	413.233	0.849938	0.395852	0.685587
seq.12585.39	DNA excision repair protein ERCC-1	P07992	ERCC1	baseline	0.0233144	0.0423117	366.924	-0.551015	0.581959	0.809661
seq.12587.65	ADP-ribosylation factor-like protein 2	P36404	ARL2	baseline	-0.0871652	0.0486519	447.722	1.79161	0.073871	0.316304
seq.12591.27	Oligophrenin-1	O60890	OPHN1	baseline	-0.130618	0.123236	440.587	1.0599	0.289771	0.599756
seq.12593.33	p53 and DNA damage-regulated protein 1	Q9NUG6	PDRG1	baseline	0.00522812	0.0718483	438.415	-0.0727661	0.942025	0.981029
seq.12594.5	Grancalcin	P28676	GCA	baseline	0.184032	0.0970583	444.878	-1.89609	0.0585952	0.278007
seq.12595.11	Tropomodulin-1	P28289	TMOD1	baseline	0.350107	0.157621	455.792	-2.22119	0.0268286	0.183181
seq.12597.68	Autophagy protein 5	Q9H1Y0	ATG5	baseline	-0.127357	0.0845088	422.739	1.50702	0.132552	0.415544
seq.12599.10	Fermitin family homolog 3	Q86UX7	FERMT3	baseline	-0.17014	0.0777614	446.025	2.18798	0.0291893	0.192048
seq.12603.87	Polyadenylate-binding protein 4	Q13310	PABPC4	baseline	0.143707	0.0664701	444.86	-2.16198	0.031152	0.200026
seq.12604.16	Polycomb protein SCMH1	Q96GD3	SCMH1	baseline	-0.0373201	0.0866525	347.262	0.430687	0.666963	0.854922
seq.12605.1	Exosome complex component RRP40	Q9NQT5	EXOSC3	baseline	-0.190135	0.150101	336.141	1.26671	0.206135	0.508614
seq.12612.37	Proteasome subunit beta type-1	P20618	PSMB1	baseline	0.0464587	0.0817403	451.282	-0.56837	0.570067	0.803033
seq.12616.45	Nuclear receptor-binding protein	Q9UHY1	NRBP1	baseline	-0.0941975	0.0660041	442.153	1.42715	0.154243	0.444811
seq.12617.2	Serine/threonine-protein kinase 24	Q9Y6E0	STK24	baseline	-0.111982	0.0921347	452.788	1.21542	0.22484	0.527777
seq.12618.50	Aldo-keto reductase family 1 member C1	Q04828	AKR1C1	baseline	-0.0835532	0.0503862	448.295	1.65826	0.0979655	0.363305
seq.12619.14	Protein phosphatase 1A	P35813	PPM1A	baseline	0.042069	0.0511778	415.46	-0.822015	0.41154	0.699654
seq.12620.3	Septin-11	Q9NVA2	SEPTIN11	baseline	-0.00997481	0.0495358	450.747	0.201366	0.840504	0.937513
seq.12621.55	Serine/threonine-protein phosphatase 2A 65 kDa regulatory subunit A alpha isoform	P30153	PPP2R1A	baseline	0.0307901	0.0973244	453.549	-0.316366	0.75187	0.897097
seq.12622.96	Histone-lysine N-methyltransferase ASH1L	Q9NR48	ASH1L	baseline	-0.0192411	0.0598865	382.013	0.321293	0.748164	0.895322
seq.12623.84	Protein Jumonji	Q92833	JARID2	baseline	-0.0920156	0.0441777	435.433	2.08285	0.037848	0.224079
seq.12625.138	Kelch-like protein 7	Q8IXQ5	KLHL7	baseline	-0.0150433	0.0406988	438.468	0.369624	0.711841	0.876929
seq.12626.6	Sentrin-specific protease 7	Q9BQF6	SENP7	baseline	-0.0949211	0.032338	439.938	2.93528	0.00350702	0.0485233
seq.12627.97	Ubiquitin-like modifier-activating enzyme ATG7	O95352	ATG7	baseline	0.285944	0.155156	453.484	-1.84295	0.0659895	0.299426
seq.12628.31	LanC-like protein 2	Q9NS86	LANCL2	baseline	0.128002	0.129466	454.771	-0.988689	0.323341	0.631571
seq.12630.8	Arfaptin-2	P53365	ARFIP2	baseline	-0.143168	0.0606809	373.049	2.35936	0.018821	0.145585
seq.12632.14	Arylamine N-acetyltransferase 1	P18440	NAT1	baseline	-0.0196084	0.0662144	456.709	0.296136	0.767261	0.904285
seq.12633.3	Tyrosine-protein phosphatase non-receptor type 9	P43378	PTPN9	baseline	-0.0996167	0.0524162	373.835	1.90049	0.0581375	0.276699
seq.12634.79	Breast cancer anti-estrogen resistance protein 3:Guanine Nucleotide Exchange Factor Domain	O75815	BCAR3	baseline	-0.115359	0.0652148	408.531	1.76891	0.0776545	0.323745
seq.12635.9	tRNA (cytosine(38)-C(5))-methyltransferase	O14717	TRDMT1	baseline	0.0155563	0.036205	425.665	-0.429671	0.667652	0.855081
seq.12636.113	N-lysine methyltransferase SMYD2	Q9NRG4	SMYD2	baseline	0.0253017	0.034552	384.173	-0.732279	0.464445	0.737134
seq.12637.7	Carnitine O-acetyltransferase	P43155	CRAT	baseline	-0.0525105	0.101074	440.366	0.519528	0.603654	0.821236
seq.12641.3	Type II inositol 1,4,5-trisphosphate 5-phosphatase	P32019	INPP5B	baseline	-0.191566	0.135742	447.184	1.41125	0.158867	0.452053
seq.12643.4	Beta-arrestin-1	P49407	ARRB1	baseline	0.0803905	0.108465	452.685	-0.741166	0.458977	0.733316
seq.12644.63	Adenylosuccinate synthetase isozyme 2	P30520	ADSS2	baseline	0.237396	0.0721772	432.198	-3.28907	0.00108741	0.0207017
seq.12646.2	Ribulose-phosphate 3-epimerase	Q96AT9	RPE	baseline	0.0934806	0.117112	453.461	-0.798213	0.425165	0.711076
seq.12647.52	Histone-lysine N-methyltransferase SETD2	Q9BYW2	SETD2	baseline	0.069641	0.0500883	375.252	-1.39036	0.165242	0.459773
seq.12649.80	Malate dehydrogenase, mitochondrial	P40926	MDH2	baseline	0.0320001	0.0911363	448.717	-0.351124	0.72566	0.884541
seq.12650.43	Guanine nucleotide-binding protein G(k) subunit alpha	P08754	GNAI3	baseline	-0.0105507	0.0729537	418.514	0.144622	0.885079	0.957155
seq.12651.21	[Pyruvate dehydrogenase (acetyl-transferring)] kinase isozyme 2, mitochondrial	Q15119	PDK2	baseline	-0.0465324	0.0388357	391.426	1.19819	0.231569	0.534692
seq.12652.37	Adenosylhomocysteinase 2	O43865	AHCYL1	baseline	-0.108128	0.0747122	444.22	1.44727	0.148527	0.436954
seq.12653.13	Casein kinase I isoform gamma-2	P78368	CSNK1G2	baseline	-0.00863904	0.0434533	405.153	0.198812	0.84251	0.93834
seq.12655.30	Beta-soluble NSF attachment protein	Q9H115	NAPB	baseline	0.000352077	0.0312475	429.478	-0.0112674	0.991015	0.996525
seq.12656.1	Kinesin light chain 1	Q07866	KLC1	baseline	-0.0792886	0.146099	451.668	0.542704	0.587601	0.813009
seq.12657.2	GDP-L-fucose synthase	Q13630	TSTA3	baseline	0.0447021	0.0836358	431.686	-0.534486	0.593281	0.816648
seq.12658.72	Pantothenate kinase 3	Q9H999	PANK3	baseline	0.0676593	0.0957862	460	-0.706357	0.480324	0.745907
seq.12659.13	Obg-like ATPase 1	Q9NTK5	OLA1	baseline	0.177915	0.103799	455.595	-1.71404	0.0872011	0.342847
seq.12661.44	Gamma-aminobutyric acid receptor-associated protein-like 1	Q9H0R8	GABARAPL1	baseline	0.333433	0.0605028	450.431	-5.51104	6.01375e-08	2.5378e-05
seq.12662.82	Delta(3,5)-Delta(2,4)-dienoyl-CoA isomerase, mitochondrial	Q13011	ECH1	baseline	-0.033631	0.153028	451.647	0.219771	0.826149	0.932187
seq.12663.1	Thiosulfate sulfurtransferase	Q16762	TST	baseline	-0.0316958	0.098779	386.562	0.320876	0.748478	0.895322
seq.12664.19	Tyrosine-protein phosphatase non-receptor type 13	Q12923	PTPN13	baseline	0.0380757	0.0788827	335.856	-0.482687	0.629632	0.835404
seq.12665.16	Interleukin enhancer-binding factor 2	Q12905	ILF2	baseline	-0.00237698	0.0475985	375.422	0.0499381	0.960198	0.988034
seq.12667.2	Guanine deaminase	Q9Y2T3	GDA	baseline	-0.0478791	0.0626925	444.903	0.763713	0.445443	0.72219
seq.12668.7	Vacuolar protein sorting-associated protein 4B	O75351	VPS4B	baseline	-0.0880597	0.0446915	452.102	1.97039	0.0494033	0.257918
seq.12669.30	E3 ubiquitin-protein ligase HECW1	Q76N89	HECW1	baseline	0.013079	0.0211314	434.529	-0.618937	0.536282	0.783683
seq.12670.15	Cell cycle checkpoint protein RAD1	O60671	RAD1	baseline	0.0655371	0.0469792	437.981	-1.39502	0.163716	0.458598
seq.12671.35	Sulfotransferase family cytosolic 1B member 1	O43704	SULT1B1	baseline	-0.0968464	0.0550393	448.472	1.75959	0.0791599	0.326084
seq.12675.14	Aspartate--tRNA ligase, cytoplasmic	P14868	DARS1	baseline	-0.107618	0.0889211	450.134	1.21027	0.226811	0.529621
seq.12676.1	Protein kinase C and casein kinase substrate in neurons protein 1	Q9BY11	PACSIN1	baseline	0.0531354	0.0402932	391.542	-1.31872	0.188034	0.487809
seq.12677.164	Protein flightless-1 homolog	Q13045	FLII	baseline	-0.0322332	0.0999063	448.139	0.322634	0.747123	0.895322
seq.12678.66	U1 small nuclear ribonucleoprotein A	P09012	SNRPA	baseline	0.137943	0.0836325	455.277	-1.64939	0.0997568	0.365887
seq.12681.63	Ubiquitin carboxyl-terminal hydrolase 21	Q9UK80	USP21	baseline	-0.014746	0.0494349	450.247	0.29829	0.765619	0.90311
seq.12682.5	Kynurenine--oxoglutarate transaminase 3	Q6YP21	KYAT3	baseline	-0.000585805	0.070756	373.193	0.00827922	0.993399	0.99739
seq.12683.156	Dihydropyrimidinase-related protein 5	Q9BPU6	DPYSL5	baseline	-0.0801925	0.0434893	423.672	1.84396	0.0658875	0.299341
seq.12684.5	Adseverin	Q9Y6U3	SCIN	baseline	0.247573	0.0758521	417.454	-3.26389	0.00118941	0.0220898
seq.12685.57	Homer protein homolog 2	Q9NSB8	HOMER2	baseline	-0.0951348	0.0847862	425.781	1.12205	0.262471	0.568177
seq.12686.15	3-mercaptopyruvate sulfurtransferase	P25325	MPST	baseline	0.0555207	0.0330194	451.618	-1.68146	0.0933653	0.354906
seq.12687.2	2,4-dienoyl-CoA reductase, mitochondrial	Q16698	DECR1	baseline	-0.0834032	0.132471	445.572	0.629595	0.529283	0.778871
seq.12688.115	Ribosomal protein S6 kinase alpha-6	Q9UK32	RPS6KA6	baseline	-0.00994135	0.0667773	451.048	0.148873	0.88172	0.954974
seq.12689.56	Actin-related protein 2/3 complex subunit 1B	O15143	ARPC1B	baseline	-0.0693976	0.0977547	453.989	0.709916	0.478121	0.74522
seq.12690.33	Septin-10	Q9P0V9	SEPTIN10	baseline	-0.0421675	0.0439053	395.684	0.96042	0.33743	0.645073
seq.12691.44	Serine hydroxymethyltransferase, mitochondrial	P34897	SHMT2	baseline	-0.123502	0.128568	443.26	0.960595	0.337279	0.645073
seq.12692.56	Histone-lysine N-methyltransferase, H3 lysine-79 specific	Q8TEK3	DOT1L	baseline	0.167578	0.0692936	376.388	-2.41838	0.0160639	0.132344
seq.12693.2	SH3 domain-binding glutamic acid-rich-like protein	O75368	SH3BGRL	baseline	-0.0494381	0.0597344	450.041	0.827633	0.408317	0.695733
seq.12694.28	Probable dimethyladenosine transferase	Q9UNQ2	DIMT1	baseline	0.0920257	0.0893664	452.945	-1.02976	0.303674	0.614558
seq.12695.62	Kelch-like protein 12	Q53G59	KLHL12	baseline	0.0666112	0.0449233	356.442	-1.48278	0.139018	0.426314
seq.12696.166	Protein arginine N-methyltransferase 3	O60678	PRMT3	baseline	-0.0113683	0.0795071	358.683	0.142984	0.886383	0.95765
seq.12697.30	Phosphatidylinositol 5-phosphate 4-kinase type-2 alpha	P48426	PIP4K2A	baseline	0.118876	0.131105	453.675	-0.906727	0.365032	0.667286
seq.12698.72	Importin subunit alpha-3	O00629	KPNA4	baseline	-0.0144578	0.0494604	443.115	0.29231	0.770186	0.905369
seq.12699.28	T-complex protein 1 subunit theta	P50990	CCT8	baseline	-0.0563911	0.152124	450.049	0.370692	0.711041	0.87669
seq.12700.9	ATP-citrate synthase	P53396	ACLY	baseline	-0.0120453	0.0227314	439.835	0.529899	0.596449	0.818349
seq.12701.1	Eukaryotic translation initiation factor 1b	O60739	EIF1B	baseline	0.0964081	0.0928307	454.581	-1.03854	0.299572	0.611708
seq.12702.13	E3 ubiquitin-protein ligase pellino homolog 2	Q9HAT8	PELI2	baseline	-0.0785226	0.0796216	355.769	0.986198	0.324706	0.632753
seq.12703.6	Serine/threonine-protein kinase Nek7	Q8TDX7	NEK7	baseline	-0.107277	0.114015	449.375	0.940897	0.347263	0.6526
seq.12704.26	SH2 domain-containing protein 3C	Q8N5H7	SH2D3C	baseline	0.00137986	0.0457715	432.438	-0.0301467	0.975964	0.993245
seq.12705.9	Probable E3 ubiquitin-protein ligase HERC1	Q15751	HERC1	baseline	-0.0545113	0.0535018	362.108	1.01887	0.308946	0.618707
seq.12706.2	Serine/threonine-protein kinase MRCK alpha	Q5VT25	CDC42BPA	baseline	0.147335	0.109659	453.828	-1.34357	0.17976	0.478939
seq.12707.26	Dihydropyrimidinase-related protein 3	Q14195	DPYSL3	baseline	0.189389	0.0569953	452.802	-3.32288	0.000963187	0.018916
seq.12708.91	Lethal(3)malignant brain tumor-like protein 2	Q969R5	L3MBTL2	baseline	0.178801	0.0728567	456.236	-2.45415	0.0144946	0.125543
seq.12709.63	Histone H1x	Q92522	H1-10	baseline	0.0686022	0.144764	453.529	-0.47389	0.635807	0.838034
seq.12711.19	Gap junction alpha-8 protein	P48165	GJA8	baseline	0.0149824	0.0677004	337.665	-0.221304	0.82499	0.931562
seq.12712.9	High mobility group protein 20A	Q9NP66	HMG20A	baseline	0.112358	0.0352025	433.662	-3.19175	0.00151696	0.0266732
seq.12713.365	Regulator of G-protein signaling 19	P49795	RGS19	baseline	-0.0801233	0.042301	436.375	1.89412	0.0588696	0.27896
seq.12714.38	AP-1 complex subunit gamma-like 2	O75843	AP1G2	baseline	-0.0953662	0.0811279	444.267	1.1755	0.240422	0.54385
seq.12715.30	mRNA-decapping enzyme 1B	Q8IZD4	DCP1B	baseline	-0.0363131	0.166125	452.356	0.21859	0.827068	0.932689
seq.12716.3	Zinc finger protein 175	Q9Y473	ZNF175	baseline	-0.0369988	0.0452223	445.807	0.818155	0.413706	0.701351
seq.12717.65	TOX high mobility group box family member 3	O15405	TOX3	baseline	0.129858	0.0527537	440.413	-2.4616	0.0142143	0.123914
seq.12718.43	Peptidyl-prolyl cis-trans isomerase NIMA-interacting 4	Q9Y237	PIN4	baseline	0.0917709	0.0865748	452.892	-1.06002	0.289701	0.599756
seq.12720.71	Ubiquilin-4	Q9NRR5	UBQLN4	baseline	0.279846	0.0738213	449.324	-3.79085	0.000170613	0.00558611
seq.12721.4	Tax1-binding protein 1	Q86VP1	TAX1BP1	baseline	-0.0215471	0.0357728	424.629	0.602332	0.547274	0.790854
seq.12724.81	Cold-inducible RNA-binding protein	Q14011	CIRBP	baseline	0.150839	0.0900287	451.029	-1.67545	0.0945391	0.357451
seq.12726.3	Regulatory factor X-associated protein	O00287	RFXAP	baseline	0.0888012	0.0410703	379.422	-2.16217	0.0312292	0.200352
seq.12727.7	Prostaglandin F2 receptor negative regulator	Q9P2B2	PTGFRN	baseline	-0.0586951	0.0478499	420.201	1.22665	0.220641	0.525058
seq.12729.12	Proteasome assembly chaperone 3	Q9BT73	PSMG3	baseline	0.259788	0.0860441	449.282	-3.01924	0.00267838	0.0405225
seq.12730.3	Kinetochore protein NDC80 homolog	O14777	NDC80	baseline	-0.00697317	0.0407789	455.657	0.170999	0.8643	0.946806
seq.12731.12	Pleckstrin homology domain-containing family A member 7	Q6IQ23	PLEKHA7	baseline	0.111703	0.074618	434.414	-1.49699	0.135121	0.420777
seq.12732.13	MAGUK p55 subfamily member 7	Q5T2T1	MPP7	baseline	-0.00688177	0.036212	390.445	0.190041	0.849375	0.940778
seq.12734.112	Kinesin-like protein KIF22	Q14807	KIF22	baseline	0.0696872	0.0506845	396.608	-1.37492	0.169931	0.46836
seq.12735.39	Cold shock domain-containing protein E1	O75534	CSDE1	baseline	-0.0918111	0.0527712	434.328	1.7398	0.0826031	0.332866
seq.12737.12	Plastin-1	Q14651	PLS1	baseline	0.2471	0.100749	370.866	-2.45262	0.0146418	0.126242
seq.12738.43	Nischarin	Q9Y2I1	NISCH	baseline	-0.0392228	0.045194	451.237	0.867875	0.385924	0.679313
seq.12740.55	Protein FEV	Q99581	FEV	baseline	0.0342396	0.0563398	449.474	-0.607733	0.543672	0.788718
seq.12742.160	Transmembrane protein 8B	A6NDV4	TMEM8B	baseline	0.0136513	0.15203	360.101	-0.0897932	0.928501	0.974292
seq.12743.18	BAG family molecular chaperone regulator 5	Q9UL15	BAG5	baseline	-0.0392188	0.0472333	335.318	0.830321	0.406948	0.694334
seq.12746.4	Cytohesin-4	Q9UIA0	CYTH4	baseline	0.0646174	0.0444371	454.011	-1.45413	0.146601	0.435285
seq.12747.89	RNA-binding protein 3	P98179	RBM3	baseline	0.164222	0.0891519	449.653	-1.84204	0.0661269	0.299509
seq.12748.6	Bromodomain testis-specific protein	Q58F21	BRDT	baseline	-0.0349526	0.0448485	430.801	0.779347	0.436203	0.717034
seq.12750.9	Integrin beta-2	P05107	ITGB2	baseline	-0.0845918	0.0517596	443.645	1.63432	0.102901	0.370794
seq.12751.26	Zinc fingers and homeoboxes protein 1	Q9UKY1	ZHX1	baseline	0.0976584	0.0537494	348.26	-1.81692	0.0700887	0.30792
seq.12753.6	Amyloid beta A4 precursor protein-binding family B member 2:Phosphotyrosine Interaction Domain 1	Q92870	APBB2	baseline	0.134428	0.0368481	448.998	-3.64817	0.000295115	0.00809276
seq.12754.14	Cold shock domain-containing protein C2	Q9Y534	CSDC2	baseline	-0.079271	0.0651496	394.116	1.21675	0.224426	0.527318
seq.12756.3	Transcription regulator protein BACH2	Q9BYV9	BACH2	baseline	-0.128249	0.0966004	384.758	1.32763	0.185089	0.483741
seq.12758.47	Glutamate receptor ionotropic, delta-2	O43424	GRID2	baseline	-0.150618	0.0834653	376.462	1.80456	0.0719429	0.31151
seq.12759.47	Interleukin enhancer-binding factor 3	Q12906	ILF3	baseline	0.194473	0.0426626	425.805	-4.55839	6.74524e-06	0.000628555
seq.12760.34	Zinc finger protein 774	Q6NX45	ZNF774	baseline	-0.0105718	0.037315	392.732	0.283313	0.777086	0.907828
seq.12761.12	Amyloid beta A4 precursor protein-binding family B member 2:Phosphotyrosine Interaction Domain 2	Q92870	APBB2	baseline	0.00278857	0.0753823	358.546	-0.0369924	0.970512	0.991356
seq.12763.69	Zinc finger protein 334	Q9HCZ1	ZNF334	baseline	-0.124599	0.0457909	397.891	2.72104	0.00679338	0.0766754
seq.12764.3	Engulfment and cell motility protein 1	Q92556	ELMO1	baseline	-0.103045	0.0952767	350.41	1.08153	0.280204	0.589089
seq.12766.33	Probable G-protein coupled receptor 142	Q7Z601	GPR142	baseline	-0.062923	0.0976497	338.367	0.644375	0.519769	0.772849
seq.12768.3	Protein phosphatase 1 regulatory subunit 3B	Q86XI6	PPP1R3B	baseline	-0.32938	0.109272	331.853	3.01432	0.00277396	0.0412185
seq.12771.19	Zinc finger protein 180	Q9UJW8	ZNF180	baseline	0.0162947	0.0717504	343.067	-0.227103	0.820479	0.928678
seq.12772.8	Nuclear pore complex protein Nup98-Nup96	P52948	NUP98	baseline	0.126935	0.0867731	375.257	-1.46284	0.144348	0.432324
seq.12774.12	Potassium/sodium hyperpolarization-activated cyclic nucleotide-gated channel 1	O60741	HCN1	baseline	-0.0637228	0.0788046	357.194	0.808618	0.419273	0.706321
seq.12775.6	High mobility group protein B3	O15347	HMGB3	baseline	-0.0310914	0.0877244	448.171	0.354422	0.72319	0.883601
seq.12777.11	Splicing factor 1	Q15637	SF1	baseline	0.128493	0.0331959	418.655	-3.87076	0.000125822	0.0045296
seq.12779.30	PR domain zinc finger protein 4	Q9UKN5	PRDM4	baseline	-0.0886972	0.0451559	401.568	1.96424	0.0501913	0.259709
seq.12781.2	RISC-loading complex subunit TARBP2	Q15633	TARBP2	baseline	0.0296258	0.0391799	439.762	-0.756149	0.449965	0.725373
seq.12783.29	Heterogeneous nuclear ribonucleoprotein M	P52272	HNRNPM	baseline	0.0117099	0.0817792	453.83	-0.143189	0.886204	0.95765
seq.12784.10	Amyloid beta A4 precursor protein-binding family B member 3:Phosphotyrosine Interaction Domain 1,Isoform II	O95704	APBB3	baseline	-0.0491733	0.0747592	397.065	0.657755	0.511077	0.767676
seq.12785.49	Transcriptional regulator Kaiso	Q86T24	ZBTB33	baseline	0.157398	0.052733	429.889	-2.98482	0.0029994	0.0431505
seq.12786.61	Glycerophosphocholine phosphodiesterase GPCPD1	Q9NPB8	GPCPD1	baseline	0.0930142	0.0791766	389.187	-1.17477	0.240805	0.544356
seq.12787.47	Zinc finger protein 134	P52741	ZNF134	baseline	-0.079251	0.0503157	358.938	1.57508	0.11612	0.389414
seq.12788.6	SAGA-associated factor 29 homolog	Q96ES7	SGF29	baseline	0.0171899	0.0530466	393.113	-0.324054	0.74607	0.894934
seq.12790.10	Coiled-coil domain-containing protein 51	Q96ER9	CCDC51	baseline	0.0696049	0.0481865	382.399	-1.44449	0.14942	0.437884
seq.12793.4	Piwi-like protein 1	Q96J94	PIWIL1	baseline	-0.103959	0.0659382	372.568	1.57661	0.115734	0.388989
seq.12794.6	NACHT, LRR and PYD domains-containing protein 4	Q96MN2	NLRP4	baseline	0.00735475	0.0364875	430.575	-0.201569	0.840349	0.937513
seq.12795.2	Zinc finger protein 566	Q969W8	ZNF566	baseline	-0.0324704	0.0371179	433.671	0.87479	0.382173	0.678743
seq.12796.44	Diphosphoinositol polyphosphate phosphohydrolase 1	O95989	NUDT3	baseline	0.0503409	0.0527103	357.342	-0.95505	0.340198	0.64646
seq.12798.46	Electroneutral sodium bicarbonate exchanger 1	Q2Y0W8	SLC4A8	baseline	-0.0806155	0.0606895	416.939	1.32833	0.184797	0.48354
seq.12799.65	DnaJ homolog subfamily C member 27	Q9NZQ0	DNAJC27	baseline	-0.0365805	0.0558909	395.069	0.654498	0.513172	0.768428
seq.12800.5	Tubulin polymerization-promoting protein family member 2	P59282	TPPP2	baseline	0.486049	0.103621	423.671	-4.69063	3.68032e-06	0.000409207
seq.12801.33	Interferon regulatory factor 2	P14316	IRF2	baseline	0.0838624	0.0919813	419.289	-0.911733	0.362433	0.664986
seq.12803.9	Zinc finger protein 329	Q86UD4	ZNF329	baseline	0.0962475	0.0434669	434.993	-2.21427	0.027328	0.184811
seq.12804.5	Glucocorticoid modulatory element-binding protein 2	Q9UKD1	GMEB2	baseline	0.115576	0.0732593	454.986	-1.57763	0.115345	0.388712
seq.12807.89	Rho GTPase-activating protein 30	Q7Z6I6	ARHGAP30	baseline	0.0427934	0.0359436	449.182	-1.19057	0.234451	0.53817
seq.12808.103	Calcium-regulated heat-stable protein 1	Q9Y2V2	CARHSP1	baseline	0.0796821	0.077133	453.333	-1.03305	0.302132	0.613425
seq.12811.55	Zinc finger protein 415	Q09FC8	ZNF415	baseline	-0.0104971	0.0371037	422.921	0.282912	0.777383	0.907828
seq.12812.25	Acylphosphatase-2	P14621	ACYP2	baseline	0.173825	0.0672859	448.797	-2.58337	0.0100993	0.101105
seq.12813.18	EH domain-binding protein 1	Q8NDI1	EHBP1	baseline	-0.0559734	0.0364463	392.698	1.53578	0.125398	0.403954
seq.12814.17	RNA-binding protein 40	Q96LT9	RNPC3	baseline	-0.0230619	0.0749859	434.388	0.30755	0.758572	0.900186
seq.12815.9	Isoleucine--tRNA ligase, cytoplasmic	P41252	IARS1	baseline	-0.0220688	0.0529078	345.984	0.417118	0.676851	0.859321
seq.12817.1	GTP-binding protein GEM	P55040	GEM	baseline	-0.17396	0.114893	419.857	1.51411	0.13075	0.412546
seq.12818.159	Urea transporter 2	Q15849	SLC14A2	baseline	0.0569079	0.0515813	435.815	-1.10327	0.270521	0.578919
seq.12820.1	GRB2-related adapter protein	Q13588	GRAP	baseline	-0.0232774	0.0369722	430.625	0.629591	0.529296	0.778871
seq.12821.6	NACHT, LRR and PYD domains-containing protein 10	Q86W26	NLRP10	baseline	0.0074666	0.0627204	390.266	-0.119046	0.9053	0.963392
seq.12822.34	Amyloid beta A4 precursor protein-binding family B member 1:Phosphotyrosine Interaction Domain 1	O00213	APBB1	baseline	0.0526919	0.0618643	444.92	-0.851733	0.394821	0.685222
seq.12825.18	DCC-interacting protein 13-alpha	Q9UKG1	APPL1	baseline	-0.0992658	0.0622415	359.645	1.59485	0.111624	0.382821
seq.12826.5	Sodium/iodide cotransporter	Q92911	SLC5A5	baseline	0.0474925	0.168095	379.861	-0.282534	0.777688	0.907828
seq.12827.37	Regulator of G-protein signaling 3	P49796	RGS3	baseline	-0.0160592	0.0500038	440.342	0.321159	0.748242	0.895322
seq.12830.4	Histone deacetylase complex subunit SAP18	O00422	SAP18	baseline	-0.0271849	0.0380855	439.909	0.713786	0.475738	0.743727
seq.12831.21	Calcineurin B homologous protein 3	Q96BS2	TESC	baseline	0.144426	0.0546492	440.944	-2.64279	0.00851521	0.0907175
seq.12832.10	Set1/Ash2 histone methyltransferase complex subunit ASH2	Q9UBL3	ASH2L	baseline	0.0270281	0.0513971	414.972	-0.525868	0.599261	0.819439
seq.12834.3	Potassium voltage-gated channel subfamily F member 1	Q9H3M0	KCNF1	baseline	0.0377238	0.0410758	414.686	-0.918396	0.358946	0.662474
seq.12835.101	Pyrin domain-containing protein 1	Q8WXC3	PYDC1	baseline	0.048091	0.0580345	347.125	-0.828661	0.407866	0.695119
seq.12838.28	Dual specificity protein phosphatase 15	Q9H1R2	DUSP15	baseline	-0.146921	0.10327	346.69	1.42269	0.155726	0.447874
seq.12842.43	Syntaxin-10	O60499	STX10	baseline	-0.0506303	0.0813724	387.451	0.622205	0.534173	0.782227
seq.12843.6	Zinc finger protein 410	Q86VK4	ZNF410	baseline	-0.0484834	0.0615232	345.946	0.788051	0.431207	0.714314
seq.12844.10	BAG family molecular chaperone regulator 4	O95429	BAG4	baseline	0.163531	0.061237	439.73	-2.67047	0.00785538	0.0859791
seq.12845.18	Sorting nexin-17	Q15036	SNX17	baseline	0.0254175	0.0445337	454.057	-0.570747	0.568454	0.802458
seq.12846.3	F-box/LRR-repeat protein 5	Q9UKA1	FBXL5	baseline	0.0750789	0.0672987	358.925	-1.11561	0.265337	0.571286
seq.12847.27	mRNA-capping enzyme	O60942	RNGTT	baseline	0.0549329	0.0472049	403.368	-1.16371	0.245229	0.548839
seq.12848.9	Rho guanine nucleotide exchange factor 2	Q92974	ARHGEF2	baseline	-0.0432281	0.064423	405.813	0.671004	0.502599	0.762069
seq.12849.25	GSK3-beta interaction protein	Q9P0R6	GSKIP	baseline	-0.05403	0.0592174	386.772	0.912402	0.362126	0.664743
seq.12851.5	DNA-directed DNA/RNA polymerase mu	Q9NP87	POLM	baseline	0.0696589	0.0463121	379.398	-1.50412	0.133383	0.417445
seq.12853.112	Tropomodulin-2	Q9NZR1	TMOD2	baseline	-0.112501	0.111885	447.424	1.0055	0.315197	0.625109
seq.12854.3	Transcriptional enhancer factor TEF-5	Q99594	TEAD3	baseline	0.190934	0.100215	330.524	-1.90524	0.0576159	0.27612
seq.12855.16	Cas scaffolding protein family member 4	Q9NQ75	CASS4	baseline	0.00608177	0.0489482	452.964	-0.124249	0.901173	0.962438
seq.12856.14	Transmembrane protein 237	Q96Q45	TMEM237	baseline	-0.0172076	0.0434732	386.759	0.395822	0.692455	0.867661
seq.12859.33	Enoyl-CoA delta isomerase 2, mitochondrial	O75521	ECI2	baseline	-0.118163	0.0647936	429.357	1.82368	0.0688959	0.305814
seq.12860.7	cAMP-regulated phosphoprotein 21	Q9UBL0	ARPP21	baseline	0.00113943	0.0337246	435.925	-0.0337863	0.973063	0.991627
seq.12861.13	Tropomodulin-3	Q9NYL9	TMOD3	baseline	-0.084488	0.0651611	452.387	1.2966	0.195429	0.496957
seq.12862.14	Enhancer of filamentation 1	Q14511	NEDD9	baseline	0.0343806	0.029868	446.984	-1.15108	0.250313	0.555306
seq.12864.9	Magnesium transporter NIPA4	Q0D2K0	NIPAL4	baseline	0.0495121	0.0481218	425.175	-1.02889	0.304116	0.614571
seq.12867.40	Dynein light chain Tctex-type 3	P51808	DYNLT3	baseline	0.00768053	0.0486241	335.602	-0.157957	0.874585	0.951224
seq.12869.68	Probable ATP-dependent RNA helicase DDX6	P26196	DDX6	baseline	-0.0835059	0.0802318	452.223	1.04081	0.298521	0.610292
seq.12871.10	Twinfilin-1	Q12792	TWF1	baseline	0.0243737	0.0583139	429.519	-0.417974	0.676175	0.85906
seq.12872.35	Cyclic nucleotide-gated olfactory channel	Q16280	CNGA2	baseline	0.0216461	0.0384153	426.845	-0.563477	0.573406	0.805752
seq.12873.11	Leukosialin	P16150	SPN	baseline	-0.11526	0.0496241	385.443	2.32266	0.0207174	0.155231
seq.12875.28	Ubiquitin domain-containing protein 2	Q8WUN7	UBTD2	baseline	0.0327841	0.0425002	444.269	-0.771386	0.440888	0.719538
seq.12876.39	Sperm flagellar protein 1	Q9Y4P9	SPEF1	baseline	0.0164848	0.0467487	404.721	-0.352627	0.724552	0.884035
seq.12878.60	Oxysterol-binding protein-related protein 11	Q9BXB4	OSBPL11	baseline	-0.191624	0.0978428	376.047	1.95849	0.0509117	0.261454
seq.12879.5	Retinoblastoma-like protein 1	P28749	RBL1	baseline	0.0745659	0.048088	384.426	-1.55061	0.121817	0.397989
seq.12880.1	Synaptic vesicle glycoprotein 2A	Q7L0J3	SV2A	baseline	-0.000384816	0.0371802	398.274	0.01035	0.991747	0.996865
seq.12881.17	Retinol dehydrogenase 16	O75452	RDH16	baseline	-0.0279355	0.040957	430.807	0.68207	0.495561	0.756968
seq.12882.7	Poly [ADP-ribose] polymerase 11	Q9NR21	PARP11	baseline	-0.0784333	0.054695	421.444	1.43401	0.15231	0.442089
seq.12885.42	Nuclear receptor subfamily 1 group D member 2	Q14995	NR1D2	baseline	-0.023658	0.0378911	395.305	0.624367	0.532746	0.780792
seq.12888.18	Histone deacetylase complex subunit SAP30	O75446	SAP30	baseline	-0.157606	0.118405	404.5	1.33107	0.183915	0.482842
seq.12891.1	MICAL-like protein 2	Q8IY33	MICALL2	baseline	-0.043644	0.0421205	415.854	1.03617	0.300725	0.612579
seq.12892.10	Synaptotagmin-like protein 1	Q8IYJ3	SYTL1	baseline	-0.00617656	0.0436149	434.15	0.141616	0.887449	0.958354
seq.12893.159	Gamma-interferon-inducible protein 16:Isoform 2, Hematopoietic expression, interferon-inducible nature, and nuclear localization 2	Q16666	IFI16	baseline	-0.00600617	0.105098	454.136	0.0571482	0.954452	0.986605
seq.12894.3	PAX-interacting protein 1	Q6ZW49	PAXIP1	baseline	0.0358373	0.0483378	445.825	-0.741393	0.458845	0.733303
seq.12895.28	Diacylglycerol kinase beta	Q9Y6T7	DGKB	baseline	0.0263166	0.0632553	389.097	-0.416038	0.677612	0.859321
seq.12904.180	cubilin	O60494	CUBN	baseline	0.017739	0.0428449	438.939	-0.414028	0.679055	0.860114
seq.12916.3	Protein p13 MTCP-1	P56278	MTCP1	baseline	-0.0593579	0.0424253	415.483	1.39912	0.162524	0.456728
seq.12923.51	Keratin, type I cytoskeletal 17	Q04695	KRT17	baseline	0.0289829	0.0438445	440.407	-0.661038	0.508934	0.765732
seq.12925.105	Axin-2	Q9Y2T1	AXIN2	baseline	0.0164895	0.0675329	428.728	-0.244169	0.807216	0.921355
seq.12931.16	Mineralocorticoid receptor	P08235	NR3C2	baseline	0.0174615	0.108192	353.562	-0.161393	0.871876	0.949153
seq.12933.17	Ecto-NOX disulfide-thiol exchanger 1	Q8TC92	ENOX1	baseline	-0.149545	0.0742502	447.769	2.01407	0.0446	0.242831
seq.12934.1	E3 ISG15--protein ligase HERC5	Q9UII4	HERC5	baseline	-0.0500361	0.0484471	453.076	1.0328	0.302249	0.613425
seq.12936.38	Retinaldehyde-binding protein 1	P12271	RLBP1	baseline	-0.0842093	0.0546018	398.104	1.54225	0.123808	0.401558
seq.12939.1	DNA-directed RNA polymerases I and III subunit RPAC1	O15160	POLR1C	baseline	-0.0933091	0.0580235	434.74	1.60813	0.108534	0.378733
seq.12940.35	Aldehyde dehydrogenase family 3 member B1	P43353	ALDH3B1	baseline	0.145854	0.0611658	440.146	-2.38457	0.0175215	0.138925
seq.12945.33	Ras-related protein Rab-18	Q9NP72	RAB18	baseline	-0.071746	0.074736	448.086	0.959993	0.337577	0.645073
seq.12954.71	Peroxisome proliferator-activated receptor alpha	Q07869	PPARA	baseline	-0.176783	0.0912279	402.462	1.93782	0.0533448	0.267817
seq.12956.40	KIF1-binding protein	Q96EK5	KIFBP	baseline	-0.115498	0.111935	444.798	1.03183	0.302711	0.613826
seq.12957.62	Cytochrome b-c1 complex subunit 7	P14927	UQCRB	baseline	-0.012359	0.037283	410.347	0.33149	0.740443	0.893268
seq.12960.9	Glucokinase	P35557	GCK	baseline	0.00240508	0.0844234	456.224	-0.0284883	0.977285	0.993245
seq.12963.1	Protein GPR107	Q5VW38	GPR107	baseline	-0.0194268	0.0522262	376.798	0.371975	0.710121	0.876089
seq.12968.2	Cysteine and glycine-rich protein 2	Q16527	CSRP2	baseline	-0.103268	0.0418493	444.825	2.46761	0.0139772	0.122865
seq.12970.35	Double-stranded RNA-binding protein Staufen homolog 2	Q9NUL3	STAU2	baseline	-0.0695341	0.0492108	397.138	1.41299	0.158443	0.45132
seq.12975.11	Keratin, type I cytoskeletal 20	P35900	KRT20	baseline	-0.0772221	0.0799597	436.731	0.965763	0.334697	0.642942
seq.12976.49	Vinexin b	O60504	SORBS3	baseline	0.193422	0.0476426	391.497	-4.05986	5.93148e-05	0.00265033
seq.12980.31	Pre-mRNA-splicing factor RBM22	Q9NW64	RBM22	baseline	-0.0305219	0.0985114	403.962	0.309831	0.756849	0.899128
seq.12986.12	Protein lin-7 homolog C	Q9NUP9	LIN7C	baseline	-0.153441	0.0632264	446.714	2.42685	0.015625	0.130713
seq.12987.12	Serine/arginine-rich splicing factor 7	Q16629	SRSF7	baseline	0.293702	0.0722404	448.169	-4.06563	5.65819e-05	0.00254317
seq.12988.49	RNA-binding protein EWS	Q01844	EWSR1	baseline	0.39518	0.0952183	449.891	-4.15026	3.97275e-05	0.00204335
seq.12990.39	Mitogen-activated protein kinase kinase kinase 3	Q99759	MAP3K3	baseline	0.0150334	0.0707623	453.127	-0.21245	0.831852	0.934864
seq.12991.49	Cullin-9	Q8IWT3	CUL9	baseline	0.0284758	0.0619163	452.414	-0.459909	0.645803	0.842438
seq.12993.21	Nuclear protein localization protein 4 homolog	Q8TAT6	NPLOC4	baseline	-0.0944084	0.0867344	448.114	1.08848	0.276969	0.585385
seq.13007.66	Epididymal-specific lipocalin-10	Q6JVE6	LCN10	baseline	-0.0934887	0.0581883	437.976	1.60666	0.10885	0.378987
seq.13011.20	40S ribosomal protein S10	P46783	RPS10	baseline	-0.179292	0.0954623	450.043	1.87814	0.0610083	0.285006
seq.13013.41	E3 ubiquitin-protein ligase parkin	O60260	PRKN	baseline	-0.0981597	0.0480495	447.953	2.04289	0.0416485	0.236618
seq.13022.20	Tumor protein p53-inducible protein 11	O14683	TP53I11	baseline	-0.0299224	0.0894732	431.734	0.334429	0.738218	0.892688
seq.13025.4	Fibroblast growth factor receptor substrate 2	Q8WU20	FRS2	baseline	0.0212808	0.0324333	423.84	-0.656142	0.512089	0.768285
seq.13027.20	Chromobox protein homolog 7	O95931	CBX7	baseline	0.122651	0.0359668	438.615	-3.41013	0.000709398	0.0152651
seq.13032.1	Beclin-1	Q14457	BECN1	baseline	-0.0635885	0.0556838	342.213	1.14196	0.25427	0.559201
seq.13039.1	Nuclear inhibitor of protein phosphatase 1	Q12972	PPP1R8	baseline	-0.0180479	0.0680771	407.947	0.26511	0.791059	0.912511
seq.13041.47	TNF receptor-associated factor 4	Q9BUZ4	TRAF4	baseline	0.0275931	0.0299307	393.309	-0.9219	0.357146	0.661517
seq.13042.7	Potassium voltage-gated channel subfamily A member 10	Q16322	KCNA10	baseline	-0.000828774	0.045458	423.536	0.0182316	0.985463	0.994119
seq.13043.157	ATPase family AAA domain-containing protein 2	Q6PL18	ATAD2	baseline	-0.0319593	0.0374512	430.328	0.85336	0.393934	0.684769
seq.13044.5	Tumor susceptibility gene 101 protein	Q99816	TSG101	baseline	-0.0849867	0.0923141	451.076	0.920625	0.357738	0.662439
seq.13053.6	Sodium- and chloride-dependent neutral and basic amino acid transporter B(0+)	Q9UN76	SLC6A14	baseline	-0.0522701	0.0514801	438.662	1.01534	0.310501	0.620839
seq.13054.87	Profilin-2	P35080	PFN2	baseline	0.000898666	0.0454395	455.013	-0.0197772	0.98423	0.994109
seq.13055.53	PH and SEC7 domain-containing protein 1	A5PKW4	PSD	baseline	-0.108266	0.0551524	448.552	1.96303	0.0502597	0.259834
seq.13056.18	Orphan sodium- and chloride-dependent neurotransmitter transporter NTT5	Q9GZN6	SLC6A16	baseline	-0.040008	0.0973195	351.56	0.411099	0.68125	0.86166
seq.13059.33	Riboflavin kinase	Q969G6	RFK	baseline	0.0969103	0.0956433	457.173	-1.01325	0.311478	0.621541
seq.13062.4	Glia maturation factor gamma	O60234	GMFG	baseline	0.0745548	0.0858545	452.459	-0.868386	0.385644	0.679304
seq.13066.42	Enhancer of mRNA-decapping protein 4	Q6P2E9	EDC4	baseline	0.0798015	0.0570625	453.719	-1.39849	0.162648	0.456907
seq.13067.5	cGMP-dependent protein kinase 1, beta isozyme	Q13976	PRKG1	baseline	0.0321104	0.035418	454.79	-0.906612	0.365092	0.667286
seq.13068.139	Copper chaperone for superoxide dismutase	O14618	CCS	baseline	-0.156835	0.0746661	438.337	2.10048	0.036257	0.218578
seq.13073.14	Acidic leucine-rich nuclear phosphoprotein 32 family member A	P39687	ANP32A	baseline	0.00781999	0.0387391	442.098	-0.201863	0.840117	0.937513
seq.13076.4	Fragile X mental retardation syndrome-related protein 1	P51114	FXR1	baseline	-0.133766	0.0973704	413.397	1.37378	0.170253	0.468587
seq.13078.3	Centrin-2	P41208	CETN2	baseline	0.0176286	0.0548719	456.779	-0.321269	0.748154	0.895322
seq.13082.9	Protein unc-45 homolog A	Q9H3U1	UNC45A	baseline	-0.105502	0.107125	451.299	0.984854	0.325224	0.633436
seq.13083.18	Valine--tRNA ligase	P26640	VARS1	baseline	-0.0926933	0.042148	441.441	2.19923	0.0283793	0.189454
seq.13085.18	Glucagon-like peptide 1 receptor:Cytoplasmic domain	P43220	GLP1R	baseline	-0.000191168	0.0669402	354.975	0.00285581	0.997723	0.999697
seq.13088.397	Betacellulin	P35070	BTC	baseline	0.0376191	0.043133	426.797	-0.872166	0.383608	0.679304
seq.13089.6	Hypoxia-inducible factor 1-alpha	Q16665	HIF1A	baseline	-0.113549	0.0640447	405.35	1.77296	0.0769858	0.322195
seq.13090.17	Protein S100-A6	P06703	S100A6	baseline	0.525468	0.108052	453.834	-4.8631	1.59585e-06	0.00024739
seq.13093.6	Secreted and transmembrane protein 1	Q8WVN6	SECTM1	baseline	0.0550706	0.0411921	412.12	-1.33692	0.181986	0.481028
seq.13094.75	R-spondin-3	Q9BXY4	RSPO3	baseline	0.0470705	0.0868427	398.405	-0.54202	0.588108	0.813248
seq.13095.51	Lithostathine-1-alpha	P05451	REG1A	baseline	0.0165453	0.111571	420.322	-0.148294	0.882182	0.954974
seq.13097.11	Bcl-2-like protein 2	Q92843	BCL2L2	baseline	-0.0726422	0.0440448	380.592	1.64928	0.0999152	0.366266
seq.13098.93	Vascular endothelial growth factor D	O43915	VEGFD	baseline	-0.0414689	0.086448	441.422	0.479698	0.63168	0.83593
seq.13101.60	Sclerostin	Q9BQB4	SOST	baseline	0.0065412	0.0316254	435.654	-0.206834	0.836236	0.936881
seq.13102.1	Protein FAM3D	Q96BQ1	FAM3D	baseline	0.191594	0.118882	416.402	-1.61162	0.107801	0.378547
seq.13103.125	Chorionic somatomammotropin hormone	P0DML2|P0DML3	CSH1|CSH2	baseline	0.0462034	0.058831	456.876	-0.785359	0.43265	0.714692
seq.13104.32	Ephrin-B1	P98172	EFNB1	baseline	0.0259794	0.0366351	399.234	-0.70914	0.478651	0.74522
seq.13105.7	Synaptosomal-associated protein 25	P60880	SNAP25	baseline	-0.0319041	0.137212	453.385	0.232517	0.816241	0.926301
seq.13107.9	Ly6/PLAUR domain-containing protein 3	O95274	LYPD3	baseline	-0.0479722	0.0433325	430.865	1.10707	0.26888	0.576465
seq.13109.82	Neuronal growth regulator 1	Q7Z3B1	NEGR1	baseline	0.00801356	0.0403914	423.326	-0.198398	0.842829	0.93834
seq.13111.79	B-cell lymphoma 6 protein	P41182	BCL6	baseline	-0.0194327	0.0621354	373.584	0.312747	0.754647	0.898198
seq.13112.179	Follistatin-related protein 1	Q12841	FSTL1	baseline	0.0769312	0.0453251	427.736	-1.69732	0.0903634	0.348708
seq.13113.7	Osteopontin	P10451	SPP1	baseline	0.106917	0.103674	410.304	-1.03128	0.303017	0.614139
seq.13114.50	Lumican	P51884	LUM	baseline	0.0460599	0.0512417	420.622	-0.898875	0.369233	0.671462
seq.13116.25	CD177 antigen	Q8N6Q3	CD177	baseline	-0.0341023	0.166793	359.465	0.204459	0.83811	0.937382
seq.13117.232	Choline/ethanolamine kinase	Q9Y259	CHKB	baseline	-0.134785	0.0954365	453.193	1.4123	0.158547	0.451395
seq.13118.5	SPARC-related modular calcium-binding protein 1	Q9H4F8	SMOC1	baseline	0.134961	0.134537	441.695	-1.00315	0.316337	0.626243
seq.13119.26	Protein Z-dependent protease inhibitor	Q9UK55	SERPINA10	baseline	0.0697531	0.0675277	439.584	-1.03295	0.302193	0.613425
seq.13122.19	Leucine-rich repeat transmembrane protein FLRT2	O43155	FLRT2	baseline	-0.014948	0.0624754	436.896	0.239263	0.811014	0.923054
seq.13123.3	Leucine-rich repeat transmembrane protein FLRT3:Extracellular domain	Q9NZU0	FLRT3	baseline	0.0800527	0.0757552	427.194	-1.05673	0.291232	0.601022
seq.13124.20	Immunoglobulin superfamily containing leucine-rich repeat protein 2	Q6UXK2	ISLR2	baseline	-0.0815046	0.0463143	426.824	1.75982	0.0791555	0.326084
seq.13125.45	Vitronectin	P04004	VTN	baseline	-0.104632	0.165943	344.752	0.630532	0.528764	0.778692
seq.13126.52	Desmocollin-2	Q02487	DSC2	baseline	-0.00958722	0.0532382	420.3	0.180082	0.857175	0.943912
seq.13129.40	Low-density lipoprotein receptor	P01130	LDLR	baseline	0.0252629	0.0353715	448.369	-0.714216	0.475465	0.743727
seq.13130.150	Hexokinase-2	P52789	HK2	baseline	-0.0302778	0.11361	452.418	0.266507	0.78997	0.911947
seq.13131.5	Hexokinase-1	P19367	HK1	baseline	-0.0628666	0.0459193	450.225	1.36907	0.171661	0.468984
seq.13132.14	Semaphorin-5A	Q13591	SEMA5A	baseline	-0.167336	0.0797082	417.527	2.09936	0.0363849	0.218655
seq.13133.73	Latent-transforming growth factor beta-binding protein 4	Q8N2S1	LTBP4	baseline	0.129731	0.0764025	432.802	-1.69799	0.0902277	0.348708
seq.13228.75	E3 ubiquitin-protein ligase Mdm2	Q00987	MDM2	baseline	-0.0402068	0.0620348	394.017	0.648133	0.517276	0.771418
seq.13229.20	Protein Mdm4	O15151	MDM4	baseline	-0.00512982	0.0762455	421.452	0.0672803	0.94639	0.982747
seq.13230.174	Ig gamma-2, Kappa	P01859	IGHG2	baseline	-0.0174109	0.0539458	394.742	0.322747	0.747058	0.895322
seq.13231.90	Ig gamma-4, Kappa	P01861	IGHG4	baseline	0.140944	0.0669593	429.916	-2.10493	0.0358775	0.216806
seq.13236.25	Protein Wnt-3a	P56704	WNT3A	baseline	-0.00966228	0.0633084	432.786	0.152622	0.878767	0.953452
seq.13240.170	SH3 and multiple ankyrin repeat domains protein 1	Q9Y566	SHANK1	baseline	-0.088726	0.0736116	424.655	1.20533	0.228749	0.531435
seq.13242.134	SH3 and multiple ankyrin repeat domains protein 3	Q9BYB0	SHANK3	baseline	-0.0996911	0.0931373	426.339	1.07037	0.28506	0.59503
seq.13256.21	SH3 and multiple ankyrin repeat domains protein 1	Q9Y566	SHANK1	baseline	0.0543345	0.062993	383.165	-0.862549	0.388925	0.681566
seq.13268.45	Protein Wnt-5a	P41221	WNT5A	baseline	-0.0454135	0.0895008	435.555	0.507409	0.612125	0.825876
seq.13374.4	Beta-defensin 113	Q30KQ7	DEFB113	baseline	-0.0711414	0.0914105	375.913	0.778263	0.436903	0.717034
seq.13375.48	Synaptogyrin-3	O43761	SYNGR3	baseline	-0.0831341	0.0718124	408.277	1.15766	0.247681	0.55205
seq.13377.3	Cytochrome b561 domain-containing protein 1	Q8N8Q1	CYB561D1	baseline	-0.0803501	0.0733285	439.261	1.09576	0.273786	0.581402
seq.13378.80	Glutaredoxin-like protein C5orf63	A6NC05	C5orf63	baseline	-0.0851213	0.0495913	429.774	1.71646	0.0867992	0.342282
seq.13381.49	Beta-1,4-galactosyltransferase 1	P15291	B4GALT1	baseline	0.134437	0.0516473	438.437	-2.60298	0.0095549	0.0980798
seq.13384.110	Fumarate hydratase, mitochondrial	P07954	FH	baseline	0.169901	0.158769	453.088	-1.07011	0.285139	0.595031
seq.13386.248	E3 ubiquitin-protein ligase RNF34	Q969K3	RNF34	baseline	0.0111063	0.0319345	432.768	-0.347783	0.728172	0.886215
seq.13387.55	ETS homologous factor	Q9NZC4	EHF	baseline	-0.00488588	0.0657148	341.311	0.0743498	0.940776	0.98015
seq.13388.57	Neuroendocrine convertase 1	P29120	PCSK1	baseline	-0.0216629	0.0518342	370.321	0.417926	0.676244	0.85906
seq.13392.13	Sodium/potassium-transporting ATPase subunit beta-1	P05026	ATP1B1	baseline	-0.0780231	0.0636708	451.053	1.22541	0.221059	0.525395
seq.13393.46	Derlin-1	Q9BUN8	DERL1	baseline	-0.0602564	0.0952773	439.542	0.632431	0.527434	0.777684
seq.13397.88	Beta-defensin 4A	O15263	DEFB4A	baseline	-0.32749	0.200688	394.143	1.63184	0.103512	0.372024
seq.13399.33	RELT-like protein 1	Q8IUW5	RELL1	baseline	-0.0200116	0.0588337	377.58	0.340138	0.733942	0.8898
seq.13403.5	ETS translocation variant 5	P41161	ETV5	baseline	0.106908	0.0487331	445.888	-2.19375	0.0287688	0.190015
seq.13405.61	Serine protease inhibitor Kazal-type 2	P20155	SPINK2	baseline	0.0770385	0.0829727	354.882	-0.92848	0.35379	0.658189
seq.13406.161	CMRF35-like molecule 6	Q08708	CD300C	baseline	-0.194144	0.180521	342.16	1.07547	0.282924	0.59326
seq.13408.23	WAP, Kazal, immunoglobulin, Kunitz and NTR domain-containing protein 2	Q8TEU8	WFIKKN2	baseline	-0.0386835	0.0573187	404.935	0.674884	0.500134	0.75998
seq.13411.21	E3 ubiquitin-protein ligase NRDP1	Q9H4P4	RNF41	baseline	0.0705097	0.0381194	443.588	-1.84971	0.0650205	0.297169
seq.13412.5	WAP four-disulfide core domain protein 6	Q9BQY6	WFDC6	baseline	-0.14748	0.0775362	353.457	1.90208	0.0579728	0.276609
seq.13416.8	Transmembrane protein 132D	Q14C87	TMEM132D	baseline	-0.0827095	0.073484	425.524	1.12554	0.260993	0.566429
seq.13421.17	Protein kish-B	Q9NRX6	TMEM167B	baseline	-0.0550944	0.0328252	392.8	1.67842	0.0940606	0.356351
seq.13422.66	Ecto-NOX disulfide-thiol exchanger 2	Q16206	ENOX2	baseline	-0.0429619	0.0350806	432.203	1.22466	0.221369	0.525883
seq.13423.94	Redox-regulatory protein FAM213A	Q9BRX8	PRXL2A	baseline	0.00171245	0.0620093	372.715	-0.0276161	0.977983	0.993245
seq.13427.66	Mannosyl-oligosaccharide 1,2-alpha-mannosidase IC	Q9NR34	MAN1C1	baseline	-0.0416641	0.0522862	436.7	0.796847	0.425973	0.711704
seq.13429.3	WAP four-disulfide core domain protein 10A	Q9H1F0	WFDC10A	baseline	-0.144941	0.0690195	393.568	2.1	0.0363648	0.218655
seq.13430.50	Urea transporter 1	Q13336	SLC14A1	baseline	-0.014487	0.056045	453.386	0.25849	0.796146	0.915737
seq.13431.74	Membrane protein FAM159A	Q6UWV7	SHISAL2A	baseline	0.0069623	0.0628306	384.38	-0.110811	0.911824	0.966404
seq.13432.9	Protrudin:Cytoplasmic domain, region 1, isoform 6	Q5T4F4	ZFYVE27	baseline	-0.0963906	0.0736286	352.181	1.30915	0.191338	0.492345
seq.13434.172	Alpha-parvin	Q9NVD7	PARVA	baseline	0.0939971	0.0802167	438.558	-1.17179	0.241917	0.545117
seq.13435.31	Interleukin-20 receptor subunit beta	Q6UXL0	IL20RB	baseline	0.24158	0.206396	331.935	-1.17047	0.242652	0.546129
seq.13436.54	Myc-associated zinc finger protein	P56270	MAZ	baseline	0.0517073	0.0494601	364.245	-1.04544	0.296515	0.608737
seq.13438.115	Chordin	Q9H2X0	CHRD	baseline	-0.0130762	0.097721	352.159	0.133812	0.893628	0.960113
seq.13439.6	IQ domain-containing protein F3	P0C7M6	IQCF3	baseline	-0.0869288	0.0604608	444.103	1.43777	0.151203	0.441028
seq.13441.30	Dixin	Q155Q3	DIXDC1	baseline	-0.0505115	0.0390569	431.098	1.29328	0.196606	0.497478
seq.13447.42	Shadow of prion protein	Q5BIV9	SPRN	baseline	0.0180958	0.119269	435.576	-0.151722	0.879476	0.95354
seq.13449.25	Splicing factor 3B subunit 4	Q15427	SF3B4	baseline	0.081943	0.0455392	406.417	-1.79939	0.0726982	0.313225
seq.13450.49	Ubiquitin carboxyl-terminal hydrolase 8	P40818	USP8	baseline	-0.121779	0.0932122	446.943	1.30648	0.192063	0.493375
seq.13451.2	Fibronectin type III domain-containing protein 4	Q9H6D8	FNDC4	baseline	-0.0358666	0.067546	441.919	0.530995	0.595689	0.817967
seq.13452.113	Small integral membrane protein 13	P0DJ93	SMIM13	baseline	0.0553194	0.0317217	444.309	-1.7439	0.0818682	0.331311
seq.13453.2	39S ribosomal protein L33, mitochondrial	O75394	MRPL33	baseline	-0.0748232	0.106623	453.469	0.701755	0.483192	0.747904
seq.13457.33	ETS-related transcription factor Elf-5	Q9UKW6	ELF5	baseline	0.0127959	0.0404264	427.635	-0.316523	0.75176	0.897097
seq.13459.30	Torsin-4A	Q9NXH8	TOR4A	baseline	0.017694	0.0535033	411.113	-0.330708	0.741033	0.893363
seq.13460.4	Chondroadherin	O15335	CHAD	baseline	-0.160623	0.107216	407.134	1.49811	0.134878	0.420409
seq.13463.1	Peroxidasin homolog	Q92626	PXDN	baseline	-0.00517292	0.0801535	427.633	0.0645377	0.948572	0.983129
seq.13464.8	Nutritionally-regulated adipose and cardiac enriched protein homolog	Q8N912	NRAC	baseline	-0.0330366	0.0570245	425.234	0.57934	0.562666	0.799953
seq.13465.5	Calcipressin-1	P53805	RCAN1	baseline	-0.0419295	0.0944732	455.87	0.443824	0.657381	0.849662
seq.13468.5	Neuralized-like protein 4	Q96JN8	NEURL4	baseline	-0.0559843	0.0602074	455.128	0.929856	0.352938	0.658134
seq.13470.43	Parathyroid hormone/parathyroid hormone-related peptide receptor	Q03431	PTH1R	baseline	0.111182	0.082929	374.222	-1.34069	0.180835	0.479952
seq.13472.35	Haloacid dehalogenase-like hydrolase domain-containing protein 2	Q9H0R4	HDHD2	baseline	0.290946	0.0967526	454.382	-3.00711	0.00278371	0.0412185
seq.13473.55	Inositol-trisphosphate 3-kinase A	P23677	ITPKA	baseline	-0.0375254	0.0357336	444.5	1.05014	0.294223	0.605648
seq.13474.40	Glutathione S-transferase kappa 1	Q9Y2Q3	GSTK1	baseline	-0.148184	0.108083	443.335	1.37102	0.171063	0.46862
seq.13475.10	Ubiquitin-conjugating enzyme E2 D4	Q9Y2X8	UBE2D4	baseline	0.0587944	0.0654411	452.095	-0.898432	0.369433	0.671504
seq.13476.16	DNA/RNA-binding protein KIN17	O60870	KIN	baseline	0.0528876	0.0532139	393.798	-0.993869	0.320897	0.630036
seq.13477.65	Leukotriene B4 receptor 1	Q15722	LTB4R	baseline	-0.260288	0.113805	440.564	2.28714	0.0226611	0.164093
seq.13479.8	Protein FAM171A2	A8MVW0	FAM171A2	baseline	0.0739728	0.0530097	450.74	-1.39546	0.163565	0.458555
seq.13481.24	Transcription elongation factor A protein 2	Q15560	TCEA2	baseline	0.0764744	0.0352387	451.884	-2.17018	0.0305133	0.197764
seq.13482.14	CCR4-NOT transcription complex subunit 1	A5YKK6	CNOT1	baseline	-0.130895	0.0797034	444.925	1.64227	0.10124	0.368826
seq.13484.69	Collagen alpha-1(I) chain:N-term propeptide	P02452	COL1A1	baseline	-0.0152811	0.0500843	354.339	0.305108	0.760463	0.900977
seq.13485.20	Transmembrane protein 87B	Q96K49	TMEM87B	baseline	-0.145467	0.0516542	385.71	2.81618	0.00510949	0.0635216
seq.13486.9	Polycystin-2:Cytoplasmic domain 1	Q13563	PKD2	baseline	-0.015378	0.0953374	435.215	0.161301	0.871931	0.949153
seq.13487.24	Protein unc-93 homolog B1	Q9H1C4	UNC93B1	baseline	-0.0844102	0.109386	359.386	0.771671	0.440817	0.719538
seq.13488.3	Arfaptin-1	P53367	ARFIP1	baseline	-0.0537709	0.0960635	447.793	0.559743	0.575934	0.806708
seq.13490.1	MAGUK p55 subfamily member 6	Q9NZW5	MPP6	baseline	0.112018	0.0402141	450.241	-2.78554	0.00556946	0.0677048
seq.13491.40	Retinal rod rhodopsin-sensitive cGMP 3',5'-cyclic phosphodiesterase subunit delta	O43924	PDE6D	baseline	-0.0137772	0.086725	412.773	0.15886	0.873857	0.950704
seq.13492.44	Stress-70 protein, mitochondrial	P38646	HSPA9	baseline	0.0222574	0.118368	445.581	-0.188035	0.850935	0.941045
seq.13493.5	Glutamate receptor ionotropic, delta-1	Q9ULK0	GRID1	baseline	-0.00857766	0.0500642	362.281	0.171333	0.864057	0.946806
seq.13494.6	Ceramide synthase 5	Q8N5B7	CERS5	baseline	0.00457157	0.0432348	438.849	-0.105738	0.915838	0.968227
seq.13495.48	Hydroxycarboxylic acid receptor 2	Q8TDS4	HCAR2	baseline	-0.0927914	0.0721502	402.866	1.28609	0.199152	0.500912
seq.13496.19	Hydroxymethylglutaryl-CoA synthase, cytoplasmic	Q01581	HMGCS1	baseline	-0.0818729	0.149957	442.263	0.545976	0.585358	0.811757
seq.13497.34	Eukaryotic translation initiation factor 3 subunit J	O75822	EIF3J	baseline	-0.0622432	0.0644983	448.707	0.965036	0.335046	0.643005
seq.13498.1	Inositol oxygenase	Q9UGB7	MIOX	baseline	0.0630246	0.094454	354.85	-0.667252	0.505045	0.763903
seq.13499.30	Coagulation Factor VIII	P00451	F8	baseline	-0.0770985	0.0686646	437.493	1.12283	0.262127	0.567917
seq.13501.10	Solute carrier family 35 member G2	Q8TBE7	SLC35G2	baseline	-0.170053	0.0988761	440.414	1.71986	0.0861599	0.341048
seq.13502.2	Sodium-independent sulfate anion transporter	Q86WA9	SLC26A11	baseline	-0.173465	0.0815042	384.255	2.12829	0.0339489	0.210168
seq.13503.19	PRA1 family protein 3	O75915	ARL6IP5	baseline	0.0211677	0.103766	439.269	-0.203995	0.838452	0.937382
seq.13504.147	Heterogeneous nuclear ribonucleoprotein R	O43390	HNRNPR	baseline	0.044014	0.0635585	454.757	-0.692496	0.48898	0.751728
seq.13506.10	tRNA-dihydrouridine(20) synthase [NAD(P)+]-like	Q9NX74	DUS2	baseline	-0.120187	0.0591426	444.159	2.03215	0.0427334	0.238261
seq.13507.51	Tumor necrosis factor receptor type 1-associated DEATH domain protein	Q15628	TRADD	baseline	-0.136522	0.0544744	448.856	2.50617	0.0125575	0.11548
seq.13509.5	Secretory carrier-associated membrane protein 5	Q8TAC9	SCAMP5	baseline	-0.0852156	0.0368948	447.363	2.30969	0.0213597	0.158387
seq.13510.7	Sarcoplasmic/endoplasmic reticulum calcium ATPase 3	Q93084	ATP2A3	baseline	-0.0129007	0.0319385	406.743	0.403923	0.686482	0.864332
seq.13511.29	DNA-binding protein SATB1	Q01826	SATB1	baseline	0.00279747	0.045874	450.797	-0.0609816	0.951401	0.984852
seq.13512.28	Heterogeneous nuclear ribonucleoprotein R	O43390	HNRNPR	baseline	-0.0118307	0.0477007	340.352	0.24802	0.804269	0.91951
seq.13513.174	E3 SUMO-protein ligase PIAS3	Q9Y6X2	PIAS3	baseline	-0.029911	0.0508141	432.279	0.588637	0.556412	0.795952
seq.13514.121	Ras-related protein Rab-35	Q15286	RAB35	baseline	0.00267688	0.0523036	389.089	-0.0511796	0.959209	0.987283
seq.13515.8	Regulation of nuclear pre-mRNA domain-containing protein 1A	Q96P16	RPRD1A	baseline	0.0147833	0.0354849	399.791	-0.416609	0.677188	0.859321
seq.13516.46	ER membrane protein complex subunit 4	Q5J8M3	EMC4	baseline	-0.0426736	0.0750746	449.855	0.568417	0.570036	0.803033
seq.13517.3	Patched domain-containing protein 3	Q3KNS1	PTCHD3	baseline	-0.107886	0.0522784	386.613	2.06368	0.039715	0.230462
seq.13518.5	Arf-GAP with SH3 domain, ANK repeat and PH domain-containing protein 2	O43150	ASAP2	baseline	-0.156666	0.11757	418.214	1.33253	0.183411	0.482074
seq.13519.112	Rho guanine nucleotide exchange factor 25	Q86VW2	ARHGEF25	baseline	0.02193	0.04353	358.317	-0.503791	0.614718	0.826734
seq.13522.20	Visinin-like protein 1	P62760	VSNL1	baseline	0.0336809	0.0718213	416.734	-0.468955	0.639347	0.839232
seq.13524.25	Heparan-sulfate 6-O-sulfotransferase 2	Q96MM7	HS6ST2	baseline	0.195847	0.0551787	453.174	-3.54932	0.000426572	0.0106587
seq.13525.17	Potassium voltage-gated channel subfamily G member 4	Q8TDN1	KCNG4	baseline	-0.0569381	0.0483288	448.729	1.17814	0.239365	0.542265
seq.13526.5	Lupus La protein:RNA recognition motif	P05455	SSB	baseline	0.200533	0.0578689	449.759	-3.4653	0.000580453	0.0131224
seq.13529.39	Nucleosome assembly protein 1-like 2	Q9ULW6	NAP1L2	baseline	0.0545125	0.0422277	451.24	-1.29092	0.197393	0.49855
seq.13530.5	Urotensin-2 receptor	Q9UKP6	UTS2R	baseline	-0.010837	0.0424862	422.73	0.255071	0.798793	0.916377
seq.13532.25	Nuclear envelope phosphatase-regulatory subunit 1	Q8N9A8	CNEP1R1	baseline	-0.0322544	0.0360745	381.636	0.894105	0.371829	0.673556
seq.13534.20	Myomesin-2	P54296	MYOM2	baseline	0.279873	0.140888	402.947	-1.98649	0.0476559	0.252261
seq.13535.2	Collagen type IV alpha-3-binding protein:PH domain	Q9Y5P4	CERT1	baseline	0.0806316	0.0802712	446.536	-1.00449	0.315687	0.625772
seq.13536.56	DNA polymerase iota	Q9UNA4	POLI	baseline	-0.00946722	0.0403296	410.69	0.234746	0.814523	0.925522
seq.13539.131	Small conductance calcium-activated potassium channel protein 1	Q92952	KCNN1	baseline	-0.00289499	0.0337917	448.127	0.0856714	0.931766	0.975921
seq.13540.1	G-protein coupled receptor 26	Q8NDV2	GPR26	baseline	-0.00520913	0.0438578	452.343	0.118773	0.905508	0.963392
seq.13541.1	Myc target protein 1	Q8N699	MYCT1	baseline	0.00818376	0.0650634	435.623	-0.125781	0.899963	0.962292
seq.13543.7	Prostaglandin reductase 1	Q14914	PTGR1	baseline	-0.172736	0.122168	443.941	1.41392	0.158086	0.450758
seq.13544.9	Rho GTPase-activating protein 45	Q92619	ARHGAP45	baseline	-0.149112	0.103871	444.287	1.43555	0.151835	0.441723
seq.13545.97	Probable RNA-binding protein EIF1AD	Q8N9N8	EIF1AD	baseline	0.387463	0.0825443	397.372	-4.694	3.69358e-06	0.000409207
seq.13547.5	5-hydroxytryptamine receptor 7	P34969	HTR7	baseline	0.0247983	0.0919706	440.088	-0.269633	0.787569	0.911253
seq.13548.53	Phosphatidate phosphatase PPAPDC1A	Q5VZY2	PLPP4	baseline	-0.0608823	0.0531978	418.408	1.14445	0.253091	0.55811
seq.13549.15	Disintegrin and metalloproteinase domain-containing protein 29	Q9UKF5	ADAM29	baseline	0.052577	0.0466482	413.763	-1.1271	0.260355	0.565616
seq.13552.7	Switch-associated protein 70	Q9UH65	SWAP70	baseline	0.208732	0.0568801	434.547	-3.66969	0.000273024	0.00768106
seq.13553.4	DCN1-like protein 3	Q8IWE4	DCUN1D3	baseline	0.0779655	0.0634722	432.599	-1.22834	0.219987	0.524818
seq.13554.78	Replication initiator 1	Q9BWE0	REPIN1	baseline	0.0607243	0.0418322	339.113	-1.45162	0.147533	0.436394
seq.13556.28	5-hydroxytryptamine receptor 2A	P28223	HTR2A	baseline	0.0187915	0.0329471	454.057	-0.570353	0.56872	0.802542
seq.13557.3	Nectin-3	Q9NQS3	NECTIN3	baseline	-0.0544167	0.0608741	407.928	0.893922	0.371891	0.673556
seq.13561.5	5-hydroxytryptamine receptor 6	P50406	HTR6	baseline	-0.0612978	0.0429788	440.449	1.42624	0.154509	0.445239
seq.13563.259	Acyl-CoA-binding domain-containing protein 7	Q8N6N7	ACBD7	baseline	-0.0378747	0.0540268	392.829	0.701035	0.483696	0.747904
seq.13565.2	Retinoblastoma-like protein 2	Q08999	RBL2	baseline	0.251581	0.126618	443.293	-1.98692	0.0475463	0.252017
seq.13566.2	RNA polymerase II subunit A C-terminal domain phosphatase SSU72	Q9NP77	SSU72	baseline	-0.0587328	0.0980935	356.336	0.598743	0.549725	0.792317
seq.13567.1	Dihydropyrimidinase-related protein 2	Q16555	DPYSL2	baseline	-0.0107788	0.167602	378.53	0.0643117	0.948756	0.983186
seq.13568.30	26S proteasome non-ATPase regulatory subunit 4	P55036	PSMD4	baseline	0.0936703	0.0650396	441.368	-1.4402	0.150519	0.440255
seq.13570.43	Vigilin	Q00341	HDLBP	baseline	-0.0879289	0.0692189	411.761	1.2703	0.204695	0.507304
seq.13572.43	26S proteasome non-ATPase regulatory subunit 11	O00231	PSMD11	baseline	0.0971257	0.106308	453.934	-0.913627	0.361398	0.663567
seq.13573.5	Actin-related protein 2/3 complex subunit 3	O15145	ARPC3	baseline	-0.0692024	0.0854131	442.317	0.810209	0.418256	0.705389
seq.13574.50	Rho-related GTP-binding protein Rho6	Q92730	RND1	baseline	-0.0239878	0.0702865	412.944	0.341287	0.733061	0.889368
seq.13575.40	Segment polarity protein dishevelled homolog DVL-2	O14641	DVL2	baseline	-0.132496	0.065295	431.518	2.02919	0.0430525	0.238706
seq.13576.15	Glutathione S-transferase P	P09211	GSTP1	baseline	0.0043563	0.069157	457.091	-0.0629915	0.949801	0.983866
seq.13577.25	Splicing factor U2AF 65 kDa subunit	P26368	U2AF2	baseline	0.159636	0.0785621	382.534	-2.03197	0.0428468	0.238261
seq.13578.98	Actin-binding LIM protein 3	O94929	ABLIM3	baseline	-0.168808	0.119165	441.352	1.41659	0.157308	0.44945
seq.13580.2	UDP-N-acetylhexosamine pyrophosphorylase	Q16222	UAP1	baseline	0.00251592	0.0842918	439.411	-0.0298477	0.976202	0.993245
seq.13583.19	Apoptotic protease-activating factor 1	O14727	APAF1	baseline	-0.0118318	0.0578968	408.302	0.20436	0.838174	0.937382
seq.13587.10	Rac GTPase-activating protein 1	Q9H0H5	RACGAP1	baseline	-0.24467	0.156805	416.545	1.56034	0.119438	0.394852
seq.13588.11	Annexin A9	O76027	ANXA9	baseline	-0.0968998	0.0761562	336.338	1.27238	0.204116	0.507215
seq.13589.10	Amyloid beta A4 precursor protein-binding family B member 3:Phosphotyrosine Interaction Domain 2, Isoform IV	O95704	APBB3	baseline	-0.0755389	0.0813363	376.593	0.928722	0.353628	0.658189
seq.13590.1	Oligoribonuclease, mitochondrial	Q9Y3B8	REXO2	baseline	0.331961	0.0995587	454.102	-3.33432	0.000925122	0.0185415
seq.13591.31	DNA primase small subunit	P49642	PRIM1	baseline	-0.0299851	0.0422644	380.053	0.709465	0.478471	0.74522
seq.13594.158	ADP-ribosylation factor-binding protein GGA1	Q9UJY5	GGA1	baseline	0.012506	0.0688175	453.351	-0.181727	0.855878	0.943167
seq.13595.20	Thiamine-triphosphatase	Q9BU02	THTPA	baseline	-0.109386	0.0561088	386.797	1.94953	0.0519539	0.264681
seq.13596.3	Ras-related protein Rab-27B	O00194	RAB27B	baseline	-0.135109	0.0687801	431.961	1.96436	0.0501294	0.25961
seq.13597.20	Ras-related protein Rab-31	Q13636	RAB31	baseline	-0.0352184	0.0962783	437.014	0.365798	0.714693	0.878164
seq.13599.15	Rab9 effector protein with kelch motifs	Q7Z6M1	RABEPK	baseline	-0.0677244	0.0461426	399.926	1.46772	0.142966	0.430445
seq.13602.6	NHP2-like protein 1	P55769	SNU13	baseline	0.0751192	0.069212	446.927	-1.08535	0.278352	0.58705
seq.13603.7	Rieske domain-containing protein	Q8TAC1	RFESD	baseline	0.199807	0.10387	456.511	-1.92364	0.0550213	0.270686
seq.13604.27	E3 ubiquitin-protein ligase NEURL1	O76050	NEURL1	baseline	0.0110805	0.0395863	398.196	-0.279907	0.779695	0.909002
seq.13605.16	Annexin A10	Q9UJ72	ANXA10	baseline	-0.0658332	0.0483962	436.951	1.3603	0.174437	0.472716
seq.13609.11	General transcription factor II-I	P78347	GTF2I	baseline	0.121915	0.0448153	424.231	-2.72039	0.00678851	0.0766754
seq.13610.9	Melanoma-associated antigen 10	P43363	MAGEA10	baseline	-0.147067	0.0606205	422.342	2.42603	0.015683	0.13091
seq.13612.7	Cytohesin-interacting protein	O60759	CYTIP	baseline	0.0729482	0.0843582	324.314	-0.864743	0.387819	0.680654
seq.13613.23	Adenylate kinase isoenzyme 5	Q9Y6K8	AK5	baseline	-0.0390956	0.0758917	390.548	0.51515	0.60674	0.822852
seq.13614.6	CREB-binding protein	Q92793	CREBBP	baseline	-0.0408224	0.0499565	450.742	0.81716	0.414269	0.701651
seq.13615.60	Cytoplasmic protein NCK2	O43639	NCK2	baseline	-0.157789	0.0865809	448.475	1.82244	0.0690538	0.305949
seq.13618.15	Mitotic spindle assembly checkpoint protein MAD1	Q9Y6D9	MAD1L1	baseline	-0.0164534	0.0372005	447.56	0.442289	0.658494	0.850666
seq.13620.10	ATPase ASNA1	O43681	GET3	baseline	0.337458	0.0704638	452.273	-4.78911	2.27412e-06	0.000308468
seq.13621.31	AP-2 complex subunit alpha-2	O94973	AP2A2	baseline	-0.0381833	0.077868	451.921	0.490359	0.624118	0.832624
seq.13622.16	Serine/threonine-protein phosphatase 2A 56 kDa regulatory subunit alpha isoform	Q15172	PPP2R5A	baseline	-0.0300774	0.0767978	452.349	0.391644	0.695506	0.868354
seq.13623.4	Histone-lysine N-methyltransferase 2D	O14686	KMT2D	baseline	0.00853415	0.0354119	450.471	-0.240996	0.809668	0.922239
seq.13624.17	NAD kinase	O95544	NADK	baseline	0.430939	0.142684	422.143	-3.02023	0.00267922	0.0405225
seq.13625.19	Lupus La protein:HTH La-type RNA-binding domain	P05455	SSB	baseline	0.0565793	0.0452686	385.348	-1.24986	0.212111	0.515252
seq.13628.58	Growth factor receptor-bound protein 14	Q14449	GRB14	baseline	-0.0161173	0.0474804	450.21	0.339453	0.734427	0.889888
seq.13629.25	Cysteine protease ATG4B	Q9Y4P1	ATG4B	baseline	-0.111671	0.189117	384.053	0.590485	0.555213	0.795153
seq.13631.1	Retinoblastoma-binding protein 5	Q15291	RBBP5	baseline	0.135771	0.0379518	435.254	-3.57746	0.00038591	0.0099033
seq.13632.10	Zyxin	Q15942	ZYX	baseline	-0.0874354	0.0952808	380.167	0.917659	0.359379	0.662583
seq.13634.209	Pirin	O00625	PIR	baseline	-0.00454924	0.0640671	449.234	0.0710073	0.943424	0.981464
seq.13636.20	Nucleosome assembly protein 1-like 1	P55209	NAP1L1	baseline	-0.07246	0.0912852	452.67	0.793777	0.427741	0.711924
seq.13639.101	General vesicular transport factor p115	O60763	USO1	baseline	-0.0962547	0.100836	435.502	0.954571	0.340324	0.64646
seq.13640.5	B-cell lymphoma 6 protein	P41182	BCL6	baseline	-0.113658	0.0634583	345.173	1.79106	0.0741598	0.316423
seq.13642.90	Interferon-induced protein with tetratricopeptide repeats 3	O14879	IFIT3	baseline	0.119343	0.127974	419.906	-0.932553	0.351587	0.656826
seq.13644.30	Hepatocyte growth factor-regulated tyrosine kinase substrate	O14964	HGS	baseline	-0.0978031	0.133303	446.68	0.73369	0.463523	0.736594
seq.13645.14	Pre-mRNA-splicing factor ATP-dependent RNA helicase PRP16	Q92620	DHX38	baseline	0.0535117	0.0436366	426.412	-1.2263	0.220762	0.525182
seq.13650.11	Kv channel-interacting protein 1	Q9NZI2	KCNIP1	baseline	-0.0780974	0.0821676	418.35	0.950465	0.342425	0.648158
seq.13651.54	E3 ubiquitin-protein ligase ZFP91	Q96JP5	ZFP91	baseline	0.161849	0.129633	353.843	-1.24852	0.212668	0.515619
seq.13652.2	TOM1-like protein 1	O75674	TOM1L1	baseline	-0.0221126	0.0364613	431.542	0.606468	0.544523	0.789802
seq.13653.335	O-acetyl-ADP-ribose deacetylase MACROD1	Q9BQ69	MACROD1	baseline	-0.102289	0.0609786	374.094	1.67746	0.0942884	0.356858
seq.13654.1	Rho-associated protein kinase 2	O75116	ROCK2	baseline	-0.0430628	0.102214	452.059	0.4213	0.673736	0.857955
seq.13655.34	Nucleolin	P19338	NCL	baseline	0.220107	0.0793751	432.129	-2.773	0.0057946	0.0690046
seq.13657.2	Bifunctional polynucleotide phosphatase/kinase	Q96T60	PNKP	baseline	-0.0749542	0.0921732	445.506	0.813188	0.416544	0.703909
seq.13658.31	Platelet-derived growth factor C	Q9NRA1	PDGFC	baseline	-0.0660386	0.119883	346.8	0.550861	0.582084	0.809661
seq.13659.36	Manganese-transporting ATPase 13A1	Q9HD20	ATP13A1	baseline	-0.0544334	0.0617627	454.879	0.881332	0.378604	0.677517
seq.13660.76	Angiopoietin-2	O15123	ANGPT2	baseline	0.0240981	0.0956398	430.347	-0.251968	0.801186	0.917956
seq.13661.193	Cystatin-D	P28325	CST5	baseline	0.00367423	0.0817441	369.165	-0.044948	0.964173	0.988144
seq.13663.2	Interleukin-4	P05112	IL4	baseline	-0.067871	0.0393825	450.954	1.72338	0.0855054	0.339097
seq.13665.35	Serine/threonine-protein phosphatase 2A regulatory subunit B'' subunit alpha	Q06190	PPP2R3A	baseline	-0.135846	0.0408867	445.229	3.3225	0.000965715	0.018916
seq.13666.222	Carbonic anhydrase-related protein 10	Q9NS85	CA10	baseline	-0.105095	0.0618123	366.452	1.70024	0.0899351	0.348708
seq.13668.44	Tyrosine-protein kinase receptor TYRO3	Q06418	TYRO3	baseline	-0.122792	0.0621015	380.828	1.97728	0.0487311	0.255813
seq.13669.6	Fibroblast growth factor receptor 3:Extracellular domain	P22607	FGFR3	baseline	-0.150598	0.0762249	442.191	1.9757	0.0488099	0.255873
seq.13670.81	Group IIE secretory phospholipase A2	Q9NZK7	PLA2G2E	baseline	0.110773	0.0878131	331.405	-1.26146	0.208029	0.51075
seq.13671.40	Neutrophil elastase	P08246	ELANE	baseline	-0.0412044	0.0568515	446.801	0.724773	0.468971	0.742146
seq.13672.3	Heat shock 70 kDa protein 6	P17066	HSPA6	baseline	-0.0738528	0.0383989	436.198	1.92331	0.0550923	0.270686
seq.13673.21	T-complex protein 1 subunit eta	Q99832	CCT7	baseline	-0.0917308	0.181913	449.289	0.504257	0.614328	0.826649
seq.13676.46	Inhibin beta B chain	P09529	INHBB	baseline	-0.00673033	0.103325	428.72	0.0651376	0.948095	0.982903
seq.13678.169	Complement factor D	P00746	CFD	baseline	-0.0091831	0.0469831	444.524	0.195455	0.845126	0.938977
seq.13680.3	NGFI-A-binding protein 2	Q15742	NAB2	baseline	0.126855	0.0528018	419.236	-2.40248	0.0167183	0.135098
seq.13681.173	Casein kinase II subunit alpha'	P19784	CSNK2A2	baseline	0.0429124	0.0290211	447.644	-1.47866	0.139935	0.427228
seq.13682.47	Macrophage colony-stimulating factor 1 receptor	P07333	CSF1R	baseline	-0.0461951	0.0616595	379.177	0.749197	0.454203	0.728283
seq.13683.18	Chloride channel protein ClC-Kb	P51801	CLCNKB	baseline	0.0454447	0.146025	450.383	-0.311212	0.755783	0.898748
seq.13686.2	Interleukin-5 receptor subunit alpha	Q01344	IL5RA	baseline	0.225496	0.115003	410.953	-1.96078	0.0505801	0.260356
seq.13687.5	C-C motif chemokine 1	P22362	CCL1	baseline	-0.0549752	0.0402523	438.792	1.36576	0.172713	0.470474
seq.13688.2	Calcyphosin-like protein	Q8WWF8	CAPSL	baseline	-0.0476342	0.0723866	353.448	0.658052	0.510933	0.767612
seq.13689.2	Ornithine decarboxylase	P11926	ODC1	baseline	-0.0543031	0.0412611	431.302	1.31609	0.188844	0.489076
seq.13690.26	Biglycan	P21810	BGN	baseline	-0.0623318	0.062431	428.071	0.998412	0.318644	0.628353
seq.13691.10	Sodium-coupled monocarboxylate transporter 1	Q8N695	SLC5A8	baseline	-0.141204	0.0670186	435.904	2.10694	0.0356939	0.216041
seq.13692.154	WNT1-inducible-signaling pathway protein 1	O95388	CCN4	baseline	0.0159096	0.0615789	373.006	-0.258362	0.79627	0.915741
seq.13693.5	Cerebral dopamine neurotrophic factor	Q49AH0	CDNF	baseline	0.0619338	0.0253206	444.696	-2.44599	0.0148323	0.12718
seq.13694.24	Cytokine receptor-like factor 2	Q9HC73	CRLF2	baseline	-0.00341793	0.0630563	370.326	0.0542044	0.956802	0.987084
seq.13697.51	Glycerol-3-phosphate dehydrogenase [NAD(+)], cytoplasmic	P21695	GPD1	baseline	-0.164598	0.141355	446.529	1.16443	0.244873	0.548527
seq.13698.28	Dyslexia-associated protein KIAA0319-like protein	Q8IZA0	KIAA0319L	baseline	0.0544472	0.0347548	420.208	-1.56661	0.117959	0.393162
seq.13699.6	Prostate-specific antigen	P07288	KLK3	baseline	0.152536	0.154176	385.399	-0.989366	0.323105	0.631413
seq.13700.10	Annexin A2	P07355	ANXA2	baseline	0.136821	0.0897903	444.955	-1.52379	0.128272	0.409393
seq.13701.2	C-X-C motif chemokine 13	O43927	CXCL13	baseline	0.265503	0.115689	434.024	-2.29498	0.0222106	0.162692
seq.13704.5	Hydroxymethylglutaryl-CoA synthase, mitochondrial	P54868	HMGCS2	baseline	-0.181683	0.117231	446.108	1.54979	0.121901	0.39809
seq.13706.12	Interleukin-12 receptor subunit beta-1	P42701	IL12RB1	baseline	-0.0844974	0.0361468	439.648	2.33762	0.0198549	0.150969
seq.13707.27	SPARC-like protein 1	Q14515	SPARCL1	baseline	0.00174631	0.0856145	454.674	-0.0203974	0.983735	0.994109
seq.13708.56	Kallikrein-8	O60259	KLK8	baseline	-0.102939	0.06705	388.011	1.53526	0.125535	0.404095
seq.13710.6	Plasma protease C1 inhibitor	P05155	SERPING1	baseline	0.0132312	0.0375302	411.75	-0.352549	0.724607	0.884035
seq.13711.10	Clathrin heavy chain 1	Q00610	CLTC	baseline	0.0164702	0.0280949	440.796	-0.586236	0.558017	0.797016
seq.13712.104	Granzyme A	P12544	GZMA	baseline	0.0142459	0.0777625	403.557	-0.183198	0.854735	0.942794
seq.13713.164	Vesicle-trafficking protein SEC22a	Q96IW7	SEC22A	baseline	-0.109827	0.0735841	438.465	1.49254	0.136277	0.422171
seq.13717.15	Ficolin-2	Q15485	FCN2	baseline	-0.100381	0.070067	379.936	1.43265	0.152781	0.442103
seq.13719.19	Serine/threonine-protein kinase PAK 4	O96013	PAK4	baseline	-0.12141	0.0925447	447.095	1.3119	0.190225	0.490979
seq.13720.95	Myeloblastin	P24158	PRTN3	baseline	0.169653	0.0835978	437.886	-2.0294	0.0430217	0.238706
seq.13722.105	Complement component C9	P02748	C9	baseline	-0.0217325	0.0406556	441.908	0.534551	0.59323	0.816648
seq.13723.6	Interleukin-10	P22301	IL10	baseline	-0.0581648	0.0987796	354.295	0.588834	0.556348	0.795952
seq.13724.27	Fibroblast growth factor 19	O95750	FGF19	baseline	-0.0112991	0.126525	452.913	0.0893036	0.92888	0.974554
seq.13725.3	Fibroblast growth factor 16	O43320	FGF16	baseline	-0.00490331	0.0370327	421.361	0.132405	0.894727	0.960343
seq.13726.4	T-lymphocyte activation antigen CD80	P33681	CD80	baseline	-0.0995928	0.0783485	364.668	1.27115	0.204485	0.507304
seq.13727.44	Speckle-type POZ protein	O43791	SPOP	baseline	-0.0492664	0.0781344	355.213	0.630534	0.528751	0.778692
seq.13728.19	Endoplasmic reticulum resident protein 29	P30040	ERP29	baseline	0.102653	0.0983515	448.672	-1.04373	0.297172	0.609072
seq.13729.26	Sideroflexin-5	Q8TD22	SFXN5	baseline	-0.0941941	0.0776545	355.032	1.21299	0.22594	0.529051
seq.13730.18	Dipeptidyl peptidase 1	P53634	CTSC	baseline	0.0117899	0.0593731	431.115	-0.198574	0.84269	0.93834
seq.13731.14	Complement component C7	P10643	C7	baseline	0.0029465	0.0521758	365.987	-0.0564726	0.954996	0.986605
seq.13732.79	Cardiotrophin-1	Q16619	CTF1	baseline	0.0915957	0.0426467	417.156	-2.14778	0.0323065	0.20399
seq.13733.5	Interleukin-12 subunit beta	P29460	IL12B	baseline	0.0206472	0.0763175	399.584	-0.270543	0.786882	0.911148
seq.13734.22	Interferon lambda-1	Q8IU54	IFNL1	baseline	0.413259	0.0952235	435.986	-4.33988	1.77369e-05	0.00117234
seq.13735.1	Rap1 GTPase-activating protein 1	P47736	RAP1GAP	baseline	-0.103503	0.0698314	331.311	1.48218	0.139243	0.426314
seq.13738.8	Inhibin beta A chain	P08476	INHBA	baseline	0.0983349	0.0820924	426.767	-1.19786	0.231638	0.534692
seq.13739.3	Leucine-rich repeat transmembrane protein FLRT1	Q9NZU1	FLRT1	baseline	-0.0631142	0.0641	407.978	0.98462	0.325394	0.633606
seq.13740.51	Secreted frizzled-related protein 3	Q92765	FRZB	baseline	0.0419226	0.11982	432.757	-0.34988	0.726599	0.885266
seq.13741.36	Insulin-like growth factor-binding protein 1	P08833	IGFBP1	baseline	0.208929	0.172115	429.762	-1.21389	0.225457	0.528429
seq.13742.66	Interleukin-22	Q9GZX6	IL22	baseline	-0.120695	0.086596	427.344	1.39377	0.164112	0.45915
seq.13743.56	Cullin-4B	Q13620	CUL4B	baseline	0.0255634	0.0398707	435.921	-0.641158	0.521757	0.773924
seq.13744.37	Interleukin-3 receptor subunit alpha	P26951	IL3RA	baseline	-0.0410223	0.0807501	405.736	0.508015	0.611719	0.825772
seq.13745.10	Polycystin-2:Cytoplasmic domain 4	Q13563	PKD2	baseline	-0.0803083	0.048464	453.547	1.65707	0.0981969	0.363501
seq.13747.9	Carbonic anhydrase 6	P23280	CA6	baseline	-0.0502134	0.105742	364.572	0.474867	0.635166	0.837625
seq.13748.4	C-C motif chemokine 8	P80075	CCL8	baseline	0.176139	0.102778	405.294	-1.71378	0.0873344	0.343193
seq.13924.13	Myocardial zonula adherens protein	P0CAP1	MYZAP	baseline	-0.0924243	0.0630815	345.06	1.46516	0.143789	0.431602
seq.13926.1	RecQ-mediated genome instability protein 1	Q9H9A7	RMI1	baseline	0.0237061	0.0283012	447.531	-0.837636	0.402682	0.691602
seq.13929.27	Peroxisomal carnitine O-octanoyltransferase	Q9UKG9	CROT	baseline	-0.0866905	0.0733483	417.585	1.1819	0.237918	0.540599
seq.13930.3	DNA dC->dU-editing enzyme APOBEC-3G	Q9HC16	APOBEC3G	baseline	0.0535284	0.0839917	447.024	-0.637306	0.524252	0.775505
seq.13931.22	26S proteasome non-ATPase regulatory subunit 9	O00233	PSMD9	baseline	0.303132	0.135799	457.27	-2.23221	0.0260849	0.179577
seq.13932.45	Rho guanine nucleotide exchange factor 7	Q14155	ARHGEF7	baseline	-0.0710836	0.0431585	450.389	1.64704	0.100248	0.366979
seq.13933.276	NGFI-A-binding protein 1	Q13506	NAB1	baseline	-0.101213	0.074571	451.661	1.35727	0.175373	0.473389
seq.13934.3	Guanine nucleotide exchange factor DBS	O15068	MCF2L	baseline	-0.115487	0.0453657	434.676	2.54569	0.0112506	0.107632
seq.13936.24	Phosphoglycerate kinase 2	P07205	PGK2	baseline	-0.0132397	0.0489462	348.105	0.270496	0.786939	0.911148
seq.13937.75	Cullin-associated NEDD8-dissociated protein 1	Q86VP6	CAND1	baseline	0.159408	0.0832532	455.597	-1.91474	0.0561522	0.273159
seq.13939.14	UTP--glucose-1-phosphate uridylyltransferase	Q16851	UGP2	baseline	0.147368	0.11524	439.389	-1.27879	0.201645	0.50418
seq.13940.19	Gamma-interferon-inducible protein 16:Isoform 2, Hematopoietic expression, interferon-inducible nature, and nuclear localization 1	Q16666	IFI16	baseline	0.0685167	0.114045	454.077	-0.600785	0.548283	0.791484
seq.13941.82	Phenylalanine--tRNA ligase, mitochondrial	O95363	FARS2	baseline	-0.0929448	0.0370743	415.914	2.50698	0.012557	0.11548
seq.13942.140	SPRY domain-containing SOCS box protein 1	Q96BD6	SPSB1	baseline	-0.0981784	0.0587244	450.232	1.67185	0.0952485	0.358814
seq.13943.38	Protein dpy-30 homolog	Q9C005	DPY30	baseline	0.54813	0.111161	429.831	-4.93098	1.17097e-06	0.00019766
seq.13944.3	Sulfotransferase 1A3	P0DMM9	SULT1A3	baseline	-0.287661	0.13293	435.538	2.164	0.0310072	0.199433
seq.13946.8	Probable ATP-dependent RNA helicase DDX23	Q9BUQ8	DDX23	baseline	-0.108996	0.0677554	369.738	1.60867	0.108543	0.378733
seq.13947.371	Peroxisomal NADH pyrophosphatase NUDT12	Q9BQG2	NUDT12	baseline	0.0239071	0.0608534	416.277	-0.392864	0.694621	0.86799
seq.13948.50	Gamma-aminobutyric acid type B receptor subunit 2:Extracellular domain	O75899	GABBR2	baseline	0.0742317	0.114532	348.407	-0.648133	0.517326	0.771418
seq.13950.9	Collagen type IV alpha-3-binding protein:StAR-related lipid-transfer domain, isoform 2	Q9Y5P4	CERT1	baseline	-0.0394703	0.0966843	447.606	0.408239	0.683294	0.862606
seq.13954.9	Glucosamine 6-phosphate N-acetyltransferase	Q96EK6	GNPNAT1	baseline	-0.138303	0.0950963	446.61	1.45435	0.146552	0.435285
seq.13955.33	Death-associated protein kinase 1	P53355	DAPK1	baseline	-0.0491552	0.0743404	448.576	0.661218	0.508812	0.765732
seq.13958.5	Probable RNA-binding protein 46	Q8TBY0	RBM46	baseline	0.027759	0.0420607	420.105	-0.659975	0.509631	0.766263
seq.13959.7	Cytosol aminopeptidase	P28838	LAP3	baseline	0.146449	0.101389	438.967	-1.44443	0.149331	0.437884
[truncated: 5,901 more rows]

## Sheet: SDF3
SeqID	protein	UniProt ID	GeneID	time	estimate	SE	df	t.ratio	p-value	adjusted p-value
[truncated: 7,288 more rows]

## Sheet: SDF4
SeqID	protein	UniProt ID	GeneID	term	Estimate	SE	df	t.value	p-value	adjusted p-value
[truncated: 7,288 more rows]

[truncated: 10 more sheets: SDF5, SDF6, SDF7, SDF8, SDF9, SDF10, SDF11, SDF12, SDF13, SDF14]
